# Supplementary material
Source: publisher figshare collection journal article supplement (https://acs.figshare.com/ndownloader/files/3817132)
Supplement: Supplementary file 1 [file 3817132]

 
data_MUF-77-Methyl

_audit_creation_method           SHELXL-2013
_chemical_name_systematic        
;
 ?
;
_chemical_name_common            ?
_chemical_melting_point          ?
_chemical_formula_moiety         ?
_chemical_formula_sum            'C59 H42 O13 Zn4'
_chemical_formula_weight         1220.40

loop_
_atom_type_symbol
_atom_type_description
_atom_type_scat_dispersion_real
_atom_type_scat_dispersion_imag
_atom_type_scat_source
C C 0.0181 0.0091 'International Tables Vol C Tables 4.2.6.8 and 6.1.1.4'
H H 0.0000 0.0000 'International Tables Vol C Tables 4.2.6.8 and 6.1.1.4'
O O 0.0492 0.0322 'International Tables Vol C Tables 4.2.6.8 and 6.1.1.4'
Zn Zn -1.5491 0.6778 'International Tables Vol C Tables 4.2.6.8 and 6.1.1.4'

_space_group_crystal_system      cubic
_space_group_IT_number           200
_space_group_name_H-M_alt        'P m -3'
_space_group_name_Hall           '-P 2 2 3'

_shelx_space_group_comment       
;
The symmetry employed for this shelxl refinement is uniquely defined
by the following loop, which should always be used as a source of
symmetry information in preference to the above space-group names.
They are only intended as comments.
;

loop_
_space_group_symop_operation_xyz
'x, y, z'
'-x, -y, z'
'-x, y, -z'
'x, -y, -z'
'z, x, y'
'z, -x, -y'
'-z, -x, y'
'-z, x, -y'
'y, z, x'
'-y, z, -x'
'y, -z, -x'
'-y, -z, x'
'-x, -y, -z'
'x, y, -z'
'x, -y, z'
'-x, y, z'
'-z, -x, -y'
'-z, x, y'
'z, x, -y'
'z, -x, y'
'-y, -z, -x'
'y, -z, x'
'-y, z, x'
'y, z, -x'

_cell_length_a                   29.9525(3)
_cell_length_b                   29.9525(3)
_cell_length_c                   29.9525(3)
_cell_angle_alpha                90
_cell_angle_beta                 90
_cell_angle_gamma                90
_cell_volume                     26872.0(8)
_cell_formula_units_Z            6
_cell_measurement_temperature    293(2)
_cell_measurement_reflns_used    35948
_cell_measurement_theta_min      6.61
_cell_measurement_theta_max      72.04

_exptl_crystal_description       block
_exptl_crystal_colour            colourless
_exptl_crystal_density_meas      ?
_exptl_crystal_density_method    'not measured'
_exptl_crystal_density_diffrn    0.452
_exptl_crystal_F_000             3720
_exptl_transmission_factor_min   ?
_exptl_transmission_factor_max   ?
_exptl_crystal_size_max          0.864
_exptl_crystal_size_mid          0.721
_exptl_crystal_size_min          0.633
_exptl_absorpt_coefficient_mu    0.769
_shelx_estimated_absorpt_T_min   0.556
_shelx_estimated_absorpt_T_max   0.642
_exptl_absorpt_correction_type   multi-scan
_exptl_absorpt_correction_T_min  0.695629
_exptl_absorpt_correction_T_max  1.000000
_exptl_absorpt_process_details   '(ABSCOR; Higashi, 1995)'

_exptl_special_details           
;
 ?
;

_diffrn_ambient_temperature      293(2)
_diffrn_radiation_wavelength     1.54178

_diffrn_radiation_type           CuK\a
_diffrn_source                   'Rigaku MM007 rotating anode'
_diffrn_measurement_device_type  'Rigaku Spider'
_diffrn_measurement_method       \w-scans
_diffrn_detector_area_resol_mean 10
_diffrn_reflns_number            63191
_diffrn_reflns_av_unetI/netI     0.0185
_diffrn_reflns_av_R_equivalents  0.0319
_diffrn_reflns_limit_h_min       -22
_diffrn_reflns_limit_h_max       27
_diffrn_reflns_limit_k_min       -28
_diffrn_reflns_limit_k_max       35
_diffrn_reflns_limit_l_min       -36
_diffrn_reflns_limit_l_max       18
_diffrn_reflns_theta_min         6.609
_diffrn_reflns_theta_max         72.032
_diffrn_reflns_theta_full        67.679
_diffrn_measured_fraction_theta_max 0.986
_diffrn_measured_fraction_theta_full 0.993
_diffrn_reflns_Laue_measured_fraction_max 0.986
_diffrn_reflns_Laue_measured_fraction_full 0.993
_diffrn_reflns_point_group_measured_fraction_max 0.986
_diffrn_reflns_point_group_measured_fraction_full 0.993
_reflns_number_total             9240
_reflns_number_gt                8556
_reflns_threshold_expression     'I > 2\s(I)'
_reflns_Friedel_coverage         0.000
_reflns_Friedel_fraction_max     .
_reflns_Friedel_fraction_full    .

_reflns_special_details          
;
 Reflections were merged by SHELXL according to the crystal
 class for the calculation of statistics and refinement.
 
 _reflns_Friedel_fraction is defined as the number of unique
 Friedel pairs measured divided by the number that would be
 possible theoretically, ignoring centric projections and
 systematic absences.
;

_computing_data_collection       'CrystalClear (Rigaku, 2005)'
_computing_cell_refinement       'FSProcess in Process-Auto (Rigaku, 1998)'
_computing_data_reduction        'FSProcess in Process-Auto (Rigaku, 1998)'
_computing_structure_solution    'SHELXS-97 (Sheldrick, 2008)'
_computing_structure_refinement  'SHELXL-97 (Sheldrick, 1997)'
_computing_molecular_graphics    'OLEX (Dolomanov, 2003)'
_computing_publication_material  'SHELXL-97 (Sheldrick, 1997)'

_refine_special_details          
;
 ?
;
_refine_ls_structure_factor_coef Fsqd
_refine_ls_matrix_type           full
_refine_ls_weighting_scheme      calc
_refine_ls_weighting_details     
;
 w=1/[\s^2^(Fo^2^)+(0.0327P)^2^+5.5884P]
 where P=(Fo^2^+2Fc^2^)/3
;
_atom_sites_solution_primary     ?
_atom_sites_solution_secondary   ?
_atom_sites_solution_hydrogens   geom

_refine_ls_hydrogen_treatment    constr
_refine_ls_extinction_method     none
_refine_ls_extinction_coef       .
_refine_ls_number_reflns         9240
_refine_ls_number_parameters     195
_refine_ls_number_restraints     0
_refine_ls_R_factor_all          0.0315
_refine_ls_R_factor_gt           0.0292
_refine_ls_wR_factor_ref         0.0797
_refine_ls_wR_factor_gt          0.0771
_refine_ls_goodness_of_fit_ref   1.068
_refine_ls_restrained_S_all      1.068
_refine_ls_shift/su_max          0.002
_refine_ls_shift/su_mean         0.000

loop_
_atom_site_label
_atom_site_type_symbol
_atom_site_fract_x
_atom_site_fract_y
_atom_site_fract_z
_atom_site_U_iso_or_equiv
_atom_site_adp_type
_atom_site_occupancy
_atom_site_site_symmetry_order
_atom_site_calc_flag
_atom_site_refinement_flags_posn
_atom_site_refinement_flags_adp
_atom_site_refinement_flags_occupancy
_atom_site_disorder_assembly
_atom_site_disorder_group
Zn1 Zn 0.05332(2) 0.17736(2) 0.5000 0.03021(6) Uani 1 2 d S T P . .
Zn2 Zn 0.0000 0.25139(2) 0.44672(2) 0.03142(6) Uani 1 2 d S T P . .
O1 O 0.0000 0.21437(4) 0.5000 0.0276(3) Uani 1 4 d S T P . .
O5 O 0.05275(3) 0.24117(3) 0.41086(3) 0.0592(3) Uani 1 1 d . . . . .
O4 O 0.08913(3) 0.18763(3) 0.44736(3) 0.0596(3) Uani 1 1 d . . . . .
O2 O 0.03709(4) 0.11493(4) 0.5000 0.0600(4) Uani 1 2 d S T P . .
C1 C 0.0000 0.09604(7) 0.5000 0.0468(6) Uani 1 4 d S T P . .
C4 C 0.0000 0.33233(8) 0.5000 0.0558(7) Uani 1 4 d S T P . .
O3 O 0.0000 0.31367(4) 0.46293(5) 0.0713(4) Uani 1 2 d S T P . .
C9 C 0.08455(4) 0.21429(4) 0.41567(4) 0.0505(3) Uani 1 1 d . . . . .
C2 C 0.0000 0.04599(7) 0.5000 0.0524(6) Uani 1 4 d S T P . .
C15 C 0.11982(5) 0.24628(5) 0.34721(5) 0.0700(5) Uani 1 1 d . . . . .
H15 H 0.0976 0.2679 0.3464 0.084 Uiso 1 1 calc R U . . .
C13 C 0.18649(6) 0.21346(6) 0.31527(6) 0.0786(5) Uani 1 1 d . . . . .
C3 C 0.03933(7) 0.02314(6) 0.5000 0.0813(8) Uani 1 2 d S T P . .
H3 H 0.0662 0.0386 0.5000 0.098 Uiso 1 2 calc R U P . .
C14 C 0.15306(5) 0.24590(5) 0.31511(5) 0.0736(5) Uani 1 1 d . . . . .
C10 C 0.11991(5) 0.21426(5) 0.38049(5) 0.0637(4) Uani 1 1 d . . . . .
C11 C 0.15313(6) 0.18204(6) 0.38100(6) 0.0874(6) Uani 1 1 d . . . . .
H11 H 0.1533 0.1606 0.4034 0.105 Uiso 1 1 calc R U . . .
C17 C 0.20046(5) 0.26041(6) 0.25438(6) 0.0770(5) Uani 1 1 d . . . . .
C5 C 0.0000 0.38223(8) 0.5000 0.0758(10) Uani 1 4 d S T P . .
C16 C 0.21652(6) 0.22228(6) 0.27642(5) 0.0774(5) Uani 1 1 d . . . . .
C12 C 0.18609(6) 0.18132(6) 0.34861(6) 0.0994(8) Uani 1 1 d . . . . .
H12 H 0.2080 0.1593 0.3492 0.119 Uiso 1 1 calc R U . . .
C18 C 0.15846(6) 0.27862(6) 0.27712(6) 0.0821(6) Uani 1 1 d . . . . .
C20 C 0.11727(6) 0.27607(8) 0.24719(7) 0.1099(8) Uani 1 1 d . . . . .
H20A H 0.1120 0.2456 0.2389 0.165 Uiso 1 1 calc R U . . .
H20B H 0.1221 0.2936 0.2208 0.165 Uiso 1 1 calc R U . . .
H20C H 0.0918 0.2874 0.2630 0.165 Uiso 1 1 calc R U . . .
C19 C 0.16633(8) 0.32511(6) 0.29719(7) 0.1107(8) Uani 1 1 d . . . . .
H19A H 0.1397 0.3349 0.3122 0.166 Uiso 1 1 calc R U . . .
H19B H 0.1737 0.3457 0.2738 0.166 Uiso 1 1 calc R U . . .
H19C H 0.1905 0.3237 0.3182 0.166 Uiso 1 1 calc R U . . .
C8 C 0.0000 0.47509(9) 0.5000 0.1092(16) Uani 1 4 d S T P . .
C6 C 0.0000 0.40536(8) 0.46180(10) 0.162(2) Uani 1 2 d S T P . .
H6 H 0.0000 0.3902 0.4347 0.194 Uiso 1 2 calc R U P . .
C7 C 0.0000 0.45183(8) 0.46201(11) 0.180(2) Uani 1 2 d S T P . .
H7 H 0.0000 0.4671 0.4350 0.216 Uiso 1 2 calc R U P . .

loop_
_atom_site_aniso_label
_atom_site_aniso_U_11
_atom_site_aniso_U_22
_atom_site_aniso_U_33
_atom_site_aniso_U_23
_atom_site_aniso_U_13
_atom_site_aniso_U_12
Zn1 0.03405(11) 0.02337(10) 0.03320(10) 0.000 0.000 0.00085(7)
Zn2 0.03577(11) 0.02449(10) 0.03400(11) 0.00281(7) 0.000 0.000
O1 0.0324(7) 0.0216(6) 0.0288(6) 0.000 0.000 0.000
O5 0.0557(5) 0.0659(6) 0.0561(5) 0.0207(5) 0.0231(4) 0.0173(5)
O4 0.0595(5) 0.0644(6) 0.0549(5) 0.0207(5) 0.0243(4) 0.0175(5)
O2 0.0564(7) 0.0215(5) 0.1020(11) 0.000 0.000 -0.0022(5)
C1 0.0601(15) 0.0223(10) 0.0579(15) 0.000 0.000 0.000
C4 0.0753(18) 0.0224(11) 0.0697(18) 0.000 0.000 0.000
O3 0.1258(13) 0.0236(6) 0.0646(9) -0.0016(6) 0.000 0.000
C9 0.0500(7) 0.0514(7) 0.0503(7) 0.0083(6) 0.0166(6) 0.0066(6)
C2 0.0574(15) 0.0208(10) 0.0791(18) 0.000 0.000 0.000
C15 0.0675(9) 0.0717(9) 0.0707(9) 0.0283(8) 0.0329(8) 0.0320(8)
C13 0.0777(10) 0.0789(10) 0.0793(10) 0.0424(9) 0.0424(9) 0.0406(9)
C3 0.0539(12) 0.0260(9) 0.164(3) 0.000 0.000 -0.0051(8)
C14 0.0748(10) 0.0733(10) 0.0726(10) 0.0363(8) 0.0357(8) 0.0352(8)
C10 0.0629(8) 0.0675(9) 0.0608(8) 0.0226(7) 0.0284(7) 0.0207(7)
C11 0.0899(12) 0.0890(12) 0.0833(11) 0.0490(10) 0.0489(10) 0.0450(10)
C17 0.0740(10) 0.0773(10) 0.0795(10) 0.0385(8) 0.0426(9) 0.0427(8)
C5 0.133(3) 0.0207(12) 0.074(2) 0.000 0.000 0.000
C16 0.0785(10) 0.0794(10) 0.0744(10) 0.0418(9) 0.0440(9) 0.0399(9)
C12 0.0997(13) 0.0988(13) 0.0998(13) 0.0605(11) 0.0622(11) 0.0627(11)
C18 0.0813(11) 0.0823(11) 0.0826(11) 0.0469(9) 0.0481(9) 0.0462(9)
C20 0.0862(13) 0.1455(19) 0.0979(14) 0.0668(14) 0.0387(11) 0.0528(13)
C19 0.1379(18) 0.0790(12) 0.1152(16) 0.0436(12) 0.0732(15) 0.0459(12)
C8 0.222(5) 0.0221(15) 0.084(2) 0.000 0.000 0.000
C6 0.381(7) 0.0280(12) 0.0765(18) -0.0007(12) 0.000 0.000
C7 0.431(8) 0.0267(11) 0.082(2) 0.0049(12) 0.000 0.000

_geom_special_details            
;
 All esds (except the esd in the dihedral angle between two l.s. planes)
 are estimated using the full covariance matrix.  The cell esds are taken
 into account individually in the estimation of esds in distances, angles
 and torsion angles; correlations between esds in cell parameters are only
 used when they are defined by crystal symmetry.  An approximate (isotropic)
 treatment of cell esds is used for estimating esds involving l.s. planes.
;

loop_
_geom_bond_atom_site_label_1
_geom_bond_atom_site_label_2
_geom_bond_distance
_geom_bond_site_symmetry_2
_geom_bond_publ_flag
Zn1 O4 1.9315(8) 14_556 ?
Zn1 O4 1.9315(8) . ?
Zn1 O2 1.9319(11) . ?
Zn1 O1 1.9441(7) . ?
Zn2 O3 1.9275(12) . ?
Zn2 O5 1.9349(8) 16 ?
Zn2 O5 1.9350(8) . ?
Zn2 O1 1.9433(7) . ?
O1 Zn2 1.9432(7) 14_556 ?
O1 Zn1 1.9441(7) 3_556 ?
O5 C9 1.2553(15) . ?
O4 C9 1.2481(15) . ?
O2 C1 1.2467(15) . ?
C1 O2 1.2467(15) 3_556 ?
C1 C2 1.499(3) . ?
C4 O3 1.2432(17) . ?
C4 O3 1.2434(17) 14_556 ?
C4 C5 1.495(3) . ?
C9 C10 1.4941(17) . ?
C2 C3 1.362(2) . ?
C2 C3 1.362(2) 3_556 ?
C15 C10 1.3833(18) . ?
C15 C14 1.3841(19) . ?
C13 C12 1.3870(19) . ?
C13 C14 1.3953(19) . ?
C13 C16 1.4945(18) . ?
C3 C3 1.386(3) 15 ?
C14 C18 1.5105(18) . ?
C10 C11 1.3863(19) . ?
C11 C12 1.384(2) . ?
C17 C16 1.3939(19) 9 ?
C17 C16 1.4041(18) . ?
C17 C18 1.5309(18) . ?
C5 C6 1.338(3) . ?
C5 C6 1.338(3) 14_556 ?
C16 C17 1.3938(19) 5 ?
C18 C20 1.527(3) . ?
C18 C19 1.535(3) . ?
C8 C7 1.334(3) 14_556 ?
C8 C7 1.334(3) . ?
C8 C8 1.492(5) 13_566 ?
C6 C7 1.392(3) . ?

loop_
_geom_angle_atom_site_label_1
_geom_angle_atom_site_label_2
_geom_angle_atom_site_label_3
_geom_angle
_geom_angle_site_symmetry_1
_geom_angle_site_symmetry_3
_geom_angle_publ_flag
O4 Zn1 O4 109.42(6) 14_556 . ?
O4 Zn1 O2 107.09(4) 14_556 . ?
O4 Zn1 O2 107.09(4) . . ?
O4 Zn1 O1 111.43(3) 14_556 . ?
O4 Zn1 O1 111.43(3) . . ?
O2 Zn1 O1 110.19(5) . . ?
O3 Zn2 O5 107.03(4) . 16 ?
O3 Zn2 O5 107.03(4) . . ?
O5 Zn2 O5 109.48(6) 16 . ?
O3 Zn2 O1 110.21(5) . . ?
O5 Zn2 O1 111.45(3) 16 . ?
O5 Zn2 O1 111.44(3) . . ?
Zn2 O1 Zn2 110.41(6) 14_556 . ?
Zn2 O1 Zn1 108.992(4) 14_556 3_556 ?
Zn2 O1 Zn1 108.993(4) . 3_556 ?
Zn2 O1 Zn1 108.990(4) 14_556 . ?
Zn2 O1 Zn1 108.991(4) . . ?
Zn1 O1 Zn1 110.46(6) 3_556 . ?
C9 O5 Zn2 131.09(8) . . ?
C9 O4 Zn1 131.43(8) . . ?
C1 O2 Zn1 131.58(12) . . ?
O2 C1 O2 126.0(2) 3_556 . ?
O2 C1 C2 117.00(10) 3_556 . ?
O2 C1 C2 117.00(10) . . ?
O3 C4 O3 126.6(2) . 14_556 ?
O3 C4 C5 116.72(11) . . ?
O3 C4 C5 116.72(11) 14_556 . ?
C4 O3 Zn2 131.30(14) . . ?
O4 C9 O5 125.53(11) . . ?
O4 C9 C10 117.26(11) . . ?
O5 C9 C10 117.20(11) . . ?
C3 C2 C3 119.7(2) . 3_556 ?
C3 C2 C1 120.16(11) . . ?
C3 C2 C1 120.16(11) 3_556 . ?
C10 C15 C14 119.57(13) . . ?
C12 C13 C14 118.66(13) . . ?
C12 C13 C16 133.51(13) . . ?
C14 C13 C16 107.82(12) . . ?
C2 C3 C3 120.16(11) . 15 ?
C15 C14 C13 121.30(13) . . ?
C15 C14 C18 126.51(12) . . ?
C13 C14 C18 112.19(12) . . ?
C15 C10 C11 119.47(12) . . ?
C15 C10 C9 120.43(12) . . ?
C11 C10 C9 120.09(12) . . ?
C12 C11 C10 121.00(13) . . ?
C16 C17 C16 120.10(13) 9 . ?
C16 C17 C18 128.66(13) 9 . ?
C16 C17 C18 111.23(12) . . ?
C6 C5 C6 117.6(3) . 14_556 ?
C6 C5 C4 121.19(14) . . ?
C6 C5 C4 121.19(14) 14_556 . ?
C17 C16 C17 119.90(13) 5 . ?
C17 C16 C13 132.42(13) 5 . ?
C17 C16 C13 107.68(12) . . ?
C11 C12 C13 119.99(14) . . ?
C14 C18 C20 108.87(16) . . ?
C14 C18 C17 101.07(11) . . ?
C20 C18 C17 112.64(16) . . ?
C14 C18 C19 108.05(15) . . ?
C20 C18 C19 113.54(16) . . ?
C17 C18 C19 111.79(16) . . ?
C7 C8 C7 117.0(3) 14_556 . ?
C7 C8 C8 121.48(15) 14_556 13_566 ?
C7 C8 C8 121.48(15) . 13_566 ?
C5 C6 C7 120.9(3) . . ?
C8 C7 C6 121.7(3) . . ?

loop_
_geom_torsion_atom_site_label_1
_geom_torsion_atom_site_label_2
_geom_torsion_atom_site_label_3
_geom_torsion_atom_site_label_4
_geom_torsion
_geom_torsion_site_symmetry_1
_geom_torsion_site_symmetry_2
_geom_torsion_site_symmetry_3
_geom_torsion_site_symmetry_4
_geom_torsion_publ_flag
Zn1 O2 C1 O2 0.0 . . . 3_556 ?
Zn1 O2 C1 C2 180.0 . . . . ?
O3 C4 O3 Zn2 0.000(1) 14_556 . . . ?
C5 C4 O3 Zn2 180.000(0) . . . . ?
Zn1 O4 C9 O5 -1.8(2) . . . . ?
Zn1 O4 C9 C10 178.18(10) . . . . ?
Zn2 O5 C9 O4 -1.7(2) . . . . ?
Zn2 O5 C9 C10 178.31(10) . . . . ?
O2 C1 C2 C3 180.0 3_556 . . . ?
O2 C1 C2 C3 0.0 . . . . ?
O2 C1 C2 C3 0.0 3_556 . . 3_556 ?
O2 C1 C2 C3 180.0 . . . 3_556 ?
C3 C2 C3 C3 0.0 3_556 . . 15 ?
C1 C2 C3 C3 180.0 . . . 15 ?
C10 C15 C14 C13 0.8(3) . . . . ?
C10 C15 C14 C18 -178.88(19) . . . . ?
C12 C13 C14 C15 -0.3(3) . . . . ?
C16 C13 C14 C15 179.59(19) . . . . ?
C12 C13 C14 C18 179.4(2) . . . . ?
C16 C13 C14 C18 -0.7(2) . . . . ?
C14 C15 C10 C11 -0.5(3) . . . . ?
C14 C15 C10 C9 179.51(17) . . . . ?
O4 C9 C10 C15 -172.52(16) . . . . ?
O5 C9 C10 C15 7.4(2) . . . . ?
O4 C9 C10 C11 7.5(2) . . . . ?
O5 C9 C10 C11 -172.57(17) . . . . ?
C15 C10 C11 C12 -0.3(3) . . . . ?
C9 C10 C11 C12 179.7(2) . . . . ?
O3 C4 C5 C6 0.000(1) . . . . ?
O3 C4 C5 C6 180.000(1) 14_556 . . . ?
O3 C4 C5 C6 180.000(1) . . . 14_556 ?
O3 C4 C5 C6 0.000(1) 14_556 . . 14_556 ?
C16 C17 C16 C17 0.1(4) 9 . . 5 ?
C18 C17 C16 C17 179.30(15) . . . 5 ?
C16 C17 C16 C13 -179.97(16) 9 . . . ?
C18 C17 C16 C13 -0.8(2) . . . . ?
C12 C13 C16 C17 0.7(4) . . . 5 ?
C14 C13 C16 C17 -179.2(2) . . . 5 ?
C12 C13 C16 C17 -179.2(3) . . . . ?
C14 C13 C16 C17 0.9(2) . . . . ?
C10 C11 C12 C13 0.7(4) . . . . ?
C14 C13 C12 C11 -0.4(4) . . . . ?
C16 C13 C12 C11 179.7(2) . . . . ?
C15 C14 C18 C20 -61.3(3) . . . . ?
C13 C14 C18 C20 119.01(19) . . . . ?
C15 C14 C18 C17 179.9(2) . . . . ?
C13 C14 C18 C17 0.2(2) . . . . ?
C15 C14 C18 C19 62.4(3) . . . . ?
C13 C14 C18 C19 -117.26(19) . . . . ?
C16 C17 C18 C14 179.5(2) 9 . . . ?
C16 C17 C18 C14 0.3(2) . . . . ?
C16 C17 C18 C20 63.5(3) 9 . . . ?
C16 C17 C18 C20 -115.67(19) . . . . ?
C16 C17 C18 C19 -65.8(3) 9 . . . ?
C16 C17 C18 C19 115.07(19) . . . . ?
C6 C5 C6 C7 0.000(1) 14_556 . . . ?
C4 C5 C6 C7 180.000(1) . . . . ?
C7 C8 C7 C6 0.000(1) 14_556 . . . ?
C8 C8 C7 C6 180.000(1) 13_566 . . . ?
C5 C6 C7 C8 0.000(1) . . . . ?

_refine_diff_density_max         0.208
_refine_diff_density_min         -0.251
_refine_diff_density_rms         0.029

_shelxl_version_number           2013-2

_shelx_res_file                  
;
TITL LLJ882-ACT in Pm-3
CELL  1.54178  29.9525  29.9525  29.9525   90.000   90.000   90.000
ZERR     6.00   0.0003   0.0003   0.0003    0.000    0.000    0.000
LATT   1
SYMM  - X, - Y,   Z
SYMM  - X,   Y, - Z
SYMM    X, - Y, - Z
SYMM    Z,   X,   Y
SYMM    Z, - X, - Y
SYMM  - Z, - X,   Y
SYMM  - Z,   X, - Y
SYMM    Y,   Z,   X
SYMM  - Y,   Z, - X
SYMM    Y, - Z, - X
SYMM  - Y, - Z,   X
SFAC  C    H    O    ZN
UNIT  354  252  78   24
MERG   2
MORE -1
FMAP   2
PLAN    5
SIZE     0.633   0.721   0.864
ACTA
BOND
CONF
L.S.  32
TEMP    20.00
WGHT    0.032700    5.588400
FVAR       0.17469
ZN1   4    0.053318    0.177356    0.500000    10.50000    0.03405    0.02337 =
         0.03320    0.00000    0.00000    0.00085
ZN2   4    0.000000    0.251392    0.446722    10.50000    0.03577    0.02449 =
         0.03400    0.00281    0.00000    0.00000
O1    3    0.000000    0.214370    0.500000    10.25000    0.03241    0.02160 =
         0.02882    0.00000    0.00000    0.00000
O5    3    0.052753    0.241171    0.410860    11.00000    0.05569    0.06590 =
         0.05609    0.02072    0.02307    0.01734
O4    3    0.089127    0.187627    0.447362    11.00000    0.05949    0.06444 =
         0.05490    0.02071    0.02428    0.01747
O2    3    0.037087    0.114933    0.500000    10.50000    0.05636    0.02154 =
         0.10201    0.00000    0.00000   -0.00223
C1    1    0.000000    0.096036    0.500000    10.25000    0.06014    0.02226 =
         0.05788    0.00000    0.00000    0.00000
C4    1    0.000000    0.332331    0.500000    10.25000    0.07526    0.02236 =
         0.06966    0.00000    0.00000    0.00000
O3    3    0.000000    0.313670    0.462925    10.50000    0.12582    0.02362 =
         0.06461   -0.00155    0.00000    0.00000
C9    1    0.084547    0.214293    0.415674    11.00000    0.05001    0.05135 =
         0.05026    0.00835    0.01661    0.00660
C2    1    0.000000    0.045992    0.500000    10.25000    0.05743    0.02077 =
         0.07915    0.00000    0.00000    0.00000
C15   1    0.119819    0.246282    0.347209    11.00000    0.06751    0.07171 =
         0.07075    0.02828    0.03292    0.03197
AFIX  43
H15   2    0.097570    0.267924    0.346405    11.00000   -1.20000
AFIX   0
C13   1    0.186490    0.213458    0.315275    11.00000    0.07775    0.07891 =
         0.07927    0.04237    0.04241    0.04056
C3    1    0.039327    0.023138    0.500000    10.50000    0.05394    0.02596 =
         0.16406    0.00000    0.00000   -0.00506
AFIX  43
H3    2    0.066238    0.038625    0.500000    10.50000   -1.20000
AFIX   0
C14   1    0.153060    0.245898    0.315112    11.00000    0.07481    0.07330 =
         0.07265    0.03628    0.03566    0.03517
C10   1    0.119909    0.214264    0.380490    11.00000    0.06293    0.06751 =
         0.06078    0.02263    0.02842    0.02074
C11   1    0.153129    0.182039    0.381001    11.00000    0.08991    0.08902 =
         0.08329    0.04902    0.04891    0.04497
AFIX  43
H11   2    0.153272    0.160582    0.403442    11.00000   -1.20000
AFIX   0
C17   1    0.200460    0.260412    0.254382    11.00000    0.07405    0.07735 =
         0.07947    0.03850    0.04262    0.04267
C5    1    0.000000    0.382227    0.500000    10.25000    0.13328    0.02066 =
         0.07357    0.00000    0.00000    0.00000
C16   1    0.216519    0.222280    0.276416    11.00000    0.07849    0.07938 =
         0.07442    0.04183    0.04403    0.03988
C12   1    0.186092    0.181319    0.348610    11.00000    0.09973    0.09881 =
         0.09977    0.06049    0.06219    0.06265
AFIX  43
H12   2    0.207965    0.159290    0.349202    11.00000   -1.20000
AFIX   0
C18   1    0.158460    0.278616    0.277118    11.00000    0.08134    0.08230 =
         0.08261    0.04689    0.04810    0.04624
C20   1    0.117271    0.276069    0.247190    11.00000    0.08621    0.14546 =
         0.09790    0.06677    0.03875    0.05276
AFIX 137
H20A  2    0.111968    0.245570    0.238885    11.00000   -1.50000
H20B  2    0.122121    0.293632    0.220822    11.00000   -1.50000
H20C  2    0.091826    0.287402    0.263045    11.00000   -1.50000
AFIX   0
C19   1    0.166327    0.325106    0.297194    11.00000    0.13786    0.07899 =
         0.11522    0.04356    0.07315    0.04588
AFIX 137
H19A  2    0.139735    0.334924    0.312152    11.00000   -1.50000
H19B  2    0.173662    0.345746    0.273796    11.00000   -1.50000
H19C  2    0.190504    0.323725    0.318190    11.00000   -1.50000
AFIX   0
C8    1    0.000000    0.475091    0.500000    10.25000    0.22161    0.02211 =
         0.08398    0.00000    0.00000    0.00000
C6    1    0.000000    0.405356    0.461799    10.50000    0.38105    0.02798 =
         0.07653   -0.00068    0.00000    0.00000
AFIX  43
H6    2    0.000000    0.390174    0.434714    10.50000   -1.20000
AFIX   0
C7    1    0.000000    0.451828    0.462012    10.50000    0.43138    0.02671 =
         0.08186    0.00492    0.00000    0.00000
AFIX  43
H7    2    0.000000    0.467066    0.434959    10.50000   -1.20000
AFIX   0
HKLF    4

REM  LLJ882-ACT in Pm-3
REM R1 =  0.0292 for    8556 Fo > 4sig(Fo)  and  0.0315 for all    9240 data
REM    195 parameters refined using      0 restraints

END

WGHT      0.0327      5.5884

REM Highest difference peak  0.208,  deepest hole -0.251,  1-sigma level  0.029
Q1    1   0.1073  0.2790  0.3562  11.00000  0.05    0.21
Q2    1   0.0000  0.0677  0.5000  10.25000  0.05    0.20
Q3    1   0.0000  0.3583  0.5000  10.25000  0.05    0.19
Q4    1   0.0301  0.4012  0.4788  11.00000  0.05    0.19
Q5    1   0.0000  0.5000  0.5000  10.12500  0.05    0.19
;
_shelx_res_checksum              42125

_shelx_hkl_file                  
;
  -3   3  -2 4267.17  265.06
  -3  -3   2 4114.14  254.12
  -2   3  -3 4233.18  261.99
   3  -2  -3 4200.66  261.00
   3   3   2 4605.61  276.81
   2  -3  -3 4531.42  278.56
  -2  -3   3 4081.96  252.73
   2   3   3 4226.70  257.22
   3  -2  -3 4511.43  277.90
   3  -3  -2 4320.84  267.05
  -3   2  -3 4557.22  275.37
   3  -3  -2 4495.14  274.21
   2  -3  -3 4457.99  277.19
  -3   2  -3 4061.56  250.54
  -3   2   3 4381.50  270.91
   3  -3   2 3967.30  247.09
  -2  -3  -3 4190.78  255.09
  -3   3   2 4534.42  277.77
  -3   3   2 4270.40  264.34
  -2   3   3 4383.46  272.47
   3  -2   3 4198.86  260.02
   3   3  -2 4028.29  247.59
   2  -3   3 4226.66  263.25
   3   2  -3 4216.22  261.66
  -2   3   3 4500.08  277.07
   2   3  -3 4232.69  261.52
  -3  -3  -2 4693.37  282.09
  -3  -2  -3 4380.19  264.24
  -3   3  -3 1720.32   79.27
   3  -3  -3 1949.69   89.40
   3  -3  -3 1740.46   81.55
  -3  -3  -3 1866.11   82.86
   3  -3   3 1723.41   79.32
   3   3  -3 1800.20   82.54
  -3   3   3 1840.12   85.94
   0  -2  -4 3244.14  176.99
   4   0   2 3035.85  161.49
   2   4   0 3006.20  162.09
   4   0  -2 3046.55  164.39
  -2  -4   0 3018.86  162.72
   0  -2  -4 3175.65  172.38
   0   2   4 3360.36  182.97
   2  -4   0 3064.55  167.24
   0  -2   4 2892.15  160.18
   0   2  -4 2878.97  158.89
  -4   0  -2 3121.58  165.95
  -2   4   0 2993.47  163.61
   3  -4   0 3090.52  173.14
   0  -3  -4 3372.98  188.85
   3   4   0 3132.30  170.22
  -4   0  -3 3104.38  168.92
   0   3   4 2974.66  164.47
   4   0   3 3125.44  170.02
   0  -3  -4 3097.37  172.69
   0   3  -4 3017.78  167.78
   4   0   3 3179.17  173.66
  -3  -4   0 3215.37  175.53
  -3   4   0 3089.86  172.98
  -3   4   0 3261.61  176.40
   0   3   4 3302.04  184.61
   0  -3   4 3285.52  182.87
   4   0  -3 2876.89  158.80
   1  -2  -4  725.83   24.53
   1  -2  -4  766.71   26.60
   1   2   4  745.57   25.26
  -2   4  -1  680.93   23.30
  -4   1  -2  736.23   24.41
   2   4   1  722.63   23.64
   4  -1  -2  683.03   22.85
  -2  -4   1  680.46   23.39
   2  -4  -1  720.30   24.47
  -1   2  -4  684.55   23.36
  -4   1   2  739.09   25.07
   4  -1   2  654.34   21.90
  -2   4   1  722.28   23.75
   1  -2   4  728.26   25.76
  -1   2   4  768.30   25.96
   4  -1   2  692.96   22.27
  -4  -1  -2  697.73   21.64
  -2   4   1  699.79   23.86
   2  -4   1  713.66   24.34
   1   2  -4  729.58   25.79
  -2  -4  -1  710.36   23.60
   2   4  -1  688.23   23.64
  -1  -2  -4  784.93   26.64
  -1  -2  -4  707.72   23.92
  -3   4  -1   15.24    0.94
   1  -3  -4   16.63    0.64
  -1   3  -4   15.41    0.63
   1  -3  -4   16.57    0.59
  -4   1  -3   19.59    0.68
   3   4   1   16.33    0.50
  -3  -4   1   14.67    0.70
   1   3   4   18.32    0.99
   4   1   3   16.48    0.46
   4  -1  -3   16.06    0.53
   3  -4  -1   15.13    0.61
   4  -1   3   15.64    0.46
  -3   4   1   17.32    0.58
   3   4  -1   15.54    0.46
   1  -3   4   16.43    1.10
  -4  -1  -3   17.27    0.41
   1   3  -4   15.53    1.03
   3  -4   1   18.74    0.65
  -3   4   1   14.35    0.57
  -1   3   4   16.55    0.60
  -1  -3  -4   15.56    0.48
   4  -1   3   17.66    0.46
  -1   3   4   16.52    0.82
   4   2   0 1250.77   47.78
  -2   0  -4 1204.65   47.73
   0   4  -2 1278.96   52.27
   0  -4  -2 1208.03   48.13
   2   0   4 1303.19   52.04
   4  -2   0 1299.16   48.87
   0   4   2 1255.77   49.97
   4  -2   0 1253.22   50.07
   0  -4   2 1144.51   46.27
  -4   2   0 1201.78   48.15
  -2   0  -4 1207.34   48.64
   2  -1  -4   65.24    1.88
   1  -4  -2   54.57    1.80
   2   1   4   65.28    1.85
  -2   1  -4   65.64    1.64
  -1  -4   2   68.33    1.62
  -1   4  -2   57.08    1.51
  -2   1  -4   64.70    1.48
   1   4  -2   64.26    1.96
  -2  -1  -4   65.94    1.99
  -1   4   2   59.29    1.41
   1  -4   2   62.12    1.59
  -1   4   2   52.67    1.74
   4   2  -1   73.46    1.57
   2  -1   4   72.16    2.01
  -2  -4   2   99.96    2.73
   2  -2  -4   83.81    2.05
  -2   4  -2   96.59    2.33
   2   2   4   81.44    2.04
  -2   2  -4   93.43    2.19
   4  -2  -2   72.37    2.21
   4  -2   2   87.71    1.99
   2  -4   2   91.56    2.27
   2   4  -2   91.59    2.15
  -2   4   2   73.29    2.35
  -2   4   2   93.74    2.42
   2  -3  -4 1592.37   70.90
   3  -4  -2 1591.02   68.99
  -4   2  -3 1567.00   68.91
   4  -2  -3 1601.85   71.83
  -4   2  -3 1816.12   76.89
   3  -4  -2 1560.65   69.53
   3   4   2 1614.69   69.47
  -3   4  -2 1679.37   75.84
   2   3   4 1578.21   70.11
  -2   3  -4 1563.05   69.54
   4  -2  -3 1687.18   73.60
   2  -3  -4 1758.84   78.73
  -3  -4   2 1517.75   67.97
   2  -3   4 1542.83   68.89
  -4  -2  -3 1604.01   67.41
  -3   4   2 1737.39   75.47
  -2   3   4 1682.68   75.53
   3  -4   2 1651.89   74.55
   2   3  -4 1620.23   73.49
  -3   4   2 1586.42   70.63
  -2  -3  -4 1549.82   68.02
  -4   2   3 1605.20   71.17
  -2   3   4 1621.91   73.02
   3   4  -2 1643.40   72.01
   4  -2   3 1605.32   71.25
  -3  -4  -2 1652.34   71.01
  -4  -2  -3 1520.84   63.80
   0   4  -3 3022.68  168.56
  -3   0  -4 3364.93  184.39
  -4  -3   0 2978.87  159.64
   3   0   4 3363.87  183.56
   0   4   3 3093.78  171.58
   0  -4   3 2930.78  163.91
  -4   3   0 3148.70  172.77
   4  -3   0 3015.11  166.74
   4   3   0 3157.89  168.86
   0   4   3 3075.21  169.95
   0  -4  -3 3176.08  174.01
  -3   0  -4 2944.70  160.16
   3  -1  -4  163.51    4.08
   1   4   3  179.39    4.58
  -1   4  -3  177.12    4.56
   3   1   4  185.17    4.83
   1  -4  -3  169.42    4.77
   4  -3  -1  167.13    3.81
   4   3   1  161.32    3.34
   4  -3  -1  170.27    4.73
  -3   1  -4  188.93    4.84
  -3   1  -4  172.26    4.34
  -4   3  -1  174.75    4.30
   4   3  -1  180.55    4.30
  -1  -4  -3  159.48    3.85
   1   4  -3  177.35    4.51
  -1   4   3  168.03    4.23
   1  -4   3  184.25    4.76
  -1   4   3  184.78    4.59
   4  -3   1  169.15    4.20
  -3  -1  -4  175.78    4.30
   3  -1   4  179.22    4.35
  -4  -3  -1  174.82    3.73
  -4   3   1  159.94    4.49
   3  -2  -4  125.23    3.35
  -2  -4   3  105.69    2.75
  -4   3  -2  113.41    2.74
  -3   2  -4  111.34    2.69
   2  -4  -3  116.33    2.76
   4  -3  -2  111.57    2.75
  -3   2  -4  115.82    2.44
   4  -3  -2  124.84    2.63
   2   4   3  121.68    2.86
   3  -2  -4  113.13    3.23
  -2   4  -3  127.32    3.14
   2  -4  -3  117.51    3.45
   3   2   4  122.32    3.36
  -2   4   3  122.98    3.30
  -4   3   2  120.00    2.90
   2   4  -3  116.16    2.88
  -4  -3  -2  106.99    2.10
   2  -4   3  107.63    2.82
   3  -2   4  109.80    2.74
  -2  -4  -3  112.02    2.73
   4  -3   2  111.81    3.17
  -2   4   3  114.51    3.34
   4   3  -2  113.20    2.95
  -4   3  -3 2272.02  114.76
   4  -3  -3 2188.12  109.36
  -3  -4   3 2328.42  115.72
   3  -4  -3 2341.31  116.74
   3  -3  -4 2372.58  117.65
   3   3   4 2273.60  113.23
  -3   4  -3 2258.02  113.24
   3  -4  -3 2232.06  113.20
  -3   3  -4 2275.64  114.92
   3   4   3 2202.51  107.42
   3  -3  -4 2195.53  111.31
   4  -3  -3 2340.83  115.06
  -4   3  -3 2161.82  102.98
  -3   3   4 2217.11  111.12
  -4  -3  -3 2008.01   95.92
  -3   4   3 2209.08  110.68
  -3  -3  -4 2332.89  113.67
   3   3  -4 2192.62  111.29
  -3  -4  -3 2230.63  108.71
   3   4  -3 2268.05  112.82
   3  -4   3 2307.11  116.96
   4   3  -3 2286.80  113.29
  -4   3   3 2219.20  111.07
   3  -4   3 2308.68  117.09
   3  -3   4 2284.04  115.52
  -3   4   3 2361.47  118.23
   4  -3   3 2384.92  119.85
   0  -4   4 1023.89   39.90
  -4   4   0 1007.18   38.70
   0   4  -4 1044.63   41.30
  -4   0  -4 1020.71   38.30
  -4  -4   0 1012.63   37.67
   0   4   4 1021.23   39.38
   0   4   4 1063.68   41.08
   4   0   4 1046.50   39.36
  -4   4   0 1025.43   36.95
   4  -4   0 1008.46   39.58
   4   4   0 1006.85   37.39
   0  -4  -4 1051.30   40.72
  -4   1  -4   29.15    0.94
  -4   4  -1   27.44    0.50
   4   1   4   25.34    0.65
   1   4   4   28.71    0.89
  -4   4  -1   24.64    1.14
   4  -1  -4   24.28    0.74
  -1   4  -4   28.73    0.92
   4  -4  -1   24.54    0.81
   1   4   4   23.15    0.64
   1  -4  -4   25.42    1.14
   1  -4  -4   27.44    0.86
  -1  -4   4   34.55    1.47
   4   4   1   24.47    0.57
  -1  -4  -4   24.04    0.94
   4  -1   4   29.46    0.73
  -1   4   4   24.91    1.09
   4   4  -1   28.80    0.66
   1  -4   4   27.91    1.43
  -1   4   4   27.31    0.82
   1   4  -4   27.64    1.33
  -4   4   1   25.69    0.63
  -4   4   1   23.32    0.77
   4  -4   1   24.97    1.19
  -4  -4  -1   29.80    0.78
  -4  -1  -4   28.84    0.57
   4  -2  -4   78.15    2.38
   2   4   4   78.58    1.95
  -2  -4   4   78.18    2.11
   2   4   4   83.02    2.14
   4  -4  -2   78.03    2.04
  -4   2  -4   79.17    2.27
   4   4   2   81.88    1.61
   4  -4  -2   86.95    2.03
  -2   4  -4   74.30    2.53
   4   2   4   81.31    2.31
  -4   4  -2   75.56    1.94
  -4  -4   2   78.55    2.16
   2  -4  -4   88.69    2.14
   4  -2  -4   87.92    2.37
   2  -4  -4   80.99    2.06
  -4   2  -4   84.08    1.68
   2  -4   4   76.29    2.11
  -4   4   2   80.74    1.90
  -4   4   2   79.22    2.02
   2   4  -4   78.76    2.57
  -4  -2  -4   78.53    1.53
   4  -4   2   79.13    2.01
   4  -2   4   77.66    1.89
  -4  -4  -2   85.03    1.69
   4   4  -2   78.96    1.80
  -2   4   4   79.86    2.02
  -2  -4  -4   79.48    2.02
  -2   4   4   84.75    2.51
   3  -4  -4 2179.35  109.79
   4   3   4 2059.78  101.61
   4  -3  -4 2179.96  107.89
  -4   3  -4 2144.26  102.54
  -4   4  -3 2190.25  109.98
   4   4   3 2039.63   96.97
  -3   4  -4 2093.54  104.18
   4  -4  -3 2289.00  112.28
   3  -4  -4 2262.48  112.53
  -4   3  -4 2174.74  107.29
   4  -4  -3 2162.72  107.13
   4  -3  -4 2241.89  109.96
  -3  -4  -4 2095.26  101.99
  -4   3   4 2185.95  108.45
   4  -4   3 2183.48  109.55
   4   4  -3 2246.08  111.30
  -3   4   4 2301.09  114.68
   4  -3   4 2172.49  108.59
   4   3  -4 2248.68  112.28
   3  -4   4 2210.97  111.16
  -4   4   3 2148.84  108.18
  -4  -4  -3 2197.61  104.80
  -4  -3  -4 2097.83  100.10
  -3   4   4 2141.85  106.36
   3   4  -4 2132.02  105.55
  -4   4  -4  263.33    7.59
   4  -4  -4  279.35    7.66
   4  -4  -4  259.36    8.26
   4   4  -4  279.43    7.88
  -4  -4  -4  265.17    6.88
   4  -4   4  283.06    8.81
  -4   4   4  261.64    8.40
  -5   0   0 1067.86   39.59
   5   0   0 1083.25   40.17
   0   0  -5 1055.72   40.44
   0   5   0 1051.56   40.44
   0  -5   0 1030.27   40.40
   5   0  -1   22.13    0.70
   0   1  -5   29.82    0.89
   0  -1  -5   26.61    1.13
  -1  -5   0   27.31    0.76
   1  -5   0   26.01    0.82
   1   5   0   24.07    0.71
  -1   5   0   23.91    1.11
   5   0   1   23.66    0.58
   0   2  -5  746.59   26.85
   5   0   2  732.65   23.96
   0  -2  -5  784.08   28.29
   0  -2  -5  834.14   28.96
   0   2   5  744.02   25.94
   2   5   0  685.83   23.45
  -5   0  -2  789.99   25.89
   2  -5   0  701.06   24.59
  -2  -5   0  711.90   25.00
   5   0  -2  648.14   22.50
  -2   5   0  646.90   22.83
  -5   0  -3  411.42   11.82
   0  -3   5  438.00   13.65
   5   0   3  401.99   11.61
   3   5   0  481.65   14.30
  -3   5   0  419.06   12.90
   0   3   5  456.03   14.59
   5   0  -3  427.23   13.01
   0  -3  -5  458.64   14.04
   0   3  -5  402.58   13.26
   5   0   3  465.92   13.51
   0  -3  -5  440.86   13.22
   3  -5   0  452.69   14.51
  -3  -5   0  419.34   12.73
   5   0  -4 1303.33   55.29
  -4   5   0 1277.33   55.07
   0   4  -5 1373.62   59.31
   0  -4   5 1319.01   56.28
  -5   0  -4 1267.71   52.10
   0  -4  -5 1357.88   57.77
   0   4   5 1348.92   56.98
  -4  -5   0 1310.14   53.49
   5   0   4 1334.38   54.61
  -4   5   0 1375.76   55.43
   0   4   5 1275.43   53.60
   4  -5   0 1349.41   57.98
   5   0   4 1391.08   57.26
   4   5   0 1312.10   53.55
   0  -4  -5 1430.41   60.38
   5   1   0 6533.54  448.23
   0  -5   1 6052.78  426.20
   0   5   1 6032.12  425.35
  -1   0  -5 6178.22  435.66
   0  -5  -1 5628.68  395.88
   5  -1   0 6071.43  423.19
  -5   1   0 6299.86  439.17
   0   5  -1 5852.00  414.77
   1  -1  -5  724.46   24.48
   5  -1  -1  667.03   22.02
  -1  -5   1  705.77   23.81
  -1   1  -5  686.02   22.91
  -5   1  -1  676.01   22.28
   1   5   1  674.14   22.59
   1   1   5  744.16   25.07
  -1   5  -1  693.94   24.51
  -1   1  -5  631.31   21.66
   5   1   1  672.80   20.84
   1  -5  -1  663.15   23.37
   1   5  -1  699.07   23.63
   5   1  -1  671.39   21.84
  -1  -1  -5  719.01   24.31
  -1  -5  -1  689.19   23.04
  -5   1   1  717.01   24.00
   5  -1   1  663.22   21.98
  -1   5   1  689.96   23.41
   1  -5   1  660.32   22.60
   1   2   5  659.40   22.50
   2  -5  -1  601.11   20.04
  -5   1  -2  609.60   19.58
  -2   5  -1  623.79   20.81
   2   5   1  619.78   20.33
   1  -2  -5  637.32   21.57
   5   1   2  584.76   17.46
  -1   2  -5  590.72   20.53
   5  -1  -2  614.67   20.39
  -2  -5   1  643.10   21.59
  -2  -5  -1  610.01   19.59
   2  -5   1  608.12   21.17
  -5   1   2  596.76   19.37
   2   5  -1  613.70   20.73
  -5  -1  -2  584.12   17.38
   5   1  -2  575.61   18.67
   1  -2   5  618.87   20.73
   5  -1   2  627.73   20.17
   1   2  -5  640.28   22.30
  -2   5   1  632.34   21.72
  -1   2   5  679.05   23.02
  -1  -2  -5  678.45   23.21
   5  -1   2  622.94   18.90
  -3  -5   1  208.57    5.26
   1   3   5  225.71    5.94
   1  -3  -5  225.96    6.59
   5  -1  -3  202.93    5.62
  -1   3  -5  209.43    5.60
   3  -5  -1  216.32    6.35
   1  -3  -5  215.25    5.62
   3   5   1  203.13    5.24
  -3   5  -1  202.70    5.48
  -5   1  -3  199.65    5.16
  -3   5   1  201.73    5.99
   5  -1   3  207.50    4.95
  -5  -1  -3  202.72    4.58
  -1  -3  -5  207.89    5.25
   1  -3   5  206.13    5.72
   3   5  -1  202.54    5.55
  -3   5   1  214.51    5.50
  -1   3   5  223.70    6.45
   1   3  -5  218.84    6.61
   3  -5   1  200.41    5.45
  -1  -3  -5  238.60    6.98
   5  -1   3  207.69    5.34
  -3  -5  -1  208.03    5.36
   4  -5  -1  666.29   22.92
  -5   1  -4  644.48   21.82
  -4  -5   1  663.76   22.53
  -1  -4   5  637.39   22.36
   1  -4  -5  662.09   23.40
  -4   5  -1  650.81   22.41
   4   5   1  661.03   21.58
   5   1   4  706.79   23.72
   1  -4  -5  705.89   24.99
   1   4   5  687.26   23.60
  -1   4  -5  664.25   23.66
   5  -1  -4  634.90   22.21
  -5  -1  -4  635.07   20.43
   5  -1   4  668.33   22.58
   4  -5   1  665.12   23.61
  -1   4   5  635.74   21.78
  -1  -4  -5  649.92   21.92
   1   4  -5  659.26   23.71
   4   5  -1  684.52   23.13
  -4   5   1  616.36   21.34
  -4  -5  -1  653.16   21.48
   5  -1   4  674.83   21.97
  -1   4   5  689.73   24.48
  -4   5   1  691.06   22.64
   1  -4   5  678.45   24.61
   0  -5  -2  174.27    4.77
  -5   2   0  174.67    4.17
   5  -2   0  171.84    4.48
   0  -5   2  186.85    4.79
   5   2   0  159.39    3.64
   2   0   5  198.46    5.15
   0   5   2  165.31    4.60
  -2   0  -5  172.23    4.72
   0   5  -2  177.74    4.58
   5   2   0  155.32    3.40
  -2   0  -5  176.24    4.32
   2   1   5  385.30   11.12
   5  -2  -1  359.50   10.28
  -2   1  -5  373.19   11.38
  -1   5  -2  359.92   10.74
   2  -1  -5  383.75   11.15
  -5   2  -1  350.85   10.30
  -2   1  -5  404.07   11.73
   1  -5  -2  368.06   10.78
   1   5   2  366.07   10.44
  -1  -5   2  396.41   12.24
  -2  -1  -5  377.35   10.97
   1  -5   2  376.02   11.87
  -1  -5  -2  361.12   10.27
   5  -2   1  360.38   10.16
  -1   5   2  366.11   10.74
  -5   2   1  388.09   11.40
   1   5  -2  368.31   11.51
   2  -2  -5   32.28    0.96
  -5   2  -2   28.40    0.99
   5  -2  -2   24.43    1.07
   2   2   5   30.48    0.91
   2  -5  -2   28.76    0.94
  -2   5  -2   27.40    0.95
   2   5  -2   35.89    1.33
  -2   5   2   33.51    1.14
  -2  -2  -5   32.41    1.01
   2  -5   2   34.63    1.03
   5  -2   2   30.26    0.76
  -3   5  -2   19.02    1.17
  -2   3  -5   22.06    1.11
  -3  -5   2   21.88    0.71
  -5   2  -3   20.64    0.85
   2  -3  -5   20.08    0.74
   2   3   5   20.56    0.77
   3   5   2   18.49    0.66
   2  -3  -5   22.07    0.76
   3  -5  -2   19.37    0.76
  -3   5   2   22.73    0.85
   2  -3   5   22.55    1.26
   3   5  -2   20.27    0.65
   3  -5   2   18.86    0.78
   2   3  -5   22.92    1.24
  -5   2   3   17.78    0.92
  -2  -3  -5   19.29    0.75
  -3  -5  -2   22.85    0.71
  -2   3   5   21.17    0.73
   5  -2   3   20.72    0.88
  -3   5   2   18.60    1.09
  -5  -2  -3   22.76    0.36
  -4  -5   2   68.40    1.90
  -2   4  -5   61.61    1.67
   4  -5  -2   59.67    2.14
  -4   5  -2   61.72    2.13
   2   4   5   59.45    1.62
   5   2   4   61.02    1.72
   4   5   2   56.52    1.28
   2  -4  -5   59.78    2.11
   2  -4  -5   64.70    2.11
  -5   2  -4   59.91    1.42
   2  -4   5   63.98    1.77
   4   5  -2   67.21    1.85
   2   4  -5   61.74    1.71
  -2   4   5   62.81    2.05
  -4   5   2   54.20    1.97
   4  -5   2   62.10    2.14
  -2   4   5   54.77    1.51
   5  -2   4   63.49    1.50
  -4   5   2   61.34    1.33
  -2  -4  -5   58.13    1.62
  -5  -2  -4   69.03    1.40
  -4  -5  -2   60.67    1.37
  -3   0  -5   27.31    0.97
   5  -3   0   25.39    0.47
  -5   3   0   27.53    0.74
   0   5   3   25.36    0.75
   0   5   3   25.01    0.81
   3   0   5   26.33    0.70
   5  -3   0   24.68    0.74
   5   3   0   26.95    0.56
   0  -5  -3   25.53    0.75
  -3   0  -5   30.69    0.77
   0  -5   3   27.13    0.93
   5  -3  -1 1070.61   41.50
  -1  -5   3 1053.96   41.48
  -3   1  -5 1010.87   39.75
   3  -1  -5 1048.48   40.88
   1   5   3 1119.42   43.72
  -3   1  -5 1057.26   40.43
  -5   3  -1 1067.08   41.90
   5   3   1 1068.69   37.68
   3   1   5 1124.39   44.05
   1  -5  -3 1126.88   44.71
  -1   5  -3 1084.65   42.68
   5  -3  -1 1075.74   39.75
  -1   5   3 1052.44   41.03
   5  -3   1 1023.27   39.64
  -3  -1  -5 1181.23   45.69
  -1  -5  -3 1048.85   41.07
  -3  -1  -5  993.09   38.64
   3  -1   5 1027.50   39.87
   5   3  -1 1084.27   40.89
  -1   5   3 1112.04   43.38
   1  -5   3 1070.38   42.17
  -5   3   1 1098.29   43.20
   1   5  -3 1105.03   43.27
  -2  -5   3  355.00   10.47
   2   5   3  336.59    9.83
  -3   2  -5  331.18    9.54
   5  -3  -2  341.32    9.93
   3  -2  -5  363.74   10.51
   3  -2  -5  332.36    9.73
  -5   3  -2  351.48   10.54
   2  -5  -3  364.59   10.71
   5  -3  -2  341.49    9.20
  -2   5  -3  353.71   10.52
   3   2   5  343.46    9.96
  -3   2  -5  337.76    9.76
   5  -3   2  317.82    9.17
   5   3  -2  361.76   10.40
  -2  -5  -3  326.85    9.16
   2  -5   3  340.72   10.18
  -2   5   3  360.07   11.20
   2   5  -3  379.85   11.60
  -5   3   2  358.47   10.89
   3  -2   5  379.66   11.60
  -2   5   3  369.08   11.11
  -3   3  -5  102.70    3.05
   3   5   3   90.61    1.99
  -3   5  -3   96.37    2.58
  -3  -5   3  104.37    3.12
   5  -3  -3  104.28    2.60
  -3   3  -5  102.74    3.05
   3   3   5   96.33    2.47
   5  -3  -3   90.94    2.37
   3  -5  -3   99.39    2.63
   3  -3  -5  100.68    2.51
   3  -3  -5  101.21    3.15
  -5   3  -3   97.22    2.39
   3  -5   3   92.65    2.52
  -3   5   3   95.49    2.52
  -3  -3  -5   92.91    2.26
  -3  -5  -3   98.72    2.35
  -5   3   3   92.90    2.38
   5   3  -3  108.01    2.51
   3   5  -3  100.43    2.48
   3  -3   5  104.78    2.72
   3   3  -5  102.09    3.26
  -3   5   3   98.63    2.35
  -5  -3  -3   98.54    1.75
   5  -3   3   97.34    2.83
   3  -4  -5  601.95   20.41
  -5   3  -4  604.45   18.72
   4  -5  -3  588.54   19.94
   3   4   5  659.93   22.75
   5  -3  -4  565.78   19.11
   5  -3  -4  619.05   20.80
  -4  -5   3  615.56   20.43
   4   5   3  585.47   18.59
  -5   3  -4  609.61   20.96
  -4   5  -3  592.67   21.02
   4  -5  -3  603.50   20.05
   3  -4  -5  626.25   20.89
  -3   4  -5  562.80   19.12
   5   3  -4  592.59   20.49
   3  -4   5  578.44   19.75
  -4  -5  -3  574.16   18.25
  -3   4   5  617.08   20.67
  -3   4   5  586.97   19.89
  -5   3   4  612.33   21.29
   4  -5   3  612.56   21.51
   5  -3   4  613.73   20.98
  -4   5   3  611.27   20.70
   4   5  -3  595.44   19.76
  -5  -3  -4  537.17   16.42
   3   4  -5  597.39   20.30
  -4   5   3  619.00   20.69
  -3  -4  -5  619.47   20.24
   5  -4   0 1094.25   43.99
   4   0   5 1196.02   47.53
  -4   0  -5 1194.75   47.21
   0  -5   4 1122.88   45.70
   0  -5  -4 1141.22   45.61
   0   5  -4 1129.77   45.78
   0   5   4 1216.62   49.25
  -5   4   0 1075.22   43.22
   5   4   0 1162.34   44.44
  -5  -4   0 1119.18   42.41
   0   5   4 1177.68   47.25
  -4   0  -5 1116.15   44.22
  -4   1  -5  588.34   18.97
   1  -5  -4  581.43   19.67
  -1   5  -4  570.61   18.90
   5  -4  -1  558.86   18.30
  -1  -5   4  590.09   19.62
   4  -1  -5  557.64   18.84
  -4   1  -5  561.37   18.38
   1   5   4  548.33   18.09
   5  -4  -1  551.26   16.69
   4   1   5  574.77   18.88
   1   5   4  564.54   18.66
   5   4   1  567.59   16.88
  -5   4  -1  538.87   17.63
   5  -4   1  561.05   18.24
  -1   5   4  588.43   19.89
   1  -5   4  555.17   18.54
  -5  -4  -1  542.55   16.12
  -5   4   1  544.32   17.85
  -4  -1  -5  554.62   17.68
  -1  -5  -4  549.39   17.66
   1   5  -4  574.43   18.98
  -1   5   4  579.48   18.96
   5   4  -1  552.14   17.40
   4  -1   5  567.39   18.18
  -4   2  -5  363.59   10.50
   2   5   4  335.84    9.59
   5  -4  -2  360.05   11.28
   5  -4  -2  360.40   10.08
   2  -5  -4  361.09   11.46
   4   2   5  368.23   11.22
   4  -2  -5  391.15   11.90
   4  -2  -5  337.26   10.07
  -4   2  -5  349.59   10.04
   2   5   4  361.57   10.79
  -5   4  -2  333.13    9.91
  -2  -5   4  385.67   12.27
  -2   5  -4  345.34   10.50
   4  -2   5  362.22   10.58
   5  -4   2  347.63   10.89
  -5  -4  -2  340.30    8.68
   2  -5   4  374.89   12.04
  -2   5   4  357.86   10.72
  -2  -5  -4  350.68   10.40
   2   5  -4  362.54   10.80
  -5   4   2  358.72   11.29
  -2   5   4  371.57   10.93
   5   4  -2  375.46   10.88
   3  -5  -4  954.00   36.47
   3  -5  -4  919.83   35.08
   4   3   5  913.32   34.47
   5  -4  -3  870.25   33.13
   3   5   4  897.52   33.25
  -4   3  -5  946.06   36.41
   4  -3  -5  847.08   32.33
  -4   3  -5  859.18   31.05
  -3   5  -4  932.30   35.64
   5  -4  -3  933.89   34.81
  -5   4  -3  938.39   32.01
  -3  -5   4  919.82   36.06
   4  -3  -5  992.28   38.04
  -5   4  -3  904.60   35.25
  -3   5   4  930.65   35.52
  -3   5   4  980.98   37.72
  -3  -5  -4  919.99   34.08
   5   4  -3  939.17   35.59
   4   3  -5 1001.98   38.85
   5  -4   3  876.85   33.22
  -5  -4  -3  903.53   31.49
   4  -3   5  939.37   35.48
   3  -5   4  906.48   35.71
  -5   4   3  921.05   35.93
   3   5  -4  989.35   38.15
  -4  -3  -5  841.53   30.41
   4  -4  -5 1397.94   61.83
   4  -5  -4 1532.19   66.33
  -5   4  -4 1468.89   65.77
   4   5   4 1596.65   67.40
   4   4   5 1559.80   69.34
  -4   5  -4 1447.19   64.14
   5  -4  -4 1529.59   66.92
   4  -5  -4 1472.82   66.10
  -5   4  -4 1475.45   60.95
   4  -4  -5 1594.48   70.54
   5  -4  -4 1422.40   63.94
  -4   4  -5 1401.94   62.13
  -4   4   5 1480.08   65.41
  -4   5   4 1518.67   67.25
  -4  -4  -5 1397.54   59.08
   4  -5   4 1410.33   62.36
   5   4  -4 1468.79   65.34
   5  -4   4 1418.13   62.33
   4   5  -4 1473.41   64.50
  -5   4   4 1486.78   65.61
  -4   5   4 1502.14   67.54
   4  -4   5 1448.05   63.89
  -5  -4  -4 1502.41   62.42
  -4  -5  -4 1490.21   63.12
   4   4  -5 1438.42   63.52
  -5   5   0 1492.67   62.14
   0   5   5 1522.54   66.85
  -5   0  -5 1454.26   62.30
   5   5   0 1569.04   66.77
  -5   5   0 1521.94   67.15
   5   0  -5 1465.78   64.39
   0  -5  -5 1551.97   68.09
  -5  -5   0 1550.62   66.00
   0   5  -5 1555.49   68.79
   0   5   5 1599.06   70.47
   5  -5   0 1434.18   63.41
   0  -5   5 1450.86   64.80
   5   0   5 1556.18   66.81
   1   5   5  335.28    9.87
   1   5   5  340.10   10.05
   5   1   5  353.85   10.19
  -1   5  -5  345.22   10.87
   5  -5  -1  328.78    9.64
   1  -5  -5  339.72    9.87
  -5  -5   1  319.54    9.07
   5  -1  -5  325.95    9.45
  -5   5  -1  337.00   10.45
   5   5   1  336.64    8.88
  -5   5  -1  293.26    7.22
  -5   1  -5  349.04   10.01
  -1  -5   5  340.45   10.19
  -5  -1  -5  314.08    8.40
  -5   5   1  322.39    8.59
  -5  -5  -1  330.29    8.79
   5   5  -1  333.27    9.38
   1   5  -5  338.20   10.75
   5  -1   5  340.61    9.91
  -5   5   1  329.55    9.67
  -1  -5  -5  345.92   10.23
   1  -5   5  328.05   10.68
   5  -1   5  340.69    9.46
  -1   5   5  332.20    9.68
  -1   5   5  355.42   10.94
   5  -5   1  317.74    9.34
   5  -5  -2   55.14    1.55
  -5   2  -5   64.15    1.49
   5  -2  -5   54.11    1.47
  -5  -5   2   52.57    1.27
  -2   5  -5   60.96    2.14
   2  -5  -5   56.60    1.55
   2  -5  -5   66.14    2.08
  -5   2  -5   60.18    1.45
  -5   5  -2   58.88    2.00
   5   2   5   59.13    1.43
   2   5   5   63.00    2.14
  -2  -5   5   64.42    1.77
   2  -5   5   64.43    2.26
  -2   5   5   53.33    1.49
  -5  -2  -5   67.69    1.42
   5  -5   2   59.85    2.00
  -5  -5  -2   68.97    1.45
  -2   5   5   67.41    2.11
   5  -2   5   69.21    1.96
  -2  -5  -5   53.25    1.29
  -5   5   2   54.54    1.53
   2   5  -5   65.52    1.73
   5   5  -2   66.28    1.70
   3  -5  -5   12.00    0.90
   5  -5  -3   11.15    0.87
   3   5   5   14.93    0.90
   5  -3  -5   13.70    0.56
  -5   5  -3   14.09    0.86
   5  -3  -5   13.45    0.73
  -3   5  -5   13.29    0.94
  -5   3  -5   11.79    0.41
  -5   3  -5   14.71    0.52
   3  -5  -5   13.13    0.80
  -3  -5   5   10.49    0.60
   5   3  -5   12.13    0.55
   5  -5   3   12.19    0.87
  -5  -5  -3   12.91    0.34
   3  -5   5   17.13    0.99
  -3   5   5   11.20    0.88
  -5   5   3   11.48    0.57
  -3   5   5   12.09    0.78
  -5  -3  -5   11.26    0.34
  -3  -5  -5   11.33    0.53
   5   5  -3   11.89    0.66
   5  -3   5   12.18    0.80
  -5   5  -4  546.81   18.76
   4   5   5  517.82   17.16
   5  -5  -4  550.80   17.45
   4  -5  -5  501.19   16.75
   5  -4  -5  524.19   18.04
  -5   4  -5  566.73   19.23
  -4   5  -5  557.79   19.13
  -5   4  -5  519.31   15.83
   5  -4  -5  575.82   19.04
   5   4   5  516.93   17.02
   4  -5  -5  555.59   17.93
   5  -5  -4  506.50   16.87
  -5   5   4  528.53   17.64
  -5  -5  -4  521.99   15.79
   4   5  -5  553.08   18.85
   5  -4   5  532.06   18.15
   5  -5   4  539.11   18.42
   4  -5   5  527.75   17.57
  -5   4   5  528.47   17.61
  -4  -5  -5  494.83   15.33
   5   4  -5  536.82   17.62
   5   5  -4  519.64   16.94
  -4   5   5  533.01   17.80
  -5  -4  -5  522.85   15.93
  -5   5  -5  435.47   14.49
   5  -5  -5  437.92   13.88
   5  -5  -5  451.96   13.77
  -5   5  -5  408.15   11.73
  -5   5   5  440.87   14.07
   5  -5   5  424.53   14.16
   5   5  -5  430.68   13.49
  -5  -5  -5  408.59   11.93
  -6   0   0 1229.09   49.07
   0  -6   0 1329.94   55.82
   0   6   0 1202.03   50.92
   0   0  -6 1257.39   51.89
   6   0   0 1255.75   49.95
   0   1  -6  603.47   20.69
  -6   0  -1  656.68   20.77
   6   0  -1  613.92   20.17
  -1   6   0  617.61   21.01
   0  -1  -6  673.37   22.67
   1  -6   0  623.04   21.18
   6   0   1  632.68   20.06
  -1  -6   0  650.22   22.46
   1   6   0  697.95   23.88
   2  -6   0   78.33    2.65
   6   0   2   80.96    1.84
  -6   0  -2   79.67    1.64
   2   6   0   78.90    1.89
  -2  -6   0   84.39    2.41
   6   0  -2   76.72    1.97
   0  -2  -6   88.36    2.74
   0   2  -6   77.86    2.63
  -2   6   0   74.91    2.01
   0   2   6   83.50    2.14
   6   0  -3  382.08   11.52
   6   0   3  338.17    9.55
   0   3   6  421.89   12.72
   0  -3  -6  400.99   12.46
  -3  -6   0  394.52   11.44
   0   3  -6  397.53   12.78
   3   6   0  400.29   12.03
  -6   0  -3  369.23   10.29
   6   0   3  394.54   10.93
   0  -3  -6  404.65   12.25
   3  -6   0  397.19   12.06
  -3   6   0  384.97   11.73
   6   0   4  877.41   32.20
   0  -4  -6  971.12   36.75
   0  -4   6  929.96   35.55
   0   4   6  980.33   37.90
  -6   0  -4  950.61   34.25
  -4   6   0  974.85   35.14
   4   6   0  878.82   32.82
   6   0  -4  868.04   32.39
   0   4  -6  866.39   33.92
  -4  -6   0  880.77   32.30
   0  -4  -6  983.37   37.44
   6   0   4  909.85   32.85
   4  -6   0  876.15   34.26
  -4   6   0  847.58   32.39
   0  -5  -6  862.59   32.53
   5   6   0  931.59   33.98
   0  -5   6  867.85   33.40
   0   5  -6  973.91   37.61
  -6   0  -5  930.81   33.87
   5  -6   0  862.04   32.75
  -5  -6   0  858.16   31.04
   0   5   6  931.90   35.22
  -5   6   0  915.29   32.35
   6   0  -5  844.86   31.69
  -5   6   0  852.89   32.49
   6   0   5  861.65   31.73
   0  -6   1   11.52    0.56
   0   6  -1    9.34    0.52
  -1   0  -6   10.74    0.48
   6  -1   0   11.60    0.52
  -6   1   0    8.85    0.46
   0  -6  -1   10.71    0.50
   0   6   1    9.56    0.49
   6   1   0    8.79    0.31
  -1   1  -6  920.21   33.63
  -1  -6   1  826.45   30.06
   1   6   1  814.17   29.40
  -1   6  -1  805.39   29.60
   6   1   1  801.41   26.78
  -1   1  -6  850.73   31.00
   1  -1  -6  889.88   32.33
  -6   1  -1  833.73   29.46
   1  -6  -1  805.27   29.41
   6  -1  -1  809.57   29.17
   6   1  -1  813.12   28.39
   1   6  -1  813.14   29.70
  -6   1   1  850.09   30.56
   6  -1   1  805.09   28.58
  -1  -1  -6  857.41   31.19
   1  -6   1  816.55   29.93
  -1   6   1  866.79   32.31
  -1  -6  -1  840.79   30.25
  -2   6  -1  399.25   12.88
   2   6   1  397.11   11.58
   1   2   6  425.13   12.78
   1  -2  -6  420.60   12.65
   2  -6  -1  414.00   12.50
  -1   2  -6  388.88   11.84
  -2  -6   1  395.03   11.76
   1  -2  -6  408.96   12.22
   6  -1  -2  390.26   11.35
  -6   1  -2  394.14   11.30
   6   1   2  368.14    9.58
   2  -6   1  391.73   11.98
   2   6  -1  379.83   11.33
   6   1  -2  381.54   11.13
  -1  -2  -6  439.39   13.21
  -6   1   2  395.81   11.49
   1   2  -6  398.80   12.23
  -6  -1  -2  409.20   10.63
   6  -1   2  379.06   11.02
  -2  -6  -1  394.98   12.05
  -2   6   1  390.89   11.90
  -3  -6   1  246.14    6.86
   1  -3  -6  244.54    6.65
   1  -3  -6  231.80    6.76
  -3   6  -1  228.91    6.35
   3  -6  -1  221.31    6.13
  -1   3  -6  220.89    6.71
   6  -1  -3  221.99    6.22
  -6   1  -3  228.94    5.89
   1   3   6  244.09    6.65
   3   6   1  220.81    5.97
  -3   6   1  238.11    6.31
   6  -1   3  225.98    5.86
  -6  -1  -3  216.91    4.93
  -3  -6  -1  234.79    5.95
   6  -1   3  214.74    5.24
   3   6  -1  227.94    5.98
  -1   3   6  250.04    7.33
   6   1  -3  224.75    6.04
   3  -6   1  230.00    6.99
  -1  -3  -6  232.64    6.49
   1  -3   6  226.73    6.39
  -1  -3  -6  243.27    7.32
  -3   6   1  216.06    6.65
   1   3  -6  223.92    6.34
  -1   4  -6  459.15   14.75
   6   1   4  478.90   14.84
   4  -6  -1  485.61   16.18
   1  -4  -6  485.99   15.49
  -6   1  -4  470.79   14.13
   1   4   6  490.98   16.37
   4   6   1  455.24   13.99
   6  -1  -4  466.10   14.58
   1  -4  -6  480.64   15.20
  -4   6  -1  474.23   15.18
  -4  -6   1  478.20   14.68
  -1   4   6  496.81   15.84
  -1  -4  -6  467.06   14.57
   4  -6   1  457.87   15.45
  -4   6   1  477.84   15.27
  -4   6   1  483.52   14.77
  -6  -1  -4  474.59   13.67
   1   4  -6  480.67   15.47
   6  -1   4  486.86   14.38
   6  -1   4  457.05   14.12
  -4  -6  -1  469.77   14.07
   1  -4   6  493.85   16.84
   4   6  -1  454.21   14.48
   5  -6  -1  808.29   29.72
  -1   5  -6  789.87   29.14
   1   5   6  802.51   29.57
  -5   6  -1  820.17   30.86
   6  -1  -5  770.73   28.71
   5   6   1  765.01   26.48
   6   1   5  818.38   29.39
  -5  -6   1  805.01   28.53
  -1  -5   6  823.02   31.49
  -6   1  -5  814.85   29.18
   1  -5  -6  804.47   29.46
   1  -5  -6  824.57   30.25
  -5   6  -1  839.94   28.20
  -5  -6  -1  820.87   28.66
   5  -6   1  797.22   29.24
  -1  -5  -6  812.99   29.47
   1   5  -6  787.40   29.15
  -1   5   6  835.79   30.64
  -5   6   1  800.12   29.45
   5   6  -1  804.57   28.89
  -6  -1  -5  806.15   27.90
  -1   5   6  796.91   29.17
   6  -1   5  768.80   27.01
   1  -5   6  748.71   29.05
  -5   6   1  858.66   29.79
   6  -1   5  784.03   27.75
   0   6   2  190.52    4.91
   6  -2   0  184.94    4.92
   0   6  -2  189.89    5.70
   6   2   0  183.23    4.02
  -2   0  -6  199.16    5.51
  -6   2   0  190.69    4.67
  -2   0  -6  187.85    5.32
   0  -6  -2  189.60    4.90
   0  -6   2  199.82    5.92
  -2   1  -6  490.87   15.14
  -6   2  -1  480.40   15.04
   1   6   2  489.42   15.72
   1  -6  -2  505.67   16.56
  -1   6  -2  501.10   16.00
   2  -1  -6  525.25   16.50
   6  -2  -1  475.45   14.67
  -2   1  -6  476.25   15.01
  -1  -6   2  480.75   15.31
   2   1   6  505.98   16.48
   1  -6   2  475.63   15.28
   1   6  -2  490.79   15.61
  -6   2   1  525.80   16.48
  -1   6   2  493.47   15.60
   6   2  -1  459.96   13.59
   6  -2   1  498.49   15.58
  -2  -1  -6  519.50   17.01
  -1  -6  -2  471.62   14.67
   2  -6  -2  449.13   14.53
  -2   2  -6  410.01   12.75
   2   6   2  417.17   12.92
   2  -2  -6  447.93   13.77
   2  -2  -6  448.84   14.41
   6  -2  -2  393.45   11.94
  -6   2  -2  412.52   12.61
  -2  -6   2  459.58   14.68
  -2   6  -2  432.91   13.54
   2   2   6  436.99   13.41
  -2   2  -6  426.12   13.73
  -2  -2  -6  466.50   14.32
  -6   2   2  402.41   12.20
   2   6  -2  409.85   12.62
   2   2  -6  459.02   15.09
  -2   6   2  405.08   12.64
   2  -6   2  420.67   13.15
  -2  -6  -2  434.49   13.36
   6  -2   2  390.85   11.57
   6  -2   2  383.34   10.30
  -2   6   2  422.31   12.69
   2   3   6 1211.50   48.80
  -3   6  -2 1107.03   45.20
  -6   2  -3 1147.32   45.24
   6  -2  -3 1171.52   46.80
  -3  -6   2 1180.28   47.31
   3  -6  -2 1160.07   46.94
   2  -3  -6 1228.43   50.43
   3   6   2 1123.02   44.70
   2  -3  -6 1175.55   47.50
  -2   3  -6 1102.17   44.68
  -3   6   2 1185.01   47.61
  -2  -3  -6 1170.51   46.44
  -3   6   2 1173.74   47.63
  -6   2   3 1156.54   46.37
   3   6  -2 1129.24   45.42
   2  -3   6 1136.67   46.44
  -2  -3  -6 1251.62   50.60
   2   3  -6 1086.82   44.55
  -3  -6  -2 1156.05   45.87
   3  -6   2 1079.55   44.05
   6  -2   3 1101.06   41.32
   6  -2   3 1160.75   46.38
  -4  -6   2 1245.87   52.30
   2  -4  -6 1221.20   51.12
  -4   6  -2 1240.35   53.11
  -2   4  -6 1185.74   49.68
   4  -6  -2 1248.51   53.11
   2   4   6 1249.18   52.17
  -6   2  -4 1263.49   52.24
   2  -4  -6 1353.43   57.16
   4   6   2 1239.23   50.15
  -2   4   6 1296.37   54.17
   6  -2   4 1240.37   51.25
   4  -6   2 1214.28   50.79
  -6  -2  -4 1286.14   49.33
   4   6  -2 1222.25   50.44
  -4   6   2 1365.69   55.95
   2   4  -6 1237.72   52.92
  -4  -6  -2 1268.35   51.28
   2  -4   6 1202.06   51.91
  -4   6   2 1210.27   50.78
  -2  -4  -6 1221.88   50.25
   5  -6  -2   40.95    1.55
  -2  -5   6   41.64    1.26
   6  -2  -5   37.68    1.06
   5   6   2   40.35    0.90
   2   5   6   41.63    1.19
  -5  -6   2   44.10    1.04
  -2   5  -6   41.53    1.63
   6   2   5   43.53    1.23
  -5   6  -2   38.56    1.15
  -6   2  -5   42.08    1.24
   2  -5  -6   39.35    1.52
  -2   5   6   41.27    1.18
  -5   6   2   36.54    1.53
  -5   6   2   41.43    1.02
  -5  -6  -2   43.27    0.96
   6  -2   5   41.31    1.29
  -6  -2  -5   42.98    0.84
  -2  -5  -6   39.34    1.22
   2  -5   6   42.65    1.76
   5  -6   2   37.51    1.13
  -2   5   6   42.24    1.16
   5   6  -2   42.45    1.22
   2   5  -6   41.91    1.23
   6   3   0  482.15   13.74
   6  -3   0  458.78   14.35
  -6   3   0  490.15   15.76
   0  -6  -3  493.27   16.12
   0   6   3  503.52   16.40
   0   6  -3  500.55   16.81
   6  -3   0  436.64   12.10
   0  -6   3  505.89   16.20
  -3   0  -6  460.02   14.30
  -3   0  -6  494.90   15.42
   3   0   6  505.06   15.65
  -3   1  -6  628.88   21.04
  -1   6  -3  623.90   21.71
   1   6   3  641.18   22.20
  -1  -6   3  661.59   22.74
   3   1   6  687.17   23.84
  -3   1  -6  654.12   22.63
   1  -6  -3  671.28   23.58
   6  -3  -1  622.91   21.79
   6  -3  -1  610.87   19.36
  -6   3  -1  587.47   19.85
   1  -6   3  661.93   23.73
   1   6  -3  667.51   22.93
   6   3  -1  634.82   20.63
   6  -3   1  655.69   22.56
  -6   3   1  656.62   22.74
  -1  -6  -3  606.37   20.48
  -1   6   3  626.75   22.08
  -1   6   3  623.48   21.40
  -3  -1  -6  683.49   23.19
  -3  -1  -6  622.11   21.41
   3  -2  -6  188.88    5.05
   3   2   6  201.94    5.29
  -2  -6   3  199.02    5.96
   6  -3  -2  197.27    4.81
   6  -3  -2  190.56    4.99
  -3   2  -6  193.17    4.80
  -3   2  -6  198.41    5.63
  -6   3  -2  192.64    5.31
  -2   6  -3  200.84    6.12
   2   6   3  201.75    5.38
   3  -2  -6  206.79    5.95
   2  -6  -3  194.87    5.24
  -6   3   2  192.93    5.05
   6  -3   2  196.81    5.00
  -3  -2  -6  217.28    5.75
   6   3  -2  195.15    5.06
   3  -2   6  191.11    5.15
   2   6  -3  202.78    5.38
  -2   6   3  199.17    5.87
   2  -6   3  192.36    5.30
  -2   6   3  195.56    5.08
  -2  -6  -3  192.08    5.19
   6  -3  -3  321.46    9.03
  -3  -6   3  335.33   10.31
   3  -3  -6  336.62    9.71
   3   3   6  332.11   10.16
   3  -6  -3  315.93    9.94
   3   6   3  311.28    8.85
   6  -3  -3  324.05    9.80
   3  -3  -6  330.43    9.64
  -6   3  -3  328.63    9.70
  -3   3  -6  308.98    8.80
  -3   6  -3  338.56   10.61
  -3   3  -6  312.52    9.65
  -3  -6  -3  308.21    8.76
   3   3  -6  314.19    9.42
   3   6  -3  331.17    9.52
   3  -3   6  320.65   10.18
  -3  -3  -6  322.15    9.14
  -3   6   3  325.16    9.60
  -6   3   3  328.39    9.46
   6  -3   3  304.91    9.12
   6   3  -3  340.45    9.81
   3  -6   3  331.71   10.37
  -3   6   3  351.01   10.25
   6  -3  -4  413.09   12.57
   3  -4  -6  438.98   13.35
   6  -3  -4  382.75   12.33
  -6   3  -4  394.09   11.92
  -3   4  -6  422.61   13.62
   4  -6  -3  396.67   12.99
   4   6   3  386.88   11.36
   3   4   6  405.29   12.51
   3  -4  -6  420.68   12.99
  -4  -6   3  407.33   13.04
  -4   6  -3  401.15   12.55
  -3  -4  -6  435.31   12.96
   6  -3   4  406.85   12.18
  -4   6   3  415.75   12.94
  -6   3   4  409.01   12.55
  -6  -3  -4  376.00    9.78
  -6  -3  -4  390.73   10.17
   3   4  -6  424.18   13.20
  -4   6   3  415.89   12.33
  -4  -6  -3  407.38   11.88
   3  -4   6  410.52   13.57
   4   6  -3  432.19   13.46
   6   3  -4  403.90   12.64
   4  -6   3  385.02   12.03
   5   6   3   30.87    0.67
   6  -3  -5   27.66    0.86
   6  -3  -5   28.26    0.75
   3  -5  -6   27.41    0.92
  -5  -6   3   27.07    1.03
   3   5   6   25.44    1.22
   6   3   5   27.61    1.02
   5  -6  -3   26.50    0.89
   3  -5  -6   28.28    1.17
  -5   6  -3   27.54    0.91
  -6   3  -5   28.58    1.06
  -3   5  -6   27.65    1.25
  -6  -3  -5   31.06    0.56
  -6  -3  -5   27.92    0.62
   6  -3   5   33.05    0.83
  -3   5   6   25.51    0.86
   5   6  -3   27.10    1.00
  -3  -5  -6   26.95    0.85
   3  -5   6   26.49    0.94
   6   3  -5   24.79    0.79
   3   5  -6   27.41    1.28
   5  -6   3   27.11    0.88
  -3   5   6   28.76    0.87
  -5   6   3   27.37    0.90
  -5   6   3   27.99    0.83
   4   0   6  881.30   33.00
   0   6  -4  858.76   32.62
  -6   4   0  842.25   32.11
   6   4   0  936.09   32.90
   0  -6   4  865.49   32.82
   0   6   4  922.75   35.03
   6  -4   0  852.95   31.83
  -4   0  -6  971.68   36.41
  -4   0  -6  854.97   31.28
   0   6   4  909.69   34.05
   0  -6  -4  873.47   33.35
   6  -4  -1   98.28    2.93
  -4   1  -6  107.09    2.46
  -6   4  -1   95.41    2.40
   6   4   1   94.96    1.77
  -4   1  -6  113.95    2.95
   1   6   4  100.87    2.62
   4  -1  -6   90.54    2.36
  -1  -6   4  109.16    3.41
  -1   6  -4  102.38    2.76
   4   1   6  102.48    2.45
   1  -6  -4  102.86    2.63
   1   6   4  100.39    2.78
   6  -4  -1  100.76    2.06
  -1   6   4  103.86    2.63
  -6   4   1   91.82    2.35
  -1  -6  -4  102.56    2.48
   1   6  -4  114.00    3.39
  -1   6   4   97.88    2.98
   6  -4   1  101.16    2.96
  -4  -1  -6  108.63    2.68
   6   4  -1  113.18    2.50
   1  -6   4  112.56    2.92
  -2  -6   4 1266.29   53.82
   6  -4  -2 1286.24   52.05
   2  -6  -4 1338.32   57.35
  -6   4  -2 1323.72   56.20
  -4   2  -6 1258.94   51.66
   4   2   6 1303.95   54.49
  -2   6  -4 1319.87   55.94
   2   6   4 1276.19   53.75
   6  -4  -2 1319.02   56.21
   4  -2  -6 1249.64   52.70
   4  -2  -6 1387.14   59.12
  -4   2  -6 1266.18   53.80
  -2   6   4 1341.10   56.39
   2   6  -4 1405.13   60.11
  -6   4   2 1300.30   54.70
   6  -4   2 1323.42   55.25
   2  -6   4 1229.60   52.27
  -2  -6  -4 1310.61   54.95
  -4  -2  -6 1135.18   46.67
  -2   6   4 1315.11   56.46
   6   4  -2 1342.36   55.21
   4  -2   6 1281.62   53.88
   4  -3  -6   70.09    2.08
  -4   3  -6   69.41    2.05
  -6   4  -3   65.18    1.60
  -4   3  -6   60.51    1.47
  -3   6  -4   67.24    2.28
  -3  -6   4   63.95    1.72
   6  -4  -3   67.02    1.58
   4   3   6   66.78    2.04
   6  -4  -3   65.17    1.68
   3   6   4   64.64    1.40
   3  -6  -4   67.63    2.24
   4  -3  -6   61.84    2.04
  -3   6   4   68.28    1.98
   6   4  -3   66.98    1.52
   6  -4   3   64.28    1.59
   4  -3   6   58.80    1.60
   3   6  -4   64.56    2.03
   3  -6   4   58.39    2.15
  -6   4   3   63.86    2.03
  -3  -6  -4   67.28    1.45
   4   3  -6   61.84    1.72
  -4  -3  -6   64.88    1.33
   4  -6  -4   20.97    0.80
  -4  -6   4   22.90    0.76
  -4   6  -4   19.90    0.77
   4   4   6   20.60    0.73
   4  -4  -6   22.23    0.72
  -4   4  -6   22.50    1.05
   4  -4  -6   19.71    0.74
   6  -4  -4   21.51    0.77
  -6   4  -4   22.43    1.01
   6  -4  -4   19.60    1.05
   4   6   4   20.70    0.61
  -6   4   4   20.13    1.03
  -4  -4  -6   19.31    0.62
   4   6  -4   21.02    0.70
   4  -6   4   21.67    0.81
   6  -4   4   21.25    0.69
  -4   6   4   20.15    0.63
   4  -4   6   23.43    0.82
  -4  -6  -4   20.12    0.62
  -6  -4  -4   22.02    0.37
   4   4  -6   22.49    0.81
  -6  -4  -4   23.54    0.40
  -4   6   4   21.12    1.13
   6   4  -4   22.39    0.66
   4  -5  -6  842.02   31.19
  -6   4  -5  860.82   32.54
   6   4   5  827.68   30.61
  -4   5  -6  866.37   33.16
   5  -6  -4  845.08   32.47
   6  -4  -5  865.15   32.09
   6  -4  -5  821.54   31.46
  -5   6  -4  870.37   32.62
   4  -5  -6  843.18   31.64
   4   5   6  835.99   31.22
  -6   4  -5  856.16   29.79
   5  -6  -4  863.37   31.24
   5   6   4  820.39   28.84
   4  -5   6  820.99   31.72
   5   6  -4  818.64   30.94
  -5   6   4  870.19   32.32
  -4  -5  -6  832.72   29.71
  -5   6   4  835.40   31.45
   5  -6   4  789.54   29.71
   6   4  -5  799.54   30.40
  -5  -6  -4  786.78   27.78
   4   5  -6  799.51   30.04
  -6  -4  -5  782.85   26.79
   6  -4   5  854.16   32.21
  -6   4   5  846.93   32.46
  -6  -4  -5  822.58   28.15
  -4   5   6  832.35   32.11
  -6   5   0  471.87   14.89
   6  -5   0  449.84   14.21
   0   6  -5  486.14   16.22
   5   0   6  472.55   14.33
   0   6   5  491.11   15.50
   0  -6   5  455.08   14.80
   6   5   0  454.64   13.33
  -5   0  -6  453.19   13.66
   0  -6  -5  452.92   14.73
   0   6   5  466.40   14.65
  -6   5  -1    0.81    0.22
   1  -6  -5    1.03    0.38
   5  -1  -6    0.39    0.37
  -1  -6   5    0.93    0.50
   1   6   5    0.88    0.42
   5   1   6    0.85    0.18
   6  -5  -1    0.55    0.24
  -5   1  -6    1.11    0.27
   1   6   5    0.88    0.19
  -5   1  -6    1.62    0.17
  -1   6  -5    1.00    0.28
   6   5   1    0.93    0.10
  -6  -5  -1    1.02    0.11
   1  -6   5    0.33    0.50
   5  -1   6    0.03    0.18
   6   5  -1    0.67    0.20
   6  -5   1    0.93    0.39
  -6   5   1    0.54    0.23
  -1   6   5    0.68    0.39
  -5  -1  -6    0.95    0.22
   2  -6  -5 1339.79   57.88
   2   6   5 1252.09   53.46
  -6   5  -2 1317.73   56.79
   6  -5  -2 1258.43   54.58
   5   2   6 1291.81   54.40
  -5   2  -6 1350.46   56.00
  -2   6  -5 1330.40   57.95
   6  -5  -2 1256.78   51.25
   5  -2  -6 1388.45   59.65
  -5   2  -6 1268.39   54.20
   6   5   2 1185.22   46.31
   5  -2  -6 1256.15   53.42
  -2  -6   5 1334.17   58.17
  -2   6   5 1402.94   60.33
   6   5  -2 1330.74   55.30
  -2   6   5 1324.63   56.47
   2   6  -5 1372.64   59.36
  -6  -5  -2 1349.61   52.91
   6  -5   2 1291.25   54.75
   2  -6   5 1293.09   56.39
  -5  -2  -6 1296.74   53.44
  -6   5   2 1334.14   57.61
  -2  -6  -5 1302.06   55.32
   5  -2   6 1345.06   57.43
   6  -5  -3  139.82    4.23
  -6   5  -3  153.85    4.02
   5  -3  -6  157.21    3.98
   5   3   6  153.33    4.28
   3   6   5  146.61    3.94
   5  -3  -6  142.70    3.80
   6  -5  -3  148.91    3.65
   3   6   5  150.02    3.81
  -5   3  -6  155.22    4.28
  -5   3  -6  141.62    3.46
  -3  -6   5  153.17    4.65
  -3   6  -5  143.57    3.89
   6   5  -3  159.86    4.12
  -3   6   5  146.83    3.95
  -3  -6  -5  155.01    3.93
  -6  -5  -3  150.18    3.11
  -6   5   3  148.98    3.96
   5  -3   6  147.35    4.28
   3  -6   5  146.27    3.99
   5   3  -6  153.69    4.04
   3   6  -5  154.33    4.07
   6  -5   3  150.64    4.34
  -3   6   5  159.11    4.52
  -5   4  -6  926.25   34.52
  -6   5  -4  939.66   32.99
   4  -6  -5  960.39   37.71
   4  -6  -5  960.96   36.96
  -6   5  -4  990.38   39.33
   6  -5  -4  958.06   37.46
   5   4   6  949.09   37.72
   5  -4  -6 1038.10   39.96
   5  -4  -6  957.40   37.49
  -4   6  -5 1012.65   39.69
  -5   4  -6  946.23   36.91
   6  -5  -4  997.96   37.63
   4   6  -5  979.54   38.16
  -6   5   4  962.08   37.79
  -4  -6  -5  925.07   34.98
  -5  -4  -6  960.67   35.69
   4  -6   5 1013.27   40.41
  -4   6   5 1022.14   40.78
   6   5  -4  956.52   36.76
   5   4  -6  889.37   35.04
   6  -5   4  920.44   35.92
  -4   6   5 1027.06   40.43
   5  -4   6  978.84   38.90
  -6  -5  -4 1001.04   35.70
  -5   6  -5  291.39    9.40
   5   5   6  302.90    9.60
  -5   5  -6  314.85    9.85
   6  -5  -5  290.12    8.73
   5  -5  -6  297.02    9.51
  -5   5  -6  284.63    7.73
   6  -5  -5  310.95    9.16
  -6   5  -5  310.69    9.13
  -6   5  -5  293.14    7.61
   5  -5  -6  316.20    9.08
   5  -6  -5  299.89    8.96
   5  -6  -5  279.05    9.12
   5  -6   5  289.87    9.39
  -5  -6  -5  302.31    8.18
  -5   6   5  299.84    9.05
   6  -5   5  308.00    9.63
  -5  -5  -6  319.36    8.64
   5   6  -5  306.13    8.93
   5   5  -6  302.82    9.53
   5  -5   6  302.57    9.05
  -5   5   6  295.02    8.96
   6   5  -5  306.31    8.88
  -6   5   5  302.92    9.69
  -6  -5  -5  291.09    7.63
   6   6   0 1386.01   57.23
   6   0  -6 1326.68   57.40
   0   6  -6 1295.65   56.21
   0  -6  -6 1375.19   59.54
   6   0   6 1332.10   55.66
   0  -6   6 1282.27   57.10
   0   6   6 1362.33   59.51
   6  -6   0 1280.40   56.20
  -6   6   0 1282.48   56.20
  -6  -6   0 1288.20   53.34
  -6   0  -6 1414.86   59.00
   0   6   6 1332.24   57.74
   6  -6  -1 2077.78  101.75
  -6   6  -1 1956.74   96.20
   1   6   6 2023.92   99.43
   1   6   6 2012.81   98.24
   1  -6  -6 2047.64  101.44
  -1   6  -6 2030.54  101.10
   6   1   6 2016.09   97.44
   6  -1  -6 2024.68   99.95
   6   6   1 2126.99   99.73
  -6   1  -6 1969.80   95.81
  -1  -6   6 1962.92   97.41
  -6  -6   1 1933.67   93.09
  -1   6   6 2056.83  100.83
   1   6  -6 1965.60   96.99
  -1  -6  -6 2067.34  100.87
   6  -1   6 2052.02   98.81
  -1   6   6 2192.17  108.49
  -6  -1  -6 2017.27   96.13
   6   6  -1 1986.51   95.53
   6  -6   1 1960.61   97.33
  -6   6   1 2098.57  103.99
  -6  -6  -1 2144.28  101.46
   6  -1   6 1982.00   96.30
   1  -6   6 2076.88  103.98
   6   6   2  140.70    3.01
   6   2   6  133.75    3.64
   6  -6  -2  133.62    3.57
   2   6   6  128.81    3.52
  -2  -6   6  140.77    4.47
  -6   2  -6  142.91    3.50
   2  -6  -6  136.71    4.09
  -2   6  -6  135.54    3.68
   6  -2  -6  131.68    3.47
  -6   6  -2  133.05    4.03
  -2   6   6  132.75    3.98
   6   6  -2  140.22    3.55
   2   6  -6  134.28    4.19
  -6   6   2  134.24    3.62
  -2   6   6  142.13    4.18
   6  -6   2  138.34    4.07
  -2  -6  -6  133.37    3.31
  -6  -6  -2  150.12    3.22
  -6  -2  -6  140.92    3.20
   2  -6   6  134.28    4.36
   6  -2   6  145.15    3.57
   3  -6  -6 1305.31   55.48
   6   6   3 1290.74   50.67
   6  -3  -6 1222.76   52.74
   6   3   6 1297.08   55.09
  -6   6  -3 1248.37   54.15
   6  -3  -6 1346.60   57.31
  -3   6  -6 1309.39   56.72
   6  -6  -3 1234.84   52.46
  -6   3  -6 1205.05   51.68
  -3  -6   6 1250.79   53.43
  -6   3  -6 1290.62   52.51
   3  -6  -6 1269.15   53.54
   3   6   6 1206.32   51.37
   6  -6   3 1183.71   50.51
   3   6  -6 1255.74   53.38
  -3   6   6 1261.66   53.77
  -3   6   6 1316.27   55.84
  -3  -6  -6 1296.53   54.25
  -6   6   3 1268.92   53.98
  -6  -3  -6 1241.52   50.14
   6   3  -6 1204.93   51.28
   6   6  -3 1283.17   54.00
  -6  -3  -6 1277.34   51.72
   6  -3   6 1274.49   53.58
  -6  -6  -3 1331.76   52.87
   3  -6   6 1185.67   50.97
   6  -4  -6    2.13    0.40
  -6   4  -6    1.79    0.28
   4  -6  -6    2.50    0.44
  -6   6  -4    2.22    0.11
   6  -6  -4    2.51    0.31
   4   6   6    3.07    0.53
   6  -4  -6    1.82    0.53
   6  -6  -4    1.69    0.33
   4  -6  -6    2.53    0.56
   6   4   6    2.27    0.30
  -4   6  -6    1.98    0.34
  -6   4  -6    2.51    0.19
  -6   6  -4    2.14    0.31
  -4   6   6    1.89    0.34
   4  -6   6    2.13    0.58
  -6  -4  -6    2.35    0.19
   6  -6   4    1.87    0.32
   4   6  -6    2.04    0.50
   6   6  -4    2.34    0.39
   6   4  -6    2.42    0.30
  -6   6   4    1.80    0.33
   6  -4   6    2.88    0.47
  -6  -6  -4    1.89    0.16
  -4   6   6    2.12    0.45
  -4  -6  -6    2.16    0.28
   6  -6  -5  955.34   37.85
   6   5   6  988.11   39.63
   6  -5  -6  928.27   37.87
  -6   6  -5  983.89   35.48
  -6   6  -5 1023.58   41.31
   6  -5  -6 1005.94   39.68
   5  -6  -6  919.98   36.65
   5   6   6  976.54   38.58
  -6   5  -6  952.28   37.66
   6  -6  -5  982.80   37.76
  -6   5  -6  877.56   32.52
  -5   6  -6 1003.29   39.75
   5  -6  -6 1009.09   39.22
  -6   6   5  995.99   40.42
  -5   6   6 1025.11   41.58
   6   6  -5  951.53   37.24
   6   5  -6  926.99   37.48
   5   6  -6  921.68   36.51
   6  -6   5  994.46   39.94
  -5  -6  -6  939.03   35.49
  -6  -5  -6 1024.99   37.60
  -6  -6  -5  957.50   35.16
  -6   5   6  963.28   38.35
   5  -6   6  965.85   39.22
   6  -5   6  940.97   37.17
   6  -6  -6    2.01    0.47
  -6   6  -6    2.41    0.62
   6  -6  -6    3.68    0.42
   6   6   6    1.79    0.40
  -6   6  -6    3.04    0.20
  -6  -6  -6    1.64    0.22
   6   6  -6    2.59    0.34
   6  -6   6    1.98    0.62
   0   7   0   13.26    0.87
   0   0  -7   14.21    0.58
   7   0   0   11.67    0.45
  -1  -7   0 1701.89   79.37
   0   1  -7 1624.23   75.37
   7   0  -1 1760.85   79.28
   1  -7   0 1735.01   81.30
   1   7   0 1680.91   77.53
   7   0   1 1718.17   75.98
  -1   7   0 1695.83   78.44
   0  -1  -7 1881.95   87.39
  -7   0  -1 1793.77   79.29
  -2  -7   0  169.53    4.76
   0   2  -7  162.78    4.37
   7   0   2  159.20    3.63
   7   0  -2  155.16    4.00
   2  -7   0  153.60    4.14
  -7   0  -2  155.24    3.51
   2   7   0  169.09    4.68
   0  -2  -7  172.07    4.51
  -2   7   0  165.60    4.98
   0  -3  -7  831.05   30.81
  -7   0  -3  749.18   25.29
   7   0   3  760.30   25.68
   0   3  -7  737.74   27.87
  -3   7   0  743.56   27.94
   3  -7   0  758.89   27.56
   0  -3  -7  777.21   27.89
   0   3   7  825.46   29.82
  -3  -7   0  804.10   29.01
   7   0  -3  752.03   26.49
   3   7   0  754.07   27.39
  -4  -7   0  869.27   32.11
   4  -7   0  827.29   31.15
  -4   7   0  814.58   30.79
  -4   7   0  880.07   31.27
   7   0   4  914.10   32.61
   0   4  -7  786.21   29.74
   0   4   7  905.23   34.67
  -7   0  -4  817.68   28.94
   0  -4  -7  929.29   35.57
   7   0   4  824.59   29.16
   7   0  -4  836.15   30.71
   4   7   0  855.65   31.56
   0  -4  -7  898.42   33.84
   5  -7   0  235.47    7.20
   7   0  -5  223.79    6.42
   0  -5   7  228.69    6.64
  -5   7   0  221.48    6.31
  -7   0  -5  226.95    5.82
   0  -5  -7  249.88    7.00
  -5  -7   0  230.43    5.92
   5   7   0  220.65    5.91
   0   5   7  235.34    6.63
   0  -5  -7  226.84    6.65
   7   0   5  228.95    5.94
  -5   7   0  252.18    6.23
   0   5  -7  219.73    6.25
   7   0   6  284.88    7.72
   6  -7   0  277.33    8.08
  -6   7   0  267.35    7.85
   0  -6   7  283.90    8.50
  -7   0  -6  280.05    7.55
   0   6  -7  260.09    8.36
   0  -6  -7  271.68    7.76
   6   7   0  266.15    7.00
  -6   7   0  267.37    6.69
   7   0  -6  266.67    7.57
  -6  -7   0  271.64    7.42
   0   6   7  269.82    7.90
   0  -7   1   99.94    2.58
   0   7   1   91.73    2.35
   7  -1   0   88.67    1.94
   1   0  -7   93.48    2.41
   0   7  -1   89.26    2.35
   0  -7  -1   95.97    2.42
  -1   0  -7   98.28    2.85
  -7   1   0   88.15    1.93
   7   1   0   90.25    1.91
   7  -1  -1  125.41    2.93
  -1   1  -7  134.52    3.48
   1   7   1  131.95    3.73
   7   1   1  127.51    2.64
   1  -1  -7  143.22    4.11
  -1  -7   1  129.05    3.34
  -1   7  -1  130.96    4.03
  -7   1  -1  140.07    3.27
   1  -7  -1  128.55    3.89
  -1   1  -7  129.91    3.24
  -7   1   1  133.84    3.08
   1  -7   1  131.44    3.46
   1   7  -1  127.71    3.32
   7  -1   1  129.81    2.90
  -1  -7  -1  138.17    3.82
  -1   7   1  129.10    3.85
  -1  -1  -7  139.49    3.52
   7   1  -1  139.72    3.17
  -2   7  -1  652.22   23.66
  -7   1  -2  632.58   21.05
   7  -1  -2  629.07   21.75
   2   7   1  661.57   23.14
  -1   2  -7  644.54   22.48
   1   2   7  720.00   25.61
   1  -2  -7  668.67   23.08
   1  -2  -7  697.23   24.10
   2  -7  -1  660.32   22.95
  -2  -7   1  690.87   23.68
   7   1   2  658.03   20.45
   7  -1   2  652.90   21.67
  -1  -2  -7  688.71   23.86
   1   2  -7  677.19   24.53
  -7  -1  -2  649.20   20.14
  -2   7   1  640.40   22.39
   2  -7   1  657.93   22.92
   7   1  -2  659.51   22.10
   2   7  -1  688.58   24.32
  -7   1   2  650.81   21.93
  -2  -7  -1  671.47   23.50
   7  -1  -3  344.57    9.81
  -7   1  -3  322.31    9.01
   1   3   7  369.90   10.88
  -3  -7   1  357.11   10.23
  -1   3  -7  326.94   10.35
   3  -7  -1  329.08    9.82
   7   1   3  325.95    8.23
   1  -3  -7  377.42   11.66
   3   7   1  350.88    9.88
   1  -3  -7  349.50   10.23
  -3   7  -1  338.00   10.76
  -1  -3  -7  359.59   10.64
   7  -1   3  334.67    9.31
  -3   7   1  349.44   10.40
   7  -1   3  358.07    9.46
   7   1  -3  328.64    9.53
   3  -7   1  335.22   10.68
  -7  -1  -3  312.54    7.88
  -3   7   1  285.11    8.17
   3   7  -1  346.14    9.94
   1   3  -7  336.57   10.10
  -1  -3  -7  350.22   10.50
  -3  -7  -1  360.85   10.56
   4  -7  -1    1.40    0.48
   1  -4  -7    0.87    0.26
   1   4   7    1.60    0.29
  -4  -7   1    1.53    0.35
   7   1   4    1.06    0.27
   7  -1  -4    1.16    0.35
  -1   4  -7    1.77    0.48
  -4   7  -1    1.16    0.49
   1  -4  -7    1.11    0.31
  -7   1  -4    1.08    0.23
   7  -1   4    1.70    0.18
   4  -7   1    1.75    0.49
  -1  -4  -7    1.88    0.32
  -1   4   7    1.59    0.48
  -4   7   1    2.18    0.26
   1  -4   7    2.02    0.34
   7   1  -4    0.97    0.19
   1   4  -7    1.15    0.52
  -4  -7  -1    1.88    0.28
   4   7  -1    1.06    0.20
  -4   7   1    1.35    0.48
   7  -1   4    2.55    0.25
  -1  -4  -7    2.30    0.22
   7   1   5   25.73    0.78
  -5   7  -1   30.58    0.63
  -5  -7   1   26.02    0.68
   1  -5  -7   28.57    0.93
  -5   7  -1   26.55    0.88
  -1   5  -7   24.12    0.88
   5  -7  -1   25.72    0.89
   7  -1  -5   26.51    0.78
   1  -5  -7   28.81    0.85
   1   5   7   27.37    1.24
  -7   1  -5   27.01    0.76
  -5   7   1   25.77    0.87
  -5  -7  -1   26.91    0.76
   1   5  -7   31.74    0.99
   7  -1   5   25.93    0.62
   5  -7   1   25.50    0.87
   7  -1   5   24.57    0.78
  -1   5   7   27.45    1.24
  -5   7   1   31.27    0.74
  -1  -5  -7   27.71    1.02
   7   1  -5   26.25    0.71
  -7  -1  -5   26.69    0.59
   1  -5   7   28.34    1.02
  -1  -6   7 1285.14   55.21
   1  -6  -7 1243.86   52.90
   7  -1  -6 1249.78   52.81
  -1   6  -7 1303.54   56.52
   6  -7  -1 1270.12   54.05
  -7   1  -6 1207.72   49.96
   6   7   1 1212.90   49.50
  -6   7  -1 1311.66   51.45
   7   1   6 1213.90   50.99
  -6   7  -1 1240.24   52.96
  -6  -7   1 1241.92   52.02
   1   6   7 1385.32   59.51
  -1   6   7 1338.03   57.82
  -6   7   1 1243.08   53.14
  -6   7   1 1205.86   48.57
   7  -1   6 1296.46   53.86
   1  -6   7 1286.61   55.28
   1   6  -7 1330.70   57.67
  -1  -6  -7 1263.10   54.06
   6   7  -1 1241.53   51.91
  -6  -7  -1 1296.68   52.74
   6  -7   1 1318.85   56.76
   7   1  -6 1239.10   52.33
   7  -1   6 1216.79   50.10
  -7  -1  -6 1304.61   52.76
   7   2   0  706.85   23.21
  -7   2   0  744.50   26.18
   0   7  -2  736.95   26.41
   7  -2   0  719.20   25.35
  -2   0  -7  733.68   25.90
   0   7   2  724.98   25.73
   0  -7  -2  728.66   25.78
   0  -7   2  715.80   25.68
  -2   0  -7  744.52   26.96
  -1  -7   2  184.93    4.91
   1   7   2  185.08    5.15
   1  -7  -2  193.47    5.60
  -7   2  -1  180.41    4.69
  -1   7  -2  188.79    5.11
   7  -2  -1  171.00    4.66
   2   1   7  191.10    5.00
   2  -1  -7  186.72    4.94
  -2   1  -7  172.12    5.08
  -2   1  -7  197.83    5.35
   7   2   1  174.18    3.53
   1  -7   2  173.19    4.74
  -2  -1  -7  181.57    5.32
  -1   7   2  174.58    4.70
   7  -2   1  189.29    4.91
   1   7  -2  188.15    5.00
  -1  -7  -2  188.21    4.80
   7   2  -1  180.03    4.22
  -7   2   1  191.48    5.07
   2   7   2  146.17    3.91
   7  -2  -2  137.37    3.74
  -2  -7   2  146.09    3.78
   2  -2  -7  140.03    4.14
  -7   2  -2  146.96    3.64
   2   2   7  152.01    3.90
  -2   2  -7  141.58    3.68
  -2   7  -2  141.88    3.82
   2  -2  -7  149.59    4.34
  -2   2  -7  138.57    3.40
   2  -7  -2  140.38    4.25
  -2  -2  -7  152.57    4.45
  -2  -7  -2  142.04    3.85
  -2   7   2  157.65    3.82
   2  -7   2  137.59    3.72
   2   7  -2  148.33    3.82
   7   2  -2  141.21    3.18
   7  -2   2  150.04    3.76
  -7   2   2  136.74    3.71
   7  -2   2  147.72    2.93
  -2   7   2  140.39    3.73
   2   2  -7  148.25    4.55
   2  -3  -7    4.15    0.58
   2  -3  -7    4.21    0.38
  -3  -7   2    4.83    0.35
   3   7   2    4.72    0.39
   2   3   7    5.66    0.61
   3  -7  -2    5.27    0.65
   7  -2  -3    4.80    0.32
  -7   2  -3    6.25    0.38
  -2   3  -7    4.93    0.38
   7  -2   3    6.52    0.40
   7  -2   3    4.02    0.14
  -2  -3  -7    4.68    0.43
  -7   2   3    4.40    0.30
   3  -7   2    4.21    0.69
  -3   7   2    4.47    0.40
   3   7  -2    4.48    0.54
  -3  -7  -2    5.00    0.42
   2  -3   7    5.15    0.43
  -2  -3  -7    5.22    0.65
   2   3  -7    5.65    0.44
  -3   7   2    4.11    0.27
  -7   2  -4 1096.24   43.66
   4  -7  -2 1128.09   46.12
   7  -2  -4 1161.49   47.65
  -4  -7   2 1149.69   46.47
  -2   4  -7 1106.81   45.27
   4   7   2 1148.68   45.21
   2   4   7 1171.63   48.61
   2  -4  -7 1276.71   52.59
  -4   7  -2 1173.24   49.04
   2  -4  -7 1150.68   47.01
   2   4  -7 1108.31   45.70
   7  -2   4 1179.50   44.98
   2  -4   7 1101.96   45.64
  -4  -7  -2 1089.49   43.07
   7  -2   4 1160.06   46.54
  -2   4   7 1295.02   53.46
  -7  -2  -4  997.24   36.35
  -7  -2  -4 1111.57   40.46
   4   7  -2 1102.27   45.30
  -4   7   2 1223.73   49.22
   4  -7   2 1131.36   46.27
  -2  -4  -7 1140.08   45.88
  -4   7   2 1141.57   46.80
  -5  -7   2  202.60    5.38
   2  -5  -7  228.16    6.74
   5  -7  -2  207.08    5.80
   5   7   2  223.25    5.60
  -7   2  -5  206.99    5.62
   2  -5  -7  208.39    5.78
  -2   5  -7  202.52    6.25
   7  -2  -5  198.47    5.42
   2   5   7  211.72    6.37
  -5   7  -2  195.29    5.57
   7   2   5  216.33    5.54
   7  -2   5  214.70    5.81
   5   7  -2  214.21    5.58
  -7  -2  -5  213.09    4.84
  -2  -5  -7  199.94    5.62
  -5   7   2  222.74    5.75
  -5  -7  -2  205.26    5.24
   2   5  -7  209.22    5.88
   2  -5   7  214.96    6.74
  -2   5   7  222.06    6.59
   5  -7   2  196.25    6.09
  -5   7   2  197.78    6.16
   2   6   7  339.62   10.77
  -2  -6   7  313.86    9.73
   7   2   6  330.23    9.42
  -6   7  -2  318.97    9.71
  -7   2  -6  316.48    9.07
   2  -6  -7  347.05   10.91
  -2   6  -7  320.23    9.71
   6   7   2  343.48    9.23
  -6   7  -2  332.09    8.27
   2  -6  -7  316.41   10.11
   6  -7  -2  329.24   10.50
  -6  -7   2  335.61    9.52
   7  -2  -6  321.62   10.02
   6  -7   2  305.57    9.25
  -6  -7  -2  316.51    8.65
   7  -2   6  313.19    9.03
  -2  -6  -7  323.47    9.37
  -6   7   2  314.08    8.77
  -2   6   7  340.62   10.23
  -6   7   2  309.14    9.43
   2  -6   7  322.67   10.67
  -2   6   7  320.77    9.68
  -7  -2  -6  335.42    8.89
   2   6  -7  324.17    9.87
   6   7  -2  321.06    9.15
   7  -3   0   15.51    0.32
  -3   0  -7   16.14    0.84
  -7   3   0   15.13    0.72
   0   7  -3   18.40    1.04
   7   3   0   15.27    0.36
  -3   0  -7   18.20    0.58
   0   7   3   15.73    0.59
   7   3   0   17.76    0.40
   0  -7  -3   14.75    0.58
   0  -7   3   16.97    0.71
   7  -3   0   16.17    0.76
   7  -3  -1  949.81   34.33
   1   7   3  962.52   36.99
   7  -3  -1 1020.09   39.50
  -3   1  -7  932.18   35.93
   1  -7  -3  964.65   37.28
   3   1   7  970.53   37.36
   3  -1  -7  998.06   38.61
  -3   1  -7  979.69   37.37
  -7   3  -1  997.47   38.39
  -1  -7   3  969.02   38.69
  -1   7  -3  980.19   38.26
  -1   7   3  990.50   39.08
  -3  -1  -7 1084.75   42.19
  -7   3   1  992.36   38.49
   7  -3   1 1005.18   38.73
  -1  -7  -3  958.35   37.48
   7   3  -1  919.15   33.89
   1  -7   3  986.81   39.32
  -3  -1  -7  881.12   33.83
  -1   7   3  933.70   36.08
   1   7  -3 1024.16   40.54
  -3   2  -7   56.90    1.83
   3   2   7   63.62    1.95
   2  -7  -3   59.32    1.60
   7  -3  -2   62.99    1.53
  -2  -7   3   60.18    2.01
   2   7   3   61.27    1.70
   3  -2  -7   71.45    1.76
  -7   3  -2   59.08    1.63
   3  -2  -7   64.34    2.06
  -2   7  -3   66.27    1.77
   7  -3  -2   63.44    1.36
  -3   2  -7   57.47    1.60
   2   7  -3   62.11    1.63
   3   2  -7   61.17    1.72
   7   3  -2   57.86    1.42
   7  -3   2   60.04    1.67
  -2   7   3   59.18    1.59
  -3  -2  -7   63.56    1.65
  -2   7   3   61.00    1.50
  -7   3   2   57.73    1.75
  -2  -7  -3   59.76    1.40
   2  -7   3   62.48    2.17
   3  -3  -7  151.48    4.47
   3   7   3  143.46    3.45
  -3  -7   3  153.21    3.98
   3  -3  -7  153.71    4.01
  -3   7  -3  149.72    4.08
  -3   3  -7  145.95    4.23
  -3   3  -7  141.73    3.43
   3   3   7  152.98    4.40
   7  -3  -3  149.41    3.65
  -7   3  -3  144.61    3.56
   3  -7  -3  145.37    4.44
   7  -3  -3  144.76    3.71
  -7   3   3  145.06    3.73
   3   3  -7  147.03    4.60
   3   7  -3  151.68    3.93
  -3  -7  -3  151.15    3.60
   3  -7   3  161.67    4.24
  -3   7   3  154.16    4.17
  -3  -3  -7  150.85    3.87
   3  -3   7  141.99    4.39
  -3   7   3  144.40    4.36
   7  -3   3  145.90    3.92
   7   3  -3  143.82    3.74
   4   7   3 1522.40   64.65
  -7   3  -4 1421.84   62.12
   4  -7  -3 1466.45   65.13
   7  -3  -4 1375.01   60.68
  -4  -7   3 1437.84   62.64
   7  -3  -4 1467.48   63.27
   3   4   7 1483.07   65.53
   3  -4  -7 1453.51   63.62
   3  -4  -7 1517.47   66.98
  -3   4  -7 1391.60   60.80
  -4   7  -3 1355.39   60.93
  -4   7   3 1485.38   63.99
  -3  -4  -7 1375.30   59.12
  -4  -7  -3 1417.26   60.49
  -4   7   3 1407.98   62.88
  -7   3   4 1404.19   62.07
   4   7  -3 1378.44   61.06
   3  -4   7 1365.62   61.45
   4  -7   3 1299.69   57.29
   7   3  -4 1388.51   60.51
   7  -3   4 1348.65   58.96
   3   4  -7 1344.16   59.38
  -5   7  -3  350.44   10.84
   3   5   7  370.72   11.81
  -5  -7   3  373.52   11.48
   7  -3  -5  367.25   11.06
   7  -3  -5  321.26   10.38
   7   3   5  359.77   10.95
   3  -5  -7  364.05   11.14
   5   7   3  366.00   10.30
  -3   5  -7  344.35   11.18
   3  -5  -7  376.91   11.88
   5  -7  -3  343.63   11.23
  -7   3  -5  346.92   10.26
  -5   7   3  357.60   11.59
  -7  -3  -5  347.92    8.79
   7  -3   5  351.74   10.34
   7   3  -5  357.02   11.05
   3  -5   7  338.17   10.59
  -5  -7  -3  359.64   10.16
   5   7  -3  366.80   11.20
  -5   7   3  370.46   10.94
   5  -7   3  346.73   10.63
   3   5  -7  350.81   11.44
  -3  -5  -7  351.74   10.56
  -7  -3  -5  315.40    8.05
   6  -7  -3  227.59    6.59
   6   7   3  255.43    6.29
  -3   6  -7  232.62    6.74
   7  -3  -6  228.53    6.98
  -6   7  -3  232.15    7.28
   3  -6  -7  240.26    6.89
   7   3   6  230.39    6.32
   3   6   7  232.21    7.23
  -7   3  -6  234.97    6.43
   7  -3  -6  248.87    6.76
   3  -6  -7  247.11    6.95
   3  -6   7  222.58    6.65
  -6   7   3  230.13    7.22
   7  -3   6  231.60    6.79
   7   3  -6  236.17    7.07
   6   7  -3  238.01    6.76
  -3   6   7  252.17    7.60
  -3  -6  -7  229.98    6.17
  -6  -7  -3  246.63    6.15
  -7  -3  -6  240.66    5.77
  -7  -3  -6  227.52    5.57
  -3   6   7  234.14    6.76
   3   6  -7  235.87    7.35
   6  -7   3  221.94    6.46
  -7   4   0  892.27   33.39
  -4   0  -7  900.18   33.57
   0   7   4  898.31   34.56
  -4   0  -7  836.92   31.70
   0   7   4  882.19   33.86
   4   0   7  917.58   34.58
   0   7  -4  909.76   34.59
   0  -7  -4  851.03   32.73
   7  -4   0  892.24   33.94
   7   4   0  879.35   30.67
   0  -7   4  887.81   34.68
   1  -7  -4    4.71    0.35
   1   7   4    2.72    0.36
  -4   1  -7    3.18    0.44
   4  -1  -7    4.13    0.54
   4   1   7    5.07    0.47
   7  -4  -1    4.27    0.31
  -7   4  -1    5.32    0.30
  -1  -7   4    4.75    0.42
   1   7   4    5.02    0.30
  -1   7  -4    2.65    0.40
  -4   1  -7    2.84    0.25
  -1   7   4    3.54    0.53
   1  -7   4    3.41    0.41
  -1   7   4    4.31    0.55
  -4  -1  -7    3.50    0.39
   7  -4   1    3.58    0.48
  -4  -1  -7    3.37    0.51
  -7   4   1    5.70    0.32
  -1  -7  -4    3.29    0.29
   7   4  -1    3.15    0.24
   1   7  -4    3.71    0.40
  -4   2  -7    1.06    0.27
   7  -4  -2    1.34    0.16
   7  -4  -2    0.49    0.37
  -2  -7   4    0.95    0.48
  -2   7  -4    1.85    0.48
   2  -7  -4    0.77    0.42
   2   7   4    0.57    0.30
  -4   2  -7    2.22    0.35
  -7   4  -2    0.93    0.34
   4  -2  -7    1.27    0.25
   4  -2  -7    0.58    0.42
   4   2   7    0.84    0.37
  -2   7   4    1.05    0.27
  -2  -7  -4    1.54    0.20
   7  -4   2    0.64    0.34
  -7   4   2    0.62    0.36
   7   4  -2    1.02    0.22
   2   7  -4    0.83    0.26
   2  -7   4    1.53    0.30
  -4  -2  -7    1.87    0.18
  -2   7   4    0.70    0.23
  -4   3  -7  241.09    6.60
   4  -3  -7  228.97    6.45
   4   3   7  239.08    7.03
   7  -4  -3  248.07    6.41
  -7   4  -3  231.77    6.71
  -4   3  -7  235.70    6.09
   4  -3  -7  250.41    6.90
  -3  -7   4  248.21    6.95
  -3   7  -4  227.16    7.15
   3   7   4  247.87    6.45
   3  -7  -4  234.11    6.64
   7  -4  -3  225.45    6.28
  -4  -3  -7  243.02    6.47
   7  -4   3  236.68    6.78
  -3   7   4  246.76    6.72
  -3   7   4  243.01    6.87
  -3  -7  -4  246.49    6.67
   3   7  -4  235.24    7.06
   3  -7   4  225.66    7.06
   7   4  -3  227.40    5.97
  -7   4   3  250.16    7.29
   4   3  -7  225.48    6.54
   4  -3   7  238.23    6.70
  -7   4  -4  108.94    2.64
  -4   4  -7   95.93    2.52
  -4   7  -4   99.51    2.72
   4  -7  -4   96.04    2.62
   7  -4  -4  105.07    2.58
   4   7   4  107.75    2.37
   4  -4  -7  108.86    3.15
  -4   4  -7   94.80    2.35
   4   4   7   99.10    2.59
  -4  -7   4  100.56    3.09
   7  -4  -4   99.56    2.57
   4  -4  -7   99.15    2.67
  -4   7   4  107.09    2.88
  -4  -4  -7  110.44    2.64
  -4   7   4   94.09    2.59
   7  -4   4   97.57    2.78
  -4  -7  -4  110.09    2.60
  -7   4   4  100.40    3.01
   4   7  -4   98.02    2.53
   4  -4   7  101.43    2.73
   4   4  -7  101.30    3.23
   7   4  -4   94.36    2.31
   4  -7   4   96.08    2.64
   4   5   7  302.52    9.08
   4  -5  -7  316.79    9.55
   7  -4  -5  302.04    9.02
   5   7   4  316.24    8.68
  -7   4  -5  326.20    9.45
   4  -5  -7  337.15    9.86
   7  -4  -5  328.85    9.58
  -4   5  -7  319.20    9.50
  -5  -7   4  303.95    8.98
  -5   7  -4  324.67   10.37
   5  -7  -4  298.80    9.65
  -7  -4  -5  279.66    6.72
   7   4  -5  316.20    9.15
  -7  -4  -5  286.95    6.87
   5   7  -4  327.07    9.50
   4  -5   7  299.64    9.79
   4   5  -7  313.59    9.45
  -5  -7  -4  311.48    8.61
  -5   7   4  333.33    9.44
  -4  -5  -7  325.07    9.25
  -5   7   4  303.12    9.82
  -7   4   5  318.33    9.48
   7  -4   5  309.84    9.48
   5  -7   4  321.48    9.64
  -4   6  -7  274.09    8.29
   6  -7  -4  277.57    8.33
   4  -6  -7  301.87    8.78
   4   6   7  275.28    8.25
   4  -6  -7  287.95    9.21
   7  -4  -6  267.44    8.54
  -7   4  -6  269.30    8.31
  -6   7  -4  288.03    8.62
   7  -4  -6  294.40    8.72
   6   7   4  297.89    7.70
   7   4   6  272.10    7.94
   7  -4   6  281.59    8.65
  -4   6   7  275.10    8.30
   4  -6   7  279.52    9.23
   6   7  -4  272.40    7.86
  -6  -7  -4  292.20    7.67
  -7  -4  -6  295.57    7.30
   6  -7   4  286.26    9.14
  -4  -6  -7  297.40    8.42
  -7  -4  -6  280.15    7.12
  -6   7   4  287.58    9.24
   7   4  -6  264.66    7.84
   4   6  -7  286.12    8.53
   5   0   7  750.55   26.64
  -5   0  -7  776.05   27.78
   0   7  -5  707.38   25.78
   0  -7   5  700.13   25.51
   0  -7  -5  693.93   24.81
   7  -5   0  677.56   24.25
   0   7   5  731.11   26.69
   7   5   0  740.67   24.43
  -5   0  -7  694.08   24.58
  -7   5   0  727.28   26.47
   0   7   5  736.17   27.06
  -5   1  -7    9.48    0.38
   7   5   1    9.11    0.21
   5   1   7   12.51    0.60
   7  -5  -1    9.77    0.70
   1   7   5    9.41    0.63
   1  -7  -5   14.61    0.77
   1   7   5   11.16    0.54
  -5   1  -7   10.14    0.38
  -1   7  -5    9.69    0.56
  -7   5  -1   10.87    0.47
   5  -1  -7    8.86    0.71
  -1  -7   5   10.04    0.91
   7  -5   1    9.38    0.69
   1   7  -5    9.21    0.52
   7   5  -1    9.86    0.37
   1  -7   5    9.74    0.58
  -1   7   5   10.16    0.72
  -5  -1  -7    9.55    0.33
  -1   7   5    9.54    0.74
  -7   5   1   10.09    0.46
  -1  -7  -5   10.40    0.43
  -2  -7   5 1177.46   48.91
   2  -7  -5 1182.13   48.87
  -7   5  -2 1132.19   47.42
   7  -5  -2 1160.67   47.77
  -5   2  -7 1178.99   47.79
   5   2   7 1150.30   46.99
   5  -2  -7 1136.97   47.67
  -2   7  -5 1088.60   45.48
   7  -5  -2 1101.57   43.12
   2   7   5 1174.50   48.44
   5  -2  -7 1229.15   50.49
   2   7   5 1257.85   51.46
  -5   2  -7 1164.35   48.18
   7  -5   2 1163.18   48.50
  -7   5   2 1151.38   47.52
   2  -7   5 1161.15   49.25
   7   5  -2 1134.16   45.01
  -2  -7  -5 1134.50   46.77
   2   7  -5 1145.55   48.51
  -2   7   5 1175.55   48.70
   5  -2   7 1178.38   48.89
  -5  -2  -7 1145.26   46.03
  -2   7   5 1252.69   52.23
   3  -7  -5  359.13   10.95
  -5   3  -7  336.70    9.47
  -3   7  -5  348.92   11.41
   3   7   5  343.38   10.48
   7  -5  -3  335.31   10.14
   3   7   5  345.85   10.25
   5  -3  -7  337.77   10.82
   5  -3  -7  370.46   11.52
   5   3   7  335.64   10.04
  -5   3  -7  355.40   10.93
   7  -5  -3  333.18    9.46
  -3  -7   5  339.25   10.48
  -7   5  -3  330.93    9.96
  -3   7   5  355.52   11.41
   5   3  -7  354.97   10.83
   3   7  -5  356.15   10.80
  -3  -7  -5  340.40   10.15
   7   5  -3  342.56   10.11
  -5  -3  -7  337.90    9.46
   5  -3   7  357.15   11.26
   3  -7   5  330.92   10.26
  -5  -3  -7  357.23   10.12
  -3   7   5  367.15   10.94
  -7   5   3  338.31   10.28
   7  -5   3  332.27    9.98
  -7   5  -4  133.07    3.47
   5   4   7  128.07    3.83
   7  -5  -4  140.42    3.49
   5  -4  -7  126.63    3.45
   4   7   5  130.14    3.26
  -4   7  -5  135.24    3.72
   7  -5  -4  126.18    3.40
  -5   4  -7  133.67    3.90
   4  -7  -5  133.87    3.67
  -5   4  -7  133.90    3.25
  -4  -7   5  138.11    4.19
   5  -4  -7  139.73    3.60
   5   4  -7  132.09    4.07
   7  -5   4  135.36    3.49
  -4  -7  -5  136.79    3.39
   4   7  -5  132.13    3.91
  -4   7   5  134.56    3.45
   7   5  -4  125.76    3.14
   4  -7   5  129.90    4.13
  -7   5   4  130.39    3.51
   5  -4   7  124.34    3.88
  -5  -4  -7  127.89    3.11
  -4   7   5  131.28    4.09
  -5   5  -7  481.49   15.03
   5  -7  -5  475.59   16.60
  -5   5  -7  489.80   16.19
  -5   7  -5  505.99   17.59
   7  -5  -5  485.03   15.35
   5   5   7  486.10   16.69
   5  -5  -7  526.18   17.63
  -7   5  -5  489.41   16.69
   7  -5  -5  488.97   16.15
   5  -5  -7  482.29   16.00
  -5   7   5  502.47   16.21
   7   5  -5  475.33   15.47
   5   5  -7  476.11   15.88
  -5   7   5  501.11   16.74
  -5  -5  -7  480.87   14.77
   5  -5   7  508.90   16.90
  -7   5   5  500.61   17.27
   7  -5   5  470.19   15.46
  -5  -7  -5  498.08   15.44
   5  -7   5  514.32   17.68
  -7  -5  -5  452.62   12.73
   5   7  -5  478.84   16.26
  -7  -5  -5  481.76   13.53
   7  -5  -6  147.26    4.12
  -5   6  -7  141.54    3.32
   6  -7  -5  135.55    3.91
  -7   5  -6  151.51    4.06
   5  -6  -7  143.88    4.14
   7   5   6  147.79    4.49
  -5   6  -7  140.49    4.52
   5   6   7  148.82    4.16
   7  -5  -6  140.86    3.98
  -6   7  -5  142.59    4.06
  -7   5  -6  158.16    3.58
   5  -6  -7  145.31    3.90
  -7   5   6  141.64    4.53
   5   6  -7  140.15    3.94
   6   7  -5  146.41    4.31
  -5   6   7  145.40    4.15
  -6   7   5  142.43    4.12
   6  -7   5  144.82    4.62
  -5  -6  -7  147.36    3.70
  -6  -7  -5  155.22    3.61
   7   5  -6  144.50    3.91
   7  -5   6  143.62    4.39
  -7  -5  -6  149.32    3.23
  -7  -5  -6  142.33    3.07
   5  -6   7  151.56    4.80
   7   6   0  390.52   11.05
   0   7   6  388.69   12.47
   0   7  -6  385.53   12.86
   0  -7   6  379.91   12.18
   6   0  -7  391.93   12.07
  -7   6   0  375.75   12.25
   0   7   6  407.67   12.66
   6   0   7  398.33   12.07
  -6   0  -7  391.60   11.71
   0  -7  -6  404.45   12.38
   7  -6   0  383.84   12.51
   6  -1  -7  317.09    9.93
   1   7   6  332.09    9.69
   6   1   7  323.14    9.23
   7   6   1  319.23    8.37
   1  -7  -6  320.92   10.08
  -1   7  -6  324.25   10.61
  -7   6  -1  315.75    9.96
  -6   1  -7  335.89    9.48
   7  -6  -1  329.77   10.34
   1   7   6  324.97   10.34
  -1  -7   6  305.65    9.53
   1  -7   6  319.02    9.87
  -1   7   6  322.08   10.13
  -1   7   6  334.15   10.52
   7  -6   1  307.78    9.71
   1   7  -6  320.07    9.77
   7   6  -1  330.45    8.94
  -1  -7  -6  351.08   10.53
  -7   6   1  308.30    9.81
  -6  -1  -7  325.33    9.16
   2  -7  -6  825.52   31.55
   2   7   6  877.03   34.13
   6  -2  -7  936.77   35.90
  -2  -7   6  870.08   34.50
   6   2   7  859.91   32.73
   2   7   6  883.85   33.40
  -2   7  -6  816.66   31.52
   6  -2  -7  858.99   33.28
  -6   2  -7  823.85   30.81
  -7   6  -2  830.42   31.62
  -6   2  -7  908.30   33.41
   7  -6  -2  872.40   33.77
   7   6   2  854.88   29.06
  -2   7   6  870.25   33.95
   2   7  -6  837.46   32.16
  -2  -7  -6  855.42   32.48
   7   6  -2  825.93   30.63
  -7   6   2  904.87   35.05
  -7  -6  -2  844.32   28.74
   7  -6   2  839.41   31.86
   2  -7   6  823.03   31.75
  -2   7   6  920.70   35.61
   6  -2   7  877.98   33.39
  -6  -2  -7  836.68   30.47
  -6   3  -7 1455.94   64.08
  -3   7  -6 1326.00   58.86
   7  -6  -3 1362.93   57.05
   3   7   6 1393.62   61.34
   7  -6  -3 1369.41   60.19
   6  -3  -7 1487.76   64.89
  -7   6  -3 1368.71   61.12
   6   3   7 1461.33   64.24
  -6   3  -7 1494.59   63.30
   3   7   6 1527.47   65.90
   6  -3  -7 1388.38   60.92
   3  -7  -6 1378.51   61.83
  -3  -7   6 1421.19   62.83
  -3  -7  -6 1335.72   57.71
  -6  -3  -7 1302.87   55.14
   3   7  -6 1409.80   63.02
   3  -7   6 1402.08   63.15
  -7   6   3 1381.85   61.79
   7   6  -3 1366.79   59.22
  -6  -3  -7 1353.03   56.96
  -3   7   6 1469.25   64.46
  -3   7   6 1423.57   62.77
   6   3  -7 1288.17   56.97
   7  -6   3 1340.60   59.89
   6  -3   7 1363.15   60.47
  -7  -6  -3 1371.10   54.41
   4  -7  -6    9.89    0.92
  -6   4  -7   12.07    0.42
  -6   4  -7   10.22    0.50
   6   4   7    9.72    0.52
  -7   6  -4   10.03    0.54
   4   7   6   10.70    0.89
  -4   7  -6   13.02    0.94
   6  -4  -7   10.45    0.75
   6  -4  -7    9.12    0.87
   7  -6  -4    9.28    0.56
  -7   6   4    9.12    0.55
  -6  -4  -7   12.20    0.41
  -6  -4  -7    8.98    0.35
  -4   7   6   11.06    0.75
   7   6  -4   10.39    0.61
   4   7  -6   11.12    0.83
  -4  -7  -6   10.13    0.50
   6   4  -7   10.21    0.82
  -4   7   6    9.60    0.89
  -7  -6  -4   11.31    0.23
   7  -6   4   11.67    0.84
   4  -7   6   13.25    0.98
   6  -4   7   10.73    0.80
   6  -5  -7   41.20    1.16
   6   5   7   40.95    1.24
   5  -7  -6   39.38    1.10
  -6   5  -7   40.42    1.21
  -7   6  -5   40.74    0.64
   6  -5  -7   36.41    1.22
   7  -6  -5   39.37    1.21
  -5   7  -6   47.19    1.39
   7  -6  -5   37.04    1.23
  -6   5  -7   36.54    0.90
   5   7   6   38.89    1.30
  -7   6  -5   38.90    1.60
   5  -7  -6   40.04    1.35
  -6  -5  -7   39.62    0.94
   5  -7   6   39.28    1.80
  -7  -6  -5   44.27    0.84
   7  -6   5   37.96    1.18
  -7   6   5   39.91    1.69
  -5  -7  -6   41.78    1.07
   6  -5   7   39.46    1.69
   7   6  -5   41.70    1.13
   6   5  -7   40.70    1.26
   5   7  -6   39.84    1.57
  -5   7   6   39.29    1.76
   6  -6  -7 1448.70   64.49
   6  -7  -6 1313.16   58.84
   6  -7  -6 1361.87   59.75
  -6   6  -7 1439.69   64.03
   7  -6  -6 1304.67   58.33
   7   6   6 1418.58   64.13
  -6   7  -6 1400.56   58.73
   6   7   6 1411.95   64.13
  -6   6  -7 1343.94   56.51
  -7   6  -6 1335.23   55.12
   7  -6  -6 1378.40   61.17
   6   6   7 1381.67   61.40
   6  -6  -7 1360.01   60.79
  -7   6  -6 1457.95   66.06
  -6   7  -6 1416.52   64.48
   6  -6   7 1398.12   63.53
   6   6  -7 1365.96   60.86
   7  -6   6 1362.98   60.84
  -6  -7  -6 1325.70   55.78
  -6   6   7 1376.64   61.77
  -6   7   6 1386.49   62.17
  -7   6   6 1445.12   65.70
   6  -7   6 1421.28   64.52
  -7  -6  -6 1412.18   58.06
  -6  -6  -7 1400.90   59.55
   6   7  -6 1407.07   63.31
   7   6  -6 1383.98   61.99
   7  -7   0   78.57    2.14
   7   0  -7   78.03    2.02
   0  -7   7   76.88    2.28
  -7   7   0   73.70    2.04
   7   0   7   79.10    1.97
   0   7   7   81.10    2.38
  -7   0  -7   78.84    1.91
   0   7  -7   78.66    2.70
   0  -7  -7   76.25    1.99
  -7  -7   0   77.04    1.75
   0   7   7   77.66    2.13
   7   7   0   78.12    1.74
   1   7   7   53.49    1.55
   7   7   1   56.14    1.15
   7   1   7   55.31    1.50
  -1   7  -7   53.14    2.01
  -1  -7   7   55.22    1.72
   7  -7  -1   56.06    1.58
   7  -1  -7   53.98    1.80
   1  -7  -7   55.55    1.50
  -7   7  -1   53.04    1.51
  -7   1  -7   54.05    1.45
  -1   7   7   52.72    1.82
   7   7  -1   53.49    1.34
  -1  -7  -7   55.08    1.70
   7  -7   1   57.18    1.96
   1  -7   7   55.23    1.69
  -1   7   7   56.67    2.00
  -7  -7  -1   55.08    1.17
   1   7  -7   55.02    1.62
  -7   7   1   53.51    1.90
  -7  -1  -7   53.95    1.27
   2  -7  -7   56.39    1.58
   7  -2  -7   60.22    1.89
   7   7   2   55.95    1.11
  -2  -7   7   56.21    2.25
   2   7   7   56.60    1.65
   7  -2  -7   56.20    1.56
  -2   7  -7   53.53    2.13
   7  -7  -2   54.02    2.01
   7   2   7   56.40    1.38
  -7   7  -2   54.17    1.97
  -7   2  -7   57.70    1.63
  -7  -2  -7   54.94    1.22
   7  -2   7   59.12    1.72
   2  -7   7   54.93    2.28
   2   7  -7   54.68    2.11
  -2   7   7   54.98    1.58
   7   7  -2   57.37    1.52
  -2   7   7   57.93    1.64
   7  -7   2   55.17    1.98
  -7   3  -7   62.76    1.85
   3  -7  -7   58.15    1.71
  -3   7  -7   59.58    1.78
   7  -7  -3   60.27    2.17
   7  -3  -7   61.95    2.12
   7   7   3   66.67    1.23
   7  -3  -7   62.73    1.63
   3   7   7   76.17    2.45
  -7   7  -3   65.69    1.81
   7   3   7   58.87    1.86
  -3   7   7   62.51    1.76
   3   7  -7   62.64    1.80
   3  -7   7   62.31    1.92
  -3   7   7   59.60    1.72
  -7  -7  -3   63.17    1.22
  -7  -3  -7   60.20    1.27
   7   3  -7   58.66    2.07
  -3  -7  -7   61.87    1.71
   7  -7   3   57.77    1.68
  -7   7   3   61.21    1.76
  -7  -3  -7   59.19    1.28
   7  -3   7   61.04    1.59
   7   4   7    1.51    0.25
  -4   7  -7    0.72    0.31
   4  -7  -7    1.01    0.27
   7  -4  -7    0.78    0.29
   7  -7  -4    2.10    0.51
   4  -7  -7    2.40    0.52
  -7   4  -7    1.73    0.19
  -7   7  -4    0.62    0.48
   7  -4  -7    1.03    0.38
   4   7  -7    1.27    0.30
   4  -7   7    1.13    0.33
  -4   7   7    0.95    0.44
   7   7  -4    0.87    0.33
  -4   7   7    0.86    0.31
   7   4  -7    0.75    0.28
   7  -7   4    1.53    0.30
  -7  -7  -4    1.35    0.12
  -7   7   4    1.23    0.49
  -7  -4  -7    0.93    0.14
   7  -4   7    0.73    0.26
  -7  -4  -7    1.69    0.16
  -7   7  -5    4.27    0.46
   5   7   7    4.48    0.48
   7  -5  -7    4.82    0.36
   7  -5  -7    4.63    0.47
   7  -7  -5    4.21    0.48
   5  -7  -7    4.73    0.39
   7   5   7    6.19    0.69
   5  -7  -7    4.74    0.51
   7  -7  -5    4.45    0.28
  -7   5  -7    5.03    0.25
  -7   5  -7    4.74    0.63
  -7   7   5    4.70    0.75
   5  -7   7    6.88    0.52
   5   7  -7    4.93    0.46
   7  -5   7    4.72    0.71
  -7  -5  -7    5.00    0.22
   7  -7   5    4.06    0.46
  -5   7   7    5.43    0.49
  -7  -7  -5    5.57    0.21
  -7  -5  -7    5.84    0.25
  -7   7  -6   30.45    0.60
   7  -7  -6   28.14    1.69
  -7   7  -6   28.76    1.12
   7  -7  -6   29.94    0.89
  -6   7  -7   30.03    1.16
   6  -7  -7   30.23    0.98
   7  -6  -7   27.92    1.16
   6   7   7   29.75    1.19
  -6   7  -7   30.37    0.79
  -7   6  -7   28.05    0.68
   7  -6  -7   31.47    1.30
   7   7   6   31.22    1.19
   7   6   7   30.91    1.14
  -7   6  -7   28.70    1.07
   6  -7  -7   28.42    1.18
  -7  -7  -6   31.69    0.71
  -6  -7  -7   29.00    0.84
   7  -6   7   30.77    1.13
   7   6  -7   31.00    1.47
   7  -7   6   30.32    1.14
   6  -7   7   29.83    1.71
   7   7  -6   30.64    1.01
  -7   7   6   29.96    1.21
  -6   7   7   30.12    1.22
   6   7  -7   29.64    1.10
  -7  -6  -7   30.52    0.71
  -7   7  -7 2046.70  101.19
   7   7   7 2122.27  110.44
  -7   7  -7 2174.74  113.41
   7  -7  -7 2198.81  112.98
   7  -7  -7 2225.16  117.36
   7  -7   7 2274.15  119.94
  -7   7   7 2246.51  118.90
   7   7  -7 2282.95  119.40
  -7  -7  -7 2172.65  107.60
   8   0   0  285.60    7.59
   0   0  -8  290.65    8.28
   0   8   0  278.47    8.63
   0  -8   0  290.59    8.84
  -8   0   0  279.37    7.40
   1  -8   0  178.01    4.78
  -8   0  -1  175.85    4.05
   0   1  -8  172.46    5.19
  -1  -8   0  169.70    4.45
  -1   8   0  162.99    4.45
   0   1  -8  168.08    4.43
   8   0   1  166.45    3.91
   0  -1  -8  176.65    4.66
   8   0  -1  166.95    4.16
   1   8   0  168.79    4.87
  -2  -8   0  592.34   19.92
   0  -2  -8  636.60   21.51
   2   8   0  587.86   20.38
  -8   0  -2  578.80   18.18
   8   0   2  594.15   18.65
   8   0  -2  579.33   19.20
   2  -8   0  605.14   21.26
   0   2  -8  593.63   20.31
  -2   8   0  606.80   20.78
   3   8   0  136.89    3.77
   8   0   3  142.62    3.13
   0   3  -8  137.09    3.73
   0  -3  -8  145.45    3.85
  -3   8   0  133.95    3.62
  -8   0  -3  136.97    2.99
   0   3   8  144.38    3.83
   8   0  -3  139.37    3.33
  -3  -8   0  142.64    3.90
   0  -3  -8  136.93    3.53
   3  -8   0  127.49    3.48
   0   4   8    2.56    0.34
   4  -8   0    2.20    0.56
   0   4  -8    3.37    0.35
   8   0   4    2.35    0.16
   0  -4  -8    1.56    0.27
   4   8   0    2.36    0.23
   8   0   4    3.49    0.20
  -4  -8   0    2.95    0.37
  -4   8   0    1.84    0.55
   8   0  -4    1.69    0.35
  -5  -8   0  965.42   36.45
  -8   0  -5  880.96   32.07
   0   5   8  905.06   35.12
   5  -8   0  888.07   34.39
   0  -5  -8  920.02   35.66
   8   0  -5  891.41   34.45
   5   8   0  959.82   36.27
   8   0   5  922.60   34.13
  -5   8   0  941.35   34.59
   8   0   5  889.00   32.34
  -5   8   0  857.22   33.52
   0   5  -8  845.38   33.78
   0  -5  -8  864.61   33.26
   8   0  -6  649.14   23.36
   0   6   8  686.99   25.27
  -6  -8   0  660.75   22.72
   6  -8   0  663.18   24.42
  -6   8   0  638.67   23.01
   0   6  -8  642.15   23.04
   8   0   6  634.19   21.33
   0  -6   8  627.46   22.93
   6   8   0  709.76   24.19
  -8   0  -6  663.89   22.29
  -6   8   0  661.61   21.84
   0  -6  -8  662.30   23.44
  -8   0  -7  822.79   30.21
   8   0  -7  871.72   33.98
  -7   8   0  899.03   35.51
   8   0   7  829.81   30.73
  -7  -8   0  844.17   31.39
   7  -8   0  871.68   34.42
   0  -7  -8  849.91   32.74
   7   8   0  875.78   31.94
   0  -7   8  853.51   33.64
   0   7   8  880.88   34.14
   0   7  -8  873.38   34.03
  -8   1   0    3.05    0.27
   8   1   0    2.53    0.18
   1   0  -8    3.07    0.51
   0   8   1    2.83    0.48
   0   8  -1    3.27    0.54
   0  -8  -1    2.06    0.29
   0  -8   1    3.25    0.54
  -1   0  -8    2.36    0.29
  -1   0  -8    3.59    0.33
   8  -1   0    2.34    0.28
   8   1   1 1081.62   39.74
  -8   1  -1 1096.99   41.79
   1  -1  -8 1090.63   43.95
  -1   1  -8 1012.30   39.86
   1  -8  -1  996.10   39.56
   8  -1  -1  998.08   38.37
   1   8   1 1022.85   40.38
  -1   1  -8 1057.64   41.89
  -1   8  -1 1060.85   42.25
  -1  -8   1  986.26   39.14
   8   1  -1  971.87   36.99
   1   8  -1 1007.94   40.07
  -1  -1  -8 1046.42   41.35
  -1  -8  -1  999.07   39.42
   8  -1   1 1033.95   39.55
  -1   8   1 1065.64   43.08
  -8   1   1 1039.55   40.44
   1  -8   1 1073.57   43.38
   1  -2  -8  143.70    4.24
   8   1   2  143.95    2.87
  -2  -8   1  145.99    3.72
   2  -8  -1  138.05    3.67
   8  -1  -2  134.21    3.22
  -1   2  -8  135.45    4.08
   2   8   1  131.79    3.35
  -2   8  -1  135.11    3.65
  -1   2  -8  132.87    3.36
  -8   1  -2  144.10    3.34
   2   8  -1  138.06    3.56
  -2   8   1  129.24    3.51
   8   1  -2  139.07    3.35
   8  -1   2  138.17    3.28
   1   2  -8  139.66    3.75
  -2  -8  -1  144.82    3.59
  -1  -2  -8  139.94    3.69
  -8  -1  -2  137.16    2.78
   2  -8   1  130.92    3.53
  -3   8  -1  226.36    7.00
   3   8   1  230.10    6.51
  -1   3  -8  225.72    6.90
   1   3   8  245.37    7.35
   8   1   3  230.91    5.30
   3  -8  -1  229.31    6.51
  -8   1  -3  243.33    6.18
   1  -3  -8  238.55    6.59
   8  -1  -3  237.34    6.59
  -3  -8   1  233.81    6.76
   1  -3  -8  245.58    7.44
  -3   8   1  229.51    6.55
   1   3  -8  226.74    6.49
   8  -1   3  249.32    6.04
  -1  -3  -8  253.86    7.62
  -1  -3  -8  239.26    6.85
  -8  -1  -3  211.69    4.81
   3   8  -1  226.11    6.21
   8   1  -3  236.86    6.38
   3  -8   1  226.38    7.00
  -3  -8  -1  235.69    6.67
   8  -1   3  233.25    6.02
   8  -1  -4 1704.60   80.22
   1  -4  -8 1796.36   85.14
  -4  -8   1 1791.25   85.16
   8   1   4 1750.63   80.60
   1  -4  -8 1848.66   87.66
  -4   8  -1 1730.92   84.02
  -1   4  -8 1692.39   80.63
   4   8   1 1693.35   80.11
  -8   1  -4 1726.19   79.60
   1   4   8 1827.21   86.91
   4  -8  -1 1824.11   87.71
   1   4  -8 1770.69   84.47
  -1  -4  -8 1945.96   92.22
  -8  -1  -4 1876.98   82.69
  -1  -4  -8 1881.96   89.40
  -1   4   8 1873.84   89.11
   8  -1   4 1898.84   85.73
   4   8  -1 1831.02   86.05
   4  -8   1 1770.51   85.48
   8   1  -4 1817.54   85.55
  -4   8   1 1902.86   89.05
  -4  -8  -1 1903.45   89.31
   8  -1   4 1760.19   81.15
  -4   8   1 1735.21   83.97
   1   5   8    1.41    0.45
   5   8   1    1.27    0.24
   1  -5  -8    1.56    0.26
   8  -1  -5    1.20    0.22
  -5  -8   1    1.05    0.31
   5  -8  -1    0.58    0.30
  -8   1  -5    0.67    0.21
  -1   5  -8    2.21    0.28
   8   1   5    0.81    0.24
  -5   8   1    1.16    0.14
   8  -1   5    1.12    0.16
   8   1  -5    0.70    0.31
   1   5  -8    1.34    0.50
   8  -1   5    0.88    0.15
  -5  -8  -1    0.93    0.26
  -1  -5  -8    0.99    0.36
  -1   5   8    0.89    0.28
   5  -8   1    0.86    0.30
   5   8  -1    1.17    0.30
  -8  -1  -5    1.06    0.12
  -5   8   1    1.45    0.29
   6   8   1    3.62    0.28
  -6   8  -1    3.40    0.18
  -6   8  -1    3.34    0.40
   1  -6  -8    3.78    0.35
   8  -1  -6    3.27    0.31
   8   1   6    3.99    0.31
  -1   6  -8    3.98    0.40
   6  -8  -1    3.24    0.39
  -8   1  -6    2.93    0.20
   1  -6  -8    3.49    0.41
  -6  -8   1    3.89    0.25
  -6  -8  -1    3.01    0.29
  -8  -1  -6    2.98    0.21
   6   8  -1    4.15    0.36
   6  -8   1    3.17    0.64
  -1  -6  -8    3.09    0.30
   1  -6   8    3.13    0.47
   8   1  -6    3.11    0.29
   8  -1   6    3.46    0.23
   1   6  -8    4.65    0.43
  -1   6   8    2.86    0.39
  -6   8   1    4.10    0.64
   8  -1   6    4.52    0.33
   7   8   1   95.97    2.19
  -1  -7   8   91.83    2.78
  -7   8  -1   88.51    1.64
  -7  -8   1   99.10    2.48
   1   7   8   97.74    2.74
  -7   8  -1   92.52    2.60
   1  -7  -8   95.48    2.57
   7  -8  -1   96.83    2.70
   8   1   7  100.57    2.56
  -8   1  -7   96.28    2.46
  -1   7  -8   93.04    2.66
   8  -1  -7   93.53    2.49
   7   8  -1   95.86    2.43
  -7  -8  -1   97.28    2.26
  -1   7   8   99.47    2.77
   1  -7   8   93.52    3.46
  -1  -7  -8   98.66    2.87
   8   1  -7   96.44    2.49
   1   7  -8   98.45    3.35
   7  -8   1   91.26    3.07
  -7   8   1   98.46    2.72
   8  -1   7   98.09    2.33
  -8  -1  -7   96.15    2.21
   0   8  -2  103.23    2.72
   8   2   0  103.75    2.05
   2   0  -8  101.77    2.61
   8  -2   0  101.02    2.57
  -8   2   0   92.91    2.38
   0  -8   2   95.08    2.55
  -2   0  -8   97.10    2.79
   0  -8  -2   99.21    2.90
   0   8   2   96.36    2.49
  -2   0  -8   96.86    2.89
   8   2   1    9.21    0.17
   2  -1  -8    8.59    0.50
   1  -8  -2    8.40    0.48
   1   8   2    8.62    0.64
  -1   8  -2    9.82    0.52
  -2   1  -8    8.25    0.61
   8  -2  -1    8.51    0.35
  -2   1  -8    8.66    0.46
  -1  -8   2    9.37    0.77
  -8   2  -1    8.49    0.44
   8   2   1    9.63    0.18
  -2  -1  -8    8.84    0.46
  -1  -8  -2    9.17    0.65
   1  -8   2    8.38    0.51
   1   8  -2    8.92    0.76
   8  -2   1   10.14    0.34
  -8   2   1    8.69    0.50
  -1   8   2    8.66    0.74
   8   2  -1    8.64    0.31
   2   8   2  153.06    3.91
  -8   2  -2  158.60    3.99
   8  -2  -2  152.68    4.17
  -2   2  -8  160.93    4.37
   2  -2  -8  165.93    4.40
   2   2   8  162.30    4.29
   2  -8  -2  160.03    4.27
  -2  -8   2  168.58    4.82
  -2   2  -8  150.62    4.06
   2  -2  -8  160.88    4.27
  -2   8  -2  159.93    4.91
   8  -2   2  157.18    3.34
   2   2  -8  160.13    4.45
   2   8  -2  151.56    4.04
   2  -8   2  152.82    4.20
  -2  -8  -2  154.74    3.93
  -2  -2  -8  168.23    4.42
   8   2  -2  163.36    3.74
  -8   2   2  160.28    3.99
  -2   8   2  158.30    4.73
   8  -2   2  161.26    3.84
   3  -8  -2   45.09    1.30
  -3   8  -2   45.01    1.77
  -2   3  -8   43.64    1.25
  -2   3  -8   44.64    1.33
   2  -3  -8   44.35    1.62
   2   3   8   43.21    1.62
  -3  -8   2   47.93    1.58
  -8   2  -3   44.63    1.16
   8  -2  -3   43.83    1.12
   2  -3  -8   46.97    1.32
   3   8   2   43.33    1.30
   3  -8   2   45.95    1.36
  -3   8   2   51.27    1.42
  -2  -3  -8   43.47    1.09
  -2  -3  -8   52.10    1.81
   8  -2   3   45.53    0.85
   3   8  -2   51.43    1.29
  -3   8   2   44.71    1.69
   2   3  -8   48.92    1.42
   8   2  -3   44.96    1.16
  -8   2   3   44.35    1.11
  -3  -8  -2   46.56    1.12
   8  -2   3   47.08    1.03
   8  -2  -4   15.62    0.75
  -2   4  -8   14.54    0.94
  -4   8  -2   13.81    0.98
   4  -8  -2   13.03    1.00
   2  -4  -8   19.47    0.96
  -8   2  -4   13.98    0.57
   2  -4  -8   14.65    0.66
  -4  -8   2   15.15    0.78
   2   4   8   14.65    0.64
   4   8   2   15.55    0.60
  -2  -4  -8   13.58    0.70
  -4   8   2   13.17    0.96
   4   8  -2   14.05    0.75
   8   2  -4   16.73    0.63
  -4   8   2   16.77    0.65
   2  -4   8   15.38    0.72
   4  -8   2   13.44    0.65
   8  -2   4   14.99    0.31
  -4  -8  -2   16.18    0.47
   2   4  -8   14.50    0.70
   8  -2   4   15.89    0.61
  -8   2  -5  149.47    3.90
   2   5   8  151.75    4.68
   2  -5  -8  158.37    4.74
   2  -5  -8  162.18    4.41
   5  -8  -2  155.99    4.86
   5   8   2  147.69    3.77
  -2   5  -8  141.71    3.95
   8  -2  -5  155.25    4.07
   8   2   5  158.23    3.88
  -5  -8   2  152.08    4.29
  -5   8  -2  153.24    4.78
  -8  -2  -5  158.09    3.21
  -2   5   8  163.32    4.47
   8  -2   5  153.28    3.76
   8   2  -5  154.08    4.16
   2  -5   8  155.97    5.08
  -5   8   2  166.56    3.97
  -5   8   2  147.59    4.13
   5   8  -2  162.21    4.11
  -5  -8  -2  153.41    3.67
   2   5  -8  153.35    4.31
   5  -8   2  152.41    4.23
  -2  -5  -8  152.20    4.21
  -2   6  -8 2576.95  140.18
   2   6   8 2624.93  143.99
   6  -8  -2 2680.17  146.96
  -8   2  -6 2616.69  140.96
   8  -2  -6 2589.97  141.29
   2  -6  -8 2783.43  152.35
   6   8   2 2624.26  138.08
  -6   8  -2 2732.44  140.40
  -6  -8   2 2545.81  138.30
  -6   8  -2 2676.51  147.12
   8   2   6 2474.58  132.68
   2  -6  -8 2693.76  147.37
  -6   8   2 2704.22  144.29
   6   8  -2 2522.74  136.98
  -6  -8  -2 2647.46  139.72
  -2   6   8 2717.49  149.43
  -2  -6  -8 2736.57  148.47
   8  -2   6 2683.54  143.80
  -8  -2  -6 2719.42  139.41
  -6   8   2 2570.73  140.05
   6  -8   2 2520.97  138.63
   2   6  -8 2544.63  140.38
   2  -6   8 2711.95  149.85
  -2   7  -8  143.84    4.18
   8   2   7  152.00    4.22
   7   8   2  156.13    3.66
   2   7   8  156.47    4.44
   8  -2  -7  149.17    4.11
  -7   8  -2  151.66    4.33
   7  -8  -2  146.79    4.84
   2  -7  -8  149.13    4.22
  -8   2  -7  159.94    4.33
  -7   8   2  147.40    4.76
  -2   7   8  157.58    4.94
  -8  -2  -7  167.14    3.84
   2   7  -8  155.39    4.46
  -7  -8  -2  160.11    3.76
  -2  -7  -8  153.62    4.04
   7   8  -2  151.46    4.11
   2  -7   8  153.90    4.55
   7  -8   2  141.15    4.05
   8  -2   7  154.08    3.94
  -8   3   0 1031.32   40.62
   8   3   0 1020.83   37.65
   0   8   3 1032.60   41.31
  -3   0  -8 1059.83   41.99
   0  -8   3 1023.50   42.12
   0   8  -3 1070.47   43.07
   8  -3   0 1081.41   42.97
   8   3   0 1137.18   41.59
   8  -3   0 1089.78   39.74
  -3   0  -8 1030.45   40.90
   0  -8  -3 1065.79   42.33
   1   8   3   11.92    0.47
   3  -1  -8   13.12    0.56
  -3   1  -8   12.49    0.75
  -3   1  -8   12.22    0.45
  -8   3  -1   12.55    0.59
  -1  -8   3   12.85    0.88
   3   1   8   13.84    0.75
   8  -3  -1   11.83    0.64
  -1   8  -3   11.66    0.60
   1  -8  -3   12.18    0.53
  -8   3   1   12.22    0.63
   1   8  -3   10.11    0.85
   8   3  -1   12.30    0.33
  -1   8   3   11.81    0.74
   8   3  -1   11.93    0.37
  -1  -8  -3   13.46    0.70
   8  -3   1   13.01    0.61
   1  -8   3   11.53    0.60
  -1   8   3   12.83    0.81
  -3  -1  -8   12.72    0.76
  -3  -1  -8   12.78    0.69
   8  -3  -2 1721.56   80.32
  -2   8  -3 1728.21   81.22
  -8   3  -2 1756.91   81.32
  -3   2  -8 1648.48   77.80
   2   8   3 1688.42   79.04
  -3   2  -8 1662.00   77.44
   3  -2  -8 1779.57   83.99
   3  -2  -8 1810.44   84.30
  -2  -8   3 1756.43   83.03
   2  -8  -3 1720.88   80.25
   3   2   8 1769.18   83.26
   3   2  -8 1724.22   82.13
  -2   8   3 1690.86   79.23
  -8   3   2 1703.51   79.01
  -3  -2  -8 1723.28   80.48
   8   3  -2 1698.45   76.80
  -2   8   3 1792.38   84.03
  -2  -8  -3 1692.80   78.09
   8  -3   2 1734.35   80.33
   2   8  -3 1670.37   78.39
   2  -8   3 1732.51   82.22
   8   3  -2 1757.52   79.38
   3   8   3  222.13    6.09
  -8   3  -3  213.20    5.57
   8  -3  -3  228.11    5.63
  -3  -8   3  219.72    6.57
  -3   3  -8  214.31    5.89
   8  -3  -3  216.16    6.21
   3  -3  -8  231.75    6.38
  -3   8  -3  216.46    6.19
   3   3   8  206.48    6.27
   3  -8  -3  205.39    6.34
   3  -3  -8  217.85    6.57
  -3   3  -8  209.23    5.80
   8   3  -3  202.89    5.50
  -3   8   3  222.51    6.29
   3   3  -8  209.28    6.63
  -8   3   3  215.98    5.84
   3  -8   3  210.51    5.97
  -3  -3  -8  224.30    6.26
   3   8  -3  224.94    6.60
  -3  -3  -8  203.30    5.68
  -3   8   3  203.13    5.81
  -3  -8  -3  215.18    5.94
   8  -3   3  222.41    6.07
   4  -8  -3  229.45    6.60
   8  -3  -4  247.86    6.72
   3  -4  -8  245.99    6.96
  -4   8  -3  229.73    6.72
  -4  -8   3  248.96    6.92
  -3   4  -8  232.82    7.08
  -3   4  -8  223.10    6.23
  -8   3  -4  237.20    6.31
   4   8   3  235.64    6.43
   3  -4  -8  232.84    7.20
   3   4   8  230.39    6.58
   8  -3  -4  231.76    6.46
   3  -4   8  222.18    6.53
   8   3  -4  237.49    6.33
   4   8  -3  234.17    6.93
  -4   8   3  231.60    7.20
   4  -8   3  219.13    6.37
   3   4  -8  232.31    7.38
  -8   3   4  219.03    6.60
  -4   8   3  254.90    6.80
   8  -3   4  230.25    6.49
  -4  -8  -3  243.36    6.59
  -3  -4  -8  234.06    6.54
  -8   3  -5  844.10   32.57
  -5   8  -3  907.58   35.30
   3  -5  -8  912.69   35.15
   3   5   8  902.98   35.70
   8  -3  -5  903.22   34.50
   8   3   5  890.65   33.55
   5  -8  -3  847.38   32.99
   8  -3  -5  834.29   32.08
   3  -5  -8  909.33   35.95
  -3   5  -8  923.52   36.33
   5   8   3  981.51   36.19
  -5  -8   3  898.78   34.37
   5   8  -3  905.03   35.06
   8   3  -5  859.69   32.74
   8  -3   5  921.20   35.01
  -5   8   3  891.32   35.58
   5  -8   3  862.88   33.54
   3  -5   8  913.01   35.58
  -5  -8  -3  861.32   32.10
   3   5  -8  908.21   36.08
  -5   8   3  896.95   33.78
  -3  -5  -8  826.74   31.36
  -3   6  -8  280.65    9.03
  -6  -8   3  289.47    8.30
   3  -6  -8  289.34    8.61
   8   3   6  287.94    8.52
   6  -8  -3  264.21    8.04
   6   8   3  285.84    7.69
  -6   8  -3  285.83    9.23
   8  -3  -6  268.48    8.00
   8  -3  -6  292.99    8.71
   3  -6  -8  281.45    8.47
   3   6   8  282.37    8.48
  -8   3  -6  277.32    8.31
   3   6  -8  281.79    8.55
   8  -3   6  275.47    8.31
  -6  -8  -3  298.13    8.02
  -3   6   8  291.81    9.31
   8   3  -6  277.66    8.10
   3  -6   8  277.00    8.58
   6   8  -3  276.16    8.38
  -6   8   3  289.54    9.36
   6  -8   3  278.56    9.08
  -8  -3  -6  272.73    6.58
  -8  -3  -6  266.44    6.47
  -3  -6  -8  285.12    8.39
  -6   8   3  287.76    8.15
   7  -8  -3 1216.32   53.32
   8   3   7 1342.43   57.08
   3  -7  -8 1237.24   54.25
   7   8   3 1264.83   50.52
   3   7   8 1332.78   57.95
  -3   7  -8 1179.19   51.13
   8  -3  -7 1250.04   53.25
   8  -3  -7 1173.24   50.27
  -8   3  -7 1231.52   51.99
  -7   8  -3 1212.89   53.47
  -8  -3  -7 1103.58   43.72
  -3   7   8 1273.32   55.88
   8   3  -7 1207.91   51.63
  -7  -8  -3 1299.36   52.02
  -3  -7  -8 1200.91   50.64
  -8  -3  -7 1215.18   48.55
  -7   8   3 1200.90   51.96
   3   7  -8 1190.65   51.51
   8  -3   7 1173.13   50.53
   3  -7   8 1227.40   54.42
   7   8  -3 1290.82   54.88
   7  -8   3 1173.83   50.60
   8  -4   0   87.10    2.14
   0  -8  -4   87.09    2.21
   0   8   4   86.94    2.65
   0   8   4   86.55    2.24
   0  -8   4   92.07    2.97
  -4   0  -8   85.34    2.10
   8   4   0   88.21    1.74
  -4   0  -8   90.83    2.22
   0   8  -4   86.45    2.39
  -8   4   0   87.79    2.44
   8   4   0   89.74    1.71
  -4   1  -8  371.51   11.11
   4   1   8  418.96   12.85
   4  -1  -8  407.21   12.91
  -4   1  -8  357.59   11.06
   8  -4  -1  360.46    9.61
  -1  -8   4  368.86   12.10
  -1   8  -4  364.60   12.08
  -8   4  -1  378.56   11.66
   4  -1  -8  369.57   11.30
   1  -8  -4  363.43   11.12
   8  -4  -1  353.58   10.65
   1   8   4  397.93   12.36
   8   4  -1  365.83   10.17
   8  -4   1  364.79   11.27
   1  -8   4  359.15   11.88
  -4  -1  -8  388.56   12.22
  -1   8   4  381.43   11.70
  -8   4   1  365.03   11.02
   1   8  -4  368.13   11.42
  -1   8   4  384.57   12.16
  -1  -8  -4  367.92   11.48
  -4  -1  -8  370.01   11.34
   8  -4  -2   47.60    1.52
   4  -2  -8   44.30    1.27
   2  -8  -4   48.53    1.73
  -2  -8   4   46.54    1.35
   8  -4  -2   47.62    0.98
  -4   2  -8   45.14    1.31
  -8   4  -2   45.34    1.14
   4  -2  -8   50.82    1.72
  -4   2  -8   44.12    1.17
  -2   8  -4   44.60    1.78
   4   2   8   46.59    1.22
   2   8   4   46.67    1.15
   8   4  -2   44.28    1.10
  -4  -2  -8   42.59    1.05
  -2   8   4   49.64    1.75
   2   8  -4   46.92    1.70
   8  -4   2   43.90    1.40
   2  -8   4   47.05    1.85
  -8   4   2   46.32    1.21
  -2   8   4   51.25    1.60
  -2  -8  -4   44.91    1.38
   8  -4  -3  732.62   27.08
  -3   8  -4  710.11   26.31
  -4   3  -8  719.06   25.97
   4   3   8  728.61   26.37
   8  -4  -3  729.97   25.27
   3   8   4  742.98   26.29
   4  -3  -8  820.07   30.20
  -3  -8   4  775.97   28.28
   3  -8  -4  756.46   27.60
  -4   3  -8  673.78   23.78
  -8   4  -3  764.46   27.80
   4  -3  -8  753.21   27.47
  -8   4   3  725.69   26.26
   3   8  -4  758.21   27.60
  -3   8   4  729.75   26.83
  -3  -8  -4  730.39   26.26
   4   3  -8  698.20   25.88
   3  -8   4  719.72   26.38
  -3   8   4  745.46   26.89
   8  -4   3  703.30   25.18
  -4  -3  -8  727.62   26.02
   8   4  -3  733.73   25.96
   4   8   4  173.01    4.55
   4  -4  -8  186.79    5.50
  -4   8  -4  165.21    4.74
   8  -4  -4  164.28    4.47
  -8   4  -4  173.47    4.52
   4  -4  -8  180.26    5.48
  -4  -8   4  171.07    5.25
  -4   4  -8  165.63    5.01
   4  -8  -4  180.45    5.01
   4   4   8  184.29    4.96
   8  -4  -4  179.15    4.60
  -4   4  -8  167.40    4.19
   8   4  -4  176.83    4.77
  -4  -4  -8  174.85    4.59
  -4   8   4  176.87    4.62
   4  -8   4  169.10    4.80
  -8   4   4  175.84    5.18
   4   8  -4  171.05    4.65
   8  -4   4  166.75    4.37
   4   4  -8  164.38    5.29
  -4  -8  -4  173.33    4.30
   4  -4   8  171.44    5.39
  -4   8   4  167.83    5.27
   5   8   4  168.26    4.00
   4   5   8  162.01    4.48
   4  -5  -8  173.06    5.16
  -5  -8   4  154.44    4.25
  -4   5  -8  146.77    3.92
  -5   8  -4  157.07    4.47
  -4   5  -8  159.76    4.41
  -8   4  -5  160.28    4.19
   4  -5  -8  160.81    4.53
   5  -8  -4  158.78    4.46
   8  -4  -5  159.27    4.79
   8  -4  -5  165.70    4.41
  -5  -8  -4  160.35    4.04
   5  -8   4  162.13    4.56
   8  -4   5  159.50    4.19
  -5   8   4  174.01    4.73
   5   8  -4  158.99    4.27
   4  -5   8  151.89    4.41
  -8   4   5  160.10    4.83
   8   4  -5  150.37    4.37
   4   5  -8  160.20    5.15
  -5   8   4  156.16    4.45
  -4  -5  -8  161.33    4.01
   6  -8  -4 1618.72   75.86
  -6   8  -4 1545.33   73.18
   8  -4  -6 1538.04   70.78
  -4   6  -8 1517.46   70.45
   8   4   6 1586.82   73.46
   6   8   4 1640.70   72.15
  -8   4  -6 1643.14   76.05
   4   6   8 1735.94   80.70
   4  -6  -8 1672.12   77.80
   4  -6  -8 1556.51   73.31
   8  -4  -6 1660.55   76.24
  -4  -6  -8 1579.59   71.80
   8  -4   6 1628.30   74.31
   4   6  -8 1579.49   73.04
  -8  -4  -6 1472.57   60.34
  -6  -8  -4 1540.81   68.46
  -6   8   4 1632.86   74.91
   6  -8   4 1482.62   70.10
  -6   8   4 1547.87   71.82
   6   8  -4 1507.63   70.27
   8   4  -6 1498.21   69.81
   4  -6   8 1470.90   68.83
   8  -4  -7   24.55    1.26
  -7   8  -4   23.97    1.35
  -7   8  -4   25.80    0.37
   7   8   4   24.29    0.54
   7  -8  -4   23.12    0.94
   4  -7  -8   26.75    0.92
  -4   7  -8   22.42    1.39
   4   7   8   24.03    0.98
   8   4   7   24.17    1.11
  -8   4  -7   22.93    1.04
   8  -4  -7   26.09    1.06
   4  -7  -8   26.95    1.03
   8   4  -7   24.19    1.22
   4   7  -8   26.43    1.38
  -8  -4  -7   23.76    0.46
  -8  -4  -7   24.18    0.47
   7  -8   4   23.32    0.94
   8  -4   7   25.01    1.16
  -7   8   4   24.27    0.99
   7   8  -4   24.78    1.02
   4  -7   8   24.56    1.54
  -4  -7  -8   25.72    0.87
  -7  -8  -4   24.41    0.59
   8  -5   0  296.76    9.10
  -8   5   0  287.36    8.89
   0   8   5  294.18    9.34
   0   8  -5  306.48    9.24
   0   8   5  290.12    8.59
  -5   0  -8  310.40    9.27
   8   5   0  296.35    7.50
   0  -8  -5  303.12    9.34
   0  -8   5  303.72    9.20
  -5   0  -8  304.98    8.90
   1   8   5 1369.94   61.01
  -5   1  -8 1408.61   61.53
   5   1   8 1444.58   63.38
  -1  -8   5 1459.27   65.04
  -8   5  -1 1461.98   65.13
   1  -8  -5 1445.23   63.90
  -5   1  -8 1378.31   60.45
  -1   8  -5 1475.63   65.75
   5  -1  -8 1392.42   61.89
   1   8   5 1480.60   66.02
   8  -5  -1 1412.65   62.30
   8  -5   1 1442.23   64.36
  -1  -8  -5 1506.12   66.91
   1   8  -5 1533.20   69.21
  -5  -1  -8 1441.55   62.43
   1  -8   5 1417.69   63.34
  -1   8   5 1422.15   64.11
   8   5  -1 1394.90   58.96
  -8   5   1 1397.24   61.87
  -1   8   5 1477.08   65.30
   5   2   8  580.85   19.64
   5  -2  -8  624.90   21.27
   8  -5  -2  541.63   17.05
  -2  -8   5  575.00   20.86
   2  -8  -5  562.35   20.04
   8  -5  -2  561.04   19.20
  -5   2  -8  624.79   20.87
  -5   2  -8  574.40   19.83
   5  -2  -8  569.28   20.21
  -8   5  -2  589.57   20.48
   2   8   5  619.63   21.18
  -2   8  -5  601.40   20.87
   2   8   5  548.67   19.05
   2   8  -5  575.58   19.98
  -2  -8  -5  554.91   18.67
   8   5  -2  578.85   18.84
  -8   5   2  568.17   19.43
  -2   8   5  585.35   20.90
  -5  -2  -8  590.89   19.70
  -2   8   5  590.30   20.20
   8  -5   2  573.53   19.97
   2  -8   5  581.93   21.00
  -5   3  -8  370.90   11.59
   5   3   8  344.68   10.47
   3  -8  -5  344.98   10.72
  -3   8  -5  359.93   11.25
   5  -3  -8  387.34   11.73
   8  -5  -3  339.66    9.66
  -3  -8   5  340.62   11.35
   8  -5  -3  335.89   10.29
   3   8   5  368.41   11.09
  -8   5  -3  360.92   10.89
   5  -3  -8  347.92   10.73
  -5   3  -8  347.05   10.00
  -3   8   5  354.90   11.05
   5  -3   8  339.19   10.99
  -3  -8  -5  346.29   10.48
   3   8  -5  347.61   11.32
   8  -5   3  342.53   10.86
  -5  -3  -8  338.52   10.08
   5   3  -8  366.39   11.36
  -3   8   5  374.13   11.31
  -5  -3  -8  353.47   10.36
  -8   5   3  339.21   11.00
   8   5  -3  352.35   10.08
   3  -8   5  354.00   11.07
   4   8   5  388.36   11.71
   8  -5  -4  374.92   11.18
  -4  -8   5  391.77   13.00
   5  -4  -8  404.03   12.50
   5  -4  -8  350.97   11.14
  -5   4  -8  361.73   11.83
   5   4   8  363.09   11.35
   4  -8  -5  367.36   11.67
  -5   4  -8  374.15   11.22
  -4   8  -5  380.29   12.17
   8  -5  -4  371.38   11.65
  -8   5  -4  381.57   12.22
   5   4  -8  388.35   12.94
  -4  -8  -5  385.65   11.32
  -4   8   5  399.82   12.24
  -5  -4  -8  351.40   10.58
  -4   8   5  366.43   11.72
   8   5  -4  371.39   11.47
   4  -8   5  364.27   11.64
   4   8  -5  380.58   12.42
   8  -5   4  383.90   12.26
   5  -4   8  391.52   12.94
  -8   5   4  377.60   11.84
  -5   5  -8  377.85   12.07
   8  -5  -5  372.29   12.50
   5  -5  -8  421.45   13.17
  -5  -8   5  383.54   12.85
  -5   5  -8  409.37   12.26
   5  -8  -5  379.66   12.97
  -8   5  -5  378.41   12.40
  -5   8  -5  403.04   12.99
   5   8   5  386.53   11.60
   8  -5  -5  387.21   11.57
   5  -5  -8  385.59   12.32
   5   5   8  389.04   12.36
  -8   5   5  380.15   12.16
   5   8  -5  370.76   12.32
   8   5  -5  383.14   12.26
   5   5  -8  398.44   13.44
   5  -5   8  394.73   12.69
   8  -5   5  382.84   12.48
  -5  -5  -8  387.45   11.42
  -5   8   5  400.46   12.88
  -5  -8  -5  394.63   11.78
   5  -8   5  380.46   12.23
  -5   8   5  401.10   12.39
   5  -6  -8    5.35    0.79
  -6   8  -5    4.71    0.77
   8  -5  -6    4.40    0.48
   5   6   8    4.74    0.46
   8  -5  -6    5.92    0.46
  -5   6  -8    4.49    0.24
  -5   6  -8    4.53    0.73
  -8   5  -6    5.01    0.60
   6  -8  -5    5.93    0.51
   8   5   6    5.19    0.41
   6  -8   5    4.44    0.48
   8   5  -6    5.04    0.59
  -5  -6  -8    4.88    0.36
   8  -5   6    4.23    0.39
  -6  -8  -5    4.31    0.30
   5  -6   8    4.05    0.51
  -6   8   5    4.83    0.80
  -8   5   6    4.24    0.45
   8   5  -6    5.08    0.58
   5  -7  -8  116.53    3.21
   8   5   7  111.35    3.64
  -8   5  -7  110.94    3.06
  -7   8  -5  107.61    3.21
  -5   7  -8  116.59    3.92
  -7   8  -5  114.96    2.28
   5  -7  -8  113.83    4.00
   5   7   8  114.19    3.36
   7  -8  -5  110.41    3.90
   8  -5  -7  106.12    3.11
   8  -5  -7  112.14    2.94
  -7   8   5  112.45    3.96
   7   8  -5  116.16    3.10
  -8  -5  -7  115.87    2.34
   8  -5   7  111.85    3.14
   5   7  -8  107.21    3.75
   8   5  -7  104.05    2.96
  -8  -5  -7  117.22    2.35
  -7  -8  -5  119.62    2.68
   5  -7   8  112.37    4.15
   7  -8   5  105.07    3.75
  -5  -7  -8  113.96    2.98
  -8   6   0 4152.12  265.44
   0  -8   6 4178.64  269.25
   0  -8  -6 4096.21  262.02
   0   8   6 4099.93  262.39
   8   6   0 4250.20  259.24
   6   0   8 4253.97  270.05
   8  -6   0 4110.45  260.65
   0   8  -6 4412.87  282.95
  -6   0  -8 4134.62  259.17
   6   0  -8 4193.22  267.50
   0   8   6 4163.95  266.78
   6  -1  -8  233.82    6.71
   1   8   6  236.25    6.65
   1   8   6  226.84    7.26
   8   6   1  230.65    5.27
  -1  -8   6  233.41    7.69
   6   1   8  224.73    6.60
   8  -6  -1  230.35    6.62
  -1   8  -6  242.30    7.85
  -6   1  -8  249.80    6.70
   1  -8  -6  228.80    6.59
  -8   6  -1  236.25    7.20
  -6   1  -8  240.23    6.79
  -6  -1  -8  233.53    6.40
  -1   8   6  228.93    6.64
  -1  -8  -6  245.86    7.18
   1   8  -6  241.95    7.11
  -8   6   1  231.33    7.15
   1  -8   6  237.67    7.79
   8  -6   1  226.92    6.98
  -1   8   6  242.40    6.98
   8   6  -1  250.23    6.38
   6  -2  -8  244.55    6.86
  -2  -8   6  233.63    6.89
   6  -2  -8  222.44    6.90
  -2   8  -6  214.09    7.00
   8  -6  -2  218.24    6.24
   6   2   8  219.91    6.09
   2   8   6  221.08    7.02
  -6   2  -8  214.49    6.28
   2   8   6  225.57    6.56
  -8   6  -2  223.04    6.34
   2  -8  -6  225.71    7.01
  -6   2  -8  244.16    6.64
   2  -8   6  220.17    6.55
  -8   6   2  221.70    6.38
  -2  -8  -6  232.76    6.67
  -6  -2  -8  223.17    5.78
   2   8  -6  230.22    7.24
   8   6  -2  228.14    6.07
  -2   8   6  237.20    6.75
  -2   8   6  224.06    7.02
   8  -6   2  221.68    6.28
   8  -6  -3   73.63    2.46
  -6   3  -8   71.31    1.82
   6  -3  -8   67.03    1.92
   3  -8  -6   70.38    2.47
  -3   8  -6   70.24    2.61
   3   8   6   71.95    1.74
  -8   6  -3   72.58    1.96
   6   3   8   72.21    1.89
   3   8   6   79.99    2.20
   8  -6  -3   69.36    1.61
  -3  -8   6   76.16    2.20
   6  -3  -8   76.58    2.03
  -6   3  -8   68.29    2.11
  -6  -3  -8   71.55    1.71
  -3   8   6   74.69    2.00
   6   3  -8   74.53    2.55
   8   6  -3   72.07    1.66
   3   8  -6   71.26    2.02
   8  -6   3   72.71    2.36
  -6  -3  -8   70.88    1.75
  -3  -8  -6   67.75    1.94
  -3   8   6   73.02    2.53
   3  -8   6   72.38    2.65
  -8   6   3   68.30    2.34
   6  -3   8   79.35    2.41
  -4   8  -6 2054.14  104.11
   6   4   8 2049.08  102.78
   6  -4  -8 2074.72  103.17
  -4  -8   6 1958.39   98.73
   6  -4  -8 1951.24   97.45
   8  -6  -4 1902.71   96.37
   8  -6  -4 2052.62   99.92
  -8   6  -4 1918.12   97.20
   4   8   6 2000.97  101.35
   4   8   6 2032.63   99.16
  -6   4  -8 1961.29   94.85
   4  -8  -6 1991.32   99.67
  -6   4  -8 2065.33  102.74
   6   4  -8 2117.19  106.78
   8   6  -4 1931.35   94.94
  -6  -4  -8 2010.49   97.22
   8  -6   4 1931.84   96.42
  -8   6   4 1981.17   99.05
   4  -8   6 2051.74  103.92
  -4   8   6 1994.97  100.07
   4   8  -6 2080.84  103.78
   6  -4   8 2096.45  105.70
  -4  -8  -6 2030.57   99.82
  -6  -4  -8 2019.04   97.87
  -4   8   6 2092.93  105.91
   6  -5  -8   52.18    1.48
   6  -5  -8   48.13    1.55
   8  -6  -5   51.42    1.55
  -5   8  -6   50.77    1.65
   6   5   8   50.27    1.52
  -6   5  -8   46.40    1.22
   5  -8  -6   49.56    1.62
   8  -6  -5   50.86    1.42
  -6   5  -8   52.12    1.50
   5   8   6   48.37    2.10
  -8   6  -5   49.56    1.85
   5   8  -6   50.00    1.49
   8   6  -5   50.55    1.62
  -5  -8  -6   50.76    1.16
   6  -5   8   49.91    1.54
  -6  -5  -8   49.92    1.24
   8  -6   5   49.31    1.86
  -8   6   5   49.12    1.52
  -5   8   6   51.71    1.41
   5  -8   6   51.04    2.15
   6   5  -8   52.23    2.08
  -5   8   6   49.16    1.59
  -6   8  -6  106.46    3.17
   8   6   6  103.63    2.92
   6   8   6  103.63    3.07
  -6   6  -8  104.94    2.98
   8  -6  -6   98.11    2.92
  -6   6  -8  101.40    2.31
  -8   6  -6   97.80    3.32
   8  -6  -6  100.47    2.86
   6  -8  -6   98.77    3.60
   6  -6  -8  101.67    3.60
   6   6   8  103.56    2.99
   6  -6  -8  100.72    2.78
   8  -6   6  101.16    3.38
   6  -6   8   95.73    2.93
  -6  -6  -8  102.77    2.53
  -8   6   6  100.01    2.96
   6   8  -6  102.61    3.34
   6   6  -8   99.15    3.48
  -6  -8  -6  101.23    2.47
   8   6  -6  112.26    2.94
   6  -8   6   97.17    2.98
  -8  -6  -6  112.34    2.02
  -6   8   6  102.43    3.08
  -8  -6  -6  106.07    1.90
  -7   8  -6  234.70    8.05
   7  -8  -6  229.42    7.18
   6  -7  -8  261.96    7.57
   8   6   7  231.74    7.79
   8  -6  -7  230.71    7.16
   8  -6  -7  242.19    7.37
  -6   7  -8  243.43    7.46
   6   7   8  230.00    7.11
  -8   6  -7  245.78    7.38
   6  -7  -8  220.00    6.89
  -6   7  -8  239.16    6.61
  -7   8  -6  225.58    5.49
   7  -8   6  233.60    8.03
  -7   8   6  233.05    8.07
   8   6  -7  230.46    6.92
  -6  -7  -8  226.84    6.33
   8  -6   7  230.12    7.74
  -7  -8  -6  238.13    6.18
  -8  -6  -7  258.65    6.16
   7   8  -6  238.35    7.05
   6   7  -8  226.53    6.97
   6  -7   8  235.05    7.41
  -8  -6  -7  242.85    5.82
   0  -8  -7  188.76    5.27
   8  -7   0  196.73    6.09
   7   0   8  199.92    5.42
  -8   7   0  182.17    5.23
   0   8   7  189.39    5.73
   7   0  -8  183.92    5.68
   8   7   0  196.40    4.74
   0   8  -7  197.86    6.35
  -7   0  -8  196.66    5.26
   0   8   7  191.02    5.49
   0  -8   7  177.56    6.18
  -1   8  -7  354.48   12.22
   1  -8  -7  354.02   11.62
   1   8   7  354.76   11.38
   7  -1  -8  355.39   11.06
   7   1   8  360.58   11.16
  -1  -8   7  363.31   12.62
  -8   7  -1  343.10   10.83
  -7   1  -8  368.05   11.20
   8   7   1  385.37   10.31
   1   8   7  353.55   11.22
   8  -7  -1  346.48   11.55
  -1   8   7  357.65   11.77
  -1   8   7  360.22   11.37
   1   8  -7  377.05   11.94
  -1  -8  -7  360.97   11.55
   1  -8   7  336.56   11.02
  -7  -1  -8  365.37   10.73
   8  -7   1  360.35   11.84
   8   7  -1  346.83    9.85
  -8   7   1  363.48   11.95
  -8   7  -2  478.54   15.87
   2  -8  -7  487.81   16.77
   2   8   7  474.47   15.87
   7   2   8  462.60   14.93
  -7   2  -8  458.10   14.76
   7  -2  -8  452.37   15.06
   8  -7  -2  452.35   15.10
  -2  -8   7  462.98   16.68
  -2   8  -7  456.41   16.31
   7  -2  -8  501.20   16.45
   8   7   2  461.55   12.98
   2   8   7  479.32   15.93
  -8   7   2  478.60   15.96
  -2   8   7  484.63   16.78
   2   8  -7  464.48   16.49
  -7  -2  -8  467.29   14.53
   8  -7   2  477.77   16.42
  -2   8   7  487.29   16.84
   8   7  -2  487.41   15.49
  -2  -8  -7  460.15   15.40
   2  -8   7  453.67   16.45
   7  -3  -8  417.66   13.06
   7   3   8  378.80   11.82
   7  -3  -8  393.00   13.15
  -3   8  -7  370.32   12.12
   3  -8  -7  395.78   13.34
  -3  -8   7  368.99   12.24
  -7   3  -8  407.13   12.24
  -7   3  -8  382.52   11.90
  -8   7  -3  390.11   13.13
   3   8   7  391.22   13.36
   8  -7  -3  391.83   12.49
   7   3  -8  365.43   11.89
   3  -8   7  380.99   12.50
  -3   8   7  409.23   13.68
  -7  -3  -8  393.27   11.46
   3   8  -7  384.58   13.17
  -3   8   7  391.77   12.63
  -3  -8  -7  395.64   12.07
   7  -3   8  400.37   12.53
   8   7  -3  380.45   11.85
  -7  -3  -8  375.91   11.07
  -8   7   3  378.28   12.20
   8  -7   3  378.67   12.81
   4  -8  -7   72.02    2.72
   7  -4  -8   68.64    2.56
   7   4   8   73.34    2.42
  -8   7  -4   71.71    2.49
   8  -7  -4   71.40    2.11
   4   8   7   71.75    2.16
  -7   4  -8   71.04    2.28
  -4   8  -7   73.58    2.79
   7  -4  -8   78.89    2.09
  -7   4  -8   74.34    1.80
   8   7  -4   76.70    1.88
  -7  -4  -8   71.01    1.49
   4  -8   7   74.41    2.27
   4   8  -7   73.90    2.66
   7  -4   8   71.61    2.02
  -4  -8  -7   74.87    1.79
  -4   8   7   74.72    2.50
  -7  -4  -8   74.76    1.71
  -4   8   7   72.10    2.18
  -8   7   4   71.77    2.61
   8  -7   4   70.14    2.50
   7   4  -8   71.32    2.13
   8  -7  -5  558.89   20.92
   7  -5  -8  617.05   21.45
   5   8   7  596.95   21.29
   5  -8  -7  585.85   21.01
  -7   5  -8  588.80   20.74
   8  -7  -5  563.10   19.35
   7  -5  -8  584.74   21.63
  -8   7  -5  616.67   22.66
  -7   5  -8  585.46   19.25
   7   5   8  577.49   20.34
  -5   8  -7  616.98   22.89
   8  -7   5  561.65   19.94
   5   8  -7  583.13   21.58
  -8  -7  -5  535.30   15.65
   7   5  -8  572.34   20.43
   7  -5   8  608.97   22.32
  -7  -5  -8  593.52   19.38
  -5  -8  -7  569.90   19.47
   8   7  -5  586.60   20.79
  -7  -5  -8  576.83   18.77
  -8   7   5  594.16   22.03
   5  -8   7  596.44   21.43
  -5   8   7  599.39   22.38
   7  -6  -8   95.15    2.61
  -7   6  -8   92.01    2.69
  -7   6  -8   89.53    2.12
  -8   7  -6  101.05    2.90
   7   6   8   95.01    3.40
   8  -7  -6   86.07    2.56
   8  -7  -6   92.02    3.44
   6  -8  -7   90.45    3.52
  -6   8  -7   94.46    2.88
   7  -6  -8   88.56    2.74
  -6  -8  -7   96.37    2.38
  -7  -6  -8   87.20    2.08
   7  -6   8   88.72    3.40
   6   8  -7   85.89    3.11
   8   7  -6   88.85    2.94
   6  -8   7   89.46    3.55
   8  -7   6   89.98    3.31
  -8  -7  -6  103.45    2.01
  -8   7   6   90.86    3.44
  -6   8   7   92.07    2.85
   7   6  -8   87.86    3.19
  -7   8  -7    0.87    0.67
   8   7   7    1.75    0.65
  -7   7  -8    1.38    0.62
  -8   7  -7    1.27    0.12
   8  -7  -7    1.50    0.28
   7   7   8    0.93    0.66
   8  -7  -7    0.75    0.67
   7  -7  -8    0.75    0.32
   7  -8  -7    0.55    0.44
  -8   7  -7    0.85    0.59
  -7   8  -7    0.80    0.15
   7  -7  -8    0.89    0.43
   7   8   7    0.92    0.70
  -7   7  -8    0.96    0.18
  -7   8   7    1.06    0.43
   7  -8   7    0.69    0.42
   8  -7   7    1.08    0.63
  -8  -7  -7    0.66    0.13
   8   7  -7    0.58    0.33
  -8  -7  -7    0.65    0.13
  -7  -8  -7    0.57    0.20
   7   7  -8    0.66    0.59
   7  -7   8    0.66    0.43
  -7  -7  -8    1.76    0.21
   8   0   8    1.62    0.30
   8   8   0    1.49    0.21
   0  -8  -8    2.50    0.30
   8   0  -8    1.04    0.49
   8  -8   0    1.83    0.57
   0   8  -8    1.54    0.41
  -8   0  -8    2.28    0.29
   0  -8   8    1.83    0.73
  -8   8   0    1.95    0.56
   1  -8  -8 1736.21   84.31
   8   1   8 1741.19   82.77
   8   8   1 1841.48   82.81
  -8   8  -1 1703.39   82.03
   1   8   8 1748.62   85.41
   8  -1  -8 1747.49   83.19
   8  -8  -1 1764.77   85.70
  -1   8  -8 1743.88   83.76
  -8   1  -8 1798.77   85.08
  -1  -8   8 1695.38   84.27
  -1  -8  -8 1678.58   81.39
   1   8  -8 1701.73   83.78
  -8  -1  -8 1663.40   77.32
   8   1  -8 1806.68   86.82
  -1   8   8 1759.38   84.20
   1  -8   8 1746.97   84.56
  -8  -8  -1 1710.89   76.74
   8  -8   1 1708.22   83.40
  -1   8   8 1756.61   84.38
   8   8  -1 1679.99   77.81
  -8   8   1 1774.47   86.41
   8   2   8    8.48    0.42
   8  -8  -2    8.62    0.61
  -8   8  -2    8.33    0.59
   2  -8  -8    9.14    0.86
  -2   8  -8   10.27    1.04
  -8   2  -8    9.61    0.59
   8   8   2    9.75    0.27
   2   8   8    9.18    0.65
  -2  -8   8    8.45    0.70
   8  -2  -8    8.08    0.54
   8  -2  -8    8.66    0.52
  -2  -8  -8    8.73    0.46
  -8   8   2    8.37    0.58
  -2   8   8   11.93    0.62
  -2   8   8    8.82    0.56
  -8  -8  -2   10.60    0.29
   8   8  -2    8.94    0.50
   8  -8   2    8.40    0.59
  -8  -2  -8    9.63    0.37
   2  -8   8    9.87    1.15
   8  -8  -3  238.78    7.17
   8   3   8  238.13    6.79
   8  -3  -8  240.71    7.14
   8  -3  -8  246.84    7.11
  -8   3  -8  232.04    6.61
   3   8   8  222.41    7.63
  -8   8  -3  230.56    6.98
   8   8   3  241.90    5.72
   3  -8  -8  231.03    7.67
  -3   8  -8  240.10    8.04
  -3  -8  -8  224.29    6.77
   8   3  -8  228.60    7.50
  -8  -3  -8  234.00    6.01
   8   8  -3  246.75    6.79
   8  -3   8  239.15    7.33
  -8  -8  -3  240.27    5.86
  -8  -3  -8  243.50    6.18
  -3   8   8  244.67    7.91
  -8   8   3  236.97    7.18
  -3   8   8  236.09    7.73
   3   8  -8  241.03    7.32
   8  -8   3  225.43    6.85
   3  -8   8  225.44    7.14
   4  -8  -8   73.49    2.31
   8  -4  -8   72.93    2.21
  -8   8  -4   80.23    2.36
   8  -8  -4   71.92    2.86
   8   4   8   78.65    2.18
  -4   8  -8   76.74    2.99
   8  -4  -8   77.67    2.11
  -8   4  -8   74.00    2.04
   4   8   8   76.66    2.39
  -8   8   4   76.13    2.29
   8   4  -8   73.57    2.75
  -4  -8  -8   73.75    1.86
   8  -8   4   71.54    2.79
   8  -4   8   75.88    2.58
   4  -8   8   76.45    2.54
  -8  -4  -8   76.95    1.65
  -4   8   8   78.35    2.79
  -8  -4  -8   81.14    1.70
  -8  -8  -4   81.81    1.62
   4   8  -8   74.06    2.27
   8   8  -4   77.52    2.29
  -4   8   8   74.33    2.85
  -5   8  -8  882.63   34.81
   8  -5  -8  850.12   32.77
   8   5   8  844.11   32.78
   8  -8  -5  803.96   31.85
   5  -8  -8  835.31   34.25
  -8   5  -8  861.55   34.38
  -8   8  -5  823.81   33.77
   5   8   8  818.40   32.35
   8  -5  -8  826.25   33.51
   5  -8   8  817.23   34.12
  -8  -8  -5  902.64   31.37
  -5  -8  -8  811.87   30.94
  -8  -5  -8  784.39   28.04
   8  -5   8  854.05   33.40
   8  -8   5  836.51   33.86
  -5   8   8  859.75   35.07
   8   8  -5  883.42   34.57
  -8   8   5  861.15   33.94
   8   5  -8  835.13   33.62
  -8  -5  -8  811.99   28.98
   5   8  -8  839.34   32.98
   8  -6  -8   18.19    1.44
   8  -6  -8   17.65    1.07
  -6   8  -8   20.67    0.68
  -8   6  -8   17.42    0.50
   8  -8  -6   16.26    0.96
   6   8   8   17.91    0.98
  -8   6  -8   17.85    0.84
  -6   8  -8   18.75    0.95
  -8   8  -6   18.25    0.91
   8   6   8   16.72    0.84
   6  -8  -8   17.71    1.02
  -8  -8  -6   18.96    0.44
  -8   8   6   17.77    0.94
   6  -8   8   17.03    1.61
  -6  -8  -8   18.84    0.69
  -8  -6  -8   17.31    0.46
  -8  -6  -8   17.24    0.44
   6   8  -8   16.90    1.33
   8  -8   6   16.67    0.94
   8   8  -6   17.33    1.07
   8   6  -8   17.05    1.24
  -6   8   8   17.82    1.44
   8  -6   8   17.51    0.91
  -7   8  -8  868.95   31.68
  -8   8  -7  838.14   28.90
  -8   7  -8  832.42   34.58
   8  -8  -7  800.29   32.24
   8  -7  -8  793.04   31.93
  -8   7  -8  816.85   29.26
   8   8   7  855.98   34.08
  -7   8  -8  870.97   35.94
  -8   8  -7  829.49   34.59
   7   8   8  902.60   37.20
   7  -8  -8  853.36   33.16
   7  -8  -8  792.83   33.47
   8  -7  -8  826.92   33.12
   8   7   8  839.28   33.36
  -8  -8  -7  853.53   30.19
   7  -8   8  841.32   33.77
  -7  -8  -8  864.18   31.78
  -7   8   8  843.65   33.96
   8  -8   7  841.60   35.02
   7   8  -8  810.42   32.25
  -8  -7  -8  806.05   28.94
   8   7  -8  828.76   32.81
   8  -7   8  823.73   33.13
  -8   8   7  841.21   33.80
   8   8  -7  838.90   33.00
  -8  -7  -8  823.48   29.56
   8   8   8  288.48    9.61
  -8   8  -8  298.75    7.90
  -8   8  -8  292.06    9.67
   8  -8  -8  273.49   10.49
   8  -8  -8  279.28    9.32
  -8  -8  -8  279.33    7.65
   8   8  -8  283.53   10.09
   8  -8   8  290.33    9.69
   0  -9   0   19.55    0.72
   0   0  -9   21.20    0.72
   9   0   0   21.97    0.58
   0   9   0   20.81    1.07
   1  -9   0  352.05   10.84
   0   1  -9  333.92   10.78
  -1   9   0  366.72   11.88
   0   1  -9  369.61   11.35
  -1  -9   0  354.47   10.79
   0  -1  -9  371.25   11.87
   9   0  -1  361.29   10.18
   9   0   1  364.77   10.12
  -9   0  -1  363.98   10.06
   1   9   0  362.72   11.54
   9   0   2   11.88    0.35
   9   0  -2   12.10    0.52
   2  -9   0   12.29    0.91
  -2   9   0   11.08    0.58
   0   2  -9   12.50    0.61
   2   9   0   11.65    0.49
  -9   0  -2   13.66    0.34
  -2  -9   0   11.29    0.75
   0  -2  -9   12.01    0.59
  -3   9   0    3.01    0.62
   9   0  -3    3.48    0.23
   3  -9   0    4.74    0.65
  -9   0  -3    3.09    0.17
   3   9   0    3.28    0.30
   0  -3  -9    4.94    0.63
   0  -3  -9    3.23    0.31
   9   0   3    4.39    0.20
  -3  -9   0    4.43    0.47
   0   3  -9    3.74    0.40
   4   9   0  750.83   27.35
   9   0   4  736.70   24.81
   9   0   4  716.23   24.87
   0   4   9  800.82   30.06
   4  -9   0  737.44   27.09
   0   4  -9  689.59   26.34
  -9   0  -4  705.36   23.82
  -4   9   0  735.36   27.13
   9   0  -4  720.97   26.16
  -4  -9   0  763.35   27.78
   0  -4  -9  726.58   26.47
   0  -4  -9  763.28   28.03
   9   0  -5  209.36    5.71
   9   0   5  214.31    5.60
  -5   9   0  235.83    6.12
   5   9   0  214.94    6.06
  -9   0  -5  207.83    5.19
   0  -5  -9  220.67    6.67
  -5  -9   0  218.78    6.21
   5  -9   0  209.77    6.74
   0   5  -9  209.37    6.14
   0   5   9  221.96    6.42
   9   0   5  215.16    5.36
  -5   9   0  209.73    6.21
   0  -5  -9  229.03    6.64
   9   0   6 1474.00   64.41
   0   6   9 1504.09   68.06
  -6   9   0 1492.65   64.71
  -6   9   0 1420.60   64.68
   6   9   0 1468.33   65.24
  -9   0  -6 1421.88   61.27
  -6  -9   0 1549.33   68.52
   0  -6  -9 1525.65   69.53
   6  -9   0 1392.84   63.13
   0   6  -9 1370.33   62.36
   9   0  -6 1447.37   64.69
  -7  -9   0  300.91    8.54
   0  -7  -9  259.91    8.42
   0   7   9  274.83    9.23
  -9   0  -7  289.26    7.95
   7   9   0  278.99    7.98
   9   0  -7  275.36    8.16
   0  -7   9  278.80    8.88
  -7   9   0  279.79    9.31
   9   0   7  267.06    7.60
   7  -9   0  262.76    8.14
   0   7  -9  285.59    8.86
  -7   9   0  284.85    7.39
   0   8   9  302.62    9.58
   9   0  -8  302.54    9.24
   8   9   0  294.89    8.43
  -8  -9   0  304.36    8.70
   9   0   8  292.27    8.35
  -8   9   0  301.86    9.56
   0  -8   9  306.21   10.06
  -9   0  -8  308.32    8.90
   0   8  -9  304.71    9.78
   0  -8  -9  295.00    9.13
   8  -9   0  290.71    9.20
   0  -9   1  524.19   17.55
   1   0  -9  556.52   19.06
  -1   0  -9  534.05   18.25
  -1   0  -9  524.79   18.15
  -9   1   0  529.04   16.89
   9   1   0  542.65   16.59
   9  -1   0  537.71   16.82
   0   9   1  503.37   16.90
   0  -9  -1  518.70   17.89
   0   9  -1  547.92   18.36
   1   9   1    1.76    0.42
  -9   1  -1    1.72    0.14
  -1   1  -9    2.62    0.49
  -1   9  -1    1.72    0.49
  -1   1  -9    1.42    0.25
   9   1   1    1.99    0.13
   1  -1  -9    1.87    0.29
  -1  -9   1    2.26    0.29
   1  -9  -1    1.64    0.28
   9  -1  -1    0.93    0.17
  -1  -9  -1    4.00    0.44
   9  -1   1    2.56    0.24
   1   1  -9    1.55    0.29
  -9   1   1    1.58    0.24
   1   1  -9    2.29    0.33
   1  -9   1    1.46    0.30
  -1   9   1    2.28    0.29
  -1  -1  -9    1.26    0.28
   1   9  -1    1.23    0.28
   2  -9  -1  593.74   20.38
   2   9   1  599.72   20.30
   1  -2  -9  619.93   21.16
  -1   2  -9  589.17   20.25
  -9   1  -2  573.51   18.58
  -2   9  -1  568.34   19.73
  -2  -9   1  618.84   20.97
   9  -1  -2  577.54   19.44
   9   1   2  563.51   16.99
  -1   2  -9  577.28   20.07
  -1  -2  -9  607.59   21.47
  -2   9   1  573.66   19.88
   9  -1   2  591.03   19.07
   9   1  -2  572.13   18.80
  -2  -9  -1  577.15   19.51
   1   2  -9  589.62   20.40
   2   9  -1  600.73   20.50
   2  -9   1  591.84   21.03
   9  -1  -3  605.57   20.89
   1  -3  -9  632.16   22.56
  -3   9  -1  613.23   22.30
  -3  -9   1  605.71   20.92
   3  -9  -1  596.05   20.96
   3   9   1  650.63   22.61
   9   1   3  578.35   17.64
  -1   3  -9  603.17   21.11
   1  -3  -9  662.24   23.77
   1   3   9  648.79   22.62
  -9   1  -3  614.04   20.12
   3  -9   1  646.69   23.21
   3   9  -1  597.92   20.71
  -3   9   1  617.70   21.72
  -9  -1  -3  611.70   18.57
   9  -1   3  609.70   19.49
  -3  -9  -1  632.87   21.56
  -1  -3  -9  648.60   22.57
   1   3  -9  599.68   21.13
  -1  -3  -9  627.37   21.60
   9  -1   3  582.49   18.91
   9   1  -3  604.50   20.13
  -4   9  -1   68.60    1.96
   1  -4  -9   67.36    1.80
   4  -9  -1   67.68    1.92
   4   9   1   69.60    1.88
  -1   4  -9   63.46    2.25
   1   4   9   64.59    2.25
  -9   1  -4   64.47    1.46
   9  -1  -4   65.25    1.86
   1  -4  -9   70.07    1.95
  -4  -9   1   70.70    2.02
  -4  -9  -1   68.15    1.89
  -1  -4  -9   69.94    2.44
   9   1  -4   67.85    1.78
   9  -1   4   66.51    1.54
   4  -9   1   67.02    2.37
   9  -1   4   64.76    1.36
   1   4  -9   63.04    2.30
  -9  -1  -4   68.63    1.23
   4   9  -1   66.87    1.95
  -4   9   1   62.22    2.30
  -4   9   1   66.59    1.74
  -1  -4  -9   65.88    2.00
  -5  -9   1    9.30    0.59
   1  -5  -9    8.85    0.58
  -5   9  -1    8.51    0.55
  -1   5  -9    7.80    0.53
   1   5   9    8.15    0.53
   9  -1  -5    7.81    0.60
  -9   1  -5    8.08    0.35
   5   9   1    8.41    0.48
   1  -5  -9    7.99    0.48
   9   1   5    8.40    0.44
   5  -9  -1    7.54    0.56
  -5   9   1    9.19    0.44
  -1  -5  -9    7.61    0.56
   1   5  -9    7.82    0.56
   9  -1   5    8.98    0.30
  -5   9   1    7.57    0.54
  -1   5   9    8.25    0.85
   9   1  -5    8.02    0.53
   5  -9   1    7.23    0.53
   9  -1   5    7.57    0.38
  -5  -9  -1    8.65    0.35
   5   9  -1    7.93    0.37
  -1  -5  -9    8.30    0.64
   1  -6  -9 1585.35   72.95
   9   1   6 1489.90   66.09
   6  -9  -1 1525.26   70.30
   9  -1  -6 1515.62   68.78
   1  -6  -9 1483.77   67.16
  -6  -9   1 1535.66   68.14
  -6   9  -1 1504.59   64.58
  -1   6  -9 1358.30   62.03
   1   6   9 1501.78   68.14
   6   9   1 1407.50   62.55
  -6   9  -1 1495.07   69.21
  -9   1  -6 1391.38   61.41
  -1  -6  -9 1522.64   69.40
  -6   9   1 1439.43   65.69
  -9  -1  -6 1475.97   62.35
   9  -1   6 1444.18   63.36
   6   9  -1 1495.40   67.22
   9  -1   6 1423.71   61.84
  -6   9   1 1475.01   64.75
   1  -6   9 1497.07   68.53
   6  -9   1 1474.77   68.26
  -6  -9  -1 1504.79   66.63
   1   6  -9 1430.88   66.67
   9   1  -6 1440.51   64.55
  -1   6   9 1477.47   68.52
  -1   7  -9   74.03    2.28
  -7   9  -1   77.56    1.52
   9   1   7   75.41    1.77
  -7   9  -1   72.67    2.77
   7  -9  -1   76.69    2.84
   1  -7  -9   72.29    2.55
  -9   1  -7   75.37    1.93
   7   9   1   76.00    1.83
   9  -1  -7   72.33    2.00
   1   7   9   78.49    2.85
  -7  -9   1   77.72    2.11
   1   7  -9   75.97    2.90
   9  -1   7   70.36    1.55
  -1  -7  -9   76.34    2.40
   9   1  -7   72.31    2.32
  -7   9   1   74.55    1.66
  -7   9   1   83.74    2.93
  -9  -1  -7   72.17    1.62
  -7  -9  -1   79.96    1.98
   7  -9   1   80.28    2.90
   7   9  -1   76.79    1.81
  -1   7   9   78.05    2.83
   1  -7   9   76.20    2.46
  -8   9  -1    0.91    0.36
  -1   8  -9    1.23    0.63
   1   8   9    2.26    0.61
   1  -8  -9    1.05    0.32
  -9   1  -8    1.16    0.30
  -1  -8   9    1.00    0.46
   9  -1  -8    0.84    0.30
   8  -9  -1    1.05    0.38
   8   9   1    1.37    0.19
  -8  -9  -1    1.11    0.21
   9   1  -8    0.86    0.28
   1  -8   9    1.03    0.46
   8   9  -1    1.72    0.26
  -1   8   9    1.76    0.37
  -9  -1  -8    0.95    0.20
  -1  -8  -9    0.94    0.43
  -8   9   1    0.76    0.36
  -2   0  -9  130.19    3.75
   9   2   0  127.56    2.71
   0  -9  -2  131.56    3.88
   0   9   2  128.55    3.41
   2   0  -9  143.92    4.21
   0  -9   2  132.10    3.57
   9  -2   0  142.58    3.60
   0   9  -2  132.98    3.60
  -2   0  -9  123.34    3.30
  -9   2   0  130.55    3.09
  -1  -9   2  131.04    3.96
  -1   9  -2  133.61    4.09
   9   2   1  122.54    2.35
   9  -2  -1  139.40    3.57
  -2   1  -9  128.51    3.26
  -9   2  -1  134.90    3.13
  -2   1  -9  119.47    3.22
   1   9   2  135.04    3.83
   1  -9  -2  127.05    3.39
   2  -1  -9  139.13    3.65
   9   2   1  129.80    2.48
  -1  -9  -2  138.56    3.87
   9  -2   1  133.28    3.35
   1   9  -2  125.85    3.41
   9   2  -1  133.90    3.00
  -2  -1  -9  135.76    3.52
   1  -9   2  123.65    3.38
  -1   9   2  124.46    3.80
  -9   2   1  132.91    3.41
   2   9   2  183.28    5.24
  -2  -9   2  193.91    5.26
   2  -2  -9  196.91    5.41
  -2   2  -9  182.75    4.83
  -2   9  -2  178.81    5.12
   2  -9  -2  187.20    5.18
  -2   2  -9  175.58    4.89
   2  -2  -9  189.28    5.69
   9  -2  -2  191.97    5.23
  -9   2  -2  189.30    4.88
   9  -2   2  194.23    5.00
   2   9  -2  196.07    5.78
  -9   2   2  182.63    5.01
  -2   9   2  175.00    5.42
   2  -9   2  189.53    5.81
   9   2  -2  190.72    4.74
  -2  -9  -2  181.30    5.20
   2   2  -9  179.92    5.66
  -2  -2  -9  199.08    5.88
  -2   3  -9  415.24   13.69
   2  -3  -9  424.10   13.98
   2  -3  -9  441.13   14.56
   3   9   2  408.14   12.97
   9  -2  -3  408.74   12.53
  -3  -9   2  419.53   13.15
  -9   2  -3  396.97   12.06
   3  -9  -2  394.38   12.63
  -2   3  -9  405.39   12.93
  -3   9  -2  393.23   12.76
   2   3   9  432.26   13.65
  -2  -3  -9  425.91   14.16
   3  -9   2  422.53   14.17
   9   2  -3  446.83   13.38
   3   9  -2  411.70   13.52
   2   3  -9  419.86   13.54
   9  -2   3  412.11   12.19
  -3   9   2  425.36   13.47
  -3   9   2  410.48   13.16
  -2  -3  -9  403.79   12.95
  -3  -9  -2  414.21   13.05
   9  -2   3  368.87   10.11
   2  -4  -9  204.70    5.80
  -9   2  -4  197.00    5.17
  -4   9  -2  190.98    6.13
   2  -4  -9  197.56    6.04
   2   4   9  186.12    5.92
  -2   4  -9  189.43    5.37
  -4  -9   2  195.79    5.76
   9  -2  -4  183.48    5.37
   4   9   2  203.58    5.54
   4  -9  -2  187.39    5.40
   9   2  -4  191.80    5.23
   4  -9   2  189.14    6.08
  -2  -4  -9  200.87    5.70
  -4   9   2  204.44    5.61
  -4  -9  -2  198.20    5.16
  -2  -4  -9  210.83    5.98
   4   9  -2  199.43    5.80
  -4   9   2  187.54    5.43
   9  -2   4  212.74    4.80
   9  -2   4  194.37    5.14
   2   4  -9  199.90    5.79
   2  -5  -9  379.73   12.78
   2   5   9  405.66   13.60
  -9   2  -5  399.17   11.84
   5  -9  -2  388.21   13.19
   5   9   2  384.54   11.87
   9   2   5  409.22   12.61
  -5   9  -2  385.90   13.20
  -5  -9   2  398.60   12.43
   9  -2  -5  392.29   12.23
  -2   5  -9  393.17   12.57
   2  -5  -9  431.51   14.32
  -5  -9  -2  420.21   12.77
  -5   9   2  418.52   12.81
   9  -2   5  400.23   12.20
   9  -2   5  381.97   10.71
  -5   9   2  405.30   13.71
   5  -9   2  379.33   13.02
   9   2  -5  412.16   12.89
   5   9  -2  381.34   11.89
   2   5  -9  393.02   13.45
  -2  -5  -9  397.68   12.74
   9  -2  -6   20.21    1.02
   6   9   2   20.12    0.65
  -6   9  -2   22.76    1.29
   2  -6  -9   22.32    0.91
   2   6   9   20.22    1.25
  -6  -9   2   21.65    0.93
   2  -6  -9   20.05    0.86
  -6   9  -2   21.31    0.51
  -9   2  -6   20.25    0.74
  -2   6  -9   19.52    0.85
   6  -9  -2   20.40    1.28
   9   2   6   20.99    0.76
  -9  -2  -6   19.18    0.36
  -9  -2  -6   22.10    0.37
  -6   9   2   21.62    0.70
  -2   6   9   26.70    0.94
   2  -6   9   20.60    1.43
   9   2  -6   19.04    0.87
   2   6  -9   21.66    0.92
   9  -2   6   22.43    0.81
  -2  -6  -9   19.91    0.67
   6   9  -2   20.04    0.87
  -6   9   2   19.07    1.25
   6  -9   2   20.19    0.87
  -6  -9  -2   21.25    0.71
   9  -2  -7  176.98    5.07
  -7  -9   2  191.67    5.09
  -9   2  -7  180.29    5.08
  -2   7  -9  182.66    6.07
   7  -9  -2  175.33    5.90
   7   9   2  189.03    4.59
  -7   9  -2  185.36    5.50
   2  -7  -9  185.59    5.93
  -7   9  -2  185.86    4.08
   2   7   9  179.71    5.35
   9   2   7  196.48    5.45
   7   9  -2  180.25    5.13
   2  -7   9  176.02    5.51
  -9  -2  -7  185.08    4.31
  -2  -7  -9  185.60    5.11
  -7  -9  -2  187.98    4.81
  -7   9   2  175.24    5.25
  -2   7   9  185.00    5.47
   9  -2   7  176.42    4.68
   7  -9   2  184.76    5.45
   9   2  -7  183.77    5.50
   2   7  -9  178.10    5.38
  -7   9   2  180.63    4.63
   8  -9  -2 1182.46   52.12
   8   9   2 1227.57   50.05
   9  -2  -8 1192.42   52.01
  -8   9  -2 1282.48   56.32
   9   2   8 1275.66   55.36
  -9   2  -8 1265.82   53.73
  -2   8  -9 1232.66   54.36
   9  -2  -8 1336.56   59.20
   2   8   9 1258.19   55.16
   2  -8  -9 1238.01   54.29
  -2  -8  -9 1286.06   56.53
  -8   9   2 1250.99   55.07
   8  -9   2 1271.11   55.54
  -9  -2  -8 1224.62   50.09
  -2   8   9 1310.61   58.86
   8   9  -2 1238.93   53.34
   2  -8   9 1254.32   57.55
  -8  -9  -2 1176.13   48.52
   9   2  -8 1255.32   54.53
   2   8  -9 1277.20   56.23
  -9   3   0 1148.11   46.13
   0   9  -3 1060.72   44.50
   0  -9   3 1025.50   42.01
   0  -9  -3 1046.06   43.25
   9   3   0 1120.94   41.47
   9  -3   0 1053.57   42.57
  -3   0  -9 1053.76   42.53
  -3   0  -9 1107.68   44.57
   9   3   0 1050.67   39.03
   3   0  -9 1153.02   46.67
   0   9   3 1054.76   43.70
  -1   9  -3  378.32   11.75
   9  -3  -1  369.39   10.81
  -9   3  -1  355.28   10.67
  -3   1  -9  370.35   11.15
   3  -1  -9  386.27   12.32
   1  -9  -3  358.53   11.52
   1   9   3  359.75   11.37
  -3   1  -9  343.75   10.76
  -1  -9   3  353.77   10.91
  -1  -9  -3  375.28   11.67
  -9   3   1  373.09   10.96
  -3  -1  -9  362.44   10.83
   9  -3   1  357.23   10.80
   1  -9   3  349.62   10.89
   9   3  -1  343.91    9.40
  -1   9   3  353.61   10.86
  -1   9   3  364.81   10.99
   9  -3   1  317.78    7.89
   1   9  -3  345.14   10.73
  -3  -1  -9  354.67   10.75
   9   3  -1  339.22    9.57
   2   9   3   42.96    1.38
  -2   9  -3   42.81    1.30
   3  -2  -9   45.51    1.31
   3  -2  -9   43.01    1.24
   9  -3  -2   39.25    1.02
   2  -9  -3   42.81    1.65
  -3   2  -9   41.91    1.06
  -2  -9   3   42.11    1.61
  -9   3  -2   42.31    0.99
   3   2   9   43.18    1.54
  -3   2  -9   41.06    1.49
  -2  -9  -3   43.83    1.39
   3   2  -9   39.29    1.29
  -2   9   3   42.23    1.40
   9   3  -2   42.76    0.89
   9  -3   2   43.42    1.26
   2  -9   3   43.30    1.75
  -3  -2  -9   44.51    1.61
  -2   9   3   43.35    1.64
   9   3  -2   40.96    0.95
  -9   3   2   42.06    1.31
   3   9   3   99.44    2.45
  -9   3  -3   97.01    2.32
   9  -3  -3   96.32    2.45
   3  -3  -9  107.94    3.38
  -3  -9   3  100.39    3.14
   3  -3  -9  101.63    2.77
  -3   3  -9   98.96    2.41
  -3   9  -3  105.27    3.44
   3  -9  -3  103.96    2.83
   3   3   9  107.47    3.24
  -3   3  -9   98.50    2.63
  -3  -3  -9  102.50    3.25
   9   3  -3  105.26    2.52
   3   9  -3   95.10    2.99
  -3  -9  -3   98.01    2.39
  -3   9   3  100.41    2.78
  -9   3   3  100.16    2.81
   3  -9   3  100.98    2.79
  -3   9   3  104.35    2.90
   9  -3   3  106.57    2.76
  -3  -3  -9  100.00    2.45
   3   3  -9   99.13    2.83
   9   3  -3  110.90    2.70
  -9   3  -4  585.98   19.96
   3  -4  -9  597.27   21.51
   3  -4  -9  609.31   21.18
  -3   4  -9  569.71   19.61
   4  -9  -3  590.82   21.44
   9  -3  -4  573.84   20.19
  -3   4  -9  551.43   19.26
  -4   9  -3  582.94   21.43
   4   9   3  590.03   19.70
   9  -3  -4  578.78   19.16
  -4  -9   3  589.81   21.18
   3   4   9  585.61   20.38
  -3  -4  -9  581.85   20.13
   9  -3   4  612.49   20.76
  -4   9   3  562.78   19.85
   9   3  -4  575.88   19.25
  -4   9   3  611.66   21.20
   9   3  -4  573.99   19.48
  -4  -9  -3  607.42   20.60
   4   9  -3  595.01   20.50
   3   4  -9  589.95   21.59
   4  -9   3  536.63   18.94
   3  -5  -9  511.64   17.46
  -5   9  -3  502.02   18.16
   9  -3  -5  510.11   17.08
   3   5   9  527.89   18.63
   3  -5  -9  524.99   17.83
  -9   3  -5  525.14   17.47
  -3   5  -9  498.50   16.98
   9  -3  -5  503.86   16.88
   5  -9  -3  509.29   18.28
  -5  -9   3  531.57   18.37
   5   9   3  504.96   16.54
   9  -3   5  521.21   17.32
   5   9  -3  509.83   17.08
  -3  -5  -9  549.90   18.41
   5  -9   3  510.65   18.24
   3   5  -9  525.56   18.07
   9   3  -5  508.50   16.72
   3  -5   9  495.44   18.05
  -5  -9  -3  543.66   17.72
  -5   9   3  535.50   17.41
   9   3  -5  511.39   16.68
  -5   9   3  516.21   17.74
   6   9   3  190.92    5.00
   3  -6  -9  207.73    6.53
   9  -3  -6  179.70    5.12
   9  -3  -6  200.36    5.67
   6  -9  -3  189.71    6.27
   3  -6  -9  192.23    6.19
   9   3   6  195.65    5.22
  -3   6  -9  182.20    5.39
   3   6   9  189.71    5.55
  -6   9  -3  186.47    6.18
  -6  -9   3  199.38    5.51
  -9   3  -6  197.45    5.53
  -6   9   3  198.90    5.14
   6   9  -3  193.48    5.68
  -6  -9  -3  205.29    5.33
  -6   9   3  189.11    5.61
   9   3  -6  185.18    5.18
   6  -9   3  191.92    5.63
   3  -6   9  185.05    6.39
   9  -3   6  189.76    5.42
   3   6  -9  187.33    6.21
  -3  -6  -9  188.72    5.47
   7  -9  -3  750.70   29.30
  -7   9  -3  750.48   24.41
   9   3   7  735.58   26.90
   9  -3  -7  741.85   28.06
   7   9   3  813.24   28.10
   3   7   9  701.30   27.57
  -7   9  -3  725.96   28.58
   9  -3  -7  704.36   26.39
  -7  -9   3  705.96   25.92
   3  -7  -9  736.42   27.78
  -3   7  -9  730.86   28.67
   3  -7  -9  781.16   30.17
  -9   3  -7  764.62   28.40
   7  -9   3  719.59   28.26
  -3  -7  -9  711.07   26.17
   3   7  -9  737.17   27.95
  -9  -3  -7  691.09   22.62
  -3   7   9  788.34   30.60
   7   9  -3  745.52   27.22
  -9  -3  -7  678.36   22.12
   3  -7   9  759.11   30.19
  -7  -9  -3  741.05   25.95
   9  -3   7  695.43   25.52
  -7   9   3  736.41   28.00
   9   3  -7  735.05   27.37
   9  -3  -8  213.74    7.16
   3  -8  -9  216.16    6.71
   9  -3  -8  231.89    7.24
  -9   3  -8  219.53    6.70
  -8   9  -3  220.94    7.61
   8  -9  -3  231.49    7.09
   3   8   9  226.19    7.85
   8   9   3  216.21    5.41
  -3   8  -9  229.26    7.15
   9   3   8  220.72    6.82
   3  -8   9  220.48    7.10
  -9  -3  -8  233.85    5.92
  -3  -8  -9  220.68    6.74
  -8   9   3  217.71    7.55
  -8  -9  -3  231.82    5.84
  -3   8   9  227.25    6.96
   8   9  -3  230.41    6.45
   3   8  -9  215.81    6.78
   9  -3   8  218.49    6.80
  -9  -3  -8  230.72    5.57
   9   3  -8  222.02    7.32
   8  -9   3  212.43    6.66
  -4   0  -9   99.21    2.81
   9  -4   0   93.63    2.35
  -4   0  -9   98.48    2.84
   9  -4   0   94.02    1.64
   0   9   4   95.67    2.54
   0  -9   4   97.02    3.22
  -9   4   0   95.92    2.40
   9   4   0  108.39    2.08
   0   9  -4   97.88    3.25
   0   9   4   97.58    2.60
   0  -9  -4   96.97    2.53
   9   4   0  111.61    2.05
   1   9   4 1464.80   66.81
   9  -4  -1 1498.17   66.71
   4  -1  -9 1620.05   72.73
  -1  -9   4 1494.31   67.58
  -4   1  -9 1432.83   64.95
   9  -4  -1 1489.94   61.99
  -1   9  -4 1440.89   65.55
  -4   1  -9 1492.44   67.28
  -9   4  -1 1460.32   65.91
   4  -1  -9 1462.94   65.91
   1  -9  -4 1508.59   67.72
  -1   9   4 1528.65   69.53
   1   9  -4 1561.16   70.64
   1  -9   4 1455.05   66.03
  -9   4   1 1450.18   64.95
  -4  -1  -9 1456.43   65.55
   9   4  -1 1519.52   64.11
  -4  -1  -9 1543.05   70.10
  -1  -9  -4 1594.66   71.85
   9   4  -1 1478.07   62.76
  -1   9   4 1464.07   67.22
   9  -4   1 1496.68   66.42
   4  -2  -9  219.13    6.69
   2  -9  -4  194.55    5.55
  -4   2  -9  206.59    5.64
  -2   9  -4  198.24    5.82
   9  -4  -2  198.14    4.82
   9  -4  -2  206.64    6.02
   4   2   9  204.38    6.08
   4  -2  -9  191.20    5.99
  -2  -9   4  205.30    5.89
  -9   4  -2  206.18    5.80
  -4   2  -9  195.33    5.22
   2   9   4  206.57    5.61
  -2   9   4  209.81    6.20
   4   2  -9  209.18    6.07
   2   9  -4  198.05    6.25
   9   4  -2  205.00    5.23
   9  -4   2  214.93    6.01
  -9   4   2  199.28    5.47
  -2  -9  -4  212.86    6.02
   2  -9   4  193.71    5.66
   9   4  -2  216.13    5.35
  -4  -2  -9  210.68    6.36
  -4  -2  -9  205.17    5.79
  -2   9   4  208.67    6.46
  -3  -9   4    3.26    0.38
  -9   4  -3    3.36    0.25
   9  -4  -3    3.48    0.24
   3   9   4    3.22    0.40
   4   3   9    3.04    0.33
   3  -9  -4    2.68    0.38
   4  -3  -9    2.88    0.37
   4  -3  -9    3.33    0.38
  -4   3  -9    2.39    0.37
   9  -4  -3    2.75    0.31
  -3   9  -4    3.20    0.64
  -4  -3  -9    2.69    0.22
  -3   9   4    3.43    0.48
   3  -9   4    2.57    0.40
   9   4  -3    2.91    0.31
  -9   4   3    2.73    0.47
   3   9  -4    2.84    0.54
  -3   9   4    2.76    0.38
  -3  -9  -4    2.62    0.39
  -4   4  -9 1176.70   48.14
  -4  -9   4 1161.72   48.42
  -4   4  -9 1100.01   45.70
   9  -4  -4 1144.15   46.35
   4  -4  -9 1196.59   50.53
  -9   4  -4 1138.63   47.29
   4  -9  -4 1087.97   46.59
   4  -4  -9 1113.20   47.59
  -4   9  -4 1150.74   49.33
   9  -4  -4 1078.92   45.60
   4   4   9 1134.35   47.98
   4   9   4 1127.08   45.74
   4  -9   4 1054.48   44.36
   9   4  -4 1089.60   44.23
  -4   9   4 1095.87   47.19
   4   4  -9 1082.18   46.68
  -4  -9  -4 1135.20   46.45
  -4   9   4 1196.63   49.94
   9  -4   4 1091.74   45.46
   4   9  -4 1133.30   48.00
  -4  -4  -9 1123.72   46.21
  -9   4   4 1106.08   46.64
   5  -9  -4   30.41    1.56
   4  -5  -9   35.49    1.18
   4  -5  -9   33.72    1.54
  -5   9  -4   30.41    1.61
   9  -4  -5   32.40    1.00
   5   9   4   32.06    0.94
   9  -4  -5   29.33    0.99
  -4   5  -9   29.27    0.98
   4   5   9   30.53    1.05
  -4   5  -9   31.13    1.04
  -5  -9   4   30.67    1.03
  -9   4  -5   30.81    0.87
  -5   9   4   29.73    1.56
   5  -9   4   32.82    1.20
   5   9  -4   31.02    1.30
   4  -5   9   34.00    1.20
  -4  -5  -9   30.38    0.81
  -5   9   4   34.34    1.16
   9   4  -5   30.73    0.88
  -5  -9  -4   32.97    0.98
   4   5  -9   31.32    1.15
   9  -4   5   32.02    0.90
   6  -9  -4   13.85    0.79
   4  -6  -9   14.42    1.17
  -6   9  -4   14.72    1.18
   9  -4  -6   14.60    0.73
  -4   6  -9   13.43    1.09
   9  -4  -6   13.69    0.99
  -6  -9   4   14.45    0.95
   6   9   4   16.39    0.53
   9   4   6   14.94    0.60
   4  -6  -9   15.10    0.74
   4   6   9   13.60    1.13
  -6   9  -4   14.79    1.18
  -9   4  -6   16.32    0.80
  -6   9   4   16.13    0.81
  -4  -6  -9   14.70    0.70
   6   9  -4   14.62    0.62
   4   6  -9   13.99    1.19
   6  -9   4   19.32    1.25
   9   4  -6   13.95    0.87
   9  -4   6   14.17    0.84
   4  -6   9   14.78    0.84
  -6   9   4   14.99    0.70
  -6  -9  -4   17.23    0.59
  -4   7  -9  197.02    6.01
   9   4   7  201.85    5.67
  -7   9  -4  187.54    6.52
   4  -7  -9  205.11    6.71
   7  -9  -4  189.14    5.78
   9  -4  -7  202.93    5.65
   4  -7  -9  202.00    6.79
   7   9   4  208.77    5.19
  -9   4  -7  195.29    5.97
   9  -4  -7  194.73    5.74
   4   7   9  193.47    5.88
   4  -7   9  194.86    7.05
   7   9  -4  190.18    5.87
  -7   9   4  189.05    5.81
  -4  -7  -9  202.39    5.80
   9   4  -7  204.21    6.41
   7  -9   4  184.58    5.70
  -7  -9  -4  206.97    5.28
   4   7  -9  193.17    5.92
   9  -4   7  200.33    5.69
  -9   4  -8  281.89    9.13
  -8   9  -4  274.56    8.90
  -4   8  -9  287.25    9.24
   4   8   9  278.02    9.01
   9  -4  -8  281.89    9.56
   9   4   8  266.02    8.84
   8  -9  -4  271.30    9.65
   9  -4  -8  286.94    9.26
   4  -8  -9  277.12    9.79
  -8  -9  -4  293.00    7.70
   4  -8   9  269.74    9.04
  -8   9   4  290.23   10.08
   9  -4   8  296.35    9.57
  -4  -8  -9  285.74    8.82
   8   9  -4  299.71    9.43
   9   4  -8  287.59    9.66
   4   8  -9  286.38    9.16
   8  -9   4  269.21    9.62
  -9  -4  -8  303.29    7.70
  -9  -4  -8  288.65    7.30
   0   9  -5   24.23    0.94
  -9   5   0   22.29    0.72
   0  -9  -5   23.18    0.79
  -5   0  -9   29.68    1.06
   9   5   0   27.19    0.50
   0   9   5   24.81    1.20
   9  -5   0   23.03    0.75
   0  -9   5   22.39    0.93
  -5   0  -9   22.87    0.90
   9   5   0   22.18    0.38
   0   9   5   23.96    1.09
   9  -5  -1  235.41    6.62
   5  -1  -9  246.77    7.67
   1  -9  -5  225.35    6.49
  -1  -9   5  219.45    6.57
   5  -1  -9  231.45    7.19
  -1   9  -5  244.94    7.81
   1   9   5  233.80    7.31
  -5   1  -9  227.32    6.28
  -9   5  -1  223.33    6.28
   1   9   5  231.37    6.55
   5   1   9  228.19    6.76
  -5   1  -9  234.47    6.76
  -1   9   5  222.39    6.96
   9   5  -1  259.75    6.39
  -1  -9  -5  224.17    6.30
   1   9  -5  228.95    6.75
  -1   9   5  224.99    6.47
   1  -9   5  230.62    7.51
  -9   5   1  226.44    6.42
  -5  -1  -9  236.54    6.73
  -5  -1  -9  243.80    6.83
   9  -5   1  220.08    6.18
   5  -2  -9   37.35    1.16
   9  -5  -2   38.22    0.78
   2  -9  -5   39.96    1.61
   2   9   5   37.19    1.01
  -5   2  -9   35.88    1.02
   5  -2  -9   41.76    1.23
   2   9   5   36.14    1.63
  -2   9  -5   38.73    1.29
  -5   2  -9   37.14    1.19
   5   2   9   39.38    1.09
  -9   5  -2   36.83    1.02
  -2  -9   5   38.72    1.75
   9  -5  -2   36.58    1.08
   2  -9   5   35.45    1.26
   9   5  -2   39.50    0.95
   2   9  -5   40.43    1.25
  -2  -9  -5   38.11    1.30
  -5  -2  -9   37.24    1.16
  -2   9   5   39.30    1.48
   9  -5   2   38.13    1.32
  -9   5   2   35.94    1.37
  -2   9   5   38.69    1.58
  -5   3  -9  658.23   23.64
   5   3   9  682.98   25.20
   3  -9  -5  692.84   25.16
   9  -5  -3  678.01   24.97
  -3  -9   5  712.79   26.00
  -5   3  -9  639.07   22.40
  -9   5  -3  654.36   24.04
   3   9   5  699.94   24.72
   9  -5  -3  667.57   22.63
   5  -3  -9  676.66   25.23
  -3   9  -5  690.42   25.32
   5  -3  -9  707.21   25.51
  -3   9   5  698.78   25.46
   3   9  -5  678.52   25.56
  -5  -3  -9  666.90   23.16
  -3   9   5  685.63   24.70
  -9   5   3  687.41   24.72
   9   5  -3  650.53   22.73
  -5  -3  -9  673.70   23.92
   5   3  -9  677.66   25.78
   9  -5   3  648.32   23.83
   3  -9   5  679.65   25.73
  -3  -9  -5  666.50   24.03
  -5   4  -9   12.07    0.41
  -5   4  -9   12.44    0.59
  -9   5  -4   13.13    0.78
   5  -4  -9   11.95    0.65
   9  -5  -4   11.87    0.58
  -4   9  -5   14.76    0.78
   4   9   5   12.02    0.60
   5  -4  -9   13.36    0.96
   5   4   9   13.21    0.62
   9  -5  -4   12.78    0.50
   4  -9  -5   12.85    0.71
  -4  -9   5   12.01    0.68
   9   5  -4   12.93    0.44
   4  -9   5   14.45    1.10
   5  -4   9   13.25    1.02
  -5  -4  -9   12.20    0.55
  -4  -9  -5   12.01    0.61
  -9   5   4   13.11    0.60
   4   9  -5   13.19    0.94
  -4   9   5   12.60    0.70
  -4   9   5   13.01    0.55
   9  -5   4   12.90    0.80
   5   4  -9   12.81    1.09
  -5   5  -9  178.21    4.85
   5  -9  -5  183.46    5.39
   9  -5  -5  170.87    5.44
  -9   5  -5  177.01    4.86
   5   9   5  177.58    4.48
   9  -5  -5  170.55    4.62
  -5   5  -9  171.48    5.47
   5   5   9  175.08    5.02
  -5   9  -5  177.74    5.29
   5  -5  -9  186.15    5.28
  -5  -9   5  179.45    5.18
   5  -5  -9  173.86    5.15
   5   9  -5  172.28    4.91
   9   5  -5  177.70    5.12
  -5  -5  -9  169.41    4.35
   9  -5   5  176.50    5.29
  -5   9   5  168.85    5.05
   5   5  -9  177.68    5.25
  -5   9   5  180.44    4.91
   5  -9   5  174.00    5.83
  -9   5   5  170.83    4.91
   5  -5   9  168.43    5.70
  -5  -9  -5  172.64    4.40
   9  -5  -6 1289.35   57.88
   5  -6  -9 1329.45   58.97
   6   9   5 1316.68   55.80
  -5   6  -9 1333.59   59.02
   5   6   9 1302.70   58.77
  -6   9  -5 1318.74   58.79
   9   5   6 1360.74   60.59
  -5   6  -9 1310.39   56.96
   6  -9  -5 1305.28   59.26
  -9   5  -6 1272.93   56.11
   5  -6  -9 1394.06   62.35
   9  -5  -6 1265.22   55.44
   9  -5   6 1298.52   56.95
   5   6  -9 1337.82   60.39
   6   9  -5 1320.29   58.11
  -5  -6  -9 1229.18   53.51
   5  -6   9 1272.41   58.45
  -6   9   5 1281.01   56.06
   6  -9   5 1250.21   55.60
  -6  -9  -5 1404.06   59.31
   9   5  -6 1239.44   55.29
  -6   9   5 1353.32   61.30
  -9   5  -7   84.22    2.33
   5  -7  -9   81.59    2.57
   9  -5  -7   81.94    2.52
  -7   9  -5   85.23    2.68
   5  -7  -9   83.97    3.04
  -5   7  -9   84.25    2.59
  -5   7  -9   79.65    1.92
   5   7   9   80.74    2.56
   9   5   7   82.52    2.84
   7  -9  -5   79.34    3.24
   9  -5  -7   77.44    2.99
  -5  -7  -9   80.45    1.98
   5  -7   9   83.39    3.43
  -7  -9  -5   85.30    2.02
   5   7  -9   81.08    2.55
   9   5  -7   79.89    2.81
   7  -9   5   82.05    3.25
  -7   9   5   83.68    2.65
   9  -5   7   83.43    2.38
   7   9  -5   84.22    2.75
   5   8   9  135.10    4.21
  -9   5  -8  138.20    4.40
   9   5   8  132.33    3.83
   8  -9  -5  126.51    3.97
  -8   9  -5  135.83    4.86
  -5   8  -9  135.14    4.20
   5  -8  -9  133.84    4.20
   9  -5  -8  125.85    3.87
   9  -5  -8  132.71    4.12
   5  -8   9  136.10    5.31
   8  -9   5  130.72    4.07
   9   5  -8  133.32    4.52
   5   8  -9  129.08    4.02
  -8  -9  -5  129.90    2.98
  -9  -5  -8  129.72    2.64
   8   9  -5  135.87    4.22
  -5  -8  -9  140.24    3.89
  -9  -5  -8  134.80    2.72
   9  -5   8  133.77    3.90
  -8   9   5  131.24    4.11
   0   9  -6 1009.92   41.49
  -6   0  -9  908.12   35.91
   9   6   0  957.11   34.49
  -9   6   0  981.92   39.60
   0   9   6  975.36   38.75
   6   0  -9  939.36   37.40
   0   9   6  957.74   38.19
   9  -6   0  959.25   38.79
   0  -9   6  981.94   40.61
   0  -9  -6  938.54   37.34
  -9   6  -1  396.31   12.54
   9  -6  -1  379.34   12.69
  -1  -9   6  409.12   14.19
   6  -1  -9  386.02   13.01
   6   1   9  395.64   12.71
  -6   1  -9  397.64   12.68
  -6   1  -9  389.21   11.98
  -1   9  -6  406.62   13.27
   1   9   6  403.73   13.17
   1   9   6  399.64   12.82
   1  -9  -6  402.18   12.82
   1   9  -6  398.30   13.04
  -1  -9  -6  404.49   12.70
  -9   6   1  382.82   12.25
  -1   9   6  380.34   12.90
   9  -6   1  400.60   13.17
   9   6  -1  411.12   11.81
   1  -9   6  378.48   12.51
  -6  -1  -9  397.49   12.33
  -1   9   6  404.55   12.98
   6  -2  -9 1126.98   48.76
   9  -6  -2 1135.20   47.95
   6  -2  -9 1238.40   52.34
  -6   2  -9 1171.42   48.21
  -9   6  -2 1209.03   51.74
  -2   9  -6 1192.71   50.81
   2  -9  -6 1163.40   49.25
  -2  -9   6 1216.48   53.10
  -6   2  -9 1110.02   46.52
   2   9   6 1235.61   52.20
   6   2   9 1139.77   47.85
   2   9   6 1174.51   49.91
   9  -6   2 1159.74   48.81
  -2  -9  -6 1143.35   48.74
  -6  -2  -9 1186.64   49.11
   9   6  -2 1168.51   47.45
   2   9  -6 1258.38   54.50
   2  -9   6 1105.21   47.33
  -9   6   2 1133.64   48.93
  -2   9   6 1164.20   50.47
  -2   9   6 1187.78   51.33
   6  -3  -9    4.28    0.51
   9  -6  -3    1.16    0.18
   3   9   6    2.40    0.57
   6   3   9    1.74    0.27
   3  -9  -6    1.52    0.55
  -3   9  -6    1.49    0.59
   9  -6  -3    1.21    0.49
  -6   3  -9    1.25    0.41
   6  -3  -9    0.96    0.32
  -9   6  -3    1.14    0.26
  -3  -9   6    1.05    0.36
   3   9   6    0.99    0.22
   9  -6   3    1.24    0.45
  -6  -3  -9    1.73    0.24
   9   6  -3    2.09    0.26
   3   9  -6    1.02    0.53
  -9   6   3    1.19    0.30
  -3   9   6    1.04    0.53
  -6  -3  -9    1.15    0.28
   6   3  -9    1.25    0.37
   3  -9   6    1.02    0.38
   6   4   9   83.35    2.31
  -4  -9   6   84.59    3.12
  -6   4  -9   83.33    1.94
  -9   6  -4   88.95    2.78
   4   9   6   81.34    2.46
   6  -4  -9   88.76    2.91
   9  -6  -4   80.90    1.81
   4  -9  -6   85.58    3.07
  -6   4  -9   84.54    2.30
   4   9   6   84.88    2.30
   9  -6  -4   84.84    2.84
   6  -4  -9   79.74    2.34
  -4   9  -6   84.21    3.15
   6   4  -9   82.49    3.00
  -4  -9  -6   80.90    2.25
  -6  -4  -9   83.31    2.16
   9  -6   4   78.85    2.20
  -4   9   6   87.78    2.79
   4   9  -6   84.41    2.91
   4  -9   6   82.41    2.54
   9   6  -4   80.71    2.25
   6  -4   9   78.82    2.31
  -4   9   6   84.47    3.01
  -6  -4  -9   84.86    2.10
  -9   6   4   83.96    2.37
   6   5   9  694.92   25.84
  -5   9  -6  743.03   29.04
  -9   6  -5  712.70   27.13
   6  -5  -9  735.74   27.24
   5   9   6  732.98   26.28
  -6   5  -9  748.29   28.62
   9  -6  -5  680.59   25.40
  -6   5  -9  665.95   23.51
   5  -9  -6  714.50   26.92
   6  -5  -9  701.79   26.30
   9  -6  -5  663.38   23.54
   5   9   6  713.34   26.76
  -5  -9   6  736.02   27.65
   9   6  -5  695.01   25.76
  -9   6   5  723.19   26.96
   5  -9   6  702.42   26.54
   6  -5   9  727.62   28.24
  -5   9   6  740.15   27.25
  -5   9   6  718.18   27.06
   5   9  -6  684.94   26.49
   9  -6   5  695.59   26.59
  -6  -5  -9  688.37   24.64
  -5  -9  -6  724.32   25.94
   6   5  -9  676.24   25.58
   6  -6  -9  155.72    5.05
  -6   9  -6  154.85    5.43
   9  -6  -6  150.94    3.93
   6  -6  -9  142.14    4.34
  -9   6  -6  160.20    5.05
  -6   6  -9  153.93    3.80
   6   6   9  147.59    5.11
   9  -6  -6  142.65    4.26
  -6   6  -9  150.62    5.04
   6  -9  -6  156.86    4.76
   9  -6   6  149.56    4.84
   9   6  -6  149.49    4.14
   6   9  -6  155.09    4.43
  -6  -6  -9  156.38    4.08
  -6  -9  -6  152.63    4.00
   6  -6   9  146.77    5.33
  -9   6   6  154.76    4.53
   6  -9   6  147.48    5.36
   6   6  -9  144.16    4.38
  -6   9   6  148.57    5.35
  -9   6  -7  892.09   35.99
  -7   9  -6  991.34   35.63
   9  -6  -7  884.64   34.91
  -6   7  -9  967.16   37.62
   7  -9  -6  876.88   37.24
   6  -7  -9  933.92   38.15
   9   6   7  891.69   35.94
   9  -6  -7  878.33   35.65
  -6   7  -9  933.18   38.98
  -7   9  -6  936.34   38.17
   6   7   9  927.18   37.57
   6  -7  -9  942.38   38.79
  -7  -9  -6  925.18   34.85
  -7   9   6  904.49   37.00
  -6  -7  -9  922.32   35.60
   7  -9   6  896.28   36.60
   6  -7   9  861.67   35.63
   6   7  -9  891.35   37.44
   7   9  -6  937.35   38.57
   9   6  -7  876.05   35.17
   9  -6   7  931.89   38.49
   6  -8  -9  438.67   16.68
  -6   8  -9  536.99   17.20
   8  -9  -6  432.97   15.34
   6  -8  -9  463.09   15.75
   9  -6  -8  430.53   16.12
   6   8   9  441.87   15.56
  -9   6  -8  453.54   15.57
  -6   8  -9  473.35   17.53
   9  -6  -8  439.28   14.69
  -8   9  -6  471.89   16.52
   9   6   8  456.63   16.54
   6  -8   9  458.74   16.33
   8   9  -6  440.54   15.76
  -6  -8  -9  439.37   13.90
   6   8  -9  446.07   16.62
   9  -6   8  470.91   16.20
   8  -9   6  445.77   16.80
   9   6  -8  449.60   15.38
  -8  -9  -6  464.43   13.83
  -9  -6  -8  424.79   11.81
  -8   9   6  461.58   16.24
  -9   7   0  656.67   24.17
  -7   0  -9  700.81   24.95
   0  -9  -7  715.27   26.51
   7   0  -9  660.14   24.17
   0   9  -7  704.91   27.17
   0   9   7  664.75   24.54
   0  -9   7  683.22   26.73
   9   7   0  669.10   22.09
   9  -7   0  640.79   23.54
   0   9   7  688.54   25.81
   7  -1  -9  248.80    7.46
  -1  -9   7  254.87    8.84
   1   9   7  248.66    7.61
   9   7   1  268.05    6.23
   1   9   7  248.21    7.78
   9  -7  -1  238.78    7.18
  -9   7  -1  242.07    7.86
  -1   9  -7  261.38    8.06
   7   1   9  246.04    7.40
  -7   1  -9  268.26    7.80
   1  -9  -7  250.58    7.49
  -1   9   7  255.30    7.66
  -1   9   7  251.94    7.63
   9  -7   1  247.47    8.02
  -7  -1  -9  253.11    7.17
   9   7  -1  253.41    6.71
   1   9  -7  252.11    7.84
  -9   7   1  258.70    7.72
  -1  -9  -7  243.02    7.62
   1  -9   7  261.54    8.20
   2  -9  -7  420.52   14.61
  -7   2  -9  406.95   12.99
   7   2   9  425.46   13.63
  -2  -9   7  414.11   15.15
   2   9   7  410.39   13.73
   2   9   7  435.50   14.48
   9  -7  -2  432.36   14.19
   7  -2  -9  455.60   14.89
  -2   9  -7  438.21   14.68
   7  -2  -9  424.91   14.70
  -9   7  -2  434.74   14.29
   2   9  -7  434.41   14.51
  -2  -9  -7  442.24   14.66
   9   7  -2  446.23   13.78
  -2   9   7  423.29   14.09
  -2   9   7  433.29   15.01
   2  -9   7  423.73   15.26
  -7  -2  -9  421.89   12.83
  -9   7   2  420.01   14.60
   9  -7   2  403.78   14.04
  -3   9  -7   17.03    1.26
  -3  -9   7   14.44    1.29
  -9   7  -3   13.72    0.65
  -7   3  -9   13.50    0.58
   9  -7  -3   12.79    1.05
  -7   3  -9   15.24    0.63
   7  -3  -9   15.72    1.04
   7   3   9   14.50    0.91
   7  -3  -9   13.54    1.09
   3   9   7   16.93    0.78
   3   9   7   15.65    1.24
  -7  -3  -9   14.67    0.51
   9   7  -3   17.92    0.65
   7   3  -9   14.28    1.15
   3  -9   7   13.21    0.84
  -7  -3  -9   13.37    0.54
  -9   7   3   14.86    1.05
  -3   9   7   15.49    0.73
   3   9  -7   18.59    1.17
   9  -7   3   12.67    1.02
  -3  -9  -7   14.57    0.56
  -3   9   7   13.35    0.73
   7  -4  -9  179.15    5.98
  -4  -9   7  185.44    5.73
  -7   4  -9  180.94    5.71
  -7   4  -9  187.22    5.01
   4  -9  -7  184.66    6.28
   9  -7  -4  184.17    5.46
   4   9   7  186.35    6.43
  -4   9  -7  179.09    6.34
   7   4   9  180.48    5.18
  -9   7  -4  190.05    5.53
   7  -4  -9  189.80    6.03
   9  -7   4  173.21    5.75
  -7  -4  -9  190.06    4.96
   7   4  -9  175.91    5.34
   4   9  -7  187.44    6.19
  -9   7   4  184.71    6.11
  -7  -4  -9  189.81    4.90
   4  -9   7  177.32    5.57
  -4   9   7  182.40    5.51
   7  -4   9  190.43    6.10
  -4  -9  -7  184.72    4.94
  -4   9   7  189.58    5.53
   9   7  -4  188.94    5.34
   9  -7  -5  112.41    4.08
   7  -5  -9  124.53    3.51
   9  -7  -5  113.67    3.06
   7   5   9  123.62    3.52
   7  -5  -9  114.95    3.53
   5   9   7  117.07    4.39
   5  -9  -7  119.65    3.72
  -7   5  -9  115.63    3.90
  -7   5  -9  118.75    2.80
  -9   7  -5  119.98    3.45
  -5   9  -7  117.53    4.41
   9   7  -5  114.78    3.08
  -7  -5  -9  120.13    2.78
   7   5  -9  115.90    4.24
   9  -7   5  115.80    3.97
   7  -5   9  126.55    3.70
  -5   9   7  122.30    3.74
   5  -9   7  116.25    4.52
  -5   9   7  127.71    3.56
  -9   7   5  119.85    4.21
  -7  -5  -9  124.97    3.12
   5   9  -7  112.80    3.42
  -5  -9  -7  123.03    3.31
   7   6   9  935.01   38.55
   7  -6  -9  868.93   35.21
   9  -7  -6  839.76   35.35
  -9   7  -6  922.89   38.18
   7  -6  -9  917.54   36.54
   6  -9  -7  898.75   36.50
  -7   6  -9  872.81   33.33
   6   9   7  919.11   38.45
  -7   6  -9  872.95   35.24
   9  -7  -6  852.10   32.98
  -6   9  -7  961.63   40.28
   7  -6   9  899.73   36.52
  -7  -6  -9  877.21   33.14
  -6   9   7  919.35   38.55
  -7  -6  -9  887.43   33.19
   9   7  -6  873.03   35.37
   6  -9   7  878.17   37.27
  -9   7   6  903.23   37.68
  -6  -9  -7  914.26   34.88
   9  -7   6  930.44   38.20
   7   6  -9  883.07   36.73
   6   9  -7  907.87   36.47
   7   7   9   34.25    2.05
  -9   7  -7   41.37    1.39
   7  -7  -9   34.26    2.10
   9  -7  -7   35.62    1.40
   7   9   7   34.85    1.53
  -7   7  -9   35.65    1.38
   9   7   7   35.19    1.41
   9  -7  -7   32.91    2.05
  -7   9  -7   36.01    1.50
   7  -9  -7   32.53    1.48
  -7   7  -9   37.46    1.00
   7  -7  -9   39.05    1.79
  -7   9  -7   37.20    0.85
   9  -7   7   34.83    1.36
   7  -7   9   38.49    2.17
  -9   7   7   36.54    1.45
   7   7  -9   34.18    1.38
   7  -9   7   34.33    1.52
  -7   9   7   34.82    1.50
   7   9  -7   36.82    1.82
  -7  -9  -7   36.08    0.99
  -7  -7  -9   33.48    0.97
   9   7  -7   35.09    1.21
  -8   9  -7   74.26    1.46
  -7   8  -9   76.36    1.89
   7  -8  -9   73.42    2.24
   9   7   8   73.17    3.15
   7   8   9   79.57    3.41
  -7   8  -9   73.72    3.17
   8  -9  -7   70.90    3.33
   7  -8  -9   71.40    3.35
  -9   7  -8   76.47    2.42
   9  -7  -8   71.68    2.03
   8   9   7   75.05    3.46
   9  -7  -8   76.18    2.60
  -8   9  -7   77.09    2.62
  -9  -7  -8   75.24    1.37
  -8   9   7   77.15    3.43
   8   9  -7   74.20    2.86
  -8  -9  -7   74.56    1.69
   8  -9   7   75.05    2.62
   9   7  -8   73.39    2.29
   9  -7   8   74.23    3.22
   7  -8   9   73.94    3.54
   7   8  -9   73.70    2.43
  -9  -7  -8   69.95    1.24
  -7  -8  -9   74.39    1.91
   0   9   8  665.48   25.03
   0   9  -8  658.49   24.75
  -9   8   0  684.46   25.15
   8   0   9  696.63   24.91
   0  -9  -8  679.28   25.53
   9   8   0  605.31   20.32
   9  -8   0  661.99   24.29
  -8   0  -9  640.54   22.85
   0   9   8  655.77   25.33
   8   0  -9  661.33   24.18
   0  -9   8  679.48   26.78
   1  -9  -8  758.95   28.94
   8  -1  -9  738.23   28.07
   1   9   8  752.58   29.87
   9   8   1  809.37   27.16
   9  -8  -1  734.45   29.14
  -1   9  -8  790.91   31.74
  -1  -9   8  788.27   30.73
  -8   1  -9  733.31   26.96
   8   1   9  811.96   30.38
  -9   8  -1  732.04   28.06
   9  -8   1  758.71   29.89
  -1   9   8  748.86   29.33
  -8  -1  -9  785.87   28.55
   1   9  -8  827.29   32.60
   1  -9   8  723.12   28.46
  -9   8   1  731.25   28.98
   8   1  -9  749.38   29.22
   9   8  -1  747.05   26.84
  -1  -9  -8  731.31   27.66
  -1   9   8  774.75   30.63
  -2   9  -8   78.98    2.53
   9   8   2   75.97    1.30
   8  -2  -9   77.81    2.32
   8  -2  -9   86.02    2.91
  -8   2  -9   77.99    2.02
   2  -9  -8   79.70    2.94
  -2  -9   8   79.68    2.68
  -9   8  -2   79.67    2.36
   9  -8  -2   79.17    2.94
   2   9   8   78.88    2.50
   8   2   9   80.04    2.47
   2  -9   8   75.76    3.41
   9  -8   2   74.63    2.26
  -2   9   8   77.33    2.33
  -9   8   2   81.17    2.96
   2   9  -8   80.17    2.52
  -2  -9  -8   77.81    2.12
  -2   9   8   80.54    2.44
   9   8  -2   77.44    2.03
  -8  -2  -9   77.90    1.94
  -9   8  -3    2.75    0.44
  -8   3  -9    4.32    0.34
  -3   9  -8    4.16    0.56
   9  -8  -3    2.80    0.78
   8   3   9    3.98    0.58
   3   9   8    3.43    0.89
   3  -9  -8    3.56    0.78
  -3  -9   8    3.03    0.59
   8  -3  -9    2.67    0.41
   8  -3  -9    2.80    0.44
  -3  -9  -8    6.51    0.53
   3   9  -8    5.14    0.53
  -8  -3  -9    4.02    0.29
  -3   9   8    5.03    0.74
   3  -9   8    3.97    0.62
   9   8  -3    3.85    0.28
  -9   8   3    2.80    0.76
  -8  -3  -9    2.99    0.25
   9  -8   3    2.81    0.46
  -3   9   8    3.83    0.48
   8   3  -9    3.80    0.48
   8  -4  -9  899.09   37.02
   4   9   8  849.10   35.68
   8   4   9  870.66   35.35
  -4   9  -8  934.75   38.93
  -9   8  -4  921.79   37.92
   8  -4  -9  917.33   37.20
   9  -8  -4  881.54   35.27
  -8   4  -9  891.64   36.08
   4  -9  -8  929.34   37.22
  -4   9   8  922.01   36.97
  -8  -4  -9  887.91   33.01
   4   9  -8  912.40   36.59
   8   4  -9  860.39   35.73
   9  -8   4  866.97   35.81
  -4  -9  -8  867.05   33.62
   9   8  -4  915.13   35.86
  -9   8   4  917.35   37.87
   4  -9   8  853.38   34.97
  -4   9   8  892.01   35.94
   8  -4   9  917.52   36.38
  -8  -4  -9  763.88   28.63
   8  -5  -9  184.73    6.04
  -9   8  -5  190.36    5.75
  -8   5  -9  190.41    5.01
  -8   5  -9  188.30    6.13
  -5   9  -8  193.33    6.82
   5   9   8  181.28    6.60
   5  -9  -8  193.56    6.07
   8   5   9  174.24    5.97
   8  -5  -9  180.62    6.38
   9  -8  -5  185.61    5.77
  -5   9   8  184.67    5.81
  -5  -9  -8  194.08    5.49
   5   9  -8  178.58    6.37
  -8  -5  -9  184.37    4.66
   9  -8   5  181.99    5.57
   9   8  -5  181.76    5.60
  -8  -5  -9  198.61    4.90
   8   5  -9  181.66    6.32
   8  -5   9  189.96    6.47
   5  -9   8  182.79    6.90
  -9   8   5  186.17    5.76
   6  -9  -8    1.26    0.77
  -9   8  -6    0.98    0.63
  -8   6  -9    1.16    0.21
   6   9   8    1.05    0.77
   8  -6  -9    1.73    0.43
  -6   9  -8    0.97    0.45
  -8   6  -9    2.45    0.37
   8   6   9    0.98    0.39
   9  -8  -6    1.00    0.69
   8  -6   9    0.72    0.66
  -8  -6  -9    0.75    0.20
   9  -8   6    1.20    0.42
   9   8  -6    1.18    0.47
   8   6  -9    1.59    0.39
   6  -9   8    0.95    0.49
  -6   9   8    1.13    0.72
   6   9  -8    0.89    0.40
  -9   8   6    0.83    0.42
   8  -7  -9  120.48    4.82
  -8   7  -9  127.19    4.58
   7   9   8  122.81    4.06
   9  -8  -7  120.68    3.94
   7  -9  -8  116.05    3.89
  -7   9  -8  127.92    3.14
   9   8   7  127.80    4.90
   9  -8  -7  123.54    3.32
  -8   7  -9  117.37    2.91
  -7   9  -8  130.02    4.19
   8   7   9  121.66    3.83
   8  -7  -9  123.44    3.61
  -9   8  -7  126.78    4.66
  -8  -7  -9  123.26    3.02
  -7  -9  -8  122.27    3.19
  -8  -7  -9  126.41    3.03
   8  -7   9  129.54    4.12
  -9   8   7  123.43    4.83
   8   7  -9  123.07    4.50
   7  -9   8  122.74    5.06
  -7   9   8  123.65    4.09
   9   8  -7  134.20    4.37
   7   9  -8  130.72    4.64
   9  -8   7  122.52    4.75
   8   9   8  789.22   32.48
  -8   8  -9  683.39   24.59
  -8   9  -8  673.74   23.08
   9  -8  -8  751.48   31.08
   8  -8  -9  753.43   29.75
   9  -8  -8  715.85   27.10
  -8   8  -9  765.85   30.09
  -9   8  -8  761.01   31.06
   9   8   8  760.34   31.26
   8   8   9  773.09   30.28
   8  -8  -9  734.71   29.07
   8  -9  -8  723.18   28.72
  -8   9  -8  803.08   31.43
  -8  -9  -8  744.43   26.44
   9  -8   8  764.56   31.42
  -8   9   8  767.47   31.79
  -9  -8  -8  706.67   23.47
   8  -9   8  735.40   29.28
   8   8  -9  763.19   29.69
   8  -8   9  746.25   29.68
  -9  -8  -8  695.72   22.98
   8   9  -8  763.28   29.60
   9   8  -8  766.53   30.62
  -8  -8  -9  776.58   27.61
   9   8  -8  765.86   30.61
   0   9   9 1923.72   96.71
  -9   9   0 1945.95   97.77
   0   9  -9 1982.80  101.82
   0  -9  -9 1956.94   98.93
   9  -9   0 1807.03   92.79
   9   9   0 1935.03   92.19
  -9   0  -9 1967.67   96.29
   0  -9   9 1840.33   94.03
   9   0   9 1798.07   88.34
   9   0  -9 1922.67   97.34
  -1  -9   9   38.91    2.51
   9   1   9   39.08    1.07
   9  -9  -1   39.52    1.52
   9  -1  -9   37.03    1.32
   1   9   9   40.98    2.11
   1  -9  -9   38.11    1.39
  -1   9  -9   40.00    1.59
  -9   9  -1   35.97    1.39
  -9   1  -9   38.70    1.01
   9   9   1   40.26    0.89
   1   9  -9   39.12    1.63
   9   9  -1   35.51    1.05
   9   1  -9   36.88    1.75
  -1   9   9   38.17    1.48
  -9  -1  -9   38.41    1.11
  -1  -9  -9   36.02    1.24
   1  -9   9   40.68    2.51
   9  -9   1   42.71    2.13
  -9   9   1   36.13    1.42
  -2  -9   9   95.89    3.30
  -2   9  -9   90.08    3.85
   9  -9  -2   89.95    3.61
   9   9   2   95.15    1.96
   9  -2  -9   94.33    2.85
   2   9   9   91.88    2.98
   2  -9  -9   93.87    2.93
   9  -2  -9   98.12    2.85
  -9   2  -9   94.92    2.80
   9   2   9   94.71    2.93
  -9   9  -2   96.88    3.01
  -2   9   9   98.53    3.05
   2  -9   9   95.90    4.24
   9   9  -2   92.58    2.54
  -9   9   2   98.61    3.69
   2   9  -9   94.29    3.08
  -9  -2  -9   98.80    2.41
   9   2  -9   94.06    2.73
   9  -9   2   95.27    2.96
  -2  -9  -9  105.48    2.85
   9  -3  -9  233.42    8.02
  -9   3  -9  235.53    6.88
  -3   9  -9  246.28    8.79
   9  -3  -9  244.86    8.04
   3  -9  -9  242.37    7.64
  -9   9  -3  236.07    8.22
   9  -9  -3  229.10    8.27
   9   3   9  235.68    6.97
   3   9   9  238.23    8.63
  -3   9   9  236.99    8.35
   9   9  -3  249.30    7.40
  -3  -9  -9  238.77    7.02
   9  -9   3  230.95    7.35
  -9  -3  -9  223.45    5.86
  -9  -3  -9  242.98    6.38
   9   3  -9  228.12    7.21
  -9   9   3  231.40    8.20
   3   9  -9  251.57    8.02
   3  -9   9  231.13    7.75
   9  -4  -9  219.05    6.89
  -4   9  -9  230.34    7.39
   4  -9  -9  235.40    8.29
   9   4   9  217.78    6.54
   4   9   9  228.39    7.35
   9  -4  -9  230.81    7.53
  -9   9  -4  224.22    7.10
  -9   4  -9  236.35    7.43
   9  -9  -4  223.30    7.10
  -4  -9  -9  221.47    6.78
  -9  -4  -9  210.33    5.31
   9   4  -9  212.17    7.48
   4   9  -9  221.50    7.11
  -9   9   4  227.05    7.99
  -9  -4  -9  242.19    6.09
   9  -4   9  226.23    6.80
  -4   9   9  235.99    7.36
   9   9  -4  227.67    6.98
   4  -9   9  224.49    7.49
   9  -9   4  213.65    7.73
   9  -5  -9   78.03    2.28
   5  -9  -9   76.09    2.62
  -9   9  -5   76.49    3.21
  -5   9  -9   82.63    2.73
   5   9   9   77.84    2.66
   9  -9  -5   78.69    2.59
   9  -5  -9   79.80    3.23
   9   5   9   76.60    2.30
  -9   5  -9   83.82    2.81
  -9  -5  -9   74.86    1.60
  -9   9   5   79.40    2.59
  -5  -9  -9   78.87    2.31
   9  -9   5   78.04    2.55
  -9  -5  -9   79.25    1.64
   9  -5   9   78.46    3.00
   5  -9   9   77.39    3.74
   5   9  -9   79.88    3.31
   9   5  -9   80.06    2.52
   9   9  -5   77.70    2.56
   6   9   9  232.75    8.47
   9   6   9  210.87    7.50
   6  -9  -9  216.41    7.15
  -9   6  -9  225.31    6.95
  -6   9  -9  243.90    6.63
   9  -6  -9  219.00    7.22
  -6   9  -9  226.88    7.35
  -9   9  -6  234.01    8.23
   9  -9  -6  220.38    7.19
   9  -6  -9  220.39    7.13
   9   9  -6  214.83    6.52
   9  -6   9  217.19    7.75
  -9  -6  -9  231.95    5.64
  -9  -6  -9  227.81    5.66
   9  -9   6  219.10    8.01
   9   6  -9  224.46    7.78
   6  -9   9  211.41    7.22
  -6  -9  -9  228.25    6.55
  -9   9   6  219.96    7.20
   6   9  -9  220.29    7.04
   9  -7  -9   10.02    1.28
   7  -9  -9    8.86    0.90
  -9   9  -7    8.70    1.18
   9  -9  -7    9.37    0.83
   7   9   9    9.46    0.87
   9  -7  -9    8.84    0.87
  -7   9  -9    9.12    0.43
   9   7   9   10.32    1.16
   9   9   7   13.16    0.84
  -9   7  -9    7.87    1.08
   7  -9   9    8.93    1.43
   9   9  -7    8.67    0.93
  -9  -9  -7    8.28    0.17
   9  -9   7    9.45    1.25
   9  -7   9    9.51    0.78
  -9   9   7    9.15    1.27
  -9  -7  -9    9.22    0.26
  -9  -7  -9   10.93    0.28
  -9  -9  -7   10.06    0.19
  -7  -9  -9    8.34    0.47
   7   9  -9    8.13    1.12
   9   7  -9    9.55    1.07
  -8   9  -9   21.12    1.72
  -9   9  -8   22.04    1.68
   8   9   9   29.48    1.87
  -9   8  -9   21.78    1.58
   9   9   8   22.11    1.27
   9  -8  -9   19.80    1.19
   9  -9  -8   19.49    1.82
   8  -9  -9   21.36    1.92
   9   8   9   22.50    1.75
  -8   9  -9   18.91    0.54
   9  -8  -9   20.54    1.21
  -8  -9  -9   21.22    0.64
   9   8  -9   23.68    1.51
   8   9  -9   19.96    1.02
  -9  -8  -9   20.27    0.45
   9  -9   8   21.18    1.17
   8  -9   9   20.78    1.27
  -9   9   8   21.33    1.19
  -9  -8  -9   19.44    0.45
   9  -8   9   19.57    1.15
   9   9  -8   20.99    0.98
   9  -9  -9 1930.70  103.82
   9   9   9 2000.31  104.71
  -9   9  -9 2044.73  107.41
   9  -9   9 2112.28  110.59
   9   9  -9 1952.24  101.89
  10   0   0  142.24    3.41
   0   0 -10  142.77    3.85
   0 -10   0  139.66    3.82
   0  10   0  139.09    4.32
 -10   0  -1   15.47    0.40
  10   0  -1   14.88    0.53
  -1 -10   0   15.73    0.66
   0  -1 -10   15.58    0.66
   0   1 -10   15.40    0.64
  -1  10   0   15.26    1.01
   1  10   0   14.82    0.63
   0   1 -10   20.20    0.74
   1 -10   0   15.65    0.99
  10   0   1   16.72    0.45
  -2 -10   0   16.82    0.64
   2 -10   0   16.43    0.74
   0   2 -10   15.78    0.64
 -10   0  -2   15.10    0.39
  -2  10   0   17.03    0.75
   2  10   0   16.02    0.61
  10   0  -2   16.42    0.60
   0  -2 -10   16.34    1.05
  10   0   2   17.04    0.43
   0   2 -10   15.75    1.07
 -10   0  -3  667.10   21.97
   0   3 -10  658.66   23.88
  -3  10   0  648.03   23.63
   3 -10   0  679.98   24.54
   0  -3 -10  704.84   26.09
  10   0  -3  668.44   23.06
  10   0   3  651.82   21.35
  -3 -10   0  662.83   23.55
   0  -3 -10  675.93   24.79
   3  10   0  674.84   24.55
  10   0   4  837.11   30.41
   4  10   0  829.41   32.04
   0  -4 -10  849.40   33.27
   0   4 -10  787.65   30.59
  -4 -10   0  871.37   33.51
  10   0  -4  886.06   33.39
 -10   0  -4  858.36   30.09
  -4  10   0  823.61   32.00
   0  -4 -10  859.41   33.11
  10   0   4  830.59   29.22
   4 -10   0  801.89   31.11
  -5 -10   0   23.81    0.72
 -10   0  -5   24.81    0.55
  10   0  -5   24.00    0.95
  10   0   5   22.92    0.55
   0   5 -10   22.77    0.95
   0  -5 -10   22.93    1.14
   0   5  10   24.54    1.40
   5  10   0   22.15    0.91
  -5  10   0   24.22    1.40
  10   0   5   24.89    0.69
   5 -10   0   21.04    1.36
   0  -5 -10   26.67    1.04
  -6  10   0   33.73    1.28
   6  10   0   36.07    1.15
  -6  10   0   37.30    0.95
  10   0   6   33.99    0.93
   0  -6 -10   34.17    1.52
   0   6  10   45.84    1.90
   6 -10   0   36.43    1.85
 -10   0  -6   35.27    0.82
   0   6 -10   34.49    1.78
  -6 -10   0   39.21    1.24
  10   0  -6   35.39    1.02
   0  -7 -10  330.26   10.33
   0   7  10  328.83   10.61
  10   0   7  321.03    9.16
   7  10   0  333.13   10.03
  -7  10   0  314.20   11.10
  10   0  -7  327.86   10.62
   0   7 -10  294.36    9.70
  -7  10   0  344.00    9.52
   7 -10   0  320.42   10.37
 -10   0  -7  321.65    8.89
  -7 -10   0  331.92   10.12
   0   8 -10 2665.90  148.37
  -8 -10   0 2746.39  148.17
   8  10   0 2587.36  140.70
   8 -10   0 2570.33  145.03
  -8  10   0 2574.79  143.48
  10   0  -8 2472.41  136.67
 -10   0  -8 2662.60  143.40
  10   0   8 2596.09  141.70
   0   8  10 2612.95  147.80
   0  -8 -10 2613.52  144.72
   0   9  10 1879.67   97.43
   0  -9 -10 1816.24   91.34
   0  -9  10 1875.41   98.31
   0   9 -10 1870.49   97.30
   9 -10   0 1933.40   99.44
  -9  10   0 1918.19   96.95
  10   0   9 1826.57   90.43
   9  10   0 1838.76   89.13
 -10   0  -9 1942.97   94.63
  10   0  -9 1938.75   98.32
   1   0 -10    3.72    0.39
  -1   0 -10    4.02    0.62
   0  10  -1    3.79    0.40
   0 -10   1    4.15    0.63
  10  -1   0    3.92    0.21
   0 -10  -1    4.66    0.38
  10   1   0    4.17    0.22
   0  10   1    4.29    0.37
  -1   0 -10    3.88    0.56
  -1 -10   1  925.81   36.39
   1  -1 -10  910.32   35.12
 -10   1  -1  868.51   32.10
   1 -10  -1  871.16   34.61
   1  10   1  840.42   32.67
  10  -1  -1  896.10   33.66
  -1   1 -10  874.45   34.28
  10   1   1  890.57   31.38
  -1   1 -10  844.73   32.89
  -1  10  -1  858.90   33.55
  -1 -10  -1  906.39   34.77
   1  10  -1  855.69   34.14
  10   1  -1  940.04   34.26
  -1  -1 -10  917.51   35.95
   1   1 -10  895.48   34.48
  -1  10   1  873.54   34.84
  10  -1   1  907.82   33.41
   1   1 -10  835.48   32.71
   1 -10   1  896.22   34.76
  -2  10  -1   18.00    0.76
  10  -1  -2   18.37    0.69
  -1   2 -10   16.08    0.60
  10   1   2   17.14    0.32
   1  -2 -10   17.39    1.10
   2 -10  -1   16.61    1.07
  -1   2 -10   17.63    1.06
 -10   1  -2   17.11    0.49
  -2 -10   1   17.91    0.67
   2  10   1   15.55    0.60
  10   1  -2   17.42    0.57
  -2 -10  -1   17.57    0.88
  -1  -2 -10   17.22    0.71
   1   2 -10   17.46    1.15
  10  -1   2   17.54    0.52
   2 -10   1   18.77    1.17
  -2  10   1   17.11    1.10
   2  10  -1   17.41    0.68
   3 -10  -1  149.45    4.73
   1  -3 -10  148.52    4.49
 -10   1  -3  146.59    3.48
  10   1   3  155.45    3.12
  -1   3 -10  141.43    3.99
   1  -3 -10  160.73    4.96
  -3 -10   1  146.31    3.91
  10  -1  -3  146.59    3.98
  -1   3 -10  145.05    4.25
   3  10   1  137.04    4.00
  -3  10  -1  145.22    4.71
   3  10  -1  140.16    3.81
  -3  10   1  139.11    4.56
  -1  -3 -10  147.46    3.94
  -1  -3 -10  155.19    4.27
  -3 -10  -1  147.09    3.86
  10  -1   3  147.68    3.56
   3 -10   1  142.95    4.63
  10  -1   3  147.89    3.38
  10   1  -3  158.05    4.02
   1   3 -10  149.34    4.23
   1  -4 -10  223.33    6.55
   4  10   1  206.39    6.07
   1  -4 -10  214.17    6.69
  -4 -10   1  227.48    6.32
  -1   4 -10  202.98    6.03
  -4  10  -1  205.79    6.20
  10  -1  -4  220.30    6.33
 -10   1  -4  211.05    5.25
   4 -10  -1  216.19    6.38
   1   4  10  230.66    6.69
  -1  -4 -10  239.34    6.89
  10   1  -4  215.30    5.73
 -10  -1  -4  208.76    4.65
   4 -10   1  201.65    6.70
  10  -1   4  235.67    5.76
  10  -1   4  218.17    5.64
  -1  -4 -10  215.01    6.08
   1   4 -10  206.12    6.84
   4  10  -1  210.04    6.35
  -4 -10  -1  228.59    6.59
  -4  10   1  227.21    6.03
  -4  10   1  219.67    7.07
  10  -1  -5  992.13   40.01
   1  -5 -10 1002.85   41.08
  -5 -10   1 1051.05   43.11
  -5  10  -1 1043.09   44.02
 -10   1  -5  955.66   37.28
  10   1   5 1078.48   42.56
   1   5  10 1057.43   44.40
   5 -10  -1 1065.20   44.67
  -1   5 -10  973.85   40.16
   1  -5 -10 1116.48   45.61
   5  10   1  979.50   39.16
   5  10  -1 1035.99   42.44
  -5 -10  -1 1076.14   43.45
  10  -1   5  982.70   37.78
 -10  -1  -5 1015.89   36.87
  -1  -5 -10 1083.67   44.37
  -1  -5 -10 1040.02   42.98
  -5  10   1 1030.30   40.67
  -5  10   1  989.18   40.93
   5 -10   1 1020.37   41.92
  10   1  -5 1079.23   43.66
  10  -1   5 1030.97   40.02
   1   5 -10  987.83   41.72
  -6  10  -1  852.63   31.40
   1  -6 -10  878.94   34.53
  10   1   6  833.14   31.56
  -1   6 -10  830.39   32.69
  -6 -10   1  856.35   33.40
   1   6  10  865.53   34.02
  -6  10  -1  857.53   33.91
  10  -1  -6  824.89   31.87
 -10   1  -6  821.46   30.49
   6 -10  -1  815.95   32.26
   6  10   1  933.56   35.29
   1  -6 -10  840.68   32.93
 -10  -1  -6  790.16   27.71
  -1   6  10  896.37   36.24
  -6  10   1  867.69   34.21
  10  -1   6  864.04   31.95
   6  10  -1  863.12   33.45
  -6 -10  -1  864.05   33.02
   1   6 -10  827.96   32.81
  -6  10   1  867.99   32.61
  10   1  -6  875.81   34.16
  10  -1   6  865.96   31.54
  -1  -6 -10  877.73   34.64
   6 -10   1  870.14   35.16
   7  10   1  175.30    4.78
  10  -1  -7  170.42    4.88
  -1   7 -10  164.66    5.18
   1   7  10  183.65    5.52
   1  -7 -10  184.41    5.97
 -10   1  -7  181.58    4.82
  -7 -10   1  189.31    5.42
   7 -10  -1  170.68    5.31
  10   1   7  165.46    4.66
  -7  10  -1  180.06    4.32
  -7  10  -1  183.91    6.36
  -7  10   1  180.13    4.59
  10   1  -7  176.16    5.42
   1   7 -10  181.90    5.62
  -1   7  10  185.58    5.61
  -1  -7 -10  178.91    5.62
   7 -10   1  172.48    6.08
 -10  -1  -7  191.19    4.52
  -7  10   1  180.53    6.31
  -7 -10  -1  185.49    5.08
   7  10  -1  178.43    5.12
  10  -1   7  180.32    4.59
  10   1   8  175.61    5.03
  -8  10  -1  174.51    6.38
  -8 -10   1  176.13    5.05
 -10   1  -8  184.28    5.11
   1  -8 -10  185.53    6.23
   8  10   1  170.73    4.59
   8 -10  -1  178.22    6.54
  10  -1  -8  177.03    5.25
   1   8  10  181.66    5.68
  -1   8 -10  183.55    6.69
   1  -8  10  175.38    7.03
  -8  10   1  175.59    5.56
  -8 -10  -1  187.27    4.98
 -10  -1  -8  188.79    4.74
   8  10  -1  173.95    4.99
  10   1  -8  176.10    5.69
  -1  -8 -10  179.35    5.25
  -1   8  10  182.99    6.58
   8 -10   1  175.26    6.50
   1   8 -10  177.53    6.71
   9 -10  -1  543.74   21.15
  -9  10  -1  534.32   19.64
   9  10   1  578.39   18.65
   1   9  10  537.89   19.77
  10  -1  -9  537.12   19.24
  10   1   9  496.95   17.72
 -10   1  -9  529.37   18.24
   1  -9 -10  542.11   19.53
  -1   9 -10  535.03   19.71
  10   1  -9  540.33   19.26
  -9  10   1  511.87   20.26
  -1  -9 -10  531.16   19.82
   9 -10   1  528.64   20.67
   1   9 -10  525.45   21.07
  -1   9  10  542.65   21.23
 -10  -1  -9  560.67   18.42
   9  10  -1  573.45   19.48
   1  -9  10  537.47   20.30
   0  10  -2   20.05    0.78
 -10   2   0   18.02    0.63
  10  -2   0   17.97    0.68
   0 -10   2   17.51    1.10
   0 -10  -2   18.29    0.99
  -2   0 -10   17.15    0.64
  10   2   0   18.12    0.40
   0  10   2   18.33    0.69
  -2   0 -10   17.57    0.99
   2   0 -10   18.06    0.72
  -2   1 -10  560.90   19.70
  -2   1 -10  584.24   20.21
  -1 -10   2  608.12   21.94
   1  10   2  610.45   21.76
  -1  10  -2  609.14   22.31
  10   2   1  557.72   16.69
 -10   2  -1  595.53   20.05
   2  -1 -10  633.75   22.04
  10   2   1  591.59   17.74
  10  -2  -1  594.89   20.43
   1 -10  -2  585.01   20.48
  -2  -1 -10  608.07   21.10
  10   2  -1  606.12   19.47
  -1  10   2  592.17   21.52
  -2  -1 -10  601.24   20.87
   2   1 -10  645.81   22.42
  10  -2   1  611.32   20.19
   1  10  -2  587.13   20.69
 -10   2   1  605.56   20.70
   1 -10   2  621.81   22.45
  -1 -10  -2  606.20   20.92
 -10   2  -2    1.26    0.24
   2  10   2    1.09    0.40
   2  -2 -10    2.38    0.51
  -2   2 -10    1.65    0.51
  10  -2  -2    1.57    0.34
  -2  10  -2    2.77    0.35
   2 -10  -2    1.40    0.33
   2  -2 -10    2.96    0.54
  -2 -10   2    3.67    0.32
  -2   2 -10    3.15    0.26
  10   2  -2    1.44    0.22
   2  10  -2    1.88    0.30
  -2  -2 -10    1.32    0.51
   2   2 -10    0.95    0.36
   2 -10   2    1.39    0.36
  -2  10   2    1.41    0.53
  10  -2   2    1.64    0.17
  -2 -10  -2    1.86    0.41
   3 -10  -2  463.87   15.65
 -10   2  -3  463.17   14.78
   2   3  10  535.97   18.34
  -3 -10   2  494.12   17.01
   2  -3 -10  490.63   16.97
   2  -3 -10  508.46   16.94
  10  -2  -3  478.75   15.42
   3  10   2  504.72   16.82
  -2   3 -10  446.05   14.65
  -2   3 -10  474.23   15.82
  -3  10  -2  485.39   16.42
  -3 -10  -2  470.96   15.32
  -2  -3 -10  492.38   16.47
  10  -2   3  492.52   15.60
  -2  -3 -10  480.78   16.24
   3 -10   2  461.58   15.68
  10   2  -3  513.03   16.18
  10  -2   3  477.17   13.74
   2   3 -10  464.66   16.53
   3  10  -2  467.41   15.63
  -3  10   2  492.87   15.97
  -3  10   2  491.06   16.52
  -2   4 -10  896.01   35.40
   2  -4 -10  974.31   38.94
   2   4  10  965.49   38.68
   4 -10  -2  926.08   37.32
   2  -4 -10  992.98   39.73
  -4 -10   2 1008.53   40.65
   4  10   2  959.66   37.57
 -10   2  -4  948.10   36.14
  -4  10  -2  977.10   39.33
  10  -2  -4  927.71   37.20
  -2   4 -10  930.42   37.27
  -2  -4 -10  968.31   38.86
   2   4 -10  990.72   39.95
  10  -2   4  914.62   33.11
  -4 -10  -2 1013.32   40.17
   4 -10   2  971.58   39.02
  -2  -4 -10  960.94   37.93
  -4  10   2  986.01   38.47
  10   2  -4  957.70   37.42
  10  -2   4  933.93   36.11
  -4  10   2  941.54   37.98
   4  10  -2  995.91   40.21
  -2   5 -10   47.43    1.54
  10  -2  -5   51.59    1.41
  -5  10  -2   49.96    2.22
   5 -10  -2   51.44    2.24
   5  10   2   51.18    1.48
  10   2   5   50.78    1.49
 -10   2  -5   49.88    1.15
  -5 -10   2   51.35    1.44
   2  -5 -10   50.47    2.01
   2  -5 -10   52.73    1.69
   2   5  10   53.65    1.66
  -2  -5 -10   55.24    1.77
   2   5 -10   48.65    1.67
  10  -2   5   50.13    1.40
   5 -10   2   48.03    2.23
  -5 -10  -2   54.73    1.32
  10   2  -5   51.44    1.28
  -5  10   2   54.55    1.56
  -5  10   2   55.59    1.73
  10  -2   5   55.37    1.13
   5  10  -2   53.73    1.46
   2   6  10  317.23   10.10
   2  -6 -10  325.68   11.19
  -2   6 -10  309.41    9.87
   2  -6 -10  304.30    9.67
   6 -10  -2  316.72   10.97
 -10   2  -6  313.47    9.33
  -6 -10   2  330.46    9.99
  10   2   6  318.04    9.24
  -6  10  -2  314.63   10.17
   6  10   2  317.33    9.13
  10  -2  -6  311.39   10.06
  -6  10  -2  337.45    9.34
  -6  10   2  337.61    9.97
   6 -10   2  303.95    9.81
  -6  10   2  306.79   10.73
  10   2  -6  302.76    9.59
  -2  -6 -10  312.52   10.11
   2   6 -10  311.78   10.93
  -6 -10  -2  316.46    9.47
   6  10  -2  324.47   10.24
  10  -2   6  325.74    9.70
   7  10   2  596.03   19.93
  -2   7 -10  544.71   20.84
   2  -7 -10  547.52   20.52
  -7  10  -2  558.62   20.28
  10  -2  -7  567.31   19.92
 -10   2  -7  585.50   20.04
  -7 -10   2  595.83   20.44
  10   2   7  591.28   20.48
   2   7  10  576.78   21.71
  -7  10  -2  572.41   17.92
   7 -10  -2  583.87   21.94
   2   7 -10  592.73   22.41
   7  10  -2  594.04   20.92
   7 -10   2  549.26   21.02
  -2   7  10  595.35   21.42
 -10  -2  -7  523.68   15.80
  -7  10   2  550.29   21.00
  -7 -10  -2  613.60   20.49
   2  -7  10  564.50   22.04
  -2  -7 -10  551.31   19.24
  10  -2   7  562.17   18.94
 -10  -2  -7  504.97   15.33
  10   2  -7  572.32   20.49
  -7  10   2  558.92   18.45
  10   2   8   23.89    0.75
   8 -10  -2   22.47    1.70
  -8  10  -2   22.74    1.65
   2  -8 -10   23.71    1.03
   2   8  10   23.94    1.71
  10  -2  -8   22.20    1.39
   8  10   2   24.00    0.69
 -10   2  -8   22.34    0.68
  10  -2  -8   25.75    1.25
  -2   8 -10   22.14    1.15
 -10  -2  -8   22.54    0.61
   8 -10   2   24.43    1.73
  -8 -10  -2   24.79    0.75
  10   2  -8   23.25    1.20
  -8  10   2   22.74    1.14
   2   8 -10   22.90    1.74
   2  -8  10   24.56    1.36
  -2  -8 -10   22.87    1.18
   8  10  -2   24.57    0.75
  -2   8  10   27.86    1.69
  10  -2  -9 1749.03   85.51
  -2   9 -10 1788.94   89.96
   2  -9 -10 1639.36   80.66
   2   9  10 1667.99   84.28
 -10   2  -9 1727.14   82.10
  10   2   9 1665.28   81.52
   9 -10  -2 1674.26   82.21
  -9  10  -2 1792.01   89.75
   9  10   2 1736.75   79.99
  10  -2  -9 1700.03   84.52
 -10  -2  -9 1635.96   75.70
   9 -10   2 1697.92   85.45
  -2  -9 -10 1725.97   84.96
   2   9 -10 1775.33   87.47
   2  -9  10 1636.12   81.73
  -9 -10  -2 1685.29   76.43
  10   2  -9 1726.43   85.49
 -10  -2  -9 1736.23   78.61
  -9  10   2 1701.58   85.86
  -2   9  10 1741.90   87.76
   9  10  -2 1762.16   84.58
 -10   3   0   34.81    0.88
   0  10  -3   32.75    1.15
   3   0 -10   35.20    1.55
   0  10   3   33.30    1.40
   0 -10   3   31.68    1.11
  10   3   0   38.12    0.69
  10  -3   0   33.02    1.09
   0 -10  -3   32.75    1.02
  -3   0 -10   32.40    1.32
  10   3   0   34.83    0.66
  -3   0 -10   33.43    1.01
   3  -1 -10    8.61    0.83
  -1  10  -3    7.93    0.55
   1 -10  -3    8.11    0.50
  10  -3  -1    8.57    0.55
  -3   1 -10    7.51    0.41
  -1 -10   3    8.63    0.53
   1  10   3    7.71    0.67
  -3   1 -10    8.19    0.49
   1  10  -3    8.03    0.81
  -3  -1 -10    8.16    0.45
  -3  -1 -10    7.57    0.44
  10  -3   1    8.16    0.51
   1 -10   3    7.51    0.56
  10   3  -1    8.01    0.30
  -1 -10  -3    7.75    0.68
 -10   3   1    8.14    0.36
  10   3  -1    8.33    0.27
   3  -2 -10  505.38   16.78
  -2  10  -3  499.46   17.58
  10  -3  -2  464.73   15.51
  -3   2 -10  458.49   15.81
  -3   2 -10  449.25   14.66
   2 -10  -3  460.43   15.41
 -10   3  -2  439.12   14.45
   3  -2 -10  490.21   16.34
  -2 -10   3  483.15   16.84
   2  10   3  485.75   16.40
  10  -3   2  489.70   15.81
  -3  -2 -10  494.12   16.34
  -2 -10  -3  477.72   16.03
   2 -10   3  486.05   16.32
   2  10  -3  486.68   16.90
 -10   3   2  482.76   16.02
   3   2 -10  494.42   17.51
  10   3  -2  496.43   15.17
  -2  10   3  473.72   15.92
  10   3  -2  469.61   14.56
  -2  10   3  486.07   16.44
  -3 -10   3  839.65   32.22
   3   3  10  849.80   32.57
  10  -3  -3  793.17   30.01
   3  -3 -10  891.20   34.08
  -3  10  -3  807.11   31.46
  -3   3 -10  782.68   29.57
  -3   3 -10  817.10   32.07
   3  10   3  844.60   32.48
   3 -10  -3  838.20   32.22
   3  -3 -10  878.16   34.44
 -10   3  -3  798.98   29.65
  10  -3   3  860.42   32.18
  10   3  -3  861.90   31.62
   3  10  -3  874.98   34.16
  -3  10   3  883.68   34.05
   3 -10   3  819.87   32.64
  -3 -10  -3  828.08   31.22
  -3  10   3  846.03   32.68
   3   3 -10  809.84   31.66
  -3  -3 -10  833.22   31.40
  10   3  -3  789.63   29.33
  -3  -3 -10  835.16   32.08
 -10   3   3  820.69   30.99
  -3   4 -10  122.90    3.99
   4  10   3  138.30    3.71
   3   4  10  133.04    4.20
  -4 -10   3  128.73    3.53
  -3   4 -10  117.54    3.40
   3  -4 -10  126.33    3.57
  -4  10  -3  121.93    3.61
 -10   3  -4  127.28    3.36
  10  -3  -4  126.45    3.26
  10  -3  -4  125.41    3.71
   4 -10  -3  129.75    3.70
   3  -4 -10  138.00    4.48
  10   3  -4  123.56    3.25
  -4  10   3  120.07    4.10
  -4 -10  -3  129.90    3.27
   4  10  -3  115.34    3.66
  -3  -4 -10  126.04    3.28
  10  -3   4  125.98    3.39
  10   3  -4  125.19    3.12
   3   4 -10  124.08    4.38
  -4  10   3  126.97    3.64
   4 -10   3  123.64    4.23
  10  -3  -5  124.31    3.33
  -3   5 -10  112.03    3.87
   5 -10  -3  122.77    4.19
 -10   3  -5  124.91    3.09
  -3   5 -10  111.01    3.23
   3  -5 -10  125.85    4.13
   5  10   3  120.13    3.24
  -5 -10   3  120.34    3.36
   3  -5 -10  126.50    3.63
   3   5  10  126.05    4.09
  -5  10  -3  119.68    4.21
  10  -3  -5  118.13    3.20
  -5  10   3  118.17    4.07
  -5  10   3  128.21    3.53
  10   3  -5  123.16    3.34
  10   3  -5  126.24    3.22
  -5 -10  -3  129.53    3.45
   3   5 -10  121.76    3.64
   5  10  -3  124.64    3.37
   5 -10   3  113.63    3.40
  -3  -5 -10  118.30    3.44
  10  -3   5  122.94    3.35
   3   6  10 1044.37   44.94
   6  10   3 1167.87   46.83
  10   3   6 1098.57   45.39
  -6  10  -3 1069.66   46.28
  10  -3  -6 1004.97   42.66
  10  -3  -6 1034.81   43.20
   6 -10  -3 1050.93   45.26
 -10   3  -6 1043.47   42.23
   3  -6 -10 1146.63   47.69
   3  -6 -10 1089.44   46.68
  -3   6 -10 1047.97   44.01
  -6 -10   3 1072.01   45.56
  10   3  -6 1050.91   43.78
  -6  10   3 1078.84   44.49
  -3  -6 -10 1034.39   42.58
   6  10  -3 1077.08   45.24
  -6  10   3 1084.48   46.79
   3  -6  10 1064.93   45.15
  -6 -10  -3 1092.48   44.02
  10  -3   6 1084.16   44.51
  10   3  -6 1039.13   42.80
   6 -10   3 1043.64   45.15
   3   6 -10 1023.53   43.24
  -7 -10   3  253.57    8.00
   3  -7 -10  236.77    7.47
   7  10   3  251.56    6.70
   3  -7 -10  250.93    7.86
  -3   7 -10  242.15    8.50
   3   7  10  242.83    7.65
  10   3   7  239.80    7.40
  -7  10  -3  253.19    8.06
  10  -3  -7  250.24    7.77
 -10   3  -7  241.13    7.35
  -7  10  -3  266.94    6.74
   7 -10  -3  251.85    8.81
  10  -3  -7  231.46    7.71
  -7  10   3  248.83    8.74
   3  -7  10  254.54    9.23
  -3  -7 -10  238.50    7.48
  10  -3   7  238.95    6.91
  -7  10   3  246.82    7.15
   7 -10   3  242.41    7.67
  10   3  -7  256.84    7.68
  10   3  -7  246.62    7.68
  -7 -10  -3  264.68    7.34
   7  10  -3  249.14    7.81
   3   7 -10  246.67    7.85
  10  -3  -8  217.49    7.45
   3  -8 -10  236.60    7.38
  -3   8 -10  219.93    7.11
  -8  10  -3  233.66    7.40
   8  10   3  244.65    6.41
  10  -3  -8  230.00    7.28
  10   3   8  228.83    7.09
   3   8  10  224.48    7.16
 -10   3  -8  232.85    6.99
   8 -10  -3  225.98    7.22
  10  -3   8  229.18    7.12
   8 -10   3  229.09    7.26
   3  -8  10  219.29    7.40
  -8 -10  -3  227.39    6.02
  10   3  -8  221.64    7.50
   8  10  -3  227.95    7.00
  -8  10   3  223.33    7.14
   3   8 -10  229.18    7.35
 -10  -3  -8  212.20    4.89
 -10  -3  -8  228.72    5.27
  10   3  -8  232.32    6.85
  -3  -8 -10  216.23    6.80
  -9  10  -3  535.32   19.38
   3   9  10  523.42   19.00
  10  -3  -9  523.56   18.67
   3  -9 -10  500.43   18.13
   9 -10  -3  511.41   19.74
  10  -3  -9  533.59   19.47
  -3   9 -10  490.89   18.16
  10   3   9  513.36   18.40
   9  10   3  504.94   15.32
 -10   3  -9  515.39   17.63
   9  10  -3  522.71   17.63
  -3  -9 -10  504.44   18.16
  -9  10   3  522.18   19.00
 -10  -3  -9  549.97   16.61
   9 -10   3  514.81   18.60
 -10  -3  -9  524.45   16.37
   3   9 -10  499.81   18.37
   3  -9  10  528.93   19.79
  10   3  -9  491.56   17.75
  -9 -10  -3  514.13   15.78
  10   3  -9  516.60   18.13
  -3   9  10  504.65   19.54
  10   4   0  588.68   17.36
   0  10   4  559.71   20.18
 -10   4   0  585.68   20.38
   0  10   4  578.97   20.78
   0 -10  -4  585.38   20.79
  10   4   0  551.08   16.36
   0 -10   4  590.67   21.53
  10  -4   0  496.93   14.41
  -4   0 -10  588.09   20.60
  10  -4   0  598.19   20.67
  -4   0 -10  564.27   19.92
   4   0 -10  640.07   22.15
   0  10  -4  609.98   21.34
   4  -1 -10    1.36    0.32
 -10   4  -1    1.02    0.34
  -4   1 -10    1.63    0.26
  10  -4  -1    2.91    0.24
   1 -10  -4    1.12    0.49
  -4   1 -10    1.05    0.40
   1  10   4    2.27    0.27
  -1 -10   4    1.67    0.57
   4  -1 -10    1.76    0.34
  -1  10  -4    1.44    0.36
 -10   4   1    1.24    0.23
  -1  10   4    2.93    0.30
  -4  -1 -10    1.68    0.26
  10   4  -1    1.39    0.13
  -4  -1 -10    1.73    0.30
   1 -10   4    1.38    0.61
  10  -4   1    1.19    0.36
  10   4  -1    1.95    0.15
   1  10  -4    1.77    0.54
  -1 -10  -4    1.56    0.26
  -4   2 -10  691.33   24.97
  10  -4  -2  657.98   21.72
 -10   4  -2  649.70   23.58
   4   2  10  693.24   24.97
  10  -4  -2  656.03   23.44
   2  10   4  673.14   24.20
   4  -2 -10  700.90   26.25
   4  -2 -10  733.83   27.33
  -2  10  -4  669.10   24.73
  -4   2 -10  654.92   23.59
   2 -10  -4  686.46   24.90
  -2 -10   4  696.23   26.31
  10  -4   2  692.13   24.28
  -4  -2 -10  686.15   24.89
  10   4  -2  653.54   22.16
   2  10  -4  677.95   25.66
  -2  10   4  681.23   24.94
  -4  -2 -10  670.09   24.33
 -10   4   2  649.37   23.88
   4   2 -10  674.46   25.78
  -2 -10  -4  653.77   23.43
  -2  10   4  687.51   25.45
  10   4  -2  645.27   22.06
   2 -10   4  638.04   23.52
   4   3  10  165.19    5.25
 -10   4  -3  165.23    4.72
  10  -4  -3  171.44    4.28
  -4   3 -10  167.09    4.82
   4  -3 -10  183.05    5.21
  -4   3 -10  167.51    4.72
  10  -4  -3  164.32    4.96
   3 -10  -4  165.36    5.52
   4  -3 -10  175.27    5.65
   3  10   4  177.52    4.76
  -3  10  -4  175.74    5.85
  -3 -10   4  176.21    5.07
   3 -10   4  168.08    5.01
  10   4  -3  178.38    4.56
  -3  10   4  168.38    5.54
  -3  10   4  173.48    5.22
 -10   4   3  172.59    4.72
   4   3 -10  179.10    5.32
   3  10  -4  181.30    5.70
  -4  -3 -10  172.95    4.57
  10  -4   3  177.20    5.01
  -3 -10  -4  167.68    4.51
  10   4  -3  171.98    4.52
   4 -10  -4   22.12    0.97
  10  -4  -4   22.95    0.56
  10  -4  -4   22.96    0.81
  -4   4 -10   21.41    0.85
   4   4  10   22.78    0.89
   4  -4 -10   24.45    0.96
  -4  10  -4   24.61    1.02
 -10   4  -4   21.43    0.89
   4  10   4   26.92    0.72
  -4 -10   4   23.40    0.92
  -4   4 -10   22.04    0.68
   4  -4 -10   24.71    0.98
  -4  10   4   24.12    1.03
   4   4 -10   22.17    1.49
  -4  10   4   22.94    0.97
 -10   4   4   23.46    0.79
  10   4  -4   23.61    0.64
  10  -4   4   22.29    0.71
  -4  -4 -10   23.20    0.69
  10   4  -4   24.39    0.78
  -4 -10  -4   22.99    0.68
   4  10  -4   29.55    1.30
   4 -10   4   21.18    1.00
  10  -4  -5   31.03    0.79
   4   5  10   31.03    1.14
   4  -5 -10   32.08    1.18
   5  10   4   36.50    1.08
  10  -4  -5   32.73    1.39
  -4   5 -10   31.81    1.57
  -5 -10   4   34.51    1.16
   4  -5 -10   36.13    1.72
   5 -10  -4   29.74    1.20
 -10   4  -5   32.83    1.17
  -4   5 -10   29.88    0.83
  -5  10  -4   32.35    1.27
  -5  10   4   30.03    1.18
   5 -10   4   31.64    1.27
   5  10  -4   30.25    1.03
   4   5 -10   31.40    1.27
  10   4  -5   30.93    0.82
  10   4  -5   30.40    0.90
  -4  -5 -10   32.22    0.86
  -5  10   4   32.59    0.94
  10  -4   5   31.74    0.91
  -5 -10  -4   32.12    1.04
  -6  10  -4   26.81    1.66
   4   6  10   25.49    1.57
   4  -6 -10   34.85    1.68
  -4   6 -10   25.65    0.98
  -4   6 -10   26.19    1.09
   4  -6 -10   25.54    1.63
   6 -10  -4   23.84    1.13
   6  10   4   26.00    0.84
  10   4   6   27.10    1.17
  10  -4  -6   23.08    0.92
  -6 -10   4   25.61    0.99
  10  -4  -6   24.74    0.98
 -10   4  -6   25.74    1.09
   6  10  -4   26.10    1.25
  -6  10   4   27.60    1.04
  -4  -6 -10   25.54    0.79
   4   6 -10   26.11    1.20
   4  -6  10   24.30    1.18
  -6  10   4   25.42    1.61
   6 -10   4   25.15    1.67
  -6 -10  -4   28.02    0.72
  10   4  -6   24.02    1.18
   7  10   4   33.53    0.76
  10  -4  -7   30.43    1.61
  -7  10  -4   33.49    1.93
  10   4   7   32.91    1.40
   4  -7 -10   34.40    1.34
  -4   7 -10   30.77    1.88
   4  -7 -10   30.43    1.84
   7 -10  -4   30.92    1.36
   4   7  10   30.43    1.30
  10  -4  -7   33.70    1.27
 -10   4  -7   31.88    0.97
  -4  -7 -10   35.43    1.25
   7  10  -4   33.27    1.08
   4  -7  10   31.25    2.18
   4   7 -10   31.54    1.96
  -7  10   4   33.36    1.90
  10  -4   7   32.97    1.42
  10   4  -7   33.72    1.54
   7 -10   4   29.80    1.32
  -7  10   4   31.10    1.09
  -7 -10  -4   34.97    0.98
  -4   8 -10   89.64    2.87
   8  10   4   83.53    1.90
   4   8  10   81.76    2.72
 -10   4  -8   81.00    2.63
  10  -4  -8   82.75    2.73
  10   4   8   80.54    2.30
   4  -8 -10   82.63    3.46
  10  -4  -8   80.59    2.53
   8 -10  -4   81.16    3.49
  -8  10  -4   81.24    3.47
  10  -4   8   82.01    2.81
   8 -10   4   76.94    2.64
  10   4  -8   82.62    3.05
  -8 -10  -4   83.50    1.95
  -8  10   4   81.37    3.44
   4   8 -10   78.24    3.46
   8  10  -4   81.19    2.26
   4  -8  10   85.37    3.05
  -4  -8 -10   78.32    2.47
  10  -4  -9    1.95    0.65
   4   9  10    0.80    0.48
  10   4   9    0.58    0.49
   4  -9 -10    1.17    0.45
 -10   4  -9    0.87    0.29
  10  -4  -9    1.22    0.32
  -9  10  -4    1.64    0.71
   9 -10  -4    2.36    0.48
  -4   9 -10    2.68    0.48
   9  10  -4    0.52    0.26
  -4  -9 -10    1.93    0.41
  10   4  -9    0.52    0.63
   4   9 -10    0.36    0.47
 -10  -4  -9    1.36    0.09
   9 -10   4    0.55    0.46
  10  -4   9    1.59    0.31
  -9  10   4    0.87    0.72
   0 -10  -5  126.70    3.94
  -5   0 -10  122.75    3.28
   0 -10   5  125.63    4.36
  10   5   0  137.37    2.59
   0  10   5  126.13    3.47
   0  10   5  132.42    3.67
  -5   0 -10  121.76    3.19
   0  10  -5  125.48    3.68
 -10   5   0  128.81    3.76
  10  -5   0  124.85    3.32
  10   5   0  121.17    2.31
  -1 -10   5    2.20    0.64
 -10   5  -1    2.61    0.41
   5  -1 -10    3.41    0.39
  10  -5  -1    2.61    0.47
  -5   1 -10    1.97    0.27
   1  10   5    2.03    0.30
   5  -1 -10    2.32    0.56
   1 -10  -5    2.00    0.35
  -5   1 -10    2.29    0.43
   1  10   5    2.44    0.37
 -10   5   1    2.18    0.28
  -5  -1 -10    1.80    0.41
  -1  10   5    2.37    0.55
   1 -10   5    2.39    0.42
  10  -5   1    3.25    0.45
  -5  -1 -10    1.79    0.50
  -1 -10  -5    2.21    0.30
   1  10  -5    2.68    0.40
  10   5  -1    2.19    0.14
  -1  10   5    2.17    0.53
   2 -10  -5  189.52    5.55
  10  -5  -2  191.67    5.41
   2  10   5  202.89    5.63
  10  -5  -2  198.30    4.69
  -5   2 -10  197.52    5.75
 -10   5  -2  197.17    5.46
   5  -2 -10  212.81    6.14
  -5   2 -10  198.37    5.97
   2  10   5  206.90    6.65
  -2 -10   5  191.57    6.49
  -2  10  -5  202.39    6.07
   5   2  10  198.33    5.60
   5  -2 -10  193.09    6.18
  10   5  -2  196.92    4.91
  -2  10   5  195.09    5.61
  10  -5   2  202.58    5.58
  -2  10   5  190.50    5.61
   2  10  -5  195.44    6.41
   2 -10   5  195.02    6.58
  -5  -2 -10  196.33    5.31
  -2 -10  -5  197.45    5.90
  10   5  -2  202.11    5.10
   5   2 -10  200.98    6.02
 -10   5   2  201.39    5.66
  -5   3 -10    1.46    0.38
  10  -5  -3    2.99    0.50
   5  -3 -10    1.62    0.61
   3 -10  -5    0.99    0.59
  -3  10  -5    1.74    0.44
  -5   3 -10    1.09    0.29
 -10   5  -3    3.93    0.41
   5   3  10    1.29    0.32
  10  -5  -3    1.29    0.19
   5  -3 -10    1.41    0.37
  -3 -10   5    0.73    0.38
   3  10   5    0.77    0.39
 -10   5   3    1.34    0.47
  -3  10   5    2.74    0.50
  -3 -10  -5    0.88    0.41
   3 -10   5    1.76    0.69
  10  -5   3    2.90    0.28
  10   5  -3    1.94    0.27
  -3  10   5    1.90    0.36
   3  10  -5    4.66    0.60
  -5  -3 -10    2.24    0.21
  -4 -10   5  998.39   41.96
  10  -5  -4  930.61   36.37
 -10   5  -4  934.62   37.58
  -4  10  -5  990.14   41.82
   4 -10  -5 1002.50   41.86
   4  10   5 1013.73   40.02
  -5   4 -10  995.88   41.07
   5  -4 -10  973.17   39.78
  -5   4 -10  953.68   38.26
   5  -4 -10 1022.17   41.42
   5   4  10  971.87   39.28
  10  -5  -4  935.59   38.68
  -4  10   5  970.28   40.76
  10   5  -4  946.68   37.01
   5   4 -10  931.89   39.59
   4 -10   5  954.52   40.40
  -4  10   5 1002.90   40.49
 -10   5   4  997.99   41.06
   4  10  -5  940.06   38.40
  10  -5   4 1005.99   40.89
  -5  -4 -10 1005.04   39.91
  -4 -10  -5  982.39   39.32
  -5  10  -5   30.10    1.88
  -5   5 -10   32.48    0.89
   5   5  10   33.68    1.20
   5  10   5   33.61    0.86
  10  -5  -5   31.63    1.14
   5  -5 -10   33.67    1.30
  -5   5 -10   32.42    1.17
  -5 -10   5   34.16    1.76
   5 -10  -5   33.09    1.86
   5  -5 -10   35.05    1.29
  10  -5  -5   32.11    1.00
   5  10  -5   34.62    1.18
 -10   5   5   33.47    1.50
   5  -5  10   32.71    1.30
  -5  10   5   34.12    1.36
  -5  -5 -10   32.73    1.07
   5 -10   5   31.60    1.90
  10   5  -5   33.42    1.23
  -5  10   5   32.52    1.31
   5   5 -10   32.65    1.34
  10  -5   5   33.36    1.39
  -5 -10  -5   33.17    1.08
  -6  10  -5   16.70    1.52
   5  -6 -10   17.55    1.37
   6 -10  -5   17.26    1.53
   5  -6 -10   16.90    0.95
  10  -5  -6   16.82    1.22
   5   6  10   17.28    0.90
  -5   6 -10   16.97    1.34
  -5   6 -10   19.58    0.83
   6  10   5   17.07    0.65
  -6 -10   5   22.22    1.29
 -10   5  -6   17.02    0.99
  10   5   6   17.35    1.07
  10  -5  -6   17.42    0.79
   5   6 -10   17.43    0.95
  -6  10   5   18.09    0.92
  -5  -6 -10   16.16    0.55
   6 -10   5   16.50    0.97
   5  -6  10   19.15    1.52
   6  10  -5   17.36    1.11
  10   5  -6   17.54    0.99
  10  -5   6   17.59    0.74
  -6  10   5   16.21    0.92
  -6 -10  -5   17.65    0.71
  10  -5  -7  152.16    4.51
  10   5   7  156.92    4.49
 -10   5  -7  159.99    4.96
  -5   7 -10  149.11    3.89
   5  -7 -10  165.63    4.89
  -5   7 -10  144.63    4.53
   5  -7 -10  155.56    4.87
  -7  10  -5  149.78    4.77
  10  -5  -7  148.78    4.49
   5   7  10  150.82    4.70
   7  10   5  154.19    3.91
   7 -10  -5  142.09    4.54
  -7  10   5  152.79    5.57
  -5  -7 -10  155.23    4.40
  -7 -10  -5  152.42    3.98
  10  -5   7  155.83    4.46
   7  10  -5  144.16    4.82
   5   7 -10  148.04    5.53
   5  -7  10  144.29    5.79
  10   5  -7  146.73    4.78
   7 -10   5  152.49    5.68
  10  -5  -8  450.58   15.72
   5  -8 -10  451.32   16.00
  -5   8 -10  441.28   15.69
  10  -5  -8  454.03   16.76
   5  -8 -10  494.03   16.98
   8 -10  -5  435.68   16.72
  -5   8 -10  444.45   14.96
   5   8  10  450.74   15.91
  -8  10  -5  447.17   16.98
 -10   5  -8  440.89   15.02
  10   5   8  430.97   15.71
  -5  -8 -10  463.66   15.60
  10  -5   8  478.95   16.25
  -8  10   5  469.88   17.72
   8 -10   5  461.92   16.25
   8  10  -5  450.13   15.40
  -8 -10  -5  455.15   14.03
  10   5  -8  470.34   16.82
   5   8 -10  460.98   17.37
   5  -8  10  445.19   17.57
  -9  10  -5  356.12   13.32
  10   5   9  351.07   12.36
  10  -5  -9  354.55   12.17
  10  -5  -9  342.37   11.66
   5   9  10  363.54   12.43
 -10   5  -9  351.34   11.54
  -5   9 -10  345.44   12.03
   9 -10  -5  352.67   12.12
   5  -9 -10  358.10   13.39
  10  -5   9  359.48   12.68
  -9 -10  -5  366.08    9.80
   9  10  -5  354.74   11.50
   9 -10   5  359.18   12.24
   5   9 -10  359.92   13.33
   5  -9  10  350.00   13.80
  -5  -9 -10  374.97   12.03
  -9  10   5  355.25   13.23
  10   5  -9  365.32   12.18
  10  -6   0  436.69   14.08
  -6   0 -10  423.72   13.29
   0  10   6  424.35   13.89
   0  10  -6  433.60   14.52
   0 -10   6  427.98   14.40
   0 -10  -6  427.41   13.87
   0  10   6  409.08   13.58
  10   6   0  418.20   11.25
 -10   6   0  437.70   14.14
  10   6   0  375.09   10.17
   6   0 -10  428.44   14.02
  -1  10  -6  971.76   40.24
   1  10   6  882.09   35.52
  10  -6  -1  932.62   37.63
  -6   1 -10  887.62   34.79
   1 -10  -6  900.12   35.99
   6  -1 -10  907.83   36.29
  -1 -10   6  971.45   40.44
 -10   6  -1  942.83   38.05
   6  -1 -10 1004.76   40.10
  -6   1 -10  918.45   35.98
   1  10   6  918.04   37.32
  -1 -10  -6  885.49   35.18
  -1  10   6  909.23   37.42
  -6  -1 -10  912.47   35.96
 -10   6   1  911.99   36.30
   1  10  -6  954.46   39.44
  10  -6   1  937.41   37.71
   1 -10   6  906.17   36.77
  10   6  -1  882.40   32.82
  -1  10   6  982.07   39.84
  10   6  -1  932.74   33.97
   6   2  10   39.73    1.19
  -2  10  -6   41.49    1.50
   2  10   6   42.08    1.22
 -10   6  -2   39.95    1.20
   2 -10  -6   39.56    1.80
   6  -2 -10   45.15    1.44
  -6   2 -10   40.14    1.48
   6  -2 -10   39.46    1.35
   2  10   6   40.93    1.93
  -2 -10   6   39.10    2.06
  -6   2 -10   42.64    1.38
  10  -6  -2   38.05    1.23
   2 -10   6   38.56    1.49
  10  -6   2   40.72    1.61
  -2  10   6   41.18    1.81
  -6  -2 -10   41.63    1.32
  10   6  -2   37.71    0.98
  -2  10   6   50.37    1.86
  -2 -10  -6   41.82    1.50
   2  10  -6   40.17    1.93
 -10   6   2   40.03    1.63
  -3  10  -6 1445.80   67.66
  -6   3 -10 1318.00   58.66
  -3 -10   6 1456.57   66.99
   6  -3 -10 1564.24   71.93
 -10   6  -3 1459.16   66.02
   6  -3 -10 1370.30   62.53
   3  10   6 1466.63   66.58
  10  -6  -3 1381.87   59.46
   3 -10  -6 1460.79   67.78
  10  -6  -3 1423.59   65.45
  -6   3 -10 1465.43   67.18
   6   3  10 1393.07   63.05
   3  10   6 1427.79   65.18
  -6  -3 -10 1296.66   57.52
  -3  10   6 1511.25   69.91
   3 -10   6 1417.72   66.51
  10  -6   3 1402.37   63.44
  -3  10   6 1524.39   70.49
   3  10  -6 1458.53   67.97
   6   3 -10 1495.00   69.56
  10   6  -3 1407.42   61.30
  -6  -3 -10 1382.36   61.76
 -10   6   3 1515.23   69.40
  -3 -10  -6 1468.93   66.67
  -6   4 -10  182.41    5.15
  10  -6  -4  174.08    4.61
   6   4  10  181.80    5.32
  -4 -10   6  196.89    5.98
   4  10   6  178.71    5.52
   6  -4 -10  199.33    5.84
 -10   6  -4  177.59    5.63
   4  10   6  187.82    5.07
   6  -4 -10  181.50    5.46
  -4  10  -6  181.04    6.52
  10  -6  -4  175.84    5.22
  -6   4 -10  178.26    5.78
   4 -10  -6  190.25    6.53
  -4  10   6  179.43    5.49
  10  -6   4  179.51    5.20
  -4 -10  -6  181.54    5.28
 -10   6   4  176.87    5.85
   4 -10   6  182.86    6.57
   4  10  -6  182.19    6.17
  -4  10   6  193.17    6.10
  -6  -4 -10  186.57    5.11
   6   4 -10  185.89    5.71
  10   6  -4  180.22    5.10
  -6  -4 -10  179.56    5.12
   6   5  10  756.01   28.92
  10  -6  -5  707.81   26.26
  -5 -10   6  748.00   29.22
   6  -5 -10  797.75   30.47
  -5  10  -6  751.26   29.46
   5  10   6  801.28   29.71
   5  10   6  773.76   29.95
  -6   5 -10  795.54   29.40
  -6   5 -10  736.75   28.37
   5 -10  -6  784.62   31.52
   6  -5 -10  725.68   28.18
  10  -6  -5  757.62   29.92
 -10   6  -5  792.30   30.88
 -10   6   5  761.29   30.10
  10   6  -5  751.63   28.52
  10  -6   5  734.20   28.78
   6  -5  10  758.76   30.53
  -6  -5 -10  733.63   26.70
   5 -10   6  720.46   28.28
   6   5 -10  728.05   28.41
  -5  10   6  781.40   30.27
  -6  -5 -10  746.01   27.18
   5  10  -6  788.58   30.23
  -5 -10  -6  781.93   29.06
  -5  10   6  815.27   31.68
  -6   6 -10  279.96    8.94
  -6   6 -10  291.65    8.36
  10  -6  -6  286.48    9.09
   6  -6 -10  293.57   10.07
   6   6  10  292.48   10.08
   6 -10  -6  291.78   10.60
 -10   6  -6  273.92    8.58
  10  -6  -6  276.00    8.44
  -6  10  -6  278.19    9.19
   6  -6 -10  295.67    9.57
  10   6  -6  282.29    8.52
  -6  10   6  292.90    9.51
 -10   6   6  282.33    9.00
  10  -6   6  279.72    9.43
   6  -6  10  290.24   10.38
   6 -10   6  287.99    9.45
   6   6 -10  277.06   10.00
  -6  10   6  290.29   10.37
  -6  -6 -10  262.16    7.91
   6  10  -6  279.52    9.67
  -6 -10  -6  290.30    8.51
 -10   6  -7    1.33    0.58
  -6   7 -10    1.84    0.45
  10  -6  -7    1.49    0.71
  10  -6  -7    1.51    0.27
   6   7  10    1.64    0.48
   6  -7 -10    1.71    0.51
  -6   7 -10    1.91    0.36
   7 -10  -6    2.14    0.52
   6  -7 -10    1.54    0.45
  10  -6   7    1.78    0.63
   6   7 -10    1.52    0.49
   7 -10   6    2.01    0.86
  -7  10   6    1.98    0.80
   7  10  -6    1.85    0.39
  -7 -10  -6    1.79    0.28
  -6  -7 -10    2.67    0.33
   6  -7  10    2.91    0.55
  -6   8 -10 1010.05   40.11
   8 -10  -6  875.26   38.00
  10   6   8  908.76   37.06
  10  -6  -8  919.58   37.37
   6  -8 -10  918.04   39.64
  -8  10  -6  916.34   38.15
  -6   8 -10  901.79   37.42
 -10   6  -8  961.77   39.08
  10  -6  -8  846.19   35.01
   6   8  10  927.20   38.29
   6  -8 -10  903.03   38.20
   6   8 -10  916.50   37.90
  -8  10   6  917.65   38.19
   6  -8  10  897.80   39.49
  -8 -10  -6  952.96   35.91
  10   6  -8  911.42   37.06
  -6  -8 -10  968.96   38.01
   8 -10   6  875.67   38.15
  10  -6   8  966.35   39.37
   8  10  -6  901.09   37.85
   6  -9 -10   53.30    2.06
 -10   6  -9   55.11    1.74
   6   9  10   52.69    2.02
  10   6   9   54.46    2.32
  -9  10  -6   52.74    2.63
  -6   9 -10   58.52    1.46
  10  -6  -9   53.45    2.00
  -6   9 -10   52.66    1.99
   9 -10  -6   53.12    2.03
  10  -6  -9   52.40    2.58
  -9  10   6   53.29    2.01
   6   9 -10   58.24    2.00
   6  -9  10   53.98    3.02
   9  10  -6   51.97    2.07
  10  -6   9   52.28    2.34
  -6  -9 -10   50.76    1.57
  -9 -10  -6   51.76    1.04
  10   6  -9   56.77    2.32
   9 -10   6   50.27    1.95
  10  -7   0 1347.23   61.88
   0 -10  -7 1396.89   63.89
   0  10   7 1403.32   63.47
  10   7   0 1381.48   55.99
   0  10  -7 1350.52   61.63
   7   0 -10 1348.38   60.73
   0  10   7 1466.95   66.65
  -7   0 -10 1389.51   60.89
 -10   7   0 1352.03   60.98
  10   7   0 1404.81   56.88
   0 -10   7 1337.09   63.23
  -1 -10   7   17.79    1.64
   1  10   7   20.01    1.08
   1  10   7   21.19    0.97
 -10   7  -1   19.56    1.15
   7  -1 -10   18.39    0.87
  -1  10  -7   18.16    1.50
  10  -7  -1   17.95    0.84
   1 -10  -7   19.09    0.85
   7  -1 -10   20.79    0.93
  -7   1 -10   18.03    0.64
   7   1  10   18.29    0.68
  10  -7   1   17.67    0.81
  -7  -1 -10   18.10    0.77
   1  10  -7   19.23    0.98
  10   7  -1   18.82    0.50
 -10   7   1   18.98    0.81
  -1  10   7   19.06    0.83
  -1  10   7   19.95    0.91
   1 -10   7   17.94    1.09
   7   2  10    8.44    0.48
   2 -10  -7    8.61    0.96
 -10   7  -2    8.34    0.83
   2  10   7    8.16    0.72
  -2 -10   7    7.98    0.76
  10  -7  -2    7.16    0.91
  -2  10  -7    7.54    0.73
  -7   2 -10    8.83    0.69
   7  -2 -10    9.47    0.63
  -7   2 -10    7.86    0.40
   2  10   7    9.21    1.06
   7  -2 -10    8.72    0.97
  -2  10   7    7.72    0.94
   2 -10   7    7.57    0.76
 -10   7   2    7.79    0.56
  -7  -2 -10    7.81    0.51
   2  10  -7    8.24    1.09
  -2 -10  -7    8.93    0.73
  10   7  -2    7.82    0.41
  10  -7   2    7.27    0.55
  -2  10   7    7.34    0.60
   7   3  10  154.87    4.43
  -3  10  -7  159.63    5.79
  10  -7  -3  159.06    5.33
   3  10   7  157.62    4.90
   3 -10  -7  161.50    5.59
   7  -3 -10  153.91    5.39
   7  -3 -10  172.20    5.69
  -3 -10   7  166.07    6.19
 -10   7  -3  162.12    5.25
  -7   3 -10  161.36    4.55
  -7   3 -10  162.40    5.02
   3  10   7  167.17    4.93
  -3  10   7  158.03    4.80
  -3  10   7  162.72    4.80
   7   3 -10  160.55    4.94
  -7  -3 -10  164.62    4.36
   3 -10   7  148.84    5.77
   3  10  -7  163.14    5.74
  10  -7   3  149.41    4.45
  -7  -3 -10  160.31    4.08
  10   7  -3  156.46    4.25
  -3 -10  -7  157.93    4.78
 -10   7   3  168.14    4.92
  10  -7  -4 1248.72   55.70
   4  10   7 1423.99   62.28
 -10   7  -4 1277.51   58.15
   7  -4 -10 1357.95   60.35
   7  -4 -10 1269.03   57.99
   4  10   7 1321.94   59.14
  -7   4 -10 1241.53   54.00
  -4  10  -7 1270.84   58.92
   7   4  10 1269.13   56.23
  -4 -10   7 1290.10   60.19
  -7   4 -10 1331.79   58.93
   4 -10  -7 1339.34   61.22
   7   4 -10 1278.83   58.91
  -4 -10  -7 1300.74   57.23
  -7  -4 -10 1338.73   57.43
   4  10  -7 1274.31   58.74
  -4  10   7 1338.54   61.10
  10  -7   4 1240.18   55.20
  10   7  -4 1301.45   56.71
 -10   7   4 1276.78   56.96
   4 -10   7 1280.48   59.52
  -4  10   7 1313.05   58.83
  -7  -4 -10 1222.16   52.72
  -5  10  -7   98.29    3.22
  -7   5 -10  103.74    3.00
   7   5  10   98.65    2.94
   5 -10  -7  101.71    4.02
   7  -5 -10  102.85    3.67
  10  -7  -5   97.65    2.59
  -7   5 -10   94.01    2.56
   5  10   7  106.99    3.36
   7  -5 -10   99.95    3.17
 -10   7  -5  104.42    3.03
  10  -7  -5   95.26    3.64
  -7  -5 -10   97.81    2.33
   7   5 -10   95.43    3.11
  10  -7   5   95.39    3.49
   5 -10   7   98.89    3.30
  10   7  -5   99.09    2.98
 -10   7   5   98.50    3.66
   5  10  -7  101.32    3.10
   7  -5  10   96.67    3.03
  -5  10   7  104.18    2.99
  -5 -10  -7  101.06    2.86
  -7  -5 -10   97.19    2.63
  -5  10   7  100.85    3.20
   6  10   7   74.76    2.60
   7   6  10   71.10    2.96
   6 -10  -7   73.92    2.55
  10  -7  -6   69.95    2.06
  -7   6 -10   75.87    2.92
   7  -6 -10   70.18    2.38
   7  -6 -10   79.96    2.42
  10  -7  -6   70.65    3.00
  -6  10  -7   72.69    2.54
  -7   6 -10   66.80    1.87
 -10   7  -6   74.35    2.82
  -6  10   7   73.60    3.24
  10  -7   6   76.12    2.89
 -10   7   6   75.65    3.01
   6 -10   7   72.01    2.60
   7  -6  10   76.67    2.56
   7   6 -10   74.60    2.48
   6  10  -7   74.39    2.87
  -7  -6 -10   73.59    1.99
  -7  -6 -10   70.33    1.65
  -6 -10  -7   78.98    2.12
  10   7  -6   73.20    2.44
   7  -7 -10  149.68    5.17
 -10   7  -7  146.73    4.42
  10  -7  -7  141.54    4.22
  -7  10  -7  143.34    4.65
  -7   7 -10  143.94    3.60
  10  -7  -7  138.30    5.24
   7  -7 -10  145.42    5.51
  -7   7 -10  155.63    5.49
   7  10   7  150.49    5.80
  10   7   7  152.34    4.62
  -7  10  -7  147.33    3.54
   7 -10  -7  139.19    4.58
   7   7  10  148.37    5.38
  -7  -7 -10  152.74    3.98
   7   7 -10  142.09    5.29
  10   7  -7  146.57    4.22
   7 -10   7  141.52    4.68
  -7  10   7  147.55    4.74
   7  10  -7  139.96    4.28
  10  -7   7  144.83    4.40
  -7 -10  -7  147.30    3.83
   7  -7  10  154.81    5.88
  10  -7  -8  299.33   10.05
  -8  10  -7  296.47    7.68
 -10   7  -8  312.08   10.20
  -8  10  -7  311.12   10.50
   8 -10  -7  321.33   11.92
   7   8  10  310.09   11.42
  -7   8 -10  310.28   11.36
  10   7   8  304.81   10.05
   8  10   7  309.43   10.50
   7  -8 -10  308.46   10.37
  10  -7  -8  296.34    9.73
   7  -8 -10  313.52   10.95
  -7   8 -10  316.74    9.39
  -8  10   7  311.96   10.56
   8 -10   7  314.76   11.72
  10   7  -8  306.77    9.86
  -8 -10  -7  321.73    9.14
  10  -7   8  313.86   11.27
   7   8 -10  306.40   11.19
   7  -8  10  312.27   11.84
  -7  -8 -10  287.93    8.66
   8  10  -7  290.80    9.51
   9 -10  -7   92.38    3.99
  10  -7  -9   93.95    3.11
  -7   9 -10   98.77    2.51
   7   9  10   98.85    4.09
   9  10   7   91.66    3.13
  10  -7  -9   93.30    3.03
   7  -9 -10  100.51    4.18
  10   7   9   92.07    2.92
 -10   7  -9   92.42    2.84
  -7   9 -10   91.44    3.06
  -9  10  -7   94.16    3.95
   9 -10   7   92.70    3.95
   7   9 -10   90.27    3.64
   7  -9  10   88.50    3.19
   9  10  -7   88.82    2.69
  10   7  -9   89.86    3.34
  -9  10   7   90.91    3.92
  10  -7   9   93.98    3.02
  -7  -9 -10   89.54    2.18
   0  10   8   12.89    0.60
  10   8   0    8.30    0.27
   8   0 -10    8.10    0.61
   0  10  -8   11.01    1.25
   0 -10  -8    8.48    0.90
  -8   0 -10    8.50    0.57
  10  -8   0    8.51    0.99
   0  10   8    8.78    1.07
   0 -10   8    9.72    1.39
 -10   8   0    8.45    0.61
   1 -10  -8   40.55    1.43
   1  10   8   41.01    1.59
  -1  10  -8   40.37    1.69
  -8   1 -10   40.12    1.10
  -1 -10   8   40.41    1.84
   1  10   8   41.91    1.34
   8  -1 -10   45.22    2.13
   8   1  10   40.75    1.52
   8  -1 -10   41.37    1.96
  10  -8  -1   39.60    2.03
 -10   8  -1   40.62    1.42
  -1  10   8   43.35    2.16
  -1 -10  -8   42.29    1.82
   8   1 -10   41.67    1.90
  -8  -1 -10   41.45    1.27
 -10   8   1   41.44    1.45
  10  -8   1   41.68    1.49
   1  10  -8   45.65    1.73
   1 -10   8   42.55    1.82
  10   8  -1   42.02    1.03
  -1  10   8   41.59    1.90
   2  10   8 2318.35  127.81
   2 -10  -8 2323.83  127.70
  -2 -10   8 2371.77  129.59
  -2  10  -8 2433.83  133.84
   8  -2 -10 2360.08  128.92
   8  -2 -10 2519.13  135.72
   2  10   8 2406.73  129.28
   8   2  10 2356.72  126.04
  10  -8  -2 2429.97  132.39
 -10   8  -2 2455.59  134.00
  -8   2 -10 2299.53  124.75
 -10   8   2 2387.77  128.82
  -8  -2 -10 2486.02  130.21
  -2  10   8 2396.98  129.84
  -2 -10  -8 2289.51  124.70
   2 -10   8 2287.51  127.58
   2  10  -8 2353.76  128.00
  -2  10   8 2433.94  131.18
  10  -8   2 2387.88  130.22
  10   8  -2 2515.08  131.82
  -8   3 -10   31.18    1.01
  -3  10  -8   30.04    1.42
   3 -10  -8   29.88    1.84
  -3 -10   8   28.23    1.44
 -10   8  -3   39.20    1.72
   8   3  10   27.59    1.41
   3  10   8   31.71    1.38
  10  -8  -3   29.69    1.81
   8  -3 -10   31.47    1.22
   8  -3 -10   29.23    1.25
  -3  10   8   29.62    1.25
  10  -8   3   30.48    1.21
   3  10  -8   31.71    1.36
  10   8  -3   30.94    1.04
  -8  -3 -10   28.06    0.83
  -8  -3 -10   31.07    0.93
   3 -10   8   28.97    2.22
 -10   8   3   29.27    1.19
  -3  10   8   31.71    1.24
   8   3 -10   30.35    1.31
  -3 -10  -8   28.89    0.97
  10  -8  -4   98.15    3.08
   4 -10  -8  100.07    3.97
   8  -4 -10  113.49    3.85
 -10   8  -4  100.08    3.04
  -4  10  -8  105.49    3.43
   4  10   8  100.14    3.31
   8   4  10  103.24    3.49
   8  -4 -10   98.30    3.14
  -8   4 -10   98.96    2.83
  10   8  -4  105.52    3.00
   4 -10   8  100.63    4.44
  -4 -10  -8   98.12    3.01
  10  -8   4   97.55    3.66
 -10   8   4  106.10    3.83
  -4  10   8  105.21    3.30
   4  10  -8   98.34    3.15
   8   4 -10   99.88    3.20
  -8  -4 -10  105.03    2.63
  -4  10   8  104.33    3.14
  -8  -4 -10   98.31    2.47
  -8   5 -10    4.45    0.38
 -10   8  -5    4.44    0.82
   8   5  10    5.25    0.82
  -5  10  -8    5.14    1.05
   8  -5 -10    4.62    0.99
   8  -5 -10    5.07    0.51
   5  10   8    5.09    0.69
   5 -10  -8    4.49    0.65
  -8   5 -10    4.18    0.47
  10  -8  -5    4.37    0.94
  -5 -10  -8    4.20    0.31
   8   5 -10    5.43    0.95
  -8  -5 -10    4.39    0.35
   5  10  -8    5.49    0.94
  10   8  -5    6.04    0.58
 -10   8   5    5.38    0.90
  -8  -5 -10    4.79    0.31
  10  -8   5    4.23    0.88
  -5  10   8    6.29    0.61
   5 -10   8    4.68    0.72
  -5  10   8    4.46    0.78
   8  -5  10    3.88    0.54
  -8   6 -10  736.74   29.44
  -8   6 -10  689.90   25.04
   8  -6 -10  720.80   28.10
  10  -8  -6  702.95   28.69
   6  10   8  714.95   28.10
   8   6  10  721.79   27.83
   6 -10  -8  708.31   27.84
  -6  10  -8  741.69   30.52
   8  -6 -10  744.07   29.45
 -10   8  -6  770.00   29.65
 -10   8   6  751.42   29.19
   8   6 -10  707.04   27.49
  10   8  -6  701.01   27.22
  10  -8   6  739.57   28.54
  -8  -6 -10  741.57   26.40
   6  10  -8  743.61   28.70
  -6  10   8  732.11   29.96
   6 -10   8  696.68   27.65
   8  -6  10  716.35   28.10
  -8  -6 -10  729.40   25.92
  -6 -10  -8  740.51   27.24
  10   8   7   28.07    1.82
  -7  10  -8   27.57    0.73
   8   7  10   28.69    1.25
  10  -8  -7   27.41    0.82
   7 -10  -8   27.61    2.06
 -10   8  -7   28.94    1.18
  -7  10  -8   29.16    1.98
  -8   7 -10   29.47    1.20
   8  -7 -10   28.70    1.56
  10  -8  -7   26.66    1.26
   7  10   8   29.61    2.05
  -8   7 -10   26.34    0.76
   8  -7 -10   25.32    1.95
   8  -7  10   26.60    1.90
  -8  -7 -10   29.49    0.79
  -8  -7 -10   29.02    0.85
   7  10  -8   28.44    1.68
  -7 -10  -8   26.71    0.86
 -10   8   7   27.06    1.83
  -7  10   8   28.00    1.35
   8   7 -10   27.16    1.22
   7 -10   8   25.93    1.39
  10   8  -7   29.72    1.42
  10  -8   7   27.38    1.78
  -8   8 -10  263.50    7.62
  10  -8  -8  274.23   10.32
   8  10   8  299.46   10.08
  10  -8  -8  262.86    8.06
   8 -10  -8  280.61    9.50
   8  -8 -10  272.88    9.27
  -8   8 -10  295.14   10.52
 -10   8  -8  302.97    9.84
  -8  10  -8  274.86    7.22
  10   8   8  299.26   10.78
   8   8  10  285.35    9.52
  -8  10  -8  293.55   10.86
   8  -8 -10  289.17    9.20
   8   8 -10  272.19    9.06
  -8  -8 -10  300.59    8.52
   8  10  -8  275.25    9.81
  -8  10   8  289.38   10.77
   8  -8  10  294.67    9.93
  -8 -10  -8  293.63    8.29
  -8  -8 -10  277.14    8.00
  10   8  -8  287.73    9.84
   8 -10   8  291.22   10.95
  10  -8   8  289.43   10.44
  10   8   9   58.33    2.60
  10  -8  -9   52.86    1.56
 -10   8  -9   58.18    2.44
   9 -10  -8   51.40    2.06
   9  10   8   54.29    2.12
   8  -9 -10   52.78    2.74
   8   9  10   53.61    2.03
  10  -8  -9   57.27    2.11
  -9  10  -8   57.81    2.74
  -8   9 -10   45.41    1.18
  -8   9 -10   53.31    2.00
  -8  -9 -10   52.93    1.35
  10   8  -9   52.69    2.22
  -9  10   8   52.92    2.05
   9 -10   8   54.81    2.84
   8  -9  10   50.83    2.06
  10  -8   9   51.16    1.92
   9  10  -8   50.30    2.17
   8   9 -10   53.52    2.50
   0 -10   9 2891.15  167.67
   9   0 -10 2824.80  161.50
 -10   9   0 2865.70  167.11
   0  10   9 2771.89  159.50
  -9   0 -10 2899.16  161.83
   0  10  -9 2945.42  169.56
   0 -10  -9 2819.03  161.28
  10  -9   0 2865.05  166.26
  10   9   0 2720.38  147.19
  -9   1 -10 1170.21   49.85
   9   1  10 1087.04   46.27
 -10   9  -1 1129.30   49.42
   1  10   9 1147.30   51.92
  -1  10  -9 1238.11   55.88
  -1 -10   9 1194.66   55.01
  10   9   1 1066.03   40.95
   1 -10  -9 1122.56   50.34
   9  -1 -10 1199.71   53.13
  10  -9  -1 1115.93   50.36
  10  -9   1 1127.55   49.10
 -10   9   1 1143.05   51.30
  -1  10   9 1139.90   50.01
   1 -10   9 1103.21   51.60
  -9  -1 -10 1158.38   47.56
   9   1 -10 1140.37   50.78
  -1 -10  -9 1211.00   53.02
  10   9  -1 1093.28   44.41
   1  10  -9 1152.14   50.81
   9   2  10 1028.50   43.38
   2 -10  -9  996.67   42.39
  -2 -10   9 1009.75   43.70
  10  -9  -2 1028.34   43.39
  -9   2 -10 1013.72   42.38
   9  -2 -10 1076.05   46.59
 -10   9  -2 1073.27   46.62
   9  -2 -10  995.60   42.09
  -2  10  -9  973.07   41.79
   2  10   9 1033.48   43.95
  -2  10   9 1052.42   44.67
  -2  10   9 1020.62   43.20
 -10   9   2 1019.57   43.32
  -9  -2 -10 1067.95   41.89
  -2 -10  -9  986.66   42.15
   2  10  -9 1064.59   45.23
  10   9  -2 1043.36   41.53
   9   2 -10 1029.59   43.21
  10  -9   2 1033.99   43.61
   2 -10   9  976.92   44.30
  -3  10  -9   29.95    2.12
 -10   9  -3   30.40    1.79
  10  -9  -3   28.42    1.94
   9   3  10   30.18    1.05
   3 -10  -9   28.72    1.30
   9  -3 -10   30.78    1.69
  -9   3 -10   29.16    0.98
   9  -3 -10   31.24    1.82
   3  10   9   29.14    1.44
 -10   9   3   30.47    1.28
  -9  -3 -10   33.43    0.89
   9   3 -10   31.49    1.89
  10   9  -3   28.42    1.08
   3  10  -9   30.10    1.39
  -9  -3 -10   28.00    0.78
  -3  10   9   29.33    1.28
  10  -9   3   30.58    1.89
  -3  10   9   30.33    1.85
   3 -10   9   30.02    2.38
  -3 -10  -9   29.73    1.35
   4 -10  -9  442.49   15.81
   9   4  10  455.81   15.59
  10  -9  -4  429.98   15.32
 -10   9  -4  448.42   15.84
   4  10   9  460.32   17.67
   9  -4 -10  464.34   16.28
  -9   4 -10  459.24   16.35
   9  -4 -10  472.57   16.29
  -4  10  -9  481.80   17.13
  10  -9   4  434.65   15.39
  -9  -4 -10  460.00   14.23
   4 -10   9  435.82   17.62
  10   9  -4  449.17   15.29
 -10   9   4  457.18   17.25
  -4  10   9  469.73   16.50
  -9  -4 -10  443.89   13.79
   4  10  -9  471.12   16.64
  -4  10   9  463.44   16.38
  -4 -10  -9  478.50   16.33
   9   4 -10  436.68   15.56
   9   5  10  993.72   41.41
   9  -5 -10  921.13   38.97
  10  -9  -5  923.89   40.52
   9  -5 -10 1002.40   42.72
  -9   5 -10 1029.03   42.53
   5  10   9  966.38   42.71
  -5  10  -9 1010.47   42.82
   5 -10  -9  972.27   42.78
 -10   9  -5  997.41   42.18
   5  10  -9  957.24   42.00
   9   5 -10  996.49   43.11
  -5  10   9  993.71   42.09
  10  -9   5  988.31   41.42
  -9  -5 -10  979.90   37.75
  10   9  -5 1024.42   42.40
  -5 -10  -9 1025.06   41.71
  -9  -5 -10  956.57   37.14
   9  -5  10  988.36   42.58
   5 -10   9  945.09   42.63
 -10   9   5  977.34   42.61
  10  -9  -6    0.26    0.70
   6 -10  -9    0.85    0.47
 -10   9  -6    0.60    0.62
   6  10   9    1.04    0.47
   9  -6 -10    0.73    0.32
   9   6  10    0.38    0.57
  -9   6 -10    0.64    0.53
   9  -6 -10    0.62    0.42
  -6  10  -9    0.58    0.45
   6  10  -9    0.89    0.40
   9  -6  10    2.82    0.63
 -10   9   6    0.03    0.40
   6 -10   9    0.42    0.53
  10  -9   6    0.37    0.65
  10   9  -6    1.78    0.42
  -9  -6 -10    1.26    0.15
  -6  10   9    1.27    0.43
  -9  -6 -10    1.10    0.15
   9   6 -10    1.20    0.62
  -6 -10  -9    0.19    0.28
  -7  10  -9 1117.13   47.30
  -9   7 -10 1176.15   51.88
   7  10   9 1110.65   51.26
  10  -9  -7 1115.69   49.56
   9  -7 -10 1123.01   51.31
  10   9   7 1159.48   51.49
   7 -10  -9 1165.93   51.86
 -10   9  -7 1155.31   51.35
  -7  10  -9 1252.01   55.50
   9  -7 -10 1163.37   51.73
   9   7  10 1154.49   52.38
   9  -7  10 1146.84   51.15
  10  -9   7 1152.85   52.61
   9   7 -10 1124.48   49.66
 -10   9   7 1180.11   53.90
   7 -10   9 1189.13   55.07
  -7 -10  -9 1131.62   47.02
  -9  -7 -10 1080.91   43.85
  10   9  -7 1193.00   52.79
   7  10  -9 1187.50   53.70
  -9  -7 -10 1162.12   46.14
   8 -10  -9   70.97    2.67
   9   8  10   79.52    3.45
  10  -9  -8   73.43    3.49
  -9   8 -10   83.33    2.70
  -8  10  -9   80.98    2.81
   9  -8 -10   76.57    2.32
   8  10   9   75.99    2.76
  10   9   8   80.33    2.80
   9  -8 -10   75.17    2.73
 -10   9  -8   78.64    2.63
  10  -9   8   77.23    2.65
  -8 -10  -9   74.18    1.85
  10   9  -8   77.32    2.37
   8 -10   9   76.20    3.75
   8  10  -9   79.79    2.58
   9   8 -10   77.22    2.54
   9  -8  10   80.19    2.75
   9 -10  -9  184.60    7.42
  -9  10  -9  208.71    6.87
  10   9   9  190.73    6.40
   9   9  10  202.35    7.75
 -10   9  -9  203.01    7.49
   9  -9 -10  195.34    6.69
  -9   9 -10  205.09    7.56
  10  -9  -9  192.42    6.59
   9  10   9  190.82    7.52
   9  -9  10  188.24    6.42
  10  -9   9  209.10    6.88
   9   9 -10  199.12    6.41
  10   9  -9  190.87    6.08
   9 -10   9  193.27    6.65
   9  10  -9  204.09    6.51
   0 -10  10 1185.05   54.91
 -10   0 -10 1192.40   49.98
   0 -10 -10 1149.91   51.44
   0  10  10 1155.73   52.71
 -10  10   0 1167.27   52.78
  10   0 -10 1142.40   49.78
  10  10   0 1102.64   45.35
  10 -10   0 1092.52   48.23
   0  10 -10 1124.78   50.17
  -1 -10  10   81.34    3.20
  10   1  10   80.41    2.51
  10  10   1   80.87    1.75
  10  -1 -10   80.57    3.25
  -1  10 -10   91.63    4.07
 -10   1 -10   75.01    2.27
 -10  10  -1   77.21    2.66
  10 -10  -1   80.96    2.78
   1 -10 -10   80.80    2.65
   1  10  10   79.93    2.79
  -1 -10 -10   78.61    2.41
   1 -10  10   83.02    3.25
  10 -10   1   80.62    2.78
 -10  10   1   79.75    2.76
 -10  -1 -10   82.53    2.17
  10  10  -1   76.16    2.01
  10   1 -10   76.53    3.09
  -1  10  10   82.10    3.63
   1  10 -10   81.65    2.97
  10  -2 -10 1699.39   82.13
 -10  10  -2 1734.84   85.85
   2  10  10 1605.59   80.30
  -2  10 -10 1620.40   79.06
  10   2  10 1549.91   75.63
  10  -2 -10 1582.03   76.56
  10  10   2 1572.50   67.68
  10 -10  -2 1573.69   78.66
   2 -10 -10 1612.46   78.36
 -10   2 -10 1702.04   81.05
 -10  -2 -10 1677.82   76.05
  10  10  -2 1647.67   77.19
   2 -10  10 1658.12   81.64
  -2  10  10 1664.42   83.09
 -10  -2 -10 1525.87   70.40
 -10  10   2 1626.40   81.19
  -2 -10 -10 1634.90   79.78
  10 -10   2 1590.32   77.20
   2  10 -10 1574.17   77.08
  10   2 -10 1642.28   79.19
   3 -10 -10 1177.99   52.53
  10   3  10 1203.65   53.44
 -10   3 -10 1173.77   50.94
  10  -3 -10 1158.54   52.96
  -3  10 -10 1148.95   53.58
  10  -3 -10 1243.09   55.89
 -10  10  -3 1260.95   56.18
  10 -10  -3 1130.82   50.52
   3  10  10 1182.67   54.70
  10  10  -3 1200.94   51.82
 -10  10   3 1179.59   54.33
  -3  10  10 1259.09   57.70
   3  10 -10 1232.93   54.96
  10 -10   3 1197.40   53.21
 -10  -3 -10 1195.35   48.98
  10   3 -10 1185.84   52.27
   3 -10  10 1146.71   52.30
 -10  -3 -10 1160.33   47.34
  10   3 -10 1204.16   54.77
  -3 -10 -10 1159.74   50.64
 -10   4 -10  275.18    8.25
   4  10  10  254.03    8.48
  10 -10  -4  244.98    9.16
   4 -10 -10  259.17    8.54
  10   4  10  255.91    8.48
  10  -4 -10  253.33    9.07
 -10  10  -4  263.62    9.41
  -4  10 -10  251.76    8.49
  10  -4 -10  258.84    8.75
  10   4 -10  243.81    8.02
 -10  -4 -10  230.91    6.05
   4  10 -10  244.41    8.22
 -10  -4 -10  257.59    6.64
 -10  10   4  262.27    8.59
  10  10  -4  251.52    7.83
  10 -10   4  240.96    7.99
   4 -10  10  249.90    8.70
  -4 -10 -10  265.06    8.30
  10 -10  -5   43.65    2.43
   5  10  10   40.71    2.53
  10   5  10   41.20    1.41
  10  -5 -10   41.29    1.63
   5 -10 -10   42.07    1.78
 -10  10  -5   39.23    2.20
  10  -5 -10   39.74    1.37
 -10   5 -10   41.86    1.75
  -5  10 -10   40.29    1.71
  10   5 -10   44.09    2.14
  10  -5  10   41.11    1.45
 -10  -5 -10   41.56    0.82
   5 -10  10   40.98    2.75
 -10  10   5   42.18    2.30
  10 -10   5   41.99    1.65
   5  10 -10   52.13    2.50
  10  10  -5   43.25    1.61
  -5 -10 -10   42.32    1.45
 -10   6 -10  493.97   18.06
   6 -10 -10  473.14   18.40
  10  -6 -10  472.04   18.01
  10   6  10  473.84   17.50
 -10  10  -6  487.81   18.67
  10 -10  -6  442.48   16.10
  -6  10 -10  481.73   16.43
  10  -6 -10  457.90   16.72
  -6  10 -10  459.60   17.88
   6  10  10  488.77   18.81
  10  10  -6  458.89   15.94
 -10  10   6  473.81   17.19
  10   6 -10  464.63   17.37
   6 -10  10  444.19   16.63
   6  10 -10  492.43   17.63
  10  -6  10  454.72   16.33
  -6 -10 -10  441.97   15.04
  10 -10   6  456.28   17.62
   7 -10 -10   58.34    2.27
  10  -7 -10   58.66    2.86
   7  10  10   59.25    2.25
  -7  10 -10   55.96    1.50
  10  10   7   58.18    2.17
  -7  10 -10   57.88    2.93
  10  -7 -10   59.82    1.80
 -10  10  -7   62.86    2.79
  10   7  10   58.16    2.01
 -10   7 -10   61.96    2.46
  10 -10  -7   57.77    2.15
  10  -7  10   58.22    2.06
  10   7 -10   57.66    1.94
   7  10 -10   61.56    2.77
  10 -10   7   61.30    2.89
  10  10  -7   56.89    1.75
 -10  10   7   60.13    2.87
   7 -10  10   59.28    3.16
  -7 -10 -10   61.01    1.68
   8 -10 -10   64.33    3.18
 -10   8 -10   67.70    2.77
  10 -10  -8   71.90    3.31
  10  -8 -10   62.29    2.36
  10  10   8   69.00    3.23
 -10  10  -8   69.17    2.40
  10   8  10   65.03    2.33
  10  -8 -10   65.15    2.34
  -8  10 -10   65.69    3.08
   8  10  10   64.48    3.15
  10  -8  10   66.38    2.31
   8  10 -10   63.97    2.87
  10   8 -10   65.24    2.16
 -10  10   8   64.87    2.40
  10 -10   8   67.00    3.09
   8 -10  10   67.40    2.55
  10  10  -8   64.30    2.51
  10   9  10  271.99   10.59
  10 -10  -9  291.40   11.21
 -10  10  -9  307.01   11.39
  10  10   9  297.86   11.37
  10  -9 -10  275.71    9.69
  -9  10 -10  287.60    9.97
   9 -10 -10  274.88   10.75
   9  10  10  281.75    9.89
 -10   9 -10  301.99   10.24
  10 -10   9  285.90   10.02
  10  -9  10  275.33    9.62
  10   9 -10  296.63   10.62
  10  10  -9  306.47   10.77
   9  10 -10  283.60    9.61
   9 -10  10  303.01   10.53
  10  10  10 1220.09   56.55
 -10  10 -10 1275.98   58.92
  10 -10 -10 1131.28   52.70
  10  10 -10 1236.86   58.14
  10 -10  10 1289.66   59.54
   0   0 -11  435.13   15.04
   0  11   0  421.46   13.92
   0 -11   0  420.27   13.79
  11   0   0  433.30   13.04
   0   0 -11  429.52   13.96
  11   0   1  236.19    6.00
   0  -1 -11  231.83    6.78
  -1 -11   0  216.62    6.41
   0   1 -11  217.34    6.40
  11   0  -1  243.42    6.49
   1  11   0  227.75    6.72
   0   1 -11  227.19    7.53
   1 -11   0  217.25    7.15
  -1  11   0  230.50    7.51
   0  -2 -11   77.34    2.25
  11   0  -2   78.44    2.02
  -2  11   0   71.73    2.67
   2  11   0   76.41    2.52
   0   2 -11   76.67    2.58
   0   2 -11   77.01    2.26
  11   0   2   76.96    1.65
  -2 -11   0   74.10    2.05
   2 -11   0   76.29    2.77
 -11   0  -2   76.59    1.60
   0   3 -11   48.42    1.62
  -3  11   0   52.13    2.12
 -11   0  -3   49.98    1.00
   0   3 -11   49.74    1.44
  -3 -11   0   51.41    1.80
  11   0   3   49.04    1.02
   0  -3 -11   52.78    1.63
   3  11   0   47.16    1.36
   3 -11   0   48.39    2.11
  11   0  -3   48.88    1.17
   0  -3 -11   50.88    1.83
 -11   0  -4    1.48    0.13
  -4 -11   0    1.65    0.44
  11   0   4    2.18    0.15
   4 -11   0    2.82    0.66
  -4  11   0    1.21    0.39
   0  -4 -11    1.48    0.39
   4  11   0    1.26    0.26
   0  -4 -11    1.88    0.51
   0   4 -11    1.43    0.38
  11   0  -4    1.37    0.35
  -5 -11   0  254.90    7.37
   5 -11   0  248.20    7.79
  -5  11   0  246.30    7.11
   0  -5 -11  265.09    9.02
  11   0   5  263.84    7.14
   5  11   0  234.45    6.88
   0  -5 -11  244.79    7.41
 -11   0  -5  258.96    6.50
   0   5 -11  234.33    7.39
  11   0  -5  248.23    7.53
  -5  11   0  246.17    7.79
  -6  11   0  891.65   33.68
   0  -6 -11  855.73   33.69
  -6 -11   0  846.60   32.62
  -6  11   0  843.64   35.07
  11   0   6  807.60   30.45
   6  11   0  862.64   33.95
   0  -6 -11  906.40   35.98
   0   6  11  871.49   34.77
  11   0  -6  850.03   33.63
 -11   0  -6  798.64   29.35
   0   6 -11  831.41   33.19
   6 -11   0  863.70   35.80
  -7  11   0  619.02   21.13
  11   0  -7  607.12   22.61
   0   7 -11  580.37   23.01
  -7  11   0  599.25   22.54
   0   7  11  621.77   23.15
   7  11   0  629.19   21.94
  11   0   7  584.13   20.31
   0  -7 -11  606.81   23.21
   7 -11   0  617.78   24.37
  -7 -11   0  645.19   23.06
 -11   0  -7  640.82   21.13
  -8  11   0 1883.03   89.10
   0  -8 -11 1917.57   98.92
   8  11   0 1908.47   94.60
   0   8 -11 1823.88   93.10
 -11   0  -8 1910.79   92.55
   8 -11   0 2013.30  104.34
  -8 -11   0 1921.98   95.27
   0   8  11 1940.61   98.82
  -8  11   0 1990.28  103.41
  11   0   8 1966.14   97.11
  11   0  -8 1891.79   96.88
   0   9  11  338.88   11.58
   9  11   0  333.69   10.23
   9 -11   0  351.44   11.96
  11   0  -9  335.43   11.78
  -9  11   0  350.95   11.98
   0  -9 -11  345.58   11.35
  11   0   9  315.38    9.95
   0   9 -11  354.04   12.14
 -11   0  -9  331.69    9.90
  10  11   0 2180.42  109.14
   0  10 -11 2113.25  112.06
  10 -11   0 2100.39  110.76
 -11   0 -10 2208.67  112.29
   0  10  11 2010.40  106.86
   0 -10 -11 2017.97  106.50
 -10  11   0 2104.27  113.68
  11   0 -10 2058.45  108.24
  11   1   0  895.27   32.24
  -1   0 -11  856.98   34.07
   0 -11   1  904.53   35.91
  -1   0 -11  846.48   33.10
   0  11   1  871.36   34.95
   0 -11  -1  891.42   35.39
  11  -1   0  895.90   33.41
   1   0 -11  876.49   34.12
   0  11  -1  846.56   33.28
 -11   1   0  826.89   31.03
  -1 -11   1  187.92    5.82
   1  -1 -11  186.41    5.32
  11   1   1  199.03    4.63
  -1   1 -11  163.26    5.14
   1  11   1  177.51    5.06
   1 -11  -1  181.97    5.22
 -11   1  -1  182.31    4.59
  -1  11  -1  180.69    5.25
  11  -1  -1  177.10    4.78
  -1   1 -11  175.39    5.72
  -1  11   1  172.52    5.06
   1  11  -1  183.92    5.78
  11   1  -1  182.20    4.57
   1   1 -11  180.22    5.29
  11  -1   1  180.69    4.63
   1 -11   1  173.93    5.10
  -1 -11  -1  171.92    5.42
   1   1 -11  177.00    5.08
  -1  -1 -11  177.51    5.05
 -11   1  -2  284.64    7.70
   2  11   1  280.32    8.85
   2 -11  -1  274.53    8.42
  -2  11  -1  267.51    9.06
   1  -2 -11  292.96    8.85
  11   1   2  277.41    6.85
  -1   2 -11  265.61    8.90
  -2 -11   1  283.80    9.08
  -1   2 -11  272.11    8.63
  11  -1  -2  285.59    7.96
   1  -2 -11  280.92    8.49
  -2  11   1  281.68    8.68
   2 -11   1  287.61    9.52
  -2 -11  -1  281.89    8.92
   2  11  -1  281.01    9.01
   1   2 -11  259.48    8.17
   1   2 -11  277.19    9.03
  11   1  -2  271.21    7.66
  11  -1   2  288.27    7.88
  -1  -2 -11  278.34    8.45
  -3 -11   1  577.45   20.11
  -1   3 -11  568.95   20.10
 -11   1  -3  579.29   18.78
   1  -3 -11  591.64   21.43
  -3  11  -1  587.17   21.80
  11  -1  -3  605.29   20.73
   3 -11  -1  593.95   20.91
   3  11   1  630.57   22.21
   1  -3 -11  625.93   21.94
  11   1   3  479.45   14.09
  -1   3 -11  567.53   19.70
  -1  -3 -11  590.11   20.54
  -3 -11  -1  601.51   20.72
  11  -1   3  530.73   16.98
  -3  11   1  576.19   20.52
   3  11  -1  578.77   20.27
   1   3 -11  571.01   20.35
  11  -1   3  570.30   18.30
   3 -11   1  584.41   21.60
  11   1  -3  601.75   20.24
  -1  -3 -11  603.36   21.20
  -1   4 -11    5.14    0.50
   4 -11  -1    4.68    0.80
 -11   1  -4    4.65    0.25
  11  -1  -4    4.10    0.31
   4  11   1    6.22    0.52
  -4 -11   1    4.98    0.40
  -1   4 -11    4.30    0.60
   1  -4 -11    4.09    0.51
  -4  11  -1    3.67    0.53
   1  -4 -11    3.97    0.42
  11  -1   4    4.07    0.19
   1   4 -11    4.50    0.84
  -1  -4 -11    3.96    0.38
   4  11  -1    4.74    0.59
  -4  11   1    4.08    0.45
  11   1  -4    4.54    0.27
  -1  -4 -11    4.92    0.82
  -4  11   1    3.89    0.51
   4 -11   1    4.33    0.83
  -4 -11  -1    4.14    0.35
   5  11   1   20.67    0.67
   1  -5 -11   19.93    1.22
   1   5  11   21.80    0.97
  -5 -11   1   21.29    1.07
  11   1   5   21.59    0.74
 -11   1  -5   19.52    0.56
  -5  11  -1   20.29    0.97
   1  -5 -11   22.53    1.02
  11  -1  -5   21.61    0.96
   5 -11  -1   20.48    0.99
  -1   5 -11   22.31    1.43
   5 -11   1   19.56    0.99
  -1  -5 -11   20.51    0.80
  -5  11   1   22.71    0.83
   5  11  -1   20.97    1.03
 -11  -1  -5   19.54    0.30
  -5  11   1   21.67    0.97
  11   1  -5   19.12    0.86
  -5 -11  -1   22.15    0.98
  11  -1   5   21.69    0.55
  -1  -5 -11   23.29    1.54
   1   5 -11   24.91    1.50
  11  -1   5   21.36    0.62
  -6  11  -1  175.93    6.38
   1   6  11  181.35    5.59
 -11   1  -6  164.69    4.32
   1  -6 -11  188.32    6.70
   6 -11  -1  169.74    5.36
  -6 -11   1  188.55    5.25
   1  -6 -11  181.91    5.41
  11   1   6  178.76    4.93
  -1   6 -11  176.45    6.31
  -6  11  -1  185.26    4.86
  11  -1  -6  173.09    4.92
   6  11   1  172.76    5.08
  11  -1   6  180.27    4.50
   6 -11   1  175.06    6.33
  11  -1   6  189.19    4.88
  -6 -11  -1  184.49    5.36
  -6  11   1  179.11    6.38
  -6  11   1  195.97    5.30
 -11  -1  -6  181.38    3.90
  -1  -6 -11  184.84    5.84
   6  11  -1  171.33    5.25
  11   1  -6  168.26    5.19
   1   6 -11  176.04    6.34
 -11   1  -7  902.54   34.93
  -7  11  -1  922.66   34.99
   7 -11  -1  857.59   35.49
  -7 -11   1  967.01   38.94
  11  -1  -7  875.54   36.34
  -7  11  -1  951.72   39.31
   1   7  11  979.65   41.28
   1  -7 -11  939.53   39.31
  11   1   7  877.44   34.90
   7  11   1  931.15   37.03
  -1   7 -11  898.23   37.01
  -7 -11  -1  961.11   37.87
  -7  11   1  957.68   40.73
   7  11  -1  909.02   35.99
   7 -11   1  953.86   40.43
 -11  -1  -7  862.19   31.39
  11   1  -7  931.60   37.21
   1   7 -11  920.76   38.03
  -1   7  11  947.02   38.99
  -1  -7 -11  932.52   38.63
  11  -1   7  930.49   35.61
  -7  11   1  943.37   36.61
  -8 -11   1  106.64    2.86
  -8  11  -1  110.39    4.50
   1  -8 -11  107.38    4.04
  -8  11  -1   97.35    2.07
   8  11   1  119.06    3.13
  11  -1  -8  110.80    3.28
 -11   1  -8  111.03    2.94
  -1   8 -11  104.30    4.53
   1   8  11  109.92    3.61
   8 -11  -1  105.37    3.52
  11   1   8  106.15    3.00
  -1   8  11  113.09    4.55
   8 -11   1  112.10    4.61
  -1  -8 -11  107.88    3.21
  11   1  -8  107.71    3.11
  -8 -11  -1  116.89    2.87
  -8  11   1  108.60    3.58
   8  11  -1  109.39    3.16
   1   8 -11  112.27    3.79
 -11  -1  -8  105.64    2.39
   9 -11  -1  515.03   19.04
  -9  11  -1  537.36   21.02
  11   1   9  491.88   17.40
   1   9  11  543.83   19.92
   1  -9 -11  553.71   19.92
  -1   9 -11  503.89   18.79
  11  -1  -9  534.49   19.10
   9  11   1  552.66   17.93
 -11   1  -9  521.78   17.82
   9  11  -1  511.86   17.71
  11   1  -9  557.73   19.76
   9 -11   1  536.00   20.96
  -9  11   1  545.75   21.36
  -9 -11  -1  521.07   17.34
 -11  -1  -9  552.96   17.77
  -1   9  11  517.30   20.51
   1   9 -11  529.32   21.25
  -1  -9 -11  555.96   20.57
  -1  10 -11   11.98    1.49
 -10  11  -1   10.32    0.85
  10 -11  -1    9.60    1.37
   1  10  11   10.34    1.44
   1 -10 -11   10.04    0.77
  10  11   1   10.07    0.36
  11   1  10   12.07    0.67
 -11   1 -10   11.46    0.59
  11  -1 -10   11.50    1.10
   1 -10  11   11.23    1.68
   1  10 -11   10.98    0.94
 -10  11   1   11.04    0.86
  10 -11   1   12.06    0.88
  10  11  -1   11.27    0.51
  11   1 -10   12.56    1.06
  -1 -10 -11   10.41    1.02
 -11  -1 -10   11.68    0.45
  -1  10  11   11.06    1.35
  -2   0 -11  195.73    6.28
   0  11   2  183.86    6.00
   2   0 -11  205.60    6.60
  11   2   0  211.77    4.94
   0  11  -2  196.94    5.86
 -11   2   0  195.08    5.34
   0 -11   2  195.05    5.73
  11  -2   0  192.58    5.33
  -2   0 -11  189.08    5.41
   0 -11  -2  193.27    6.14
  11   2   1   42.72    0.70
  -2   1 -11   39.46    1.71
  -1  11  -2   40.44    1.34
   1  11   2   40.38    1.24
 -11   2  -1   39.20    1.08
  -2   1 -11   38.35    1.16
  11   2   1   39.95    0.64
   1 -11  -2   37.21    1.23
  11  -2  -1   44.03    1.26
   2  -1 -11   45.08    1.86
  -1 -11   2   41.34    1.75
 -11   2   1   40.85    0.97
   1  11  -2   39.50    1.29
  -1 -11  -2   41.29    1.26
   2   1 -11   38.90    1.88
  11  -2   1   39.86    1.14
   1 -11   2   41.84    1.38
  -2  -1 -11   42.08    1.67
   2   1 -11   52.90    1.91
  -1  11   2   39.89    1.28
  11   2  -1   41.41    0.92
  -2  -1 -11   36.51    1.19
  -2   2 -11   16.42    0.64
   2  -2 -11   16.85    0.81
   2  -2 -11   17.03    0.75
   2  11   2   17.61    0.67
  -2 -11   2   17.30    0.75
   2 -11  -2   17.01    0.77
  11  -2  -2   17.55    0.76
  -2  11  -2   16.70    0.82
  -2   2 -11   17.36    0.77
 -11   2  -2   16.94    0.58
  -2  11   2   18.57    1.13
  -2  -2 -11   16.99    1.11
   2   2 -11   16.65    1.26
   2 -11   2   17.36    0.82
  -2 -11  -2   17.01    0.67
  11  -2   2   18.02    0.48
   2  11  -2   17.47    0.75
  11   2  -2   16.71    0.54
  11  -2  -3  613.65   21.44
   2  -3 -11  617.20   21.90
   2  -3 -11  614.40   22.52
  -2   3 -11  530.95   19.33
  -3  11  -2  577.16   21.72
  -2   3 -11  581.25   20.67
   3 -11  -2  572.09   20.52
 -11   2  -3  617.63   20.62
  -3 -11   2  624.40   22.72
   3  11   2  598.48   20.86
   2   3 -11  544.40   19.79
  11  -2   3  569.57   18.95
  -2  -3 -11  611.73   21.67
  -2  -3 -11  591.61   21.30
  11  -2   3  546.40   16.92
  -3  11   2  596.48   22.13
  -3 -11  -2  617.66   21.94
  -3  11   2  603.54   21.48
  11   2  -3  635.66   21.32
   3 -11   2  576.43   20.65
   3  11  -2  583.16   21.43
  -2   4 -11   46.73    1.47
  11  -2  -4   41.64    1.15
   4  11   2   41.86    1.43
  -4  11  -2   39.87    1.45
   2   4  11   42.88    1.89
  -4 -11   2   41.47    1.31
   2  -4 -11   43.86    1.51
   2  -4 -11   42.61    1.81
  -2   4 -11   39.49    1.17
   4 -11  -2   39.44    2.02
 -11   2  -4   40.90    1.08
  11   2  -4   42.43    1.02
  -4  11   2   40.25    1.42
  -2  -4 -11   44.87    1.51
  11  -2   4   39.88    0.76
  -4  11   2   43.63    1.43
   4  11  -2   40.40    1.63
  -2  -4 -11   42.25    1.56
   2   4 -11   43.27    1.59
  11  -2   4   41.89    1.15
  -4 -11  -2   41.63    1.49
   4 -11   2   38.92    1.47
  11  -2  -5  247.07    7.19
  -2   5 -11  245.01    7.60
  -5  11  -2  247.74    8.61
   5  11   2  234.02    7.05
  -5 -11   2  246.74    7.92
  11   2   5  240.51    7.03
   2  -5 -11  257.22    7.95
   5 -11  -2  250.07    7.81
   2  -5 -11  238.50    7.33
   2   5  11  242.02    8.21
 -11   2  -5  252.14    6.73
  -2   5 -11  231.00    7.99
  11  -2   5  235.68    6.40
  11  -2   5  240.22    5.93
  -5 -11  -2  236.54    6.79
   5  11  -2  241.75    7.66
   5 -11   2  243.41    7.71
  11   2  -5  243.83    7.24
  -5  11   2  250.78    7.42
   2   5 -11  235.71    7.53
  -5  11   2  240.94    7.59
  -2  -5 -11  240.71    7.10
 -11   2  -6  415.69   13.29
  -6 -11   2  432.63   14.37
   6  11   2  435.12   14.14
   2  -6 -11  436.32   15.04
   2  -6 -11  423.15   15.22
   2   6  11  431.53   15.69
  -2   6 -11  398.41   13.81
  11   2   6  430.27   13.59
   6 -11  -2  440.60   15.19
  -6  11  -2  460.12   14.11
  -6  11  -2  440.96   15.23
  11  -2  -6  427.67   14.09
  11   2  -6  449.06   14.99
   6 -11   2  437.44   15.09
  -6  11   2  438.86   14.33
  -2  -6 -11  429.96   14.21
   6  11  -2  440.78   15.03
  11  -2   6  421.97   13.54
   2   6 -11  427.10   14.85
  -6  11   2  416.57   15.50
  -6 -11  -2  432.85   13.72
  -7 -11   2  553.27   19.64
   7  11   2  594.27   20.44
   7 -11  -2  579.11   21.35
   2  -7 -11  577.94   21.95
  -2   7 -11  573.05   21.09
   2   7  11  576.53   21.15
   2  -7 -11  619.94   22.58
  -7  11  -2  567.72   18.47
  -7  11  -2  557.85   21.92
 -11   2  -7  566.77   19.55
  11  -2  -7  554.27   19.83
  11   2   7  563.53   19.35
  11   2  -7  562.80   20.47
   7  11  -2  572.83   20.71
  -7 -11  -2  589.19   19.83
  -2  -7 -11  581.47   21.31
   2   7 -11  585.13   21.62
  -7  11   2  573.38   19.29
  11  -2   7  558.93   19.42
  -7  11   2  541.34   21.32
   7 -11   2  557.87   22.00
  -8  11  -2  382.08   13.31
   2  -8 -11  381.52   13.00
  11   2   8  382.07   12.02
  11  -2  -8  375.69   13.40
   8  11   2  406.42   12.46
 -11   2  -8  392.81   12.07
  -8 -11   2  383.21   12.77
   8 -11  -2  391.50   13.53
  11  -2  -8  390.13   13.52
   2   8  11  389.36   13.35
  -2   8 -11  393.69   14.70
  -8  11  -2  349.67    9.31
   2   8 -11  377.60   13.19
  -8  11   2  396.72   14.75
   8  11  -2  371.59   12.40
 -11  -2  -8  334.57    8.92
  -8 -11  -2  397.69   12.35
  -2  -8 -11  383.59   13.28
   8 -11   2  376.78   14.40
 -11  -2  -8  370.42    9.91
  11   2  -8  395.98   13.56
  11   2   9 1504.80   70.51
   2  -9 -11 1477.97   70.04
 -11   2  -9 1444.36   66.10
  11  -2  -9 1503.58   70.94
  -2   9 -11 1443.33   71.19
  11  -2  -9 1480.46   71.30
   2   9  11 1482.55   70.53
   9  11   2 1559.88   69.15
  -9  11  -2 1515.66   72.30
   9 -11  -2 1532.39   74.60
   9 -11   2 1459.46   71.48
  -9 -11  -2 1564.25   69.06
   9  11  -2 1577.92   72.86
   2   9 -11 1571.80   76.76
 -11  -2  -9 1353.21   58.32
  -2   9  11 1503.05   73.72
   2  -9  11 1534.89   76.05
  -9  11   2 1486.66   71.12
  11   2  -9 1530.43   72.98
  -2  -9 -11 1465.69   68.82
 -11  -2  -9 1499.61   64.11
   2 -10 -11    7.25    1.06
  11  -2 -10    7.65    1.00
  10 -11  -2    7.77    0.77
  -2  10 -11    8.58    0.79
 -11   2 -10    7.71    0.55
  10  11   2    6.95    0.27
  11  -2 -10    7.73    0.56
   2  10  11    7.14    0.75
  11   2  10    7.21    0.62
 -10  11  -2    7.10    1.12
   2 -10  11    8.36    1.48
  11   2 -10    7.14    0.85
  10 -11   2    8.08    1.19
 -11  -2 -10    7.22    0.30
  10  11  -2    6.87    0.47
  -2  10  11    7.46    1.12
 -10  11   2    7.23    1.15
  -2 -10 -11    8.05    0.81
 -11  -2 -10    6.56    0.26
   2  10 -11    7.83    0.81
   0 -11   3  281.48    8.72
   0  11  -3  281.53    8.77
  11   3   0  304.78    7.44
  -3   0 -11  267.31    8.72
   0  11   3  294.53    9.57
  11  -3   0  307.38    8.70
 -11   3   0  279.17    8.35
   0 -11  -3  277.77    8.49
   3   0 -11  314.63    9.56
  -3   0 -11  264.82    8.11
  11   3   0  285.25    7.07
 -11   3  -1 1083.98   44.89
  11  -3  -1 1101.26   45.21
  -1 -11   3 1078.53   45.57
   1 -11  -3 1122.17   47.06
  -3   1 -11 1134.12   47.48
   3  -1 -11 1193.17   49.93
   1  11   3 1154.93   49.30
  -3   1 -11 1090.07   45.38
  -1  11  -3 1144.23   48.38
 -11   3   1 1095.91   45.14
   1 -11   3 1166.90   50.14
  -3  -1 -11 1058.37   44.43
  11  -3   1 1073.01   44.52
  11   3  -1 1170.14   45.18
  11   3  -1 1134.47   44.20
  -1  11   3 1063.90   45.01
   1  11  -3 1138.35   49.04
  -3  -1 -11 1129.34   47.99
   3   1 -11 1212.79   50.81
  -1 -11  -3 1076.99   46.04
   3  -2 -11    3.16    0.42
  -2 -11   3    4.11    0.42
   2  11   3    3.12    0.54
   2 -11  -3    2.70    0.42
 -11   3  -2    4.99    0.36
  -3   2 -11    2.72    0.33
  -3   2 -11    3.12    0.39
  11  -3  -2    4.39    0.48
  -2  11  -3    2.66    0.47
   3  -2 -11    2.93    0.46
  11   3  -2    2.58    0.24
   3   2 -11    5.90    0.84
  11  -3   2    2.69    0.38
  11   3  -2    3.98    0.28
   2 -11   3    3.93    0.49
  -2 -11  -3    4.29    0.55
 -11   3   2    3.08    0.42
  -3  -2 -11    2.94    0.42
  -3  -2 -11    3.02    0.57
  -2  11   3    3.16    0.35
   2  11  -3    2.65    0.42
  -2  11   3    3.48    0.42
  -3   3 -11    4.46    0.57
 -11   3  -3    5.51    0.39
  -3   3 -11    4.63    0.47
   3  11   3    8.42    0.58
  -3 -11   3    5.15    0.72
  11  -3  -3    4.22    0.55
   3  -3 -11    4.75    0.77
   3  -3 -11    5.09    0.53
  -3  11  -3    5.20    0.87
  -3  -3 -11    4.39    0.36
  -3  11   3    5.00    0.51
  11  -3   3    4.71    0.44
  -3 -11  -3    4.80    0.37
   3   3 -11    5.37    0.93
  -3  -3 -11    5.95    0.79
  11   3  -3    5.43    0.38
   3 -11   3    3.67    0.55
  11   3  -3    5.14    0.34
  -3  11   3    4.93    0.37
   3  11  -3    5.90    0.47
   3  -4 -11  677.81   26.27
  -4 -11   3  682.22   25.31
   4 -11  -3  690.90   25.81
  -4  11  -3  693.09   26.15
   4  11   3  737.52   27.05
   3  -4 -11  736.68   27.38
 -11   3  -4  708.54   25.38
  11  -3  -4  666.86   23.96
  -3   4 -11  641.77   23.39
   3   4  11  681.40   25.39
  -3   4 -11  673.14   24.99
  11  -3  -4  686.34   25.68
   4  11  -3  670.36   25.84
  -4 -11  -3  705.82   25.94
  -4  11   3  656.02   25.75
  11  -3   4  655.35   23.22
   4 -11   3  674.59   25.33
  11   3  -4  654.46   23.62
  -4  11   3  720.68   26.77
  -3  -4 -11  708.97   26.34
   3   4 -11  669.22   25.39
  11   3  -4  699.16   25.12
   3  -5 -11  132.66    3.99
  11  -3  -5  126.45    3.51
  -5 -11   3  138.42    4.49
   5  11   3  127.60    3.64
  -3   5 -11  122.74    4.40
 -11   3  -5  128.01    3.47
  -3   5 -11  115.34    3.57
  11  -3  -5  119.63    3.85
   3   5  11  129.88    3.87
   3  -5 -11  129.43    3.87
   5 -11  -3  127.68    4.76
  -5  11  -3  130.61    4.79
  -3  -5 -11  130.35    3.55
  -5  11   3  121.47    4.54
  -5  11   3  131.77    3.86
  11   3  -5  131.57    3.80
   3   5 -11  128.53    4.05
  11  -3   5  128.58    3.61
  11   3  -5  128.40    3.28
   5 -11   3  120.86    4.65
   5  11  -3  126.49    3.61
  -5 -11  -3  125.91    3.31
   6  11   3   76.25    1.87
  11  -3  -6   72.01    2.19
   6 -11  -3   71.24    3.20
  -6  11  -3   72.95    3.19
   3  -6 -11   79.90    2.57
   3   6  11   73.75    2.37
  11   3   6   74.72    2.28
  -3   6 -11   70.94    1.93
 -11   3  -6   73.97    2.11
   3  -6 -11   73.51    2.36
  11  -3  -6   73.42    2.61
  -6 -11   3   77.78    2.77
  -3   6 -11   69.58    2.31
  -6  11   3   74.76    3.16
   6 -11   3   68.89    2.42
  11   3  -6   73.27    2.28
   3   6 -11   70.70    2.49
  -3  -6 -11   74.95    2.04
   6  11  -3   74.06    2.58
  11   3  -6   76.00    2.49
  -6  11   3   74.67    1.92
  -6 -11  -3   75.11    2.18
  11  -3   6   74.59    2.24
  11   3   7   26.27    1.15
  11  -3  -7   25.02    1.49
   3   7  11   27.75    1.29
  -7  11  -3   27.85    1.33
  -7  11  -3   28.85    0.68
   7 -11  -3   26.82    1.95
   3  -7 -11   28.66    1.34
  -3   7 -11   31.10    1.92
 -11   3  -7   27.87    0.79
  11  -3  -7   29.02    1.20
   3  -7 -11   27.94    1.22
  -7 -11   3   30.25    1.45
   7  11   3   30.35    0.95
   7  11  -3   27.68    1.30
  11  -3   7   28.15    1.17
  -3  -7 -11   29.02    1.26
  -7 -11  -3   27.77    0.98
   3   7 -11   28.25    1.37
   7 -11   3   27.20    1.96
  -7  11   3   27.81    0.75
  -7  11   3   27.35    1.88
  11   3  -7   28.01    1.21
  11   3  -7   29.37    1.44
  11  -3  -8 1725.30   86.52
  -8  11  -3 1729.44   86.48
   8 -11  -3 1758.97   87.31
   3   8  11 1781.77   90.29
  -3   8 -11 1753.66   87.33
 -11   3  -8 1833.83   88.54
   8  11   3 1781.78   84.61
  11  -3  -8 1699.09   83.75
  11   3   8 1726.95   85.32
   3  -8 -11 1737.11   86.33
  11   3  -8 1794.59   87.74
   8  11  -3 1759.11   87.64
   8 -11   3 1768.90   89.81
  11  -3   8 1804.58   88.14
  11   3  -8 1694.43   83.66
   3   8 -11 1795.11   89.10
  -8 -11  -3 1797.79   85.07
  -8  11   3 1819.20   92.36
   3  -8  11 1793.76   92.40
  -3  -8 -11 1796.61   87.82
 -11   3  -9   11.07    0.71
  11  -3  -9   10.26    0.90
   3  -9 -11    9.95    0.81
  11   3   9   10.87    0.77
   9 -11  -3    9.43    0.89
  -3   9 -11   10.50    1.43
  11  -3  -9    9.52    0.75
   9  11   3   10.98    0.35
   3   9  11   12.33    1.40
  -9  11  -3    9.96    1.32
  -3  -9 -11   10.52    0.57
  -9 -11  -3    9.72    0.39
   3  -9  11    9.67    1.65
   9 -11   3   10.92    1.38
   9  11  -3    9.67    0.73
  11   3  -9    9.75    1.08
  11   3  -9   10.84    0.94
  -9  11   3    9.99    1.33
   3   9 -11    9.06    1.42
  11  -3 -10  183.46    5.79
   3 -10 -11  179.93    6.78
  11  -3 -10  184.99    6.23
 -10  11  -3  197.52    7.20
  10 -11  -3  177.10    6.90
  11   3  10  179.45    5.72
 -11   3 -10  183.10    5.23
  -3  10 -11  186.47    7.17
   3  10  11  186.14    6.14
  11   3 -10  186.78    5.92
  11   3 -10  184.47    5.63
 -10  11   3  179.86    5.96
   3  10 -11  177.53    5.99
  -3  10  11  192.31    7.08
  -3 -10 -11  178.68    5.79
  10 -11   3  188.85    7.02
   3 -10  11  191.00    7.91
  10  11  -3  188.79    5.24
   0 -11  -4  849.30   32.73
  -4   0 -11  846.13   32.37
   0 -11   4  859.70   34.56
 -11   4   0  873.38   33.47
   0  11   4  883.73   34.87
   0  11  -4  881.39   34.46
  11  -4   0  836.88   31.67
   0  11   4  815.55   32.61
  -4   0 -11  827.40   32.50
  11   4   0  685.89   22.45
   4   0 -11  978.57   38.48
  -1 -11   4   21.84    0.97
  -4   1 -11   20.53    0.78
   4  -1 -11   23.56    1.45
   1  11   4   22.24    1.15
  -4   1 -11   21.60    0.81
   1 -11  -4   21.71    0.89
  11  -4  -1   23.28    1.03
  -1  11  -4   21.76    1.01
  11  -4  -1   20.12    0.41
 -11   4  -1   22.18    0.93
   4  -1 -11   22.94    0.95
  11   4  -1   23.37    0.50
   1  11  -4   22.48    0.96
  11  -4   1   23.29    0.97
  -4  -1 -11   22.91    0.87
  -1  11   4   22.03    1.27
  -1  11   4   23.85    0.87
  11   4  -1   22.07    0.58
 -11   4   1   21.73    0.71
  -4  -1 -11   20.71    1.09
   1 -11   4   21.01    1.50
  -1 -11  -4   21.44    1.17
  -4   2 -11  429.38   14.15
   2 -11  -4  442.09   14.72
  11  -4  -2  460.45   15.33
  11  -4  -2  434.87   12.72
   4  -2 -11  455.31   16.00
   4  -2 -11  483.90   16.90
 -11   4  -2  427.19   14.05
  -2 -11   4  449.28   15.07
  -2  11  -4  425.16   15.48
  -4   2 -11  429.60   13.89
   2  11   4  435.62   14.33
   2 -11   4  417.69   15.23
  -2  11   4  418.21   14.18
  11   4  -2  427.81   12.99
  11   4  -2  416.64   12.56
  -4  -2 -11  431.73   14.68
  11  -4   2  422.79   13.51
  -2  11   4  438.33   15.16
  -4  -2 -11  447.88   15.57
 -11   4   2  440.13   14.75
   2  11  -4  449.31   15.05
   4   2 -11  437.84   15.95
  -2 -11  -4  441.46   15.03
   4  -3 -11    8.60    1.05
   4  -3 -11    9.22    0.96
  11  -4  -3    8.12    0.35
  11  -4  -3    9.00    0.49
  -4   3 -11    8.80    0.69
 -11   4  -3    8.67    0.57
  -3  11  -4    8.39    0.71
   3 -11  -4    8.53    1.01
   4   3  11    8.47    0.57
  -3 -11   4    9.21    0.98
   3 -11   4    8.71    0.71
  11   4  -3   10.51    0.42
  11   4  -3    8.43    0.45
  -3  11   4    9.21    0.52
  -3 -11  -4    9.40    0.70
  -4  -3 -11   10.24    0.43
  -3  11   4    8.46    0.65
  11  -4   3    8.37    0.42
  -4  -3 -11    8.80    0.73
   3  11  -4    7.57    0.57
   4   3 -11    8.94    1.16
 -11   4   3    8.24    0.70
  11  -4  -4  334.31    9.73
   4  11   4  374.59   11.90
  11  -4  -4  350.95   11.59
  -4   4 -11  343.26   11.76
  -4 -11   4  369.86   12.01
   4  -4 -11  356.32   12.42
   4  -4 -11  358.94   12.67
  -4  11  -4  354.14   12.73
   4 -11  -4  337.13   11.16
  -4   4 -11  337.69   10.45
 -11   4  -4  335.24   10.25
   4   4  11  336.04   11.68
  11  -4   4  345.02   11.07
   4  11  -4  347.44   11.88
  -4 -11  -4  366.06   11.18
 -11   4   4  342.75   10.83
   4   4 -11  348.61   11.63
  -4  11   4  361.48   11.88
   4 -11   4  327.66   10.97
  11   4  -4  337.18   10.49
  -4  11   4  355.84   11.70
  -4  -4 -11  358.26   11.46
  11   4  -4  362.96   10.98
  11  -4  -5  453.34   14.57
   5  11   4  494.12   16.50
   4  -5 -11  469.85   17.36
  -4   5 -11  442.12   15.39
   4   5  11  469.49   17.07
  -4   5 -11  477.88   16.22
  11  -4  -5  450.54   15.31
   5 -11  -4  455.10   16.07
  -5  11  -4  456.62   16.25
  -5 -11   4  453.78   15.81
   4  -5 -11  511.34   18.67
 -11   4  -5  432.70   14.84
   5  11  -4  482.96   17.25
  11  -4   5  488.18   16.52
  -5  11   4  465.22   17.39
  -5 -11  -4  457.88   15.43
   5 -11   4  473.84   17.84
  11   4  -5  479.46   15.47
  11   4  -5  471.37   15.99
   4   5 -11  460.71   16.41
  -5  11   4  488.01   16.23
  -4  -5 -11  489.98   16.64
  11   4   6  994.48   41.05
  11  -4  -6  956.57   39.30
  11  -4  -6  925.68   38.13
   6  11   4 1027.59   41.07
   4  -6 -11 1013.90   43.41
   6 -11  -4  961.68   40.34
 -11   4  -6 1010.18   40.57
  -4   6 -11  922.80   39.97
  -6 -11   4 1034.32   42.76
  -6  11  -4  943.41   39.82
   4  -6 -11 1028.33   44.12
  -4   6 -11  933.76   38.57
   4   6  11  975.43   40.50
  11   4  -6  938.26   38.21
  -4  -6 -11  981.64   40.50
  -6  11   4 1031.14   42.37
   6  11  -4  993.19   41.89
  -6  11   4  974.79   40.86
  -6 -11  -4 1015.22   40.63
  11  -4   6 1003.18   40.28
  11   4  -6  987.63   40.55
   6 -11   4  971.45   40.73
   4   6 -11  993.32   41.56
  -4   7 -11   71.20    3.05
   4  -7 -11   70.59    3.13
   4  -7 -11   64.21    2.93
  11  -4  -7   64.04    2.03
   7  11   4   76.27    1.93
   4   7  11   68.38    3.05
   7 -11  -4   64.33    2.35
  -4   7 -11   63.11    1.72
  11   4   7   71.77    2.36
  11  -4  -7   67.07    2.11
  -7 -11   4   67.24    2.58
 -11   4  -7   65.20    1.78
  -7  11  -4   64.77    3.13
  11  -4   7   68.40    2.32
   7  11  -4   65.59    1.95
  -7 -11  -4   67.67    1.86
  -7  11   4   66.41    2.00
  -4  -7 -11   63.35    1.76
   4   7 -11   67.13    2.41
   7 -11   4   66.71    3.26
  11   4  -7   64.94    2.45
  -7  11   4   71.21    2.44
  11   4  -7   67.79    2.18
   4  -7  11   64.72    2.50
   4   8  11   30.38    1.96
  -8  11  -4   31.59    2.09
   8  11   4   31.33    0.82
  11  -4  -8   29.71    1.31
  11   4   8   28.08    0.99
   8 -11  -4   32.21    2.08
  -4   8 -11   32.05    1.44
 -11   4  -8   30.95    1.28
  11  -4  -8   29.42    1.75
   4  -8 -11   28.86    1.94
  -8  11   4   33.61    1.43
  -8 -11  -4   30.83    0.87
   4  -8  11   29.10    1.56
   8  11  -4   30.36    1.40
  11   4  -8   30.15    1.37
  11  -4   8   31.98    1.42
   4   8 -11   31.20    1.48
  -4  -8 -11   28.39    1.23
  11   4  -8   29.40    1.58
   8 -11   4   29.07    2.10
  -4   9 -11   64.35    2.34
  11  -4  -9   61.56    2.10
   4   9  11   63.15    3.08
  11  -4  -9   61.27    1.85
   4  -9 -11   64.71    2.29
  -9  11  -4   65.83    3.06
 -11   4  -9   64.71    1.81
   9 -11  -4   61.52    2.32
  11   4   9   65.39    2.32
   9 -11   4   60.50    3.06
   4   9 -11   64.18    3.11
  -4  -9 -11   60.12    1.73
  -9 -11  -4   62.54    1.41
  -9  11   4   64.78    2.32
  11   4  -9   64.04    1.92
  11   4  -9   59.45    2.01
  11  -4   9   65.10    2.27
   4  -9  11   63.56    3.54
   9  11  -4   63.37    2.13
 -10  11  -4 1408.16   67.09
  10 -11  -4 1373.57   65.10
   4 -10 -11 1311.74   61.05
  11   4  10 1377.08   63.63
 -11   4 -10 1427.66   64.54
   4  10  11 1292.84   60.28
  11  -4 -10 1333.49   62.66
  -4  10 -11 1358.48   63.35
  11  -4 -10 1261.12   58.48
   4  10 -11 1396.61   66.53
  11   4 -10 1349.78   62.17
   4 -10  11 1300.50   61.68
  10  11  -4 1396.85   62.57
  -4 -10 -11 1313.31   60.48
 -10  11   4 1321.59   63.53
  10 -11   4 1320.46   63.25
  11   4 -10 1308.40   60.69
   0  11   5    1.15    0.33
   0  11   5    0.45    0.28
 -11   5   0    1.10    0.36
   5   0 -11    0.96    0.56
   0  11  -5    0.59    0.56
  -5   0 -11    0.73    0.24
   0 -11   5    0.58    0.61
   0 -11  -5    0.47    0.48
  11  -5   0    0.87    0.25
 -11   5  -1  223.80    6.88
  -5   1 -11  219.52    6.43
   1  11   5  226.76    7.27
   5  -1 -11  222.79    7.44
   1  11   5  227.08    6.96
  -1  11  -5  217.24    6.91
   5  -1 -11  241.50    8.15
  -1 -11   5  235.78    7.30
  -5   1 -11  223.13    6.48
  11  -5  -1  232.25    6.74
   1 -11  -5  226.20    7.52
  11   5  -1  242.33    5.90
 -11   5   1  222.58    6.49
  -1 -11  -5  220.67    7.10
  -1  11   5  221.46    6.76
  -1  11   5  222.19    6.74
  11  -5   1  231.58    7.13
  11   5  -1  269.87    6.45
  -5  -1 -11  230.59    6.64
   1  11  -5  232.28    7.92
  -5  -1 -11  216.52    6.49
   1 -11   5  224.85    7.06
   2 -11  -5 1225.19   54.11
   2  11   5 1187.73   51.14
   5  -2 -11 1178.06   52.14
   5  -2 -11 1302.56   57.54
  -5   2 -11 1192.43   52.05
  -2 -11   5 1224.44   53.35
  11  -5  -2 1183.54   50.61
  -5   2 -11 1223.17   52.70
   2  11   5 1205.33   53.55
  -2  11  -5 1222.76   53.49
  11  -5  -2 1111.06   44.86
 -11   5  -2 1163.90   49.69
   2 -11   5 1236.86   55.15
  -5  -2 -11 1100.26   47.86
  -2 -11  -5 1220.50   52.08
  11   5  -2 1223.54   49.91
 -11   5   2 1206.66   51.69
  -2  11   5 1221.18   53.81
  11   5  -2 1183.98   48.13
  -2  11   5 1209.86   53.56
   5   2 -11 1175.15   52.88
   2  11  -5 1151.91   51.76
  11  -5   2 1145.91   48.89
 -11   5  -3    4.21    0.52
  11  -5  -3    4.78    0.41
   5  -3 -11    4.86    0.85
  -5   3 -11    4.99    0.69
  -3 -11   5    4.98    0.92
  -3  11  -5    5.10    0.93
  -5   3 -11    3.47    0.35
   3 -11  -5    3.39    0.52
   3  11   5    3.62    0.35
  11  -5  -3    4.02    0.25
   5   3  11    4.06    0.70
   5  -3 -11    5.43    0.83
 -11   5   3    3.67    0.39
   3 -11   5    5.06    0.98
  -3  11   5    4.25    0.44
  11   5  -3    3.94    0.30
  -3  11   5    4.83    0.80
  11   5  -3    3.75    0.34
  -5  -3 -11    3.38    0.47
  -5  -3 -11    4.31    0.55
   3  11  -5    4.85    0.78
   5   3 -11    4.06    0.62
  11  -5   3    4.48    0.58
  -4  11  -5   39.22    1.57
   5  -4 -11   44.37    2.16
  -5   4 -11   40.43    1.47
   4  11   5   41.21    1.15
  -4 -11   5   42.27    1.57
   4 -11  -5   40.41    1.54
  -5   4 -11   42.59    1.41
   5   4  11   42.15    1.90
  11  -5  -4   40.79    1.33
 -11   5  -4   42.29    1.22
   5  -4 -11   41.43    2.15
  11  -5  -4   38.58    1.05
   4 -11   5   41.47    2.35
 -11   5   4   39.47    1.26
  11   5  -4   41.93    1.29
  11  -5   4   43.58    1.27
   5   4 -11   40.98    1.63
  -5  -4 -11   40.13    1.10
  -4 -11  -5   39.50    1.46
   4  11  -5   49.97    2.04
  11   5  -4   40.66    1.17
  -4  11   5   43.16    1.33
  -4  11   5   39.44    1.51
  -5  -4 -11   42.48    1.54
  -5   5 -11  254.46    7.81
   5 -11  -5  243.34    7.84
   5  11   5  253.18    7.20
  11  -5  -5  237.29    6.89
  -5  11  -5  238.59    7.87
  11  -5  -5  236.97    8.02
 -11   5  -5  240.97    7.14
  -5   5 -11  237.38    8.28
   5  -5 -11  254.17    8.94
   5  -5 -11  259.23    9.14
   5   5  11  249.58    8.57
  -5 -11   5  247.09    8.79
  -5  11   5  242.54    8.67
  11  -5   5  242.15    7.77
  -5  -5 -11  238.95    6.92
  -5  11   5  258.56    8.26
   5 -11   5  243.99    8.98
   5  11  -5  240.23    7.49
  -5 -11  -5  259.65    7.76
  11   5  -5  258.18    7.59
  11   5  -5  244.88    7.49
   5   5 -11  255.50    8.29
  11  -5  -6   58.49    1.93
  11  -5  -6   59.68    1.83
   5   6  11   60.52    2.10
  -5   6 -11   64.74    1.71
  -6 -11   5   66.66    2.77
 -11   5  -6   62.03    1.78
  -5   6 -11   64.60    2.77
   6 -11  -5   59.26    2.23
  11   5   6   62.55    2.33
   5  -6 -11   63.29    2.92
  -6  11  -5   62.02    3.13
   6  11   5   64.19    1.80
   5  -6 -11   68.94    2.99
  -6 -11  -5   66.67    1.90
  -5  -6 -11   62.06    1.93
  11   5  -6   62.37    2.16
   6 -11   5   58.53    2.25
  11  -5   6   64.07    1.85
   5   6 -11   60.54    2.22
  -6  11   5   62.19    2.23
  -6  11   5   62.84    2.13
   6  11  -5   59.53    2.48
 -11   5  -7  914.85   37.85
  11  -5  -7  884.95   37.56
   7 -11  -5  878.95   36.67
   5  -7 -11  904.69   37.68
  -5   7 -11  952.40   39.31
   7  11   5  975.18   37.92
   5   7  11  957.29   40.76
  -5   7 -11  921.01   37.41
  -7  11  -5  957.63   41.22
  11   5   7  958.78   38.70
  11  -5  -7  901.68   36.05
   5  -7 -11  951.73   40.62
  11  -5   7  930.53   38.38
  -5  -7 -11  954.61   38.34
  11   5  -7  904.23   36.67
  -7  11   5  947.99   38.94
  -7  11   5  924.13   38.56
   5  -7  11  926.49   40.60
   7  11  -5  953.67   39.75
   5   7 -11  910.04   37.90
   7 -11   5  875.86   38.30
  -7 -11  -5  922.10   35.92
   5  -8 -11  116.55    3.58
  11  -5  -8  103.20    3.25
   8 -11  -5   98.93    4.31
  -5   8 -11  105.28    3.42
  -8  11  -5  114.20    4.46
  11  -5  -8  101.22    3.20
   5  -8 -11  108.07    3.54
 -11   5  -8  104.62    3.44
   5   8  11  104.69    4.24
  -5   8 -11  102.02    3.05
  11   5   8   97.61    3.49
  -5  -8 -11  104.22    3.09
   8  11  -5  107.41    3.57
  -8 -11  -5  108.14    2.71
   5  -8  11  107.67    3.76
   5   8 -11  104.93    3.48
   8 -11   5  104.61    4.35
  11   5  -8  103.10    3.60
  11  -5   8  104.49    3.04
  -8  11   5  105.96    3.50
  11  -5  -9  830.81   35.30
 -11   5  -9  883.27   36.32
   9 -11  -5  847.00   35.06
  11  -5  -9  852.44   34.68
   5  -9 -11  836.43   36.05
  11   5   9  850.73   35.38
  -5   9 -11  867.29   33.99
  -9  11  -5  904.49   37.28
  -5   9 -11  872.80   35.95
   5   9  11  883.91   37.64
  -5  -9 -11  847.04   33.88
  11  -5   9  903.53   37.08
  -9  11   5  845.52   35.10
  11   5  -9  883.88   36.61
   9 -11   5  868.32   37.03
   9  11  -5  874.07   35.71
   5   9 -11  832.04   34.47
   5  -9  11  837.86   35.31
  -9 -11  -5  812.84   29.56
  11  -5 -10  113.15    4.42
  -5  10 -11  131.67    4.22
   5  10  11  114.87    3.84
   5 -10 -11  112.40    3.81
  10 -11  -5  115.15    4.69
 -10  11  -5  122.18    3.99
  11  -5 -10  113.20    3.32
 -11   5 -10  117.19    3.81
  11   5  10  114.22    3.90
  11  -5  10  111.39    3.38
  10  11  -5  116.59    3.30
  -5 -10 -11  120.30    3.56
   5 -10  11  121.25    4.32
  11   5 -10  117.66    4.25
  10 -11   5  116.99    4.68
   5  10 -11  121.82    4.02
 -10  11   5  117.13    3.90
  -6   0 -11  119.09    3.61
   0 -11   6  113.98    3.70
   0 -11  -6  118.49    3.46
  11  -6   0  118.46    3.37
   6   0 -11  124.28    4.22
   6   0 -11  139.06    4.76
  -6   0 -11  122.50    3.39
   0  11  -6  122.16    4.61
   0  11   6  118.77    4.27
   0  11   6  124.85    3.59
 -11   6   0  124.57    3.46
   6  -1 -11  377.45   13.13
  -1  11  -6  329.94   12.05
   1  11   6  355.62   11.89
 -11   6  -1  326.37   10.41
  -6   1 -11  351.90   10.92
   1 -11  -6  346.91   11.20
  -6   1 -11  348.23   11.40
   6  -1 -11  335.05   10.91
  -1 -11   6  337.61   11.45
   1  11   6  326.17   10.83
  11  -6  -1  326.34   11.12
  -6  -1 -11  336.99   10.88
 -11   6   1  328.83   10.50
   1  11  -6  356.30   11.79
  -1  11   6  345.07   11.20
  -1  11   6  337.63   11.01
  11  -6   1  337.77   10.72
  11   6  -1  357.37    9.70
  -1 -11  -6  349.97   11.11
  11   6  -1  374.14    9.93
   1 -11   6  347.00   11.63
   2 -11  -6  484.92   18.18
   6  -2 -11  511.53   18.04
  -6   2 -11  510.07   17.83
   2  11   6  520.10   17.95
  11  -6  -2  522.18   18.06
   2  11   6  511.69   19.28
 -11   6  -2  526.37   18.10
  -2 -11   6  496.13   18.03
  -2  11  -6  533.75   19.08
  -6   2 -11  486.98   16.79
   6  -2 -11  558.73   20.60
   6   2  11  514.62   18.46
  -2  11   6  507.82   17.90
 -11   6   2  523.50   18.10
   2  11  -6  506.92   18.14
  -6  -2 -11  506.85   17.58
  11   6  -2  532.13   16.77
  -2  11   6  531.18   19.60
  11   6  -2  530.20   16.86
  -2 -11  -6  501.49   18.01
   2 -11   6  506.20   19.49
  11  -6   2  493.61   17.00
   6   2 -11  534.48   19.06
  -3  11  -6 1344.65   61.35
   6  -3 -11 1222.75   54.26
   3 -11  -6 1226.12   54.43
  -6   3 -11 1186.49   51.46
  11  -6  -3 1222.04   50.63
  -6   3 -11 1223.42   54.96
   6   3  11 1237.81   54.25
   3  11   6 1290.51   57.26
  -3 -11   6 1226.41   55.27
 -11   6  -3 1243.06   55.65
   6  -3 -11 1378.86   62.11
  11  -6  -3 1189.28   52.33
   3  11   6 1317.30   58.27
  11  -6   3 1223.00   54.82
  -6  -3 -11 1269.02   55.06
  11   6  -3 1281.94   54.16
  -3  11   6 1295.32   58.46
   6   3 -11 1225.75   54.87
   3  11  -6 1285.97   57.15
 -11   6   3 1278.05   56.15
  -6  -3 -11 1251.10   54.36
  -3 -11  -6 1229.69   53.53
   3 -11   6 1257.02   57.75
  -3  11   6 1284.08   56.97
  11   6  -3 1250.31   53.12
   6  -4 -11    2.09    0.71
   4  11   6    1.73    0.41
   6  -4 -11    1.79    0.74
  11  -6  -4    2.26    0.41
   4  11   6    1.66    0.50
  11  -6  -4    1.97    0.25
   4 -11  -6    1.90    0.46
  -4  11  -6    1.90    0.52
  -4 -11   6    3.02    0.83
  -6   4 -11    1.80    0.41
  -6   4 -11    1.90    0.62
   6   4  11    1.63    0.63
   4 -11   6    2.19    0.89
  -6  -4 -11    1.67    0.42
  -4 -11  -6    1.73    0.45
   4  11  -6    1.75    0.68
  -4  11   6    2.09    0.45
   6   4 -11    1.49    0.82
  11  -6   4    2.31    0.56
  11   6  -4    1.73    0.22
  -6  -4 -11    1.74    0.22
  -4  11   6    1.76    0.58
 -11   6   4    1.86    0.37
   5  11   6    8.63    0.58
  -6   5 -11    7.43    0.60
  -6   5 -11    9.02    0.64
  11  -6  -5    8.09    0.46
 -11   6  -5    8.67    0.79
   5  11   6    8.49    0.80
   6  -5 -11    8.17    1.11
   6   5  11    7.11    1.01
  11  -6  -5    8.14    0.96
   5 -11  -6    8.12    0.75
  -5  11  -6    7.87    0.78
  -5 -11   6    8.01    0.74
  11  -6   5    9.74    0.85
  -5  11   6   11.97    0.85
 -11   6   5    8.17    0.91
  -5 -11  -6    8.24    0.60
   5 -11   6    6.94    1.27
  -5  11   6    9.23    1.15
   6   5 -11   10.32    1.25
  -6  -5 -11    7.77    0.37
  -6  -5 -11    7.07    0.62
   5  11  -6    7.54    0.62
  11   6  -5    7.77    0.61
 -11   6  -6  783.04   30.08
   6  -6 -11  736.51   29.12
   6   6  11  728.28   28.55
  -6   6 -11  786.02   29.21
  -6   6 -11  775.31   30.22
   6  11   6  784.20   29.15
   6  -6 -11  760.47   29.71
  11  -6  -6  739.23   29.89
  -6  11  -6  760.03   31.65
  11  -6  -6  701.11   26.63
   6 -11  -6  722.44   28.72
  11  -6   6  765.09   30.21
  11   6  -6  752.11   28.37
   6 -11   6  738.30   29.40
  -6  -6 -11  726.13   27.55
  -6 -11  -6  774.38   28.36
   6  11  -6  771.56   31.05
  -6  11   6  780.98   30.01
   6   6 -11  745.07   30.75
  -6  11   6  746.99   29.65
  -6   7 -11   17.75    0.62
   6  -7 -11   16.93    0.98
 -11   6  -7   16.30    1.12
  -6   7 -11   19.07    0.99
  11  -6  -7   16.20    0.84
  11  -6  -7   16.43    1.38
  11   6   7   15.70    0.83
  -7  11  -6   17.02    1.66
   6  -7 -11   16.97    1.08
   6   7  11   16.23    1.49
   7 -11  -6   17.54    1.07
   6  -7  11   17.70    1.08
   6   7 -11   17.26    1.56
   7  11  -6   21.58    0.89
  -6  -7 -11   15.34    0.55
  -7  11   6   16.50    1.59
   7 -11   6   17.86    1.73
  11   6  -7   17.11    0.74
  11  -6   7   17.59    1.20
  -7 -11  -6   16.17    0.68
  11  -6  -8  243.34    7.77
   8 -11  -6  237.24    9.08
 -11   6  -8  249.51    8.39
  -6   8 -11  257.78    8.46
  -8  11  -6  261.61    9.65
   6  -8 -11  249.25    9.36
  11  -6  -8  250.92    8.17
   6  -8 -11  249.52    8.09
  11   6   8  253.67    8.00
   6   8  11  252.81    9.26
  -6   8 -11  312.21    8.99
   8  11  -6  258.09    8.09
   8 -11   6  238.40    9.25
  11  -6   8  258.94    8.84
  -6  -8 -11  258.15    7.72
  11   6  -8  247.15    8.34
  -8  11   6  248.24    9.31
   6   8 -11  253.73    9.38
   6  -8  11  247.90    9.67
  -8 -11  -6  251.20    7.04
   9 -11  -6  585.38   22.39
  -6   9 -11  660.28   23.33
  -9  11  -6  628.61   24.99
  11  -6  -9  562.74   21.35
   6  -9 -11  590.10   22.56
  11  -6  -9  595.55   22.14
  -6   9 -11  630.88   23.90
 -11   6  -9  590.35   22.79
   6   9  11  591.06   22.40
  11   6   9  588.01   22.79
  -9  11   6  602.33   24.16
   9 -11   6  568.82   21.89
   6   9 -11  606.56   24.13
   6  -9  11  611.94   25.14
  -6  -9 -11  566.39   20.47
   9  11  -6  613.49   22.61
  11   6  -9  579.49   21.58
  11  -6   9  606.45   23.32
  -6  10 -11  687.02   25.28
  -6  10 -11  639.63   25.70
  10 -11  -6  594.01   24.33
   6 -10 -11  645.89   26.13
 -11   6 -10  627.01   24.36
  11  -6 -10  603.62   23.20
  11  -6 -10  624.84   24.94
   6  10  11  586.93   22.86
  11   6  10  628.23   23.62
 -10  11  -6  666.29   26.74
  11  -6  10  604.99   23.11
   6  10 -11  593.12   23.04
   6 -10  11  641.89   26.66
 -10  11   6  622.72   24.18
  -6 -10 -11  586.05   21.56
  10  11  -6  633.84   24.06
  10 -11   6  604.52   24.64
  11   6 -10  616.17   23.33
  11  -7   0   32.40    1.18
  -7   0 -11   30.63    1.23
 -11   7   0   32.44    1.14
   0  11  -7   37.37    2.12
   0  11   7   32.08    1.57
   7   0 -11   31.88    1.23
   0 -11  -7   32.66    1.63
   0 -11   7   33.02    1.58
   0  11   7   33.48    1.89
   1  11   7   29.31    1.27
   7  -1 -11   28.22    1.20
  -7   1 -11   28.26    0.91
   1 -11  -7   29.03    1.16
   1  11   7   30.48    1.04
   7  -1 -11   33.41    1.83
  11  -7  -1   29.11    1.55
  -1 -11   7   28.02    2.12
  -1  11  -7   28.45    1.35
 -11   7  -1   29.47    1.08
 -11   7   1   30.63    1.07
  11   7  -1   29.42    0.60
  -1 -11  -7   28.48    1.46
  11   7  -1   27.34    0.62
  11  -7   1   29.41    1.55
  -1  11   7   28.37    1.12
  -1  11   7   28.40    1.70
   1 -11   7   29.10    2.22
  -7  -1 -11   28.09    1.10
   1  11  -7   30.74    1.92
  -7   2 -11  826.09   32.31
  11  -7  -2  779.36   31.40
  -7   2 -11  776.15   30.03
  -2  11  -7  819.06   32.48
 -11   7  -2  785.27   30.59
   2  11   7  815.59   31.44
   7  -2 -11  774.43   31.58
   2 -11  -7  777.71   31.85
   7   2  11  771.42   30.67
   2  11   7  785.22   31.09
   7  -2 -11  834.10   33.92
  -2 -11   7  802.39   33.67
  -2  11   7  813.64   33.01
  11   7  -2  794.14   28.93
   2 -11   7  760.09   32.19
   2  11  -7  764.73   31.76
  -2  11   7  793.04   31.13
  11  -7   2  782.08   31.31
  -7  -2 -11  770.77   29.35
 -11   7   2  777.53   31.33
  -2 -11  -7  766.60   29.60
   7   2 -11  786.23   31.17
   3  11   7    2.61    0.52
  -3  11  -7    2.52    0.94
   7   3  11    1.82    0.38
   3  11   7    4.71    0.57
   3 -11  -7    2.02    0.50
   7  -3 -11    2.88    0.82
  -3 -11   7    2.91    1.03
  11  -7  -3    5.05    0.75
  -7   3 -11    3.81    0.46
 -11   7  -3    1.42    0.40
  -7   3 -11    2.48    0.61
   7  -3 -11    1.67    0.51
  11  -7   3    3.02    0.72
  -3  11   7    4.14    0.47
  -3 -11  -7    2.76    0.56
   3 -11   7    2.59    0.65
   3  11  -7    3.93    0.86
 -11   7   3    2.31    0.71
   7   3 -11    6.52    0.61
  -3  11   7    2.00    0.50
  11   7  -3    2.39    0.34
  -7  -3 -11    2.08    0.36
  -7  -3 -11    3.21    0.27
  11  -7  -4    5.95    0.58
   4 -11  -7    5.87    0.68
 -11   7  -4    6.11    0.79
   7  -4 -11    8.16    1.01
  -7   4 -11    5.00    0.33
   4  11   7    5.82    0.72
   7   4  11    6.21    0.54
   7  -4 -11    5.40    0.62
  -4  11  -7    5.91    1.17
  -7   4 -11    6.72    0.82
  -4 -11   7    7.22    1.18
   4  11   7    6.35    0.39
  -4  11   7    6.64    0.54
  -4  11   7    5.86    0.64
  -7  -4 -11    5.74    0.50
  -4 -11  -7    6.87    0.62
   4  11  -7    5.80    1.00
  -7  -4 -11    5.53    0.29
 -11   7   4    5.93    0.85
  11  -7   4    5.78    0.53
   7   4 -11    5.96    0.72
  11   7  -4    5.67    0.48
   4 -11   7    5.84    1.22
  -5  11  -7   24.92    1.29
  -7   5 -11   26.19    1.49
 -11   7  -5   25.40    1.38
   5 -11  -7   24.85    1.24
  -7   5 -11   25.17    0.72
   7  -5 -11   28.84    1.17
  11  -7  -5   27.51    1.62
   7  -5 -11   25.88    1.77
  11  -7  -5   22.96    0.79
   5  11   7   24.62    1.28
  -5 -11   7   26.45    1.32
   5  11   7   26.42    0.77
   7   5  11   24.85    1.09
  -5  11   7   27.08    1.41
   5  11  -7   25.45    1.13
  -7  -5 -11   28.97    0.91
   5 -11   7   25.60    2.02
  11  -7   5   24.51    1.03
  -5 -11  -7   24.52    1.05
  11   7  -5   25.86    1.06
  -7  -5 -11   26.58    0.94
 -11   7   5   25.40    1.08
   7   5 -11   24.39    1.26
  -5  11   7   26.33    1.78
  -7   6 -11   58.57    2.48
   6 -11  -7   57.02    2.12
  11  -7  -6   57.66    2.61
  11  -7  -6   54.87    1.63
   7  -6 -11   57.73    2.07
 -11   7  -6   62.43    2.39
   7   6  11   59.71    2.59
  -7   6 -11   57.04    1.67
   6  11   7   59.36    2.24
   7  -6 -11   62.45    2.07
  -6  11  -7   57.86    2.16
   6  11  -7   60.59    2.59
   6 -11   7   56.42    2.23
  11  -7   6   57.81    2.42
  11   7  -6   56.59    1.96
  -7  -6 -11   56.59    1.67
  -7  -6 -11   54.84    1.55
   7   6 -11   59.02    2.13
  -6 -11  -7   57.51    1.71
  -6  11   7   62.13    1.85
   7  -6  11   57.77    2.13
  -6  11   7   59.42    2.15
 -11   7   6   58.46    2.50
   7  -7 -11  559.41   21.27
  -7   7 -11  584.39   20.84
   7 -11  -7  611.30   24.57
  -7   7 -11  631.48   24.43
  11  -7  -7  541.71   19.67
  11  -7  -7  593.93   22.18
  11   7   7  618.55   22.83
   7  -7 -11  617.76   22.84
 -11   7  -7  622.29   22.98
   7  11   7  628.06   25.09
   7   7  11  602.86   22.60
  -7  11  -7  608.99   24.47
   7  -7  11  602.81   24.28
  -7 -11  -7  582.07   19.90
   7 -11   7  589.18   24.02
  -7  -7 -11  601.74   21.01
   7   7 -11  585.78   22.11
   7  11  -7  620.08   23.06
  -7  -7 -11  593.59   20.43
  -7  11   7  615.32   24.45
  11   7  -7  607.15   21.92
  11  -7   7  593.81   23.01
   7   8  11  349.54   11.85
   7  -8 -11  343.00   12.99
 -11   7  -8  361.69   11.89
  -8  11  -7  357.96   13.41
  -7   8 -11  371.28   12.50
  11  -7  -8  345.16   11.71
   8 -11  -7  338.27   11.69
   8  11   7  334.86   11.74
   7  -8 -11  360.01   12.65
  11  -7  -8  316.26   10.46
  -7   8 -11  327.56    9.94
  11   7   8  335.79   11.29
   8 -11   7  338.80   11.79
  -8 -11  -7  344.29   10.01
  11   7  -8  337.48   11.04
  -7  -8 -11  319.41    9.95
   8  11  -7  352.56   11.70
   7  -8  11  328.62   11.64
  -8  11   7  348.17   12.03
   7   8 -11  337.78   11.63
  11  -7   8  336.60   11.36
  -7   9 -11   93.77    3.11
   9 -11  -7   91.49    3.92
  11  -7  -9   87.18    2.96
 -11   7  -9   97.11    2.91
  -7   9 -11   84.32    2.10
   7   9  11   86.78    2.96
  -9  11  -7   89.87    3.82
   9  11   7   89.41    3.12
  11   7   9   92.24    2.90
  11  -7  -9   88.44    2.80
   7  -9 -11   93.50    3.98
  11  -7   9   92.27    2.88
  11   7  -9   91.38    3.21
  -7  -9 -11   86.92    2.42
   9 -11   7   89.52    3.10
  -9  11   7   92.24    3.13
   7   9 -11   89.35    2.97
   9  11  -7   93.63    2.80
   7  -9  11   93.59    3.33
   7  10  11    2.16    0.84
  10  11   7    2.29    0.52
 -10  11  -7    2.56    0.79
   7 -10 -11    2.69    0.60
  -7  10 -11    2.22    0.27
  -7  10 -11    2.51    0.78
  11   7  10    1.80    0.43
 -11   7 -10    2.68    0.57
  11  -7 -10    2.50    0.51
  10 -11  -7    2.14    0.53
  11   7 -10    2.75    0.39
 -10  11   7    2.06    0.84
  10 -11   7    2.26    0.51
  11  -7  10    2.76    0.69
  -7 -10 -11    1.54    0.30
   7  10 -11    2.48    0.49
   7 -10  11    2.15    0.59
   0  11   8 2598.28  142.95
   8   0 -11 2538.48  139.27
   0 -11  -8 2704.40  149.82
 -11   8   0 2564.95  140.98
  11  -8   0 2445.03  134.05
  11   8   0 2269.62  112.78
   0  11  -8 2660.99  146.70
   0 -11   8 2416.73  134.79
   0  11   8 2571.00  141.33
  11   8   0 2267.93  112.68
  -8   0 -11 2705.36  146.60
  11  -8  -1  230.23    7.21
 -11   8  -1  217.34    7.60
   1  11   8  227.36    8.35
   8  -1 -11  220.84    7.88
  -1  11  -8  220.35    7.40
  -8   1 -11  241.32    7.32
   8  -1 -11  246.89    7.74
  -1 -11   8  224.63    7.69
   1 -11  -8  231.40    7.29
   1  11   8  230.21    7.64
  11   8  -1  227.11    5.96
   1  11  -8  216.02    7.19
  -1  11   8  219.91    7.74
 -11   8   1  223.00    7.00
   1 -11   8  215.54    8.77
  -1  11   8  230.60    7.38
  11  -8   1  229.70    7.97
   8   1 -11  225.56    7.84
  -1 -11  -8  221.05    7.49
  -8  -1 -11  214.94    6.46
   2 -11  -8  237.67    8.72
  -2 -11   8  270.54    9.12
   8   2  11  242.39    7.41
   2  11   8  247.20    8.24
   8  -2 -11  245.98    7.98
   8  -2 -11  278.01    8.81
  11  -8  -2  244.02    7.84
   2  11   8  252.52    7.79
 -11   8  -2  252.14    8.72
  -2  11  -8  258.95    9.86
  -8   2 -11  256.78    7.66
  11  -8   2  255.74    8.08
  -2 -11  -8  254.72    8.39
  -2  11   8  258.05    8.29
  11   8  -2  248.34    7.00
   2 -11   8  257.98    8.82
  -8  -2 -11  248.83    7.43
   2  11  -8  269.01    8.77
 -11   8   2  255.15    8.92
  -2  11   8  252.62    8.14
   3  11   8 1038.50   46.14
   3 -11  -8  989.36   42.39
 -11   8  -3 1068.59   45.30
   3  11   8 1051.84   43.89
   8  -3 -11 1012.71   44.53
  -3 -11   8 1075.35   46.66
  -8   3 -11 1073.35   44.79
   8  -3 -11 1102.28   46.77
  -3  11  -8 1048.19   45.09
   8   3  11 1030.95   44.40
  11  -8  -3 1057.38   46.10
  11   8  -3 1024.14   41.97
   3  11  -8 1000.34   43.19
   8   3 -11 1045.30   46.20
  11  -8   3 1094.48   47.34
  -8  -3 -11 1009.36   40.40
  -8  -3 -11  987.74   40.38
  -3 -11  -8 1024.84   42.66
   3 -11   8  988.37   43.10
 -11   8   3 1063.58   46.34
  -3  11   8 1071.47   47.10
  -3  11   8 1034.47   44.26
  -8   4 -11  717.62   27.75
   8  -4 -11  680.62   26.27
   4 -11  -8  670.06   26.05
  11  -8  -4  687.37   26.31
   8   4  11  665.87   25.28
 -11   8  -4  679.95   27.11
  -8   4 -11  679.83   24.41
   4  11   8  661.84   27.33
  -4 -11   8  710.14   27.93
  -4  11  -8  728.43   29.68
   8  -4 -11  718.63   27.42
   4  11  -8  710.62   27.51
  -8  -4 -11  690.47   24.83
   8   4 -11  699.82   28.26
  -4  11   8  688.36   26.70
  11   8  -4  648.25   23.47
 -11   8   4  680.47   26.16
  -4  11   8  713.25   27.36
  -4 -11  -8  710.27   26.14
   4 -11   8  669.52   26.45
  11  -8   4  656.09   25.21
  -8  -4 -11  677.92   24.47
   8  -5 -11  125.07    4.04
   5  11   8  126.47    5.08
  -8   5 -11  130.07    4.38
 -11   8  -5  124.87    3.80
  11  -8  -5  127.46    4.69
  -8   5 -11  126.38    3.43
   8   5  11  126.89    4.45
   5 -11  -8  126.67    5.01
  -5  11  -8  126.35    5.12
   8  -5 -11  135.14    4.79
  -8  -5 -11  123.29    3.21
  -8  -5 -11  122.82    3.28
   5  11  -8  124.31    4.79
  11  -8   5  126.13    4.50
 -11   8   5  125.95    4.64
  -5  11   8  131.36    4.20
  -5 -11  -8  129.25    3.76
   5 -11   8  121.93    5.23
   8   5 -11  121.25    4.80
  11   8  -5  132.67    3.52
  -5  11   8  131.35    4.55
   8   6  11    0.89    0.36
  -6  11  -8    0.87    0.44
   8  -6 -11    1.36    0.43
  11  -8  -6    1.47    0.67
  -8   6 -11    1.00    0.24
   6  11   8    1.60    0.47
   6 -11  -8    1.42    0.75
 -11   8  -6    0.48    0.55
   8  -6 -11    0.85    0.58
  11  -8   6    0.61    0.36
   6 -11   8    0.70    0.50
  -6 -11  -8    0.60    0.30
  11   8  -6    0.52    0.39
   8  -6  11    0.71    0.41
  -8  -6 -11    1.08    0.24
  -6  11   8    0.47    0.72
 -11   8   6    1.83    0.39
  -8  -6 -11    0.74    0.22
   7 -11  -8  115.76    3.95
  -8   7 -11  115.66    3.00
 -11   8  -7  110.93    4.05
   8   7  11  119.62    4.51
  11  -8  -7  108.80    2.87
  -7  11  -8  112.58    3.77
  11  -8  -7  110.52    3.63
   8  -7 -11  113.79    4.56
  -7  11  -8  111.36    2.80
   7  11   8  117.66    4.80
  11   8   7  118.55    4.41
   8  -7 -11  113.37    4.11
  -8   7 -11  111.56    3.51
  -8  -7 -11  112.39    2.96
   8   7 -11  111.95    3.62
  -7 -11  -8  116.72    3.12
   8  -7  11  115.55    3.79
  11  -8   7  114.77    4.18
  -7  11   8  113.92    3.82
  11   8  -7  115.38    3.27
   7 -11   8  112.30    4.84
  -8  -7 -11  107.05    2.80
   7  11  -8  108.89    4.15
  11  -8  -8   24.62    1.79
   8  11   8   28.47    1.37
  -8   8 -11   24.86    1.63
   8  -8 -11   26.15    1.05
  11  -8  -8   23.59    0.78
   8 -11  -8   26.43    1.93
   8   8  11   24.10    1.76
  11   8   8   28.83    1.69
   8  -8 -11   24.74    1.28
  -8  11  -8   24.73    1.25
 -11   8  -8   31.26    1.56
  -8   8 -11   23.99    0.73
  -8  -8 -11   28.13    0.82
   8   8 -11   24.57    1.17
  -8  -8 -11   24.33    0.74
   8  -8  11   23.70    1.30
   8  11  -8   24.14    1.46
  11   8  -8   24.23    0.94
  11  -8   8   24.89    1.11
  -8 -11  -8   24.58    0.74
   8 -11   8   24.73    1.35
  -8  11   8   25.20    1.82
   8  -9 -11  346.78   13.26
  11  -8  -9  341.89   12.00
  -8   9 -11  365.67   12.67
   9 -11  -8  334.07   11.93
  11   8   9  344.02   12.79
   9  11   8  354.59   13.64
  11  -8  -9  343.98   11.04
 -11   8  -9  361.80   12.40
  -9  11  -8  355.91   12.52
   8   9  11  351.93   13.34
  11  -8   9  341.08   11.92
   9  11  -8  349.31   12.51
   8   9 -11  360.80   12.44
  11   8  -9  360.82   12.10
   9 -11   8  356.92   12.61
   8  -9  11  374.81   13.22
  -9  11   8  346.17   12.30
   8  10  11  739.60   29.99
  11  -8 -10  716.83   28.66
  -8  10 -11  784.38   32.87
  10  11   8  727.80   31.03
  11   8  10  768.64   30.86
 -10  11  -8  748.65   30.45
 -11   8 -10  754.66   31.41
  10 -11  -8  729.44   30.80
  11  -8 -10  746.03   30.14
   8 -10 -11  722.18   29.45
  11   8 -10  740.16   30.45
   8 -10  11  714.96   29.62
   8  10 -11  730.60   30.75
  10 -11   8  752.93   30.58
  11  -8  10  783.28   31.53
  10  11  -8  726.02   29.93
 -10  11   8  746.20   30.49
  11  -9   0 1510.20   72.62
  -9   0 -11 1519.80   69.88
 -11   9   0 1544.40   74.20
   0  11  -9 1481.70   72.81
  11   9   0 1476.78   62.57
   0 -11  -9 1428.49   67.44
   0 -11   9 1408.66   68.08
   9   0 -11 1460.86   68.72
   0  11   9 1509.74   73.32
  -1 -11   9   12.25    1.18
  -9   1 -11   13.26    0.56
 -11   9  -1   13.11    0.82
   1 -11  -9   13.79    0.85
   9  -1 -11   13.17    0.86
  -1  11  -9   17.51    1.10
   1  11   9   13.29    0.97
  11  -9  -1   15.23    1.42
   9  -1 -11   13.35    0.89
   1  11  -9   15.14    1.62
 -11   9   1   14.27    0.86
   1 -11   9   13.09    1.16
  -1  11   9   12.95    1.20
  11   9  -1   12.52    0.42
  11  -9   1   13.07    1.35
  -1  11   9   15.06    1.40
   9   1 -11   13.02    1.24
  -1 -11  -9   12.84    1.13
  -9  -1 -11   13.50    0.66
   9  -2 -11  844.20   35.93
  -9   2 -11  916.67   36.78
  -2  11  -9  829.79   34.71
 -11   9  -2  900.26   37.93
   2  11   9  851.20   36.78
  11  -9  -2  857.36   36.59
   9   2  11  892.48   36.38
   9  -2 -11  954.34   39.92
   2 -11  -9  864.47   35.48
  -2 -11   9  909.54   39.86
   9   2 -11  874.27   35.64
  -2 -11  -9  873.18   36.07
  -2  11   9  880.62   36.01
  11  -9   2  881.31   37.37
  11   9  -2  872.00   33.45
   2  11  -9  910.26   39.21
 -11   9   2  863.41   35.41
  -2  11   9  898.08   38.24
   2 -11   9  792.95   33.71
  -9  -2 -11  901.88   34.75
  11  -9  -3  796.32   31.89
   3  11   9  808.02   34.23
 -11   9  -3  823.71   33.02
  -3  11  -9  776.15   33.26
   3 -11  -9  778.64   32.62
   9  -3 -11  761.20   30.70
   9  -3 -11  847.68   34.91
  -3 -11   9  810.29   33.31
  -9   3 -11  810.42   32.42
   9   3  11  783.60   30.87
  -3 -11  -9  806.84   31.44
   3 -11   9  792.32   32.61
  -3  11   9  800.43   32.27
  -9  -3 -11  797.80   29.72
  -9  -3 -11  805.76   29.58
  11   9  -3  820.57   31.19
  11  -9   3  800.34   31.98
 -11   9   3  802.50   33.46
   3  11  -9  844.73   35.55
  -3  11   9  794.21   33.47
   9   3 -11  817.60   34.21
   4 -11  -9  568.53   21.16
  11  -9  -4  583.00   22.59
 -11   9  -4  556.44   21.67
   9  -4 -11  552.99   21.67
   4  11   9  552.92   20.85
  -9   4 -11  562.07   20.33
   9  -4 -11  590.52   22.49
   9   4  11  562.59   21.20
  -4  11  -9  579.08   21.69
  -4  11   9  556.98   20.84
  11  -9   4  532.25   19.80
  11   9  -4  549.45   19.53
  -4 -11  -9  578.53   20.92
   4  11  -9  558.64   21.02
  -9  -4 -11  553.84   18.71
  -9  -4 -11  592.81   19.80
 -11   9   4  577.19   21.37
  -4  11   9  568.30   21.12
   4 -11   9  534.16   20.69
   9   4 -11  555.03   21.90
  -9   5 -11   18.66    1.20
   9  -5 -11   20.13    0.93
   9  -5 -11   19.16    1.06
   5 -11  -9   19.22    1.12
  -5  11  -9   19.86    1.17
   9   5  11   19.95    0.87
   5  11   9   19.59    1.74
  11  -9  -5   19.20    1.52
 -11   9  -5   19.06    1.40
  -9  -5 -11   18.47    0.57
  -5 -11  -9   19.36    0.67
  -5  11   9   19.69    1.09
   9   5 -11   18.50    1.51
  11  -9   5   19.87    1.42
   5 -11   9   19.65    1.28
   5  11  -9   20.40    1.04
  -5  11   9   22.56    1.36
 -11   9   5   19.36    1.48
  -9  -5 -11   19.25    0.59
  11   9  -5   21.44    0.91
   6 -11  -9    1.60    0.52
  11  -9  -6    2.64    0.74
  -9   6 -11    1.91    0.37
   9  -6 -11    1.55    0.37
  -6  11  -9    2.39    0.82
   9   6  11    1.11    0.63
 -11   9  -6    1.44    0.40
   9  -6 -11    1.16    0.78
   6  11   9    1.09    0.82
 -11   9   6    1.27    0.44
  11  -9   6    1.46    0.67
  -6 -11  -9    1.38    0.32
  -6  11   9    4.00    0.49
   6  11  -9    1.48    0.70
  11   9  -6    2.29    0.42
   6 -11   9    1.27    0.93
  -9  -6 -11    1.03    0.20
   9  -6  11    1.98    0.69
   7 -11  -9   84.19    3.75
  -7  11  -9   75.06    1.95
 -11   9  -7   84.56    2.74
  -7  11  -9   82.87    3.66
   9  -7 -11   78.42    3.62
  11   9   7   82.82    2.78
   9  -7 -11   83.28    3.04
  11  -9  -7   80.91    2.85
   7  11   9   81.23    2.87
  -9   7 -11   81.60    3.13
   9   7  11   84.63    2.73
  11  -9   7   84.84    2.74
  11   9  -7   86.61    2.82
   7 -11   9   79.53    2.99
  -7  11   9   80.77    3.61
   9   7 -11   88.25    3.48
   9  -7  11   84.30    2.81
 -11   9   7   81.57    2.78
   7  11  -9   78.13    3.23
  -7 -11  -9   79.97    2.21
   8  11   9  398.48   15.62
  -9   8 -11  418.87   14.84
   9  -8 -11  408.56   14.77
 -11   9  -8  418.37   15.63
  11  -9  -8  404.00   15.50
  11   9   8  427.15   15.10
   9   8  11  410.97   14.60
   9  -8 -11  393.20   14.17
  -8  11  -9  411.09   15.84
   8 -11  -9  397.13   14.36
  11   9  -8  423.77   14.96
  11  -9   8  399.56   14.23
   9  -8  11  407.84   15.75
   9   8 -11  401.93   15.13
  -8  11   9  408.16   14.76
   8 -11   9  397.61   14.67
   8  11  -9  395.60   14.00
   9  11   9   80.08    2.94
   9   9  11   81.03    3.52
   9  -9 -11   73.96    2.73
 -11   9  -9   86.36    2.79
  -9  11  -9   82.78    3.59
  -9   9 -11   85.95    3.46
   9 -11  -9   79.08    3.77
  11  -9  -9   77.43    2.79
  11   9   9   78.13    3.42
  11   9  -9   78.25    2.91
   9  -9  11   83.86    3.71
  11  -9   9   85.71    2.86
   9 -11   9   78.43    2.91
   9   9 -11   83.97    3.36
   9  11  -9   76.53    2.52
   9 -10 -11  214.52    8.52
  11   9  10  219.58    8.31
   9  10  11  227.92    8.76
  11  -9 -10  223.86    7.68
  -9  10 -11  239.66    8.78
  10  11   9  239.88    8.14
  10 -11  -9  226.98    8.86
 -10  11  -9  234.37    8.71
 -11   9 -10  251.26    8.89
  11  -9  10  215.30    7.36
   9 -10  11  220.28    7.72
  10  11  -9  221.79    7.83
   9  10 -11  227.18    8.32
  11   9 -10  234.31    8.16
  10 -11   9  224.46    7.75
   0  11 -10  587.73   23.33
  11  10   0  474.23   15.10
  11 -10   0  554.54   21.57
   0 -11 -10  547.85   20.78
 -11  10   0  546.86   21.26
   0 -11  10  571.50   23.19
 -10   0 -11  535.09   18.62
  10   0 -11  576.43   21.75
   0  11  10  565.56   20.88
  10  -1 -11   56.10    2.48
 -11  10  -1   52.27    1.89
  -1 -11  10   53.96    2.32
  11 -10  -1   50.45    2.56
 -10   1 -11   52.91    1.67
   1  11  10   68.03    2.92
  -1  11 -10   52.10    2.91
  10  -1 -11   53.25    1.86
   1 -11 -10   50.09    1.76
   1 -11  10   53.68    3.35
  11  10  -1   51.88    1.27
 -10  -1 -11   51.14    1.25
  10   1 -11   52.39    2.34
   1  11 -10   57.01    3.01
 -11  10   1   55.58    1.98
  11 -10   1   54.05    1.96
  -1  11  10   53.58    2.65
  -1 -11 -10   52.35    1.74
  10   2  11  506.58   18.21
 -10   2 -11  536.39   18.28
  10  -2 -11  541.92   20.33
  11 -10  -2  515.62   18.82
   2 -11 -10  505.67   19.45
 -11  10  -2  515.76   19.81
  -2  11 -10  514.48   19.04
   2  11  10  518.77   19.04
  10  -2 -11  520.02   19.70
  11  10  -2  477.55   16.12
 -10  -2 -11  486.84   15.92
 -11  10   2  523.24   19.08
   2 -11  10  479.06   20.00
  10   2 -11  513.63   18.45
  -2  11  10  490.46   19.34
 -10  -2 -11  511.21   16.99
  -2 -11 -10  508.91   18.03
   2  11 -10  511.07   20.30
  11 -10   2  484.48   17.80
 -10   3 -11   63.84    2.13
  10   3  11   60.00    2.15
   3  11  10   61.66    2.29
 -11  10  -3   65.16    2.20
  10  -3 -11   61.25    2.79
   3 -11 -10   65.43    2.91
  -3  11 -10   62.28    3.14
  11 -10  -3   64.06    2.95
  10  -3 -11   64.35    2.63
  -3  11  10   73.00    2.99
 -10  -3 -11   61.49    1.52
 -11  10   3   62.95    2.85
  11  10  -3   62.19    1.74
  10   3 -11   65.97    2.88
   3  11 -10   64.82    3.13
   3 -11  10   61.06    3.44
  11 -10   3   62.87    2.18
  -3 -11 -10   64.62    1.87
  10   3 -11   63.75    2.03
 -10  -3 -11   60.50    1.46
  -4  11 -10  106.40    3.66
 -11  10  -4  113.54    3.58
   4 -11 -10  109.67    4.27
   4  11  10  103.14    3.55
 -10   4 -11  109.01    3.48
  10  -4 -11  108.70    3.84
  10  -4 -11  104.49    3.40
  11 -10  -4  102.28    4.18
  10   4  11  100.75    3.48
   4 -11  10  104.25    4.80
  11  10  -4  104.19    3.03
  -4 -11 -10  109.35    3.35
 -11  10   4  106.46    3.47
 -10  -4 -11  105.86    2.49
   4  11 -10  109.69    3.64
  -4  11  10  113.74    3.57
  10   4 -11  108.28    4.19
  11 -10   4  103.71    4.14
 -10  -4 -11   98.99    2.36
  10  -5 -11  238.90    8.06
  10  -5 -11  221.98    8.19
   5  11  10  227.84    7.63
   5 -11 -10  227.23    8.52
 -10   5 -11  245.73    7.98
 -11  10  -5  245.95    8.00
  -5  11 -10  223.58    8.54
  10   5  11  229.34    7.78
  11 -10  -5  228.88    8.48
 -11  10   5  231.92    8.45
  10   5 -11  231.98    8.37
  11  10  -5  242.20    7.06
   5  11 -10  223.43    7.46
   5 -11  10  217.68    7.73
  11 -10   5  237.69    8.47
  -5 -11 -10  232.85    7.17
   6  11  10    9.21    0.88
  10   6  11   10.48    0.69
  10  -6 -11    9.94    1.25
  10  -6 -11   10.05    0.63
 -10   6 -11   10.20    0.62
  11 -10  -6   10.73    1.27
  -6  11 -10   10.51    0.55
   6 -11 -10   10.17    0.89
  -6  11 -10   11.46    1.32
 -11  10  -6   11.01    0.78
  11  10  -6   10.49    0.74
   6 -11  10   11.67    1.54
  10  -6  11   10.50    0.71
  10   6 -11   15.12    1.16
   6  11 -10   10.11    1.19
  11 -10   6   10.50    1.20
 -11  10   6   10.57    0.80
  -6 -11 -10   10.22    0.60
  11  10   7    2.06    0.51
  11 -10  -7    1.87    0.52
  10  -7 -11    2.98    0.37
  10   7  11    2.21    0.44
  -7  11 -10    2.28    0.53
 -11  10  -7    2.36    0.47
 -10   7 -11    2.94    0.41
  10  -7 -11    2.19    0.53
   7  11  10    1.86    0.87
   7 -11 -10    1.67    0.89
  10  -7  11    3.62    0.47
 -11  10   7    2.77    0.79
   7 -11  10    3.60    0.62
  10   7 -11    1.61    0.69
  11 -10   7    1.72    0.76
  11  10  -7    1.29    0.48
  -7 -11 -10    1.17    0.31
   7  11 -10    1.84    0.73
  11 -10  -8    7.24    1.18
 -10   8 -11    7.54    0.97
  11  10   8    8.53    1.18
  10  -8 -11    6.80    0.80
  10   8  11    7.19    0.67
  10  -8 -11    7.30    0.78
  -8  11 -10    7.52    0.77
 -11  10  -8    8.64    1.04
   8 -11 -10    7.11    0.83
   8  11  10    6.57    0.79
   8  11 -10    7.41    0.67
  10   8 -11   13.21    1.03
  11 -10   8    7.72    1.10
   8 -11  10    7.15    1.30
  10  -8  11    8.24    0.71
  11  10  -8    8.02    0.76
   9 -11 -10  487.82   19.96
  10  -9 -11  515.98   19.65
  11  10   9  529.88   21.19
  10   9  11  522.02   19.69
   9  11  10  501.28   19.16
  -9  11 -10  540.46   20.44
 -11  10  -9  520.55   19.64
 -10   9 -11  513.55   20.39
  11 -10  -9  497.05   18.95
  10  -9  11  533.83   21.42
   9 -11  10  521.45   21.44
  10   9 -11  525.43   20.49
  11  10  -9  524.46   19.98
  11 -10   9  511.53   20.60
   9  11 -10  534.07   19.91
  11  10  10  220.47    7.68
 -11  10 -10  225.85    8.56
  11 -10 -10  219.76    7.78
 -10  10 -11  234.94    7.95
  10  10  11  207.96    8.58
  10 -10 -11  214.61    7.59
 -10  11 -10  237.52    9.07
  10  11  10  231.67    9.24
  10 -11 -10  208.62    7.48
  11 -10  10  228.46    8.83
  11  10 -10  232.73    8.23
  10 -10  11  218.79    7.71
  10 -11  10  223.73    8.89
  10  11 -10  228.57    8.22
  10  10 -11  216.89    8.15
   0  11 -11  456.65   18.18
 -11   0 -11  445.52   14.73
  11 -11   0  452.28   17.50
   0  11  11  455.23   16.53
 -11  11   0  443.07   16.16
   0 -11 -11  456.44   16.16
  11   0 -11  463.36   17.28
   0 -11  11  460.10   17.28
   1 -11 -11  128.37    4.70
 -11   1 -11  122.60    3.48
  11  -1 -11  133.93    4.81
  -1  11 -11  134.26    4.57
  11 -11  -1  127.76    4.21
   1  11  11  128.13    5.11
 -11  11  -1  128.18    4.20
  11  -1 -11  126.99    3.99
  11 -11   1  122.50    4.04
  -1 -11 -11  122.09    4.29
 -11  -1 -11  128.00    3.33
  11   1 -11  124.90    4.54
   1  11 -11  134.10    5.59
 -11  11   1  130.75    5.09
  -1  11  11  126.97    4.19
   1 -11  11  120.61    4.48
  11 -11  -2 1034.06   45.96
   2  11  11 1018.03   45.66
  -2  11 -11  962.39   42.03
 -11  11  -2 1084.67   48.12
  11  -2 -11 1031.52   44.19
  11  -2 -11 1071.55   46.85
 -11   2 -11 1050.23   43.72
   2 -11 -11 1005.65   44.63
  11   2  11 1000.09   41.98
  11 -11   2 1055.16   45.35
  11   2 -11 1041.16   45.49
   2  11 -11 1056.60   47.58
  -2  11  11 1023.25   45.86
  11   2 -11 1051.50   44.94
   2 -11  11 1023.78   45.12
 -11  -2 -11  940.60   37.72
  11  11  -2  965.04   39.63
  -2 -11 -11  977.83   42.72
 -11  11   2 1059.55   45.79
  11   3  11   69.68    2.41
  11 -11  -3   71.13    2.53
  11  -3 -11   76.86    2.85
 -11  11  -3   81.48    3.26
  11  -3 -11   77.10    3.14
  -3  11 -11   75.43    3.51
 -11   3 -11   74.55    2.37
   3 -11 -11   74.04    3.23
   3  11  11   73.12    2.60
 -11  11   3   76.13    2.60
  11   3 -11   75.32    2.34
  11 -11   3   71.65    2.50
  -3 -11 -11   74.94    2.53
   3  11 -11   75.04    3.40
  11   3 -11   80.65    3.25
  11  11  -3   72.85    2.08
  -3  11  11   78.89    3.30
   3 -11  11   70.98    2.93
 -11   4 -11  230.30    6.85
   4 -11 -11  204.24    7.71
  11 -11  -4  204.23    6.81
  -4  11 -11  221.24    7.42
 -11  11  -4  227.82    8.18
  11  -4 -11  214.15    7.76
  11   4  11  208.76    6.88
  11  -4 -11  214.61    7.26
   4  11  11  211.47    7.10
  11   4 -11  220.26    6.90
  11 -11   4  224.72    8.11
   4  11 -11  200.84    6.85
   4 -11  11  222.13    7.74
  11  11  -4  199.09    5.78
  -4 -11 -11  219.50    6.51
  11   4 -11  220.31    7.81
 -11  11   4  210.11    7.86
  11   5  11  297.06   10.16
  11 -11  -5  278.72    9.55
  -5  11 -11  300.71   11.21
  11  -5 -11  285.24   10.50
 -11   5 -11  293.52    9.44
   5 -11 -11  295.27   11.01
  11  -5 -11  287.25    9.93
 -11  11  -5  307.97   11.17
   5  11  11  280.94   10.66
  -5 -11 -11  291.00    8.95
 -11  11   5  287.25    9.86
  11  11  -5  296.56    9.53
   5  11 -11  298.80   11.06
  11 -11   5  290.95   10.75
  11   5 -11  286.19   10.38
   5 -11  11  286.29   11.47
   6 -11 -11   51.48    2.02
  -6  11 -11   52.11    1.32
 -11  11  -6   53.26    2.48
  11  -6 -11   49.03    1.96
   6  11  11   50.03    2.65
  11   6  11   48.45    1.64
 -11   6 -11   52.40    1.63
  11 -11  -6   48.25    2.61
  11  -6 -11   49.44    1.88
  -6  11 -11   47.50    2.57
  11   6 -11   56.28    1.85
 -11  11   6   50.54    1.93
  11  -6  11   52.10    1.72
  11 -11   6   51.10    2.48
  11  11  -6   48.64    1.43
  -6 -11 -11   50.83    1.57
   6 -11  11   47.81    2.11
   6  11 -11   52.74    1.92
  -7  11 -11  696.15   27.99
  11   7  11  701.97   27.63
  11  -7 -11  671.65   26.82
  11  -7 -11  700.61   27.14
   7 -11 -11  715.70   29.79
   7  11  11  702.68   28.14
  11 -11  -7  696.34   27.70
 -11  11  -7  708.17   29.57
  11  11   7  693.63   27.90
 -11   7 -11  701.29   27.72
   7  11 -11  718.88   29.56
  11   7 -11  702.41   27.68
  11  -7  11  731.03   29.83
  11 -11   7  708.23   29.23
   7 -11  11  716.41   30.37
  -7 -11 -11  657.96   24.73
 -11  11   7  688.60   28.93
  11  11  -7  678.93   26.99
  11  -8 -11   48.66    1.98
  11  -8 -11   50.52    1.95
  11   8  11   52.35    1.87
  -8  11 -11   51.94    2.01
  11  11   8   53.04    2.77
 -11  11  -8   52.99    1.98
  11 -11  -8   52.30    2.69
   8 -11 -11   51.13    2.06
   8  11  11   47.58    2.73
  11   8 -11   52.88    1.81
   8 -11  11   52.63    2.12
  11  11  -8   52.78    1.68
  11  -8  11   51.46    1.90
  11 -11   8   54.24    2.02
 -11  11   8   53.36    2.05
   8  11 -11   52.94    2.49
  11  -9 -11   24.02    1.29
  11  11   9   26.03    1.35
 -11  11  -9   27.05    1.77
   9  11  11   24.27    1.33
  -9  11 -11   24.34    1.25
  11 -11  -9   22.59    1.32
   9 -11 -11   24.42    1.93
  11   9  11   24.73    1.22
 -11   9 -11   26.56    1.14
   9 -11  11   23.50    1.36
  11   9 -11   27.25    1.13
   9  11 -11   23.23    1.61
  11 -11   9   23.37    1.27
  11  -9  11   34.58    1.39
  11  11  -9   25.22    1.35
  10 -11 -11  122.53    5.35
 -10  11 -11  121.20    4.18
  11  11  10  132.25    5.50
 -11  10 -11  133.80    5.07
 -11  11 -10  132.01    5.18
  11 -11 -10  122.92    4.46
  10  11  11  121.45    4.39
  11  10  11  120.36    5.14
  11 -10 -11  113.30    4.19
  10 -11  11  125.00    4.43
  11 -11  10  128.37    5.23
  11 -10  11  119.82    4.24
  10  11 -11  120.32    4.66
  11  10 -11  117.21    3.87
  11  11 -10  118.29    4.39
  11  11  11 1456.73   73.08
 -11  11 -11 1514.90   77.29
  11 -11 -11 1400.34   70.00
  11 -11  11 1551.97   78.97
  11  11 -11 1541.41   75.92
   0   0 -12 2309.48  121.49
   0 -12   0 2378.85  125.43
  12   0   0 2345.99  118.83
   0  12   0 2296.93  121.74
   0   0 -12 2182.72  117.50
   1  12   0  502.12   18.29
   0   1 -12  520.60   19.19
   1 -12   0  495.18   18.29
  12   0   1  523.66   16.38
   0  -1 -12  509.45   17.70
  12   0  -1  535.65   17.29
   0   1 -12  487.99   17.85
  -1 -12   0  524.41   18.05
  -1  12   0  491.01   18.24
   2 -12   0  673.34   26.06
  -2 -12   0  687.41   25.30
  12   0  -2  671.49   23.81
  12   0   2  683.55   22.87
   0   2 -12  633.08   24.99
   0  -2 -12  727.36   27.84
   2  12   0  656.91   24.44
  -2  12   0  685.94   26.60
   0   2 -12  665.00   24.53
   0  -3 -12   72.05    2.32
  12   0   3   69.42    1.57
   3 -12   0   65.59    2.94
   0   3 -12   69.75    2.34
   3  12   0   67.52    2.50
  -3  12   0   69.22    2.90
   0   3 -12   73.47    2.66
  12   0  -3   73.12    2.04
   0  -3 -12   73.26    2.16
  -3 -12   0   75.95    2.67
 -12   0  -3   70.01    1.43
  12   0   4  110.34    2.72
  -4 -12   0  115.24    3.25
  -4  12   0  114.95    4.35
 -12   0  -4  118.09    2.58
   4 -12   0  113.85    3.59
   0  -4 -12  120.89    4.02
  12   0  -4  119.65    3.06
  12   0   4  115.63    2.48
   0  -4 -12  118.62    3.67
   0   4 -12  108.73    3.45
   4  12   0  111.59    3.62
   0  -5 -12  477.96   16.30
  12   0  -5  459.80   15.07
   5  12   0  438.63   15.46
  -5  12   0  441.00   16.73
  -5 -12   0  494.74   16.44
 -12   0  -5  461.21   13.46
   5 -12   0  449.66   17.08
  12   0   5  440.28   13.93
  -5  12   0  448.50   14.96
   0  -5 -12  485.67   18.13
   0   5 -12  445.02   15.61
   0  -6 -12   64.05    2.35
  -6  12   0   58.38    2.16
   0  -6 -12   59.97    2.46
  -6  12   0   65.86    1.79
   0   6 -12   65.19    3.02
  12   0   6   56.67    1.52
   6  12   0   58.04    1.63
  12   0  -6   60.39    1.68
 -12   0  -6   58.16    1.20
  -6 -12   0   61.75    2.14
   6 -12   0   57.82    2.19
 -12   0  -7 1288.60   52.88
   7 -12   0 1231.07   56.12
  12   0  -7 1269.93   56.40
   0   7 -12 1259.26   57.09
   0  -7 -12 1268.98   58.53
  12   0   7 1228.16   52.34
   0   7  12 1348.96   62.91
  -7  12   0 1274.93   58.06
  -7 -12   0 1270.59   55.98
   7  12   0 1337.46   59.30
  -7  12   0 1330.47   57.36
   8  12   0  995.49   40.16
   8 -12   0  974.47   41.88
  -8  12   0 1035.57   46.05
   0  -8 -12 1027.35   43.29
   0   8  12 1026.56   43.82
  -8 -12   0 1053.36   43.15
  12   0  -8 1024.16   42.67
 -12   0  -8  948.90   37.23
  -8  12   0  945.86   37.49
  12   0   8 1058.96   42.48
   0   8 -12  976.40   41.78
   9 -12   0  139.80    4.60
  -9  12   0  148.56    4.82
  12   0   9  132.10    3.61
  12   0  -9  137.97    4.10
   0   9  12  139.88    4.57
   0  -9 -12  138.10    4.23
   0   9 -12  132.18    4.46
 -12   0  -9  142.45    3.52
  -9 -12   0  134.63    3.49
   9  12   0  125.86    3.55
   0 -10 -12  574.76   21.31
 -10  12   0  581.93   23.32
   0  10 -12  621.31   24.76
  10 -12   0  562.41   21.37
  12   0 -10  592.33   21.74
  10  12   0  511.00   17.42
 -12   0 -10  579.35   19.69
   0  10  12  577.04   21.89
   0  11 -12  714.02   28.43
   0  11  12  669.79   27.88
  12   0 -11  682.20   27.44
 -11  12   0  666.68   26.58
  11 -12   0  699.70   28.66
   0 -11 -12  653.85   25.62
  12  -1   0  263.85    7.05
   1   0 -12  246.66    7.74
   0  12   1  248.32    8.29
  12   1   0  257.18    6.67
   0 -12  -1  239.23    7.36
   0 -12   1  234.29    8.05
  -1   0 -12  232.49    7.29
   0  12  -1  246.35    8.37
   1   0 -12  263.63    8.72
  -1   0 -12  248.21    7.49
  -1   1 -12    3.89    0.69
   1  12   1    3.00    0.43
  -1 -12   1    3.84    0.46
   1 -12  -1    3.84    0.78
  -1  12  -1    4.27    0.81
  -1   1 -12    6.42    0.52
  12   1   1    4.14    0.19
   1  -1 -12    3.43    0.49
  12  -1  -1    2.73    0.37
 -12   1  -1    3.52    0.27
  -1  -1 -12    5.13    0.78
  -1 -12  -1    5.84    0.75
  -1  12   1    4.48    0.49
   1 -12   1    3.71    0.52
   1  12  -1    3.51    0.47
  -1  -1 -12    3.36    0.46
   1   1 -12    3.90    0.76
  12  -1   1    3.15    0.21
  12   1  -1    3.46    0.29
   1  -2 -12  748.15   29.08
  12   1   2  739.64   23.82
  -1   2 -12  675.61   25.70
   2 -12  -1  700.08   27.60
   2  12   1  712.84   27.48
 -12   1  -2  683.12   23.60
   1  -2 -12  717.81   26.96
  -1   2 -12  696.04   25.95
  12  -1  -2  717.85   26.13
  -2  12  -1  718.19   28.37
  -2 -12   1  707.31   26.55
   2  12  -1  684.93   26.73
  -2  12   1  698.98   27.61
   1   2 -12  737.31   27.56
  12   1  -2  740.51   25.87
  12  -1   2  691.07   24.36
  -2 -12  -1  706.08   27.29
   2 -12   1  693.72   27.56
  -1  -2 -12  780.20   30.03
   1   2 -12  690.05   26.25
   3  12   1  387.96   13.57
   3 -12  -1  429.74   14.47
  -3 -12   1  415.19   14.48
  -3  12  -1  402.95   14.73
  -1   3 -12  403.45   13.62
  -1   3 -12  406.56   14.08
 -12   1  -3  406.74   12.18
   1  -3 -12  412.24   14.49
  12  -1  -3  421.14   13.18
   1  -3 -12  416.64   15.08
   1   3 -12  391.02   14.44
  -1  -3 -12  426.43   14.26
  -3  12   1  417.91   14.99
  -1  -3 -12  424.57   14.58
  12  -1   3  411.42   11.99
  12   1  -3  416.94   12.78
   1   3 -12  430.55   14.32
   3  12  -1  389.27   13.02
  -3 -12  -1  399.71   13.13
   3 -12   1  430.32   15.52
  12  -1   3  406.04   12.24
   1  -4 -12  527.54   18.67
   4  12   1  511.69   18.30
   4 -12  -1  503.44   18.03
 -12   1  -4  512.96   16.30
  12  -1  -4  492.07   17.16
  -4 -12   1  537.79   18.58
  -1   4 -12  491.47   17.51
   1  -4 -12  518.27   18.18
  -1   4 -12  520.08   18.80
  -4  12  -1  497.84   18.97
   4 -12   1  500.84   17.99
  -4  12   1  493.76   18.87
   4  12  -1  493.68   17.97
  -4  12   1  534.16   17.86
  12   1  -4  522.93   17.71
  12  -1   4  524.76   16.38
  -4 -12  -1  559.68   19.71
  -1  -4 -12  536.16   20.03
  -1  -4 -12  527.79   18.29
   1   4 -12  511.57   19.30
  12  -1   4  531.14   16.90
  -1   5 -12   49.02    2.48
  12  -1  -5   49.24    1.74
   5  12   1   47.71    1.38
   1  -5 -12   52.70    1.71
   5 -12  -1   49.18    2.64
 -12   1  -5   48.00    1.14
   1  -5 -12   53.34    2.00
  -5 -12   1   53.23    1.61
  12   1   5   49.72    1.41
  -5  12  -1   50.76    1.89
  -1  -5 -12   52.39    2.08
  -5  12   1   48.94    2.48
  12  -1   5   49.04    1.23
  -5 -12  -1   49.54    1.45
  12   1  -5   53.71    1.70
  -1  -5 -12   49.90    1.91
   5 -12   1   50.31    1.92
   1   5 -12   57.87    2.72
  12  -1   5   50.59    1.16
   5  12  -1   48.72    1.89
  -5  12   1   53.03    1.35
  12   1   6  156.37    4.36
 -12   1  -6  164.06    4.15
  12  -1  -6  159.42    5.06
  -1   6 -12  159.46    5.15
  -6 -12   1  174.12    5.47
  -6  12  -1  161.64    5.30
   1  -6 -12  175.91    6.66
  -6  12  -1  178.20    4.75
   6  12   1  175.04    5.18
   1  -6 -12  176.01    6.01
   1   6  12  170.81    5.37
   6 -12  -1  169.33    6.34
  12  -1   6  159.83    4.14
  12  -1   6  167.82    4.19
  -6  12   1  169.83    4.79
  12   1  -6  169.12    5.10
  -6  12   1  164.72    6.29
   6  12  -1  159.94    5.07
   1   6 -12  160.52    5.20
   6 -12   1  167.22    5.42
  -6 -12  -1  170.71    5.20
  -1  -6 -12  163.32    4.85
  -7  12  -1   16.05    1.63
   7  12   1   13.96    0.53
   1  -7 -12   15.12    0.87
  -7  12  -1   14.86    0.53
 -12   1  -7   14.64    0.52
  -7 -12   1   14.62    0.98
  -1   7 -12   14.91    1.58
  12  -1  -7   15.20    1.06
  12   1   7   12.96    0.66
   1   7  12   14.05    1.01
   7 -12  -1   15.73    1.05
   7  12  -1   14.32    0.61
   1   7 -12   14.20    1.04
  -7  12   1   16.16    1.05
  -1  -7 -12   17.04    1.18
  -7  12   1   14.54    0.63
   7 -12   1   15.46    1.65
  -7 -12  -1   15.84    0.59
  12   1  -7   15.03    0.98
  12  -1   7   14.46    0.50
  -8 -12   1   65.86    1.78
 -12   1  -8   63.44    1.58
  12   1   8   57.88    1.71
  -8  12  -1   64.14    2.36
   1  -8 -12   61.50    2.08
  12  -1  -8   63.93    1.96
   1   8  12   58.81    2.96
   8 -12  -1   60.42    2.30
  -1   8 -12   61.15    2.31
   8  12   1   58.17    1.72
  -8  12  -1   61.71    1.30
   8 -12   1   61.58    3.18
   1   8 -12   63.02    3.23
 -12  -1  -8   61.75    1.17
  12   1  -8   57.26    2.22
   8  12  -1   62.59    1.65
  -8  12   1   59.44    1.48
  -8  12   1   61.23    2.29
  -1  -8 -12   60.24    1.94
  -8 -12  -1   57.81    1.53
  -9  12  -1   43.16    2.35
  12  -1  -9   40.99    1.42
   9 -12  -1   40.03    2.46
   1   9  12   41.98    2.35
  -1   9 -12   38.90    2.39
   1  -9 -12   40.23    1.50
   9  12   1   41.81    1.16
  12   1   9   38.17    1.23
 -12   1  -9   41.38    1.14
  12   1  -9   42.32    1.79
  -9 -12  -1   39.92    1.19
  -1   9  12   41.20    2.30
  -1  -9 -12   39.17    1.85
   1   9 -12   42.10    1.84
   9 -12   1   42.49    2.46
   9  12  -1   38.60    1.03
  -9  12   1   39.00    2.31
 -12  -1  -9   37.14    0.79
  10 -12  -1    1.46    0.49
  -1  10 -12    2.23    0.51
  12  -1 -10    1.43    0.58
 -10  12  -1    1.12    0.74
   1 -10 -12    1.01    0.40
   1  10  12    1.25    0.76
  12   1  10    1.21    0.32
 -12   1 -10    0.80    0.26
  10  12  -1    1.09    0.26
  -1 -10 -12    2.24    0.55
 -10  12   1    1.11    0.48
   1  10 -12    2.41    0.85
  10 -12   1    1.64    0.50
  12   1 -10    0.76    0.35
  -1  10  12    1.99    0.73
  12  -1 -11  148.41    5.18
  -1  11 -12  137.57    4.71
  12  -1 -11  147.53    5.17
   1  11  12  141.83    4.70
 -12   1 -11  141.83    3.73
  11 -12  -1  140.46    4.69
 -11  12  -1  146.71    4.84
   1 -11 -12  141.99    5.11
 -11  12   1  143.65    5.55
  12   1 -11  142.52    4.98
  11 -12   1  146.49    4.77
  -1  11  12  144.08    4.77
  -1 -11 -12  141.62    4.90
   1  11 -12  141.98    4.90
   0 -12  -2  268.12    8.17
  -2   0 -12  243.20    7.57
   0  12  -2  257.48    8.83
   0  12   2  244.48    7.58
  12   2   0  275.75    6.87
   0 -12   2  270.18    9.12
   2   0 -12  274.94    9.15
  12  -2   0  258.93    7.56
 -12   2   0  258.86    7.13
  -2   0 -12  234.75    7.88
   2  -1 -12 1444.53   65.71
 -12   2  -1 1378.56   59.63
  -1  12  -2 1396.41   63.86
  -2   1 -12 1356.30   60.54
  12   2   1 1213.26   47.55
   1 -12  -2 1290.13   57.91
   1  12   2 1307.19   59.62
  12  -2  -1 1372.62   59.38
  -1 -12   2 1375.40   61.49
  -2   1 -12 1323.42   58.88
  -1 -12  -2 1391.02   62.85
  12   2  -1 1372.93   57.52
  -1  12   2 1374.14   62.64
   1  12  -2 1319.82   60.69
   2   1 -12 1369.67   62.89
  -2  -1 -12 1296.77   57.90
 -12   2   1 1306.23   56.68
   1 -12   2 1298.00   58.41
  12  -2   1 1384.60   60.00
  -2  -1 -12 1337.13   60.89
   2   1 -12 1412.42   63.08
  -2  12  -2    8.11    1.06
  -2 -12   2    8.35    0.62
   2  -2 -12    7.69    0.61
  12  -2  -2    8.28    0.59
   2 -12  -2    8.10    0.65
  -2   2 -12    7.08    0.63
   2  12   2    7.89    0.79
  -2   2 -12    7.92    0.81
   2  -2 -12    8.17    0.68
  12  -2   2    7.35    0.48
   2  12  -2    7.84    0.60
  -2  12   2    7.24    0.63
  -2 -12  -2    7.50    0.81
   2 -12   2    7.51    1.06
  -2  -2 -12    7.50    0.98
  12   2  -2    8.95    0.40
   2   2 -12    8.73    1.04
  12  -2   2    7.61    0.22
   2   2 -12    7.08    1.13
  -2   3 -12  150.89    4.61
  -3  12  -2  153.51    5.56
  12  -2  -3  156.90    4.57
  -2   3 -12  147.76    4.22
  -3 -12   2  166.09    5.44
   3  12   2  150.83    4.77
   2  -3 -12  160.44    5.36
   2  -3 -12  161.01    4.90
   3 -12  -2  146.18    4.56
 -12   2  -3  158.93    4.10
  -3  12   2  153.72    5.46
  -3 -12  -2  161.15    4.53
  12  -2   3  164.48    3.55
   3 -12   2  149.11    5.48
  -2  -3 -12  155.98    4.74
   3  12  -2  150.02    5.04
  12  -2   3  164.36    4.07
  -2  -3 -12  153.95    4.39
   2   3 -12  141.07    5.37
  -3  12   2  156.43    4.36
  12   2  -3  162.35    4.25
  -2   4 -12   13.32    0.92
   4  12   2   11.60    0.56
  -4 -12   2   12.93    0.72
  -4  12  -2   14.78    0.91
   2  -4 -12   15.57    1.35
   2  -4 -12   12.46    1.14
 -12   2  -4   12.08    0.49
  -2   4 -12   12.43    1.24
  12  -2  -4   11.91    0.55
   4 -12  -2   13.38    1.34
  -4 -12  -2   14.18    0.90
   2   4 -12   12.58    0.91
  -4  12   2   14.01    1.25
  12  -2   4   13.66    0.58
  12   2  -4   15.63    0.66
  -2  -4 -12   12.59    0.90
  -2  -4 -12   12.78    1.32
  -4  12   2   13.17    0.56
   4 -12   2   13.47    0.90
  12  -2   4   11.74    0.28
   4  12  -2   12.94    0.68
  -2   5 -12  398.46   13.43
  -2   5 -12  377.81   12.80
   2  -5 -12  382.17   12.82
   2  -5 -12  413.96   14.99
  -5  12  -2  377.36   14.13
  -5 -12   2  382.43   12.61
   5 -12  -2  384.08   13.09
  12  -2  -5  381.40   12.77
 -12   2  -5  372.90   11.17
  12   2   5  396.45   12.59
   5  12   2  386.87   12.84
   5  12  -2  373.07   13.03
  -5  12   2  379.48   13.99
  12  -2   5  355.79    9.82
  12  -2   5  391.01   12.09
   5 -12   2  366.35   12.68
  -2  -5 -12  399.10   13.57
  -5  12   2  383.92   12.17
  12  -2   5  363.31   10.02
  12   2  -5  386.79   12.48
   2   5 -12  371.16   12.90
  -5 -12  -2  410.40   13.52
  -6 -12   2  473.53   16.84
  -6  12  -2  458.29   14.70
   2  -6 -12  452.92   15.77
   6  12   2  442.67   14.99
   2  -6 -12  455.00   16.07
  -2   6 -12  415.97   14.82
  -6  12  -2  438.01   15.70
 -12   2  -6  438.65   14.16
   2   6  12  443.46   15.62
   6 -12  -2  447.73   15.86
  12   2   6  448.04   14.86
  12  -2  -6  450.22   15.14
  -6  12   2  472.26   15.82
  12  -2   6  420.08   13.67
   6  12  -2  429.88   15.41
   6 -12   2  425.46   16.63
  12   2  -6  436.65   15.11
  -6 -12  -2  468.00   15.80
  -2  -6 -12  442.42   15.78
   2   6 -12  457.05   16.24
  -6  12   2  439.13   16.83
  -2   7 -12  852.66   37.06
  -7  12  -2  916.62   34.69
 -12   2  -7  872.34   34.11
   2  -7 -12  883.11   36.44
   2   7  12  879.49   37.79
  12  -2  -7  894.80   36.13
   7 -12  -2  877.67   36.34
   7  12   2  935.57   37.00
  12   2   7  890.08   35.53
   2  -7 -12  946.07   39.02
  -7 -12   2  965.23   38.64
  -7  12  -2  921.51   38.27
  -2  -7 -12  884.42   35.93
   2   7 -12  911.90   37.79
  -7  12   2  889.68   38.58
  -7  12   2  910.27   36.09
  -7 -12  -2  914.26   35.58
  12   2  -7  907.15   36.33
   7 -12   2  915.73   39.60
  12  -2   7  873.43   34.03
   7  12  -2  889.35   35.76
  12  -2  -8  402.24   14.56
   2  -8 -12  422.86   14.74
   8  12   2  406.63   13.19
   8 -12  -2  415.69   14.78
 -12   2  -8  403.86   13.13
  -8  12  -2  420.41   12.02
  -8  12  -2  439.79   15.61
  -8 -12   2  437.18   14.40
   2   8  12  415.15   14.71
  12   2   8  407.77   13.14
  12  -2  -8  426.76   14.88
  -2   8 -12  414.21   15.85
   8 -12   2  425.32   15.12
  12   2  -8  421.60   14.17
  -8  12   2  424.22   16.19
  -8 -12  -2  414.47   13.37
   2   8 -12  440.88   16.85
   8  12  -2  419.68   14.32
  -2  -8 -12  435.32   15.35
  -8  12   2  406.07   12.71
  -9  12  -2  408.72   15.81
 -12   2  -9  406.81   12.89
  -2   9 -12  411.62   14.67
  12  -2  -9  396.53   14.55
  12  -2  -9  405.54   13.85
   9 -12  -2  409.12   14.53
   2   9  12  411.60   14.61
   9  12   2  391.83   12.37
   2  -9 -12  406.38   14.26
  12   2   9  383.69   12.96
  -2  -9 -12  406.44   13.86
  -9  12   2  410.69   14.76
   2   9 -12  427.09   15.18
   9 -12   2  430.11   15.18
   9  12  -2  420.71   14.10
  12   2  -9  418.05   14.85
  -9 -12  -2  410.62   12.92
 -10  12  -2  363.09   12.73
  12  -2 -10  365.00   13.21
 -12   2 -10  357.83   11.59
   2  10  12  347.05   13.30
   2 -10 -12  368.10   12.64
  12  -2 -10  358.63   12.03
  12   2  10  330.08   11.16
  10 -12  -2  360.49   13.67
  -2  10 -12  366.76   12.97
  12   2 -10  365.57   12.20
  -2  10  12  368.58   13.86
   2  10 -12  373.09   14.27
  10 -12   2  379.11   14.28
  10  12  -2  354.93   11.52
 -10  12   2  373.80   13.12
  -2 -10 -12  348.11   12.35
  11 -12  -2   77.76    2.71
  -2  11 -12   81.16    3.63
   2  11  12   78.23    3.46
  12  -2 -11   81.68    2.99
  12  -2 -11   80.94    2.65
  12   2  11   80.53    2.46
 -11  12  -2   80.12    2.75
   2 -11 -12   85.06    3.32
 -12   2 -11   81.12    2.11
   2  11 -12   82.50    2.94
  -2  11  12   79.78    3.44
  11 -12   2   78.92    2.76
  12   2 -11   79.59    2.95
  12   2 -11   83.49    2.73
   2 -11  12   80.30    3.07
  -2 -11 -12   80.52    2.81
 -11  12   2   84.16    3.50
  12  -3   0  130.01    3.73
  -3   0 -12  126.30    4.26
   3   0 -12  136.10    4.06
  12   3   0  143.10    2.88
 -12   3   0  128.46    3.56
   0 -12   3  122.07    4.51
  -3   0 -12  121.67    3.54
   0  12   3  120.80    4.15
  12   3   0  128.29    2.54
   0 -12  -3  120.80    3.58
   0  12  -3  124.36    4.57
  -1  12  -3    8.17    1.06
   3  -1 -12    9.13    0.71
  -1 -12   3    7.59    0.68
  -3   1 -12    7.72    0.93
   1  12   3    7.04    0.82
   1 -12  -3    8.38    0.63
  -3   1 -12    8.33    0.84
  12  -3  -1    8.20    0.62
  12   3  -1    8.10    0.29
  -3  -1 -12    7.56    0.88
  -1 -12  -3    7.52    0.87
   3   1 -12    8.86    1.15
  12  -3   1    8.46    0.59
  -1  12   3    8.37    0.61
  -3  -1 -12    8.39    0.92
   1  12  -3    7.62    0.99
  -1  12   3    9.15    0.56
 -12   3   1    9.02    0.57
   1 -12   3    8.12    0.70
   3   1 -12    9.21    1.07
  12  -3   1    7.72    0.15
  -3   2 -12   27.32    1.10
   3  -2 -12   39.51    1.93
   2 -12  -3   27.04    1.16
 -12   3  -2   27.68    0.95
   2  12   3   28.18    1.39
  -3   2 -12   28.30    1.00
  -2 -12   3   30.28    1.21
  12  -3  -2   29.43    0.90
   3  -2 -12   29.41    1.66
  -2  12  -3   27.66    1.25
  12   3  -2   28.66    0.77
 -12   3   2   31.29    1.12
   3   2 -12   27.22    1.30
  -2 -12  -3   31.43    1.46
  -3  -2 -12   28.88    1.49
  12   3  -2   28.69    0.80
  -3  -2 -12   29.41    1.14
   2  12  -3   27.88    1.11
  -2  12   3   29.22    1.04
  12  -3   2   29.81    1.06
  -2  12   3   27.46    1.67
   2 -12   3   27.71    1.87
  -3 -12   3  789.43   31.69
   3  -3 -12  787.72   31.57
  12  -3  -3  778.28   29.98
   3 -12  -3  780.15   30.39
  -3   3 -12  746.69   28.89
  -3  12  -3  774.67   30.44
   3  -3 -12  871.79   34.59
  -3   3 -12  730.02   28.60
   3  12   3  776.67   29.63
 -12   3  -3  718.66   27.11
  12   3  -3  761.08   27.91
  -3  12   3  783.45   30.55
  -3 -12  -3  745.74   29.24
   3   3 -12  798.91   31.34
  -3  -3 -12  779.73   31.32
   3  12  -3  790.67   30.56
  -3  -3 -12  763.46   29.81
  -3  12   3  766.06   29.27
  12  -3   3  780.90   28.59
  12   3  -3  781.34   28.51
   3 -12   3  771.30   31.45
   3  -4 -12  174.10    6.03
   4 -12  -3  174.21    5.47
   4  12   3  184.35    5.51
 -12   3  -4  167.85    4.66
  -4  12  -3  167.33    6.20
  12  -3  -4  165.97    5.19
   3  -4 -12  186.56    6.57
  -3   4 -12  171.60    5.92
  12  -3  -4  168.17    4.59
  -4 -12   3  168.32    5.11
  -3   4 -12  165.95    5.19
   3   4 -12  165.33    5.39
  12  -3   4  176.73    4.93
  12   3  -4  161.63    4.65
  -4  12   3  160.34    5.88
  -4  12   3  178.40    4.99
  12   3  -4  167.53    4.63
  -4 -12  -3  173.64    5.38
   4 -12   3  161.35    6.17
  -3  -4 -12  175.49    5.38
   4  12  -3  177.27    5.83
  -5  12  -3  113.66    3.70
   5  12   3  111.39    3.37
   3   5  12  111.99    3.51
  -5 -12   3  118.94    4.19
  12  -3  -5  109.83    3.60
  -3   5 -12  114.14    3.55
  -3   5 -12  105.21    2.96
  12  -3  -5  107.97    3.02
 -12   3  -5  108.71    2.98
   3  -5 -12  118.59    3.73
   3  -5 -12  116.67    4.34
   5 -12  -3  108.56    4.52
  12   3   5   98.30    2.70
   5  12  -3  110.63    3.84
  12  -3   5  112.11    3.15
   5 -12   3  111.80    3.72
  12   3  -5  114.92    3.25
  12   3  -5  107.83    2.89
  -3  -5 -12  119.71    3.70
  -5 -12  -3  118.19    3.52
   3   5 -12  114.49    3.75
  -5  12   3  106.64    4.33
  -5  12   3  116.51    3.50
  12  -3  -6 1229.40   55.44
  -3   6 -12 1243.84   58.18
   6  12   3 1331.74   57.98
   3  -6 -12 1305.97   60.33
  12  -3  -6 1276.59   57.94
   3  -6 -12 1389.97   62.66
   6 -12  -3 1245.93   58.74
   3   6  12 1276.03   59.20
  12   3   6 1305.98   58.08
  -3   6 -12 1224.07   54.58
  -6 -12   3 1267.73   57.28
  -6  12  -3 1346.87   63.04
 -12   3  -6 1247.07   54.03
  12  -3   6 1310.19   57.53
  -6  12   3 1297.45   58.91
   3   6 -12 1277.18   58.14
  12   3  -6 1227.85   54.28
  12   3  -6 1317.96   57.66
  -3  -6 -12 1367.77   61.45
  -6 -12  -3 1356.47   59.58
  -6  12   3 1327.54   58.54
   6  12  -3 1280.58   58.64
   6 -12   3 1290.40   60.29
 -12   3  -7  165.56    4.82
   3   7  12  171.58    5.50
   3  -7 -12  172.93    6.37
  -7 -12   3  185.74    6.06
  -3   7 -12  163.58    5.37
  12  -3  -7  166.28    5.09
  12  -3  -7  171.55    5.75
   7 -12  -3  164.00    6.56
   3  -7 -12  180.46    6.77
  -7  12  -3  184.02    4.60
  -7  12  -3  180.09    5.88
   7  12   3  180.46    5.10
  12   3   7  170.27    5.15
  -3   7 -12  169.63    4.92
   7  12  -3  169.92    5.56
  -3  -7 -12  183.49    5.78
  -7 -12  -3  173.15    5.00
   3   7 -12  170.83    6.73
  -7  12   3  171.41    5.61
   7 -12   3  163.99    5.51
  12  -3   7  171.66    4.70
  -7  12   3  178.25    5.12
  12   3  -7  163.67    5.17
  12   3  -7  168.38    4.97
   3   8  12    1.13    0.50
  -3   8 -12    1.37    0.82
  -8 -12   3    1.41    0.32
  12  -3  -8    0.82    0.38
   8  12   3    1.53    0.27
  -8  12  -3    1.76    0.86
   8 -12  -3    1.23    0.90
   3  -8 -12    1.44    0.74
  12   3   8    1.24    0.42
 -12   3  -8    2.69    0.35
  12  -3  -8    2.68    0.45
  12   3  -8    1.23    0.57
  12   3  -8    1.18    0.48
   8  12  -3    0.96    0.46
  -3  -8 -12    1.11    0.31
  -8  12   3    2.88    0.86
   8 -12   3    1.20    0.53
   3   8 -12    1.74    0.91
  12  -3   8    3.59    0.39
  -3   9 -12  198.48    7.33
  -9  12  -3  181.66    6.06
   9  12   3  182.00    4.76
   3  -9 -12  180.17    5.84
  12   3   9  179.11    5.53
   9 -12  -3  181.15    6.06
 -12   3  -9  185.22    5.42
   3   9  12  178.67    5.89
  12  -3  -9  183.40    5.89
  12  -3  -9  181.10    6.32
  12   3  -9  181.05    5.62
   9  12  -3  186.51    5.32
  -9  12   3  183.27    7.05
  -3  -9 -12  175.07    5.67
   9 -12   3  176.13    5.88
   3   9 -12  185.41    6.14
  -9 -12  -3  178.36    4.73
  12   3  -9  186.02    5.56
   3  10  12  522.16   19.51
   3 -10 -12  545.24   20.09
  12  -3 -10  507.77   19.57
 -10  12  -3  526.16   19.82
  -3  10 -12  543.42   21.31
 -12   3 -10  504.24   18.05
  12   3  10  511.40   18.66
  12  -3 -10  527.50   19.62
  10 -12  -3  545.64   20.24
  10  12  -3  497.98   17.33
   3 -10  12  542.39   20.73
  12   3 -10  535.96   20.07
  12   3 -10  548.57   20.78
  -3 -10 -12  529.84   18.90
 -10  12   3  515.05   20.53
  10 -12   3  503.60   18.89
   3  10 -12  523.21   20.90
   3 -11 -12   14.93    1.34
  11 -12  -3   15.09    0.97
 -12   3 -11   14.30    0.72
 -11  12  -3   14.08    0.91
  12  -3 -11   16.07    1.04
  12   3  11   14.10    0.80
  12  -3 -11   15.82    0.85
   3  11  12   14.39    1.40
  -3  11 -12   15.63    1.01
  11 -12   3   14.21    1.38
 -11  12   3   15.04    0.93
  12   3 -11   14.53    1.06
   3 -11  12   15.76    1.14
  11  12  -3   14.11    0.63
   3  11 -12   13.66    0.96
  -3 -11 -12   14.46    0.90
  12   3 -11   14.98    0.85
 -12   4   0   90.04    2.66
   0  12  -4   88.98    2.85
  -4   0 -12   88.91    2.59
   0  12   4   88.26    3.15
   0  12   4   84.99    2.61
   0 -12  -4   89.35    3.27
   0 -12   4   96.63    3.75
  12  -4   0   92.64    2.46
   4   0 -12   94.71    2.96
  -4   0 -12   85.53    3.04
  -4   1 -12    2.19    0.60
   4  -1 -12    6.11    0.76
  -1 -12   4    2.87    0.51
   1 -12  -4    1.85    0.45
  -4   1 -12    3.52    0.40
   1  12   4    2.07    0.60
  12  -4  -1    2.21    0.32
  -1  12  -4    2.58    0.51
   4  -1 -12    2.57    0.84
 -12   4  -1    2.87    0.27
  12   4  -1    3.27    0.16
   4   1 -12    2.75    0.83
  -4  -1 -12    6.15    0.62
  -1  12   4    1.82    0.69
  -4  -1 -12    2.06    0.42
  -1 -12  -4    4.54    0.64
   4   1 -12    0.51    0.57
   1 -12   4    2.10    0.53
   1  12  -4    2.20    0.48
  12  -4   1    2.48    0.30
 -12   4   1    1.70    0.44
  -4   2 -12  863.18   35.71
  12  -4  -2  834.40   31.20
   4  -2 -12  924.46   38.58
   2 -12  -4  900.10   37.56
  -4   2 -12  858.80   34.26
  12  -4  -2  906.37   35.72
 -12   4  -2  947.95   37.41
  -2  12  -4  913.02   38.60
   4  -2 -12  998.09   41.35
   2  12   4  898.57   37.05
  -2 -12   4  887.25   36.22
  -4  -2 -12  931.51   38.40
  -2  12   4  866.73   34.96
  12  -4   2  924.42   36.68
  12   4  -2  907.98   33.68
  -2 -12  -4  886.70   36.25
 -12   4   2  911.92   36.76
  -4  -2 -12  920.12   37.44
  -2  12   4  892.18   37.46
   4   2 -12  938.93   39.82
   2 -12   4  894.30   37.86
   2  12  -4  916.45   37.33
  12   4  -2  890.30   33.29
  12  -4  -3  388.38   11.68
  12  -4  -3  392.89   13.32
   3  12   4  383.22   13.16
 -12   4  -3  392.15   12.29
  -3 -12   4  391.97   13.28
  -3  12  -4  409.92   15.10
   4  -3 -12  405.95   14.58
   4  -3 -12  428.67   14.35
   3 -12  -4  403.20   13.61
  -4   3 -12  365.71   12.56
  -4   3 -12  377.40   13.42
  12  -4   3  381.09   12.04
  -3 -12  -4  404.45   13.68
  -3  12   4  404.68   13.17
   3  12  -4  380.20   13.79
  -4  -3 -12  385.99   13.25
   3 -12   4  377.26   14.24
  12   4  -3  371.14   11.47
 -12   4   3  390.74   12.61
   4   3 -12  384.97   13.47
  -3  12   4  380.13   12.98
  -4  -3 -12  380.84   12.85
  12   4  -3  398.82   12.17
  12  -4  -4   10.35    0.48
  -4  12  -4    9.78    0.88
  -4   4 -12   11.40    0.82
  12  -4  -4    9.89    0.88
   4  -4 -12   11.21    0.84
   4  -4 -12   10.68    1.23
  -4 -12   4   10.73    1.24
   4   4  12   10.74    0.74
   4  12   4   10.91    0.55
 -12   4  -4   10.87    0.65
  -4   4 -12   12.01    0.75
   4 -12  -4   11.75    1.35
  -4 -12  -4   11.69    0.56
  -4  12   4   11.08    0.59
   4  12  -4   10.92    0.69
  12   4  -4   10.71    0.62
  -4  12   4   10.60    1.27
   4   4 -12   11.30    0.94
  12  -4   4   11.01    0.51
  -4  -4 -12   11.38    0.76
   4 -12   4   10.32    1.39
  12   4  -4   12.60    0.54
 -12   4  -5    0.56    0.30
  -5  12  -4    0.69    0.66
  -4   5 -12    0.21    0.23
  12  -4  -5    0.40    0.15
  12  -4  -5    0.46    0.28
  -4   5 -12    0.18    0.57
   4  -5 -12    0.99    0.41
  -5 -12   4    0.51    0.56
   4  -5 -12    0.35    0.37
   5 -12  -4    0.67    0.41
   5  12   4    0.51    0.32
   5  12  -4    0.65    0.48
  -5  12   4    1.16    0.65
  12  -4   5    0.24    0.21
  -4  -5 -12    1.12    0.23
  12   4  -5    0.44    0.21
  12   4  -5    0.55    0.28
   4   5 -12    1.06    0.45
   5 -12   4    0.65    0.44
   6  12   4  264.55    7.73
  12  -4  -6  250.47    8.64
  12   4   6  271.49    8.16
   6 -12  -4  258.80    8.68
  -6 -12   4  272.01    9.55
  -4   6 -12  252.68    9.31
  -4   6 -12  258.24    7.79
   4  -6 -12  278.27    9.11
   4   6  12  276.06    9.76
   4  -6 -12  266.46    8.77
  -6  12  -4  274.98    9.19
  12  -4  -6  257.75    7.94
 -12   4  -6  272.32    8.00
   6 -12   4  272.74   10.30
  12   4  -6  266.34    8.57
  -4  -6 -12  265.15    8.02
   4   6 -12  275.37    9.14
   6  12  -4  270.12    8.50
  -6  12   4  275.82    8.78
  12   4  -6  277.33    8.18
  -6  12   4  257.69    8.67
  -6 -12  -4  260.22    8.00
  12  -4   6  269.85    8.52
  -7 -12   4   70.83    2.74
   4  -7 -12   75.78    3.34
  12  -4  -7   64.76    2.62
   7 -12  -4   64.24    2.42
  -4   7 -12   64.62    2.26
   7  12   4   67.91    1.89
  -7  12  -4   72.56    3.39
  12  -4  -7   65.61    2.08
   4  -7 -12   69.73    2.41
   4   7  12   67.38    2.33
  12   4   7   69.44    2.32
  -4   7 -12   64.98    1.81
 -12   4  -7   67.76    1.81
   7  12  -4   69.88    2.10
   4   7 -12   68.89    2.50
  12  -4   7   66.79    1.85
  -7 -12  -4   70.56    1.99
  12   4  -7   64.89    1.94
   7 -12   4   67.95    2.54
  -4  -7 -12   67.87    1.90
  12   4  -7   68.99    1.89
  -7  12   4   71.18    2.14
  -7  12   4   68.03    2.47
   4  -8 -12 1190.12   55.32
  -8  12  -4 1247.31   58.25
  -4   8 -12 1207.12   53.75
   8  12   4 1296.34   54.52
   4  -8 -12 1040.35   47.66
   4   8  12 1208.04   54.35
  12   4   8 1205.75   53.95
  12  -4  -8 1174.95   52.38
   8 -12  -4 1152.72   53.98
 -12   4  -8 1269.74   55.86
  -4   8 -12 1189.36   53.74
  12  -4  -8 1185.86   53.12
  12   4  -8 1208.28   53.59
   8  12  -4 1280.54   56.97
   8 -12   4 1234.18   55.62
  12  -4   8 1186.73   51.78
   4   8 -12 1257.02   58.28
  -8 -12  -4 1254.58   53.13
  12   4  -8 1270.94   56.76
  -4  -8 -12 1236.33   53.84
  -8  12   4 1194.00   54.14
  -4   9 -12   80.35    2.80
  12  -4  -9   81.02    2.63
   4   9  12   80.36    2.79
  12   4   9   83.97    2.73
 -12   4  -9   82.78    2.24
   9 -12  -4   79.41    2.84
   4  -9 -12   80.33    3.51
  -9  12  -4   80.12    2.85
  12  -4  -9   75.12    2.21
  -4   9 -12   83.00    2.61
  12   4  -9   80.44    2.35
   9 -12   4   84.76    2.95
   4  -9  12   80.78    3.10
  12   4  -9   76.86    3.00
  -9  12   4   81.88    2.88
  12  -4   9   77.09    2.59
  -4  -9 -12   80.12    2.27
  -9 -12  -4   82.64    1.97
   4   9 -12   79.35    2.82
   9  12  -4   81.57    2.68
 -10  12  -4   80.22    2.72
  12   4  10   75.66    2.54
  12  -4 -10   74.44    2.46
  -4  10 -12   73.57    2.62
  10 -12  -4   79.80    2.75
   4  10  12   74.83    2.61
 -12   4 -10   80.72    2.50
  12  -4 -10   78.77    2.68
   4 -10 -12   78.42    2.66
  -4 -10 -12   73.48    2.43
   4 -10  12   75.13    2.91
  12   4 -10   79.10    2.74
  10  12  -4   77.30    2.40
   4  10 -12   78.84    2.74
 -10  12   4   78.83    2.70
  12   4 -10   79.31    2.98
  10 -12   4   80.56    2.78
   4 -11 -12   91.71    3.72
 -12   4 -11   94.46    2.59
  -4  11 -12   89.72    3.12
  12  -4 -11   91.37    2.96
 -11  12  -4   90.68    3.09
   4  11  12   92.36    3.87
  11 -12  -4   88.30    3.07
  12  -4 -11   90.44    3.16
  12   4  11   83.99    2.87
  11  12  -4   94.97    2.81
  12   4 -11   92.79    3.25
  11 -12   4   94.27    3.17
   4 -11  12   92.05    4.28
   4  11 -12   94.89    3.90
  -4 -11 -12   89.70    2.87
  12   4 -11   95.76    3.00
 -11  12   4   94.58    3.21
  -5   0 -12  227.40    7.56
   0 -12  -5  241.41    7.38
   0  12  -5  251.55    8.95
   5   0 -12  265.41    8.33
   0 -12   5  231.48    7.55
   0  12   5  242.84    8.34
   0  12   5  240.78    7.41
  12  -5   0  229.21    6.83
 -12   5   0  243.23    7.13
  -5   0 -12  226.39    6.83
  -1 -12   5   45.86    1.78
   1  12   5   46.22    1.47
  -5   1 -12   45.84    1.83
 -12   5  -1   44.61    1.29
   1  12   5   45.73    1.67
  -5   1 -12   42.62    1.83
   1 -12  -5   43.86    1.52
   5  -1 -12   50.02    2.40
  -1  12  -5   44.75    1.75
  12  -5  -1   43.53    1.33
  12   5  -1   48.75    0.91
  12   5  -1   43.86    0.86
  -5  -1 -12   45.28    1.80
  -1 -12  -5   44.56    1.47
  -1  12   5   46.04    2.09
  -1  12   5   46.54    1.59
 -12   5   1   45.64    1.34
  12  -5   1   44.81    1.74
  -5  -1 -12   44.22    1.48
   1 -12   5   43.86    1.77
   1  12  -5   44.57    2.30
   2 -12  -5  116.99    3.60
  12  -5  -2  115.67    3.80
  -2  12  -5  118.63    3.80
  -2 -12   5  115.37    3.73
  12  -5  -2  106.53    2.31
   5  -2 -12  116.53    4.37
 -12   5  -2  116.32    3.51
   2  12   5  114.31    3.80
  -5   2 -12  113.34    3.85
   5  -2 -12  128.16    4.74
  -5   2 -12  114.49    3.18
  12  -5  -2  115.35    3.79
   2  12   5  111.90    4.34
   2  12  -5  116.99    3.62
  -5  -2 -12  112.08    3.62
   2 -12   5  115.01    4.68
   5   2 -12  116.71    4.80
  -2 -12  -5  109.85    3.73
  12   5  -2  119.14    2.78
  -2  12   5  116.75    3.57
 -12   5   2  117.90    3.26
  12  -5   2  119.40    3.68
  -2  12   5  118.60    3.50
  12   5  -2  113.04    2.63
  -3  12  -5   17.99    1.61
  -5   3 -12   16.34    0.70
  12  -5  -3   14.82    0.47
   5  -3 -12   17.05    1.45
   3  12   5   16.40    0.99
  -5   3 -12   15.57    0.81
  -3 -12   5   18.28    1.06
 -12   5  -3   16.07    0.89
   5  -3 -12   18.25    1.00
  12  -5  -3   16.34    1.10
   3 -12  -5   15.91    1.48
   5   3 -12   17.07    1.73
  12  -5   3   16.39    1.00
  -3  12   5   17.23    1.19
  12   5  -3   16.06    0.62
   3 -12   5   16.81    1.67
  -3 -12  -5   16.41    1.02
 -12   5   3   16.24    1.03
  -5  -3 -12   16.85    1.05
  -3  12   5   19.94    1.42
   3  12  -5   15.96    0.90
  -5  -3 -12   18.03    0.90
  12   5  -3   17.05    0.57
  12  -5  -4   27.15    1.47
 -12   5  -4   26.35    1.16
  -4 -12   5   29.13    1.32
   5  -4 -12   27.92    1.87
  -4  12  -5   26.41    1.37
   5   4  12   27.44    1.13
   4  12   5   30.62    1.25
  12  -5  -4   26.16    0.78
  -5   4 -12   26.51    1.61
  -5   4 -12   30.46    1.31
   4 -12  -5   26.83    1.33
   5  -4 -12   31.46    1.34
  -4  12   5   29.15    1.45
  -5  -4 -12   27.96    0.94
   4  12  -5   27.30    1.66
   5   4 -12   28.37    2.14
  12   5  -4   28.09    0.72
  -4  12   5   27.08    1.84
   4 -12   5   26.57    2.07
 -12   5   4   29.13    1.39
  12   5  -4   27.72    0.75
  -4 -12  -5   27.79    0.94
  -5  -4 -12   27.09    0.86
  12  -5   4   30.36    0.98
 -12   5  -5  819.23   32.07
   5  -5 -12  777.34   31.05
   5  -5 -12  816.31   32.42
   5 -12  -5  769.27   30.92
  -5   5 -12  868.13   33.61
   5   5  12  770.29   30.54
  12  -5  -5  756.50   29.58
   5  12   5  840.73   31.86
  -5   5 -12  759.16   31.32
  -5 -12   5  797.89   33.25
  -5  12  -5  836.41   34.85
  12  -5  -5  735.30   27.74
  -5  -5 -12  762.04   29.78
  -5 -12  -5  813.41   30.72
  12  -5   5  786.01   31.03
  -5  12   5  772.78   31.04
   5   5 -12  816.95   34.21
   5  12  -5  811.88   32.02
   5 -12   5  768.50   30.90
  12   5  -5  814.45   30.38
  12   5  -5  770.56   29.70
  -5  12   5  826.79   32.91
  -5   6 -12   61.38    2.14
   5  -6 -12   66.70    2.38
  12  -5  -6   61.85    1.83
  12  -5  -6   61.75    2.57
  12   5   6   62.29    2.33
  -6 -12   5   68.72    2.96
   5   6  12   61.83    2.83
  -5   6 -12   64.43    2.13
  -6  12  -5   66.15    2.47
 -12   5  -6   61.70    2.11
   6 -12  -5   62.70    2.35
   5  -6 -12   67.82    2.36
   6  12   5   67.92    1.96
  12  -5   6   64.31    2.25
  -6 -12  -5   66.51    2.03
  -6  12   5   64.50    2.26
  12   5  -6   65.60    1.85
   6  12  -5   65.33    2.60
  -6  12   5   65.41    2.37
   6 -12   5   62.08    3.26
  -5  -6 -12   62.86    1.74
   5   6 -12   63.98    2.40
  12   5  -6   65.64    2.03
  12  -5  -7    6.28    0.61
  12  -5  -7    7.57    0.55
   5  -7 -12    8.37    1.20
   7 -12  -5    6.97    0.83
  -5   7 -12   11.10    0.74
   7  12   5    7.24    0.30
   5   7  12    7.34    0.71
  12   5   7    7.42    0.52
 -12   5  -7    7.68    0.68
  -7 -12   5    4.94    0.62
  -5   7 -12    7.51    0.62
   5  -7 -12    7.64    1.18
  -7  12  -5    6.95    1.24
   7  12  -5   10.45    0.86
   5   7 -12    8.66    0.80
  -7 -12  -5    7.41    0.34
  -7  12   5    7.28    1.22
  -5  -7 -12    7.12    0.60
  -7  12   5    8.03    0.61
  12  -5   7    7.72    0.76
  12   5  -7    7.41    0.62
  12   5  -7    8.52    0.75
   7 -12   5    7.30    0.81
  -5   8 -12  109.36    3.62
   8  12   5  107.45    2.74
  12  -5  -8  106.69    3.95
   5  -8 -12  105.38    3.53
  12   5   8  103.20    3.51
   8 -12  -5  105.40    4.50
   5  -8 -12  118.83    4.53
   5   8  12  108.74    3.61
  12  -5  -8  105.87    3.21
  -8  12  -5  112.40    4.63
  -5   8 -12  106.23    3.23
 -12   5  -8  116.42    3.58
  12   5  -8  111.71    3.13
  12   5  -8  104.45    3.11
   5   8 -12  110.87    3.71
  12  -5   8  105.84    3.47
  -8 -12  -5  113.20    2.91
   8 -12   5  107.53    4.59
  -5  -8 -12  106.09    3.21
   8  12  -5  110.58    3.71
  -8  12   5  107.87    4.42
  12  -5  -9  338.92   11.56
 -12   5  -9  372.84   12.07
   5  -9 -12  360.98   12.54
   5   9  12  343.93   12.02
  -9  12  -5  358.66   12.63
   9 -12  -5  357.53   12.51
  12  -5  -9  351.76   11.99
  12   5   9  348.75   12.18
  -5   9 -12  341.13   11.95
  -5   9 -12  354.57   11.31
  -5  -9 -12  338.81   11.29
   9  12  -5  366.05   12.39
  12   5  -9  343.38   11.57
  12  -5   9  373.17   12.83
   9 -12   5  349.65   13.35
  12   5  -9  357.84   12.35
   5  -9  12  356.61   13.99
  -9  12   5  359.12   13.64
   5   9 -12  337.35   12.88
   5  10  12   43.13    1.77
 -10  12  -5   43.97    1.72
   5 -10 -12   46.05    2.39
  12   5  10   44.13    1.40
  -5  10 -12   45.27    1.48
 -12   5 -10   46.35    1.68
  10 -12  -5   46.16    2.42
  12  -5 -10   42.03    1.32
  12  -5 -10   40.76    1.60
  -5  10 -12   44.88    1.77
   5 -10  12   43.57    2.71
  12  -5  10   46.06    1.80
 -10  12   5   45.92    2.43
  12   5 -10   43.75    1.53
  10  12  -5   45.02    1.32
  -5 -10 -12   42.41    1.22
   5  10 -12   44.15    1.77
  12   5 -10   47.36    1.81
  10 -12   5   42.53    2.37
   5 -11 -12   64.66    2.34
  12  -5 -11   69.51    2.37
  12  -5 -11   67.45    2.38
 -11  12  -5   68.39    2.39
  -5  11 -12   66.97    2.41
 -12   5 -11   73.25    2.36
  12   5  11   67.34    2.39
  11 -12  -5   62.91    2.30
  -5  11 -12   67.83    2.05
   5  11  12   64.97    3.07
  12   5 -11   68.15    2.22
   5  11 -12   69.08    2.46
  11 -12   5   65.88    2.36
 -11  12   5   68.52    3.05
  11  12  -5   66.05    1.86
  -5 -11 -12   68.18    2.15
  12   5 -11   70.04    2.52
   5 -11  12   69.08    2.66
  12  -6   0  296.77    9.26
   0  12   6  279.43   10.18
  -6   0 -12  297.05    9.92
  -6   0 -12  295.76    9.65
   0 -12   6  283.92    9.65
   0  12  -6  308.33   11.18
   6   0 -12  326.06   10.59
   0 -12  -6  291.93   10.19
 -12   6   0  298.16    9.83
   0  12   6  280.73    9.84
   6   0 -12  294.99    9.54
 -12   6  -1  230.06    7.47
   6  -1 -12  232.08    8.16
   1  12   6  241.28    7.42
  -1  12  -6  233.61    7.70
   6  -1 -12  264.63    8.34
  12  -6  -1  236.74    7.83
  -6   1 -12  234.31    7.00
   1  12   6  229.21    7.40
  -6   1 -12  235.45    7.59
   1 -12  -6  243.66    8.39
  -1 -12   6  235.97    9.00
  -1  12   6  234.68    8.17
  -1 -12  -6  232.96    7.82
  12  -6   1  240.72    7.23
 -12   6   1  228.52    6.95
  -6  -1 -12  234.79    7.40
   1  12  -6  230.77    8.39
  -1  12   6  232.23    8.05
  12   6  -1  235.60    5.61
   1 -12   6  237.23    9.00
  12   6  -1  244.76    5.90
   2  12   6   62.00    2.92
 -12   6  -2   60.94    2.16
   2  12   6   66.04    2.36
  12  -6  -2   60.17    1.88
   6  -2 -12   61.44    2.10
   2 -12  -6   64.60    2.16
  -6   2 -12   63.48    2.18
  -6   2 -12   65.17    2.36
   6  -2 -12   67.69    2.99
  -2 -12   6   67.10    3.26
  -2  12  -6   65.45    2.39
   2 -12   6   63.92    3.19
   2  12  -6   64.85    2.89
  -2  12   6   61.20    2.55
 -12   6   2   65.00    1.90
  -6  -2 -12   60.10    1.71
  12  -6   2   63.55    1.86
  12   6  -2   59.18    1.39
  -2 -12  -6   65.96    1.93
   6   2 -12   60.72    2.33
  12   6  -2   60.53    1.35
  -2  12   6   60.77    2.05
   3  12   6   15.27    0.98
   6  -3 -12   17.55    1.51
  -6   3 -12   15.89    1.16
  -3 -12   6   16.42    1.65
   6   3  12   15.11    0.81
  -6   3 -12   15.21    0.93
   6  -3 -12   14.84    1.42
  12  -6  -3   15.55    0.80
   3  12   6   15.65    1.05
  12  -6  -3   14.11    0.42
  -3  12  -6   15.97    1.66
   3 -12  -6   14.99    1.49
 -12   6  -3   16.07    1.00
  -6  -3 -12   17.32    0.59
   3  12  -6   14.11    0.91
  12   6  -3   15.67    0.55
  -3  12   6   15.07    1.39
  12   6  -3   15.46    0.60
 -12   6   3   15.40    1.10
  -6  -3 -12   16.40    0.65
  12  -6   3   17.27    0.75
  -3  12   6   16.27    0.82
  -3 -12  -6   17.21    0.74
   3 -12   6   16.74    1.73
   6   3 -12   15.92    1.11
   4  12   6 1390.62   62.00
  12  -6  -4 1305.24   60.53
   6   4  12 1317.96   59.90
  -4 -12   6 1380.91   65.66
  -6   4 -12 1301.52   59.07
 -12   6  -4 1372.88   62.80
   6  -4 -12 1278.98   60.16
  -6   4 -12 1342.54   60.65
   4  12   6 1288.72   59.27
   4 -12  -6 1296.45   59.55
   6  -4 -12 1416.63   64.40
  12  -6  -4 1224.84   52.88
  -4  12  -6 1302.39   60.14
  -4  12   6 1398.65   63.44
  12   6  -4 1335.71   58.62
   4  12  -6 1393.28   63.65
  -6  -4 -12 1324.56   59.55
  -4  12   6 1379.02   64.66
  -4 -12  -6 1328.78   59.24
 -12   6   4 1344.23   62.02
  -6  -4 -12 1326.66   59.62
   6   4 -12 1271.13   58.76
  12   6  -4 1361.04   59.90
  12  -6   4 1373.48   61.51
   4 -12   6 1283.28   61.18
   5 -12  -6   20.01    1.20
  12  -6  -5   19.48    0.96
   6  -5 -12   23.46    1.15
   6   5  12   20.84    1.02
  -6   5 -12   20.07    0.98
   5  12   6   22.62    0.94
  12  -6  -5   20.61    0.70
   6  -5 -12   24.32    1.18
  -5 -12   6   21.15    1.15
  -5  12  -6   20.33    1.81
   5  12   6   20.57    1.23
  -6   5 -12   21.15    0.73
   5  12  -6   22.26    1.53
  -5  12   6   21.54    1.15
  -6  -5 -12   23.31    0.91
  12   6  -5   20.04    0.90
  -5 -12  -6   19.82    0.70
  12   6  -5   21.99    0.63
  12  -6   5   19.79    0.85
   5 -12   6   20.05    1.93
 -12   6   5   21.31    0.92
  -6  -5 -12   19.28    1.02
  -5  12   6   22.24    0.89
   6   5 -12   21.76    1.24
  12  -6  -6  237.76    7.64
  -6 -12   6  266.91    9.57
  12  -6  -6  231.16    6.97
  -6   6 -12  271.53    8.44
  -6   6 -12  246.76    8.01
  12   6   6  261.71    8.08
   6 -12  -6  247.11    8.36
   6  -6 -12  258.29    8.41
 -12   6  -6  251.13    8.26
   6   6  12  254.38    9.12
   6  12   6  257.09    7.42
  -6  12  -6  267.58    8.94
   6  -6 -12  246.65    9.28
   6 -12   6  247.50    8.43
  12   6  -6  248.10    7.80
   6   6 -12  244.47    9.28
  -6  12   6  252.33    9.50
   6  12  -6  244.31    8.68
  -6 -12  -6  260.17    7.85
  -6  -6 -12  257.58    7.58
  12  -6   6  256.45    7.88
  -6  12   6  256.58    8.49
  12   6  -6  260.11    7.58
  -6  -6 -12  250.92    7.69
 -12   6  -7  102.16    3.41
  12  -6  -7   95.04    2.53
  12  -6  -7   98.52    3.11
   7  12   6  100.55    2.48
  -6   7 -12  100.58    3.24
  12   6   7  106.18    3.09
  -7  12  -6  105.26    4.39
  -6   7 -12  117.59    3.44
   6  -7 -12  110.88    3.49
   6  -7 -12   98.66    4.15
   7 -12  -6   99.98    3.44
   6   7  12  102.14    3.29
  -7 -12  -6   97.76    2.71
  -6  -7 -12   97.49    2.86
  12   6  -7  102.17    2.76
  -7  12   6   98.24    3.37
  12   6  -7  102.02    3.24
   6   7 -12  102.24    4.21
   7  12  -6  100.49    3.09
  12  -6   7  101.56    2.97
   7 -12   6  109.49    4.57
   6  -8 -12    4.13    0.66
  12   6   8    3.35    0.70
  12  -6  -8    4.20    0.84
   6  -8 -12    4.34    0.56
  -6   8 -12    5.35    0.52
   8 -12  -6    4.47    1.06
  -8  12  -6    5.62    1.00
 -12   6  -8    4.50    0.63
   6   8  12    3.72    0.59
  12  -6  -8    4.54    0.47
  -6   8 -12    3.86    0.58
  -6  -8 -12    3.66    0.28
   8 -12   6    3.80    1.09
  12   6  -8    4.52    0.35
   6   8 -12    4.52    1.01
  12  -6   8    4.26    0.69
   8  12  -6    3.35    0.44
  12   6  -8    4.14    0.63
  -8 -12  -6    4.27    0.32
   6  -8  12    4.27    0.71
  -8  12   6    4.50    0.63
  12  -6  -9  120.93    3.75
   6  -9 -12  129.58    5.09
  12   6   9  123.40    4.23
  -9  12  -6  125.96    5.02
   6   9  12  120.78    4.01
  -6   9 -12  122.37    4.06
   9 -12  -6  129.93    4.30
 -12   6  -9  125.80    4.12
  12  -6  -9  124.40    3.96
  -6   9 -12  138.49    3.71
  -6  -9 -12  117.25    3.44
   9  12  -6  124.36    4.15
  12  -6   9  128.52    3.83
  -9  12   6  122.58    4.13
   6  -9  12  121.09    4.24
   9 -12   6  130.73    5.12
  12   6  -9  126.04    4.20
   6   9 -12  127.33    4.20
   6  10  12   23.13    1.77
  12  -6 -10   24.41    1.13
 -12   6 -10   23.98    1.20
  -6  10 -12   28.59    0.99
  10 -12  -6   23.76    1.85
  12   6  10   24.86    1.33
  -6  10 -12   23.31    1.20
 -10  12  -6   25.16    1.22
   6 -10 -12   23.81    1.24
  12  -6 -10   23.91    1.13
 -10  12   6   24.02    1.26
  12  -6  10   25.26    1.36
  10  12  -6   25.74    1.17
  10 -12   6   23.49    1.78
  -6 -10 -12   23.73    0.74
   6  10 -12   23.14    1.20
   6 -10  12   25.74    1.41
  12   6 -10   26.05    1.02
  -6  11 -12  104.00    2.76
  12  -6 -11  103.34    3.36
  -6  11 -12  107.11    4.26
   6 -11 -12  100.94    3.46
  11 -12  -6  100.82    3.43
  12  -6 -11  102.20    3.00
   6  11  12  104.61    3.53
  12   6  11  105.25    3.18
 -11  12  -6  106.25    3.53
 -12   6 -11  107.57    3.54
  -6 -11 -12  100.84    2.97
 -11  12   6  105.25    3.55
  11 -12   6  108.66    4.26
  12   6 -11  108.62    3.33
   6  11 -12  101.16    4.13
  11  12  -6  109.10    3.34
   6 -11  12  105.55    4.59
  12   6 -11  109.19    3.26
 -12   7   0  939.49   38.63
  -7   0 -12  903.82   36.40
   0  12  -7  989.53   41.24
   0 -12  -7  909.52   37.59
   0 -12   7  970.77   42.68
   0  12   7  909.60   37.92
   7   0 -12  928.12   39.71
  12  -7   0  908.99   37.31
   7   0 -12 1046.55   44.91
   0  12   7  935.79   38.68
   1 -12  -7   39.45    2.10
   1  12   7   39.17    2.27
 -12   7  -1   42.15    1.82
   7  -1 -12   39.76    1.57
  -7   1 -12   38.73    1.21
  12  -7  -1   43.10    2.01
  -1 -12   7   39.06    1.83
  -1  12  -7   41.32    1.70
   7  -1 -12   42.99    1.70
   1  12   7   41.17    1.83
   1  12  -7   39.79    2.44
  -1  12   7   39.70    1.54
  12   7  -1   37.30    0.69
   7   1 -12   42.40    1.56
  -1  12   7   40.46    1.99
  -7  -1 -12   42.78    1.53
  -1 -12  -7   42.27    1.90
   1 -12   7   45.56    2.74
 -12   7   1   39.55    1.38
  12  -7   1   41.26    1.94
  12   7  -1   40.15    0.76
   7  -2 -12  692.66   27.93
   2  12   7  741.17   28.73
  -7   2 -12  652.45   24.27
   2  12   7  714.61   27.67
  -7   2 -12  694.21   26.95
   7  -2 -12  751.20   28.95
  -2  12  -7  724.57   28.35
 -12   7  -2  656.57   26.04
  -2 -12   7  663.75   26.40
  12  -7  -2  679.88   26.96
   2 -12  -7  703.41   27.10
  -7  -2 -12  703.42   26.31
 -12   7   2  663.68   26.45
  -2 -12  -7  715.26   27.81
  12   7  -2  691.41   23.81
  -2  12   7  709.23   27.30
  12  -7   2  719.28   27.10
   2  12  -7  748.05   28.96
   2 -12   7  659.88   26.15
  -2  12   7  723.69   28.90
   7   2 -12  692.75   28.76
  12   7  -2  691.15   24.05
  -3 -12   7  961.31   41.39
   3  12   7  996.58   42.10
   3  12   7  948.14   40.30
 -12   7  -3  975.78   40.65
   7  -3 -12 1066.44   45.99
  -7   3 -12  928.48   38.58
   7   3  12  938.50   40.19
   7  -3 -12  957.53   40.33
  -3  12  -7 1017.82   44.73
   3 -12  -7  972.09   42.25
  12  -7  -3  982.93   42.08
  -7   3 -12 1018.25   42.90
  -3 -12  -7  953.51   40.24
  -3  12   7 1042.38   44.72
 -12   7   3  977.71   40.78
   3 -12   7  942.58   40.32
  -7  -3 -12  996.86   39.82
   3  12  -7  961.93   40.93
  12   7  -3  970.18   38.62
   7   3 -12 1016.04   44.57
  12  -7   3  997.78   41.18
  12   7  -3  957.86   38.01
  -3  12   7 1007.97   43.64
  -7  -3 -12  976.55   39.99
 -12   7  -4   38.20    1.30
  12  -7  -4   34.90    1.35
   4 -12  -7   36.09    2.24
  -4 -12   7   39.22    1.72
   7   4  12   36.92    1.84
   4  12   7   40.61    1.19
   7  -4 -12   37.48    2.16
  -4  12  -7   36.80    1.66
   4  12   7   37.47    1.65
  -7   4 -12   35.77    1.33
  -7   4 -12   38.00    1.80
   7  -4 -12   40.12    2.22
   4 -12   7   36.85    1.72
  -7  -4 -12   37.97    1.34
  12   7  -4   35.44    0.94
  -4  12   7   40.04    1.40
  12  -7   4   40.88    1.84
   7   4 -12   39.14    2.36
  -4 -12  -7   40.91    1.53
 -12   7   4   38.70    1.84
  12   7  -4   35.97    1.05
   4  12  -7   40.02    2.09
  -4  12   7   37.23    2.11
  -7  -4 -12   36.84    1.19
   7  -5 -12   66.32    2.32
   5  12   7   66.92    2.46
  -5  12  -7   67.77    3.29
  12  -7  -5   61.46    1.62
  -7   5 -12   71.60    2.78
  12  -7  -5   65.93    2.20
  -5 -12   7   68.12    2.47
  -7   5 -12   66.54    2.03
   5 -12  -7   65.47    2.36
   7  -5 -12   74.35    3.15
   7   5  12   64.28    2.69
 -12   7  -5   70.22    2.53
   5  12   7   71.33    1.88
   5  12  -7   71.32    2.32
  12  -7   5   68.69    2.57
   7   5 -12   68.24    3.30
  -5  12   7   68.85    2.40
   5 -12   7   70.66    3.51
  -5  12   7   72.45    2.19
  12   7  -5   69.47    2.04
  -7  -5 -12   65.23    1.66
  -7  -5 -12   67.24    2.01
 -12   7   5   67.75    2.16
  -5 -12  -7   67.11    1.82
  -6  12  -7  199.32    6.61
   7   6  12  195.74    6.19
   6 -12  -7  187.73    7.36
   6  12   7  199.22    6.66
   7  -6 -12  211.01    7.36
  12  -7  -6  186.90    6.00
   7  -6 -12  188.15    7.12
  -7   6 -12  198.88    6.88
  12  -7  -6  176.78    4.81
  -7   6 -12  209.12    6.04
 -12   7  -6  189.74    5.82
   6 -12   7  187.89    6.37
  -7  -6 -12  186.21    5.11
   6  12  -7  185.13    6.64
  -6 -12  -7  188.40    5.60
  -7  -6 -12  201.57    5.52
  12   7  -6  195.17    5.57
   7   6 -12  195.53    6.45
  12  -7   6  191.92    5.88
  -6  12   7  193.28    7.28
  -6  12   7  200.69    6.07
   7  12   7  295.09   11.22
   7  -7 -12  304.79   10.25
  -7   7 -12  295.86   10.64
  -7  12  -7  307.91   10.45
   7 -12  -7  298.87   11.22
  -7   7 -12  312.03    9.53
   7  -7 -12  301.91   10.81
 -12   7  -7  298.04    9.61
  12   7   7  301.81    9.79
   7   7  12  292.03   10.61
  12  -7  -7  276.96    9.26
  12  -7  -7  274.18    8.56
  -7 -12  -7  285.59    8.68
  -7  -7 -12  274.91    8.45
  -7  12   7  295.96   10.06
  -7  -7 -12  278.85    8.65
   7  12  -7  279.63    9.26
   7 -12   7  292.72   11.18
  12  -7   7  293.58   10.10
   7   7 -12  285.93    9.73
  12   7  -7  286.88    9.40
   8 -12  -7  180.06    5.99
  12   7   8  182.71    6.34
  -7   8 -12  181.10    5.84
   7   8  12  182.05    6.62
  12  -7  -8  176.40    6.42
   7  -8 -12  193.18    6.70
   8  12   7  175.81    5.94
   7  -8 -12  180.94    6.94
  -7   8 -12  183.16    5.00
  12  -7  -8  167.84    4.79
  -8  12  -7  189.74    6.22
 -12   7  -8  181.88    5.56
   7  -8  12  184.40    6.16
   8 -12   7  183.27    6.13
  12   7  -8  181.23    5.81
  -7  -8 -12  174.90    5.06
  -8  12   7  175.38    6.79
   7   8 -12  179.80    5.88
  12  -7   8  180.52    6.18
   8  12  -7  177.76    5.54
  -7   9 -12  229.38    6.94
  -7   9 -12  252.94    8.43
   9 -12  -7  249.81    9.37
   7  -9 -12  249.57    8.48
   9  12   7  247.14    8.51
   7   9  12  246.45    9.08
  12   7   9  260.39    8.97
 -12   7  -9  253.20    8.09
  12  -7  -9  248.73    7.91
  12  -7  -9  255.41    8.46
  -9  12  -7  259.04    9.59
   9  12  -7  243.43    7.82
  12  -7   9  254.45    8.87
   9 -12   7  253.83    8.56
   7   9 -12  255.97    9.29
   7  -9  12  248.45    9.61
  12   7  -9  250.97    7.92
  -7  -9 -12  244.92    7.40
  -9  12   7  247.32    8.44
 -10  12  -7  222.53    8.25
   7 -10 -12  211.39    8.07
  12  -7 -10  204.08    6.80
  -7  10 -12  206.67    7.76
 -12   7 -10  221.76    7.49
  10 -12  -7  205.40    6.96
   7  10  12  205.87    6.92
  12  -7 -10  205.31    6.21
  12   7  10  216.60    6.91
  10  12   7  211.48    7.23
  10 -12   7  220.64    7.32
  12  -7  10  229.77    7.88
  10  12  -7  212.26    7.06
   7  10 -12  222.40    8.06
 -10  12   7  213.96    7.28
  -7 -10 -12  207.11    6.14
  12   7 -10  219.32    7.41
   7 -10  12  220.41    7.55
  -7  11 -12  249.52    9.28
  12  -7 -11  237.66    8.01
  11 -12  -7  240.10    9.07
   7 -11 -12  239.58    9.07
  11  12   7  237.75    8.25
   7  11  12  237.85    9.06
  12   7  11  235.09    7.69
 -11  12  -7  244.57    9.13
 -12   7 -11  256.65    8.22
  12  -7 -11  232.61    7.28
  12   7 -11  232.32    7.63
  11  12  -7  242.12    7.55
   7 -11  12  229.49    8.20
  11 -12   7  241.14    8.98
 -11  12   7  240.28    8.29
  12  -7  11  237.76    7.83
   7  11 -12  227.96    7.78
   8   0 -12 1909.31   94.70
   0 -12  -8 1620.22   82.08
   8   0 -12 1695.16   83.92
   0 -12   8 1726.50   86.68
   0  12  -8 1825.50   90.84
  12  -8   0 1733.27   85.37
  -8   0 -12 1663.83   81.91
   0  12   8 1739.63   86.05
   0  12   8 1691.68   86.07
 -12   8   0 1761.42   87.01
  12  -8  -1  346.18   11.68
  -1 -12   8  359.70   12.78
   1  12   8  359.80   11.95
  -1  12  -8  357.10   13.86
 -12   8  -1  356.87   12.71
   1  12   8  365.15   12.52
   1 -12  -8  345.61   12.60
   8  -1 -12  382.06   14.09
  -8   1 -12  345.61   11.06
   8  -1 -12  356.08   13.04
  12   8  -1  335.14    8.99
  12  -8   1  352.67   11.76
   8   1 -12  367.75   13.28
  -1  12   8  353.01   11.93
   1  12  -8  352.16   12.30
  12   8  -1  337.80    9.12
  -1  12   8  342.35   12.79
   1 -12   8  339.51   12.25
  -1 -12  -8  360.11   11.87
  -8  -1 -12  349.66   11.38
 -12   8   1  347.34   12.48
  -8   2 -12  515.13   18.16
   8  -2 -12  577.64   22.13
  12  -8  -2  542.84   19.55
   2  12   8  522.51   20.63
 -12   8  -2  525.33   19.05
   8  -2 -12  517.56   18.98
  -2  12  -8  522.86   20.99
  -2 -12   8  515.49   21.21
   2  12   8  531.17   19.01
   2 -12  -8  534.37   19.48
 -12   8   2  527.65   20.06
   2  12  -8  555.01   20.44
   8   2 -12  541.76   21.36
  12   8  -2  504.60   16.36
  -8  -2 -12  536.24   18.61
  12  -8   2  528.26   20.08
  -2  12   8  524.03   20.27
  -2 -12  -8  515.24   19.27
  12   8  -2  524.81   16.83
   2 -12   8  538.74   20.36
   3 -12  -8   10.33    0.80
   3  12   8   10.64    1.32
 -12   8  -3    9.95    0.94
   8  -3 -12    9.72    0.75
   8  -3 -12    9.70    1.20
  -3  12  -8    9.26    0.86
   3  12   8    9.81    0.52
  -8   3 -12    9.09    0.57
  12  -8  -3    8.29    1.07
   8   3  12    9.44    0.59
  -8  -3 -12    8.81    0.35
  12   8  -3    8.87    0.46
  -3 -12  -8    9.75    0.54
   3 -12   8    8.92    0.93
  12  -8   3   10.48    0.67
  -3  12   8    8.47    1.12
  -3  12   8    9.44    1.08
   3  12  -8    8.26    1.25
  -8  -3 -12   10.35    0.56
   8   3 -12    9.00    0.86
 -12   8   3    8.64    0.66
   8  -4 -12  189.24    5.88
  -8   4 -12  171.17    5.02
  -4  12  -8  174.49    6.83
   8  -4 -12  177.35    5.70
   4 -12  -8  178.97    6.58
   8   4  12  167.60    5.13
  12  -8  -4  167.85    5.32
  -8   4 -12  172.96    5.79
  -4 -12   8  173.15    5.84
   4  12   8  171.99    6.63
 -12   8  -4  184.45    5.57
  -4  12   8  170.79    6.35
   4  12  -8  166.45    6.31
  12  -8   4  174.51    6.03
  -4  12   8  179.92    5.57
  -8  -4 -12  173.82    4.89
 -12   8   4  178.57    6.21
  -8  -4 -12  169.24    4.71
   8   4 -12  181.93    5.94
   4 -12   8  171.14    5.85
  12   8  -4  171.28    4.55
  -4 -12  -8  171.85    4.95
  12  -8  -5  853.41   36.40
   8  -5 -12  925.49   38.08
  -8   5 -12  865.68   33.76
  -8   5 -12  906.38   37.96
   5  12   8  923.97   39.66
   8  -5 -12  879.17   36.45
   8   5  12  869.22   35.81
 -12   8  -5  921.58   38.90
   5 -12  -8  909.01   39.06
  -5  12  -8  889.67   37.33
   5 -12   8  837.62   35.44
   8   5 -12  876.77   36.62
  12   8  -5  861.90   34.56
  -5  12   8  895.14   38.67
  12  -8   5  873.29   35.83
   5  12  -8  916.66   37.99
  -5  12   8  934.56   38.41
 -12   8   5  900.01   37.16
  -5 -12  -8  890.16   35.86
  -8  -5 -12  835.58   32.88
  -8  -5 -12  882.46   34.41
   8  -6 -12   97.89    4.09
   6 -12  -8  104.64    3.55
  -8   6 -12  106.92    3.25
   6  12   8  100.38    3.47
   8   6  12  103.72    3.87
   8  -6 -12  109.67    3.40
 -12   8  -6  102.34    3.64
  12  -8  -6   99.47    3.23
  -8   6 -12   97.36    2.68
  -6  12  -8  101.57    4.34
 -12   8   6  106.04    3.34
  -8  -6 -12  100.19    2.52
  -8  -6 -12  101.18    2.69
  12  -8   6  105.65    3.75
  -6  12   8  104.18    3.48
   8   6 -12  104.55    3.44
   6  12  -8  106.48    3.36
  12   8  -6  106.02    3.14
  -6 -12  -8  106.32    3.00
   6 -12   8  100.55    4.56
  12   8   7  562.27   21.42
  -7  12  -8  546.90   21.66
   8   7  12  522.76   19.33
  -8   7 -12  569.76   20.85
   8  -7 -12  512.46   19.21
  12  -8  -7  523.80   19.36
   8  -7 -12  543.38   19.78
 -12   8  -7  539.19   20.56
  -8   7 -12  500.19   17.31
   7  12   8  540.70   20.26
   7 -12  -8  545.52   20.35
  12  -8  -7  478.83   16.31
  -8  -7 -12  512.97   17.54
   7 -12   8  530.89   20.05
  12   8  -7  534.53   19.32
  -7 -12  -8  546.40   18.77
  12  -8   7  538.34   19.65
  -7  12   8  538.02   21.25
  -8  -7 -12  484.41   16.65
   8   7 -12  518.53   19.29
   7  12  -8  537.10   20.63
 -12   8  -8  714.52   29.16
   8  -8 -12  739.71   28.84
  12  -8  -8  656.41   24.74
   8  -8 -12  684.04   28.61
   8  12   8  732.94   29.31
  -8   8 -12  642.54   23.55
  12  -8  -8  699.94   28.89
   8   8  12  729.59   28.90
  12   8   8  747.54   30.33
  -8   8 -12  733.95   30.15
   8 -12  -8  729.91   30.59
  -8  12  -8  749.46   29.93
   8  -8  12  731.60   30.57
   8   8 -12  692.33   28.80
  -8  -8 -12  710.17   25.94
   8  12  -8  719.78   29.42
  -8  12   8  697.06   28.16
  -8  -8 -12  726.91   26.33
  12   8  -8  686.27   27.16
  12  -8   8  724.81   28.55
   8 -12   8  735.22   29.46
   8  -9 -12   87.34    3.92
   9 -12  -8   81.38    2.95
 -12   8  -9   92.48    3.31
   8   9  12   84.59    2.92
  12  -8  -9   86.25    2.96
  -8   9 -12   84.88    2.85
  12   8   9   81.54    3.32
   9  12   8   87.26    3.93
  -9  12  -8   87.82    3.06
  12  -8  -9   85.96    2.63
   9  12  -8   88.99    3.26
  12  -8   9   85.82    3.35
  12   8  -9   88.51    3.03
   8   9 -12   83.94    3.59
  -9  12   8   83.28    3.77
   9 -12   8   89.76    3.15
   8  -9  12   86.85    3.87
  -8  10 -12   73.46    3.19
  10 -12  -8   71.75    3.40
   8 -10 -12   76.90    2.82
  12  -8 -10   69.08    2.49
 -12   8 -10   77.75    2.45
  12   8  10   74.13    2.48
   8  10  12   74.57    3.36
  12  -8 -10   70.94    2.03
 -10  12  -8   75.57    2.69
  10  12   8   72.63    3.50
  10  12  -8   76.15    2.73
   8 -10  12   72.49    3.47
  10 -12   8   72.96    2.66
   8  10 -12   73.67    2.53
  12   8 -10   74.17    2.73
  12  -8  10   76.18    2.97
 -10  12   8   73.15    3.48
  12  -8 -11  221.04    7.49
  12  -8 -11  211.94    7.04
   8 -11 -12  225.34    7.78
  11 -12  -8  219.41    8.43
   8  11  12  224.25    7.69
  -8  11 -12  237.06    8.01
 -12   8 -11  225.64    7.38
  12   8  11  217.53    7.19
 -11  12  -8  237.21    8.03
  11  12   8  229.04    8.82
  12  -8  11  220.83    8.01
   8 -11  12  212.03    7.56
   8  11 -12  213.94    7.27
 -11  12   8  223.71    7.72
  11  12  -8  229.18    7.23
  11 -12   8  226.83    7.70
  12   8 -11  217.60    7.68
   0 -12  -9   49.51    2.19
   9   0 -12   55.65    2.60
  12  -9   0   49.06    1.75
   0 -12   9   48.78    3.08
   9   0 -12   51.00    1.80
   0  12   9   48.74    2.14
   0  12  -9   49.49    2.02
  -9   0 -12   46.77    1.27
   0  12   9   49.93    1.87
 -12   9   0   48.92    2.21
  -1 -12   9   22.57    1.43
   1 -12  -9   20.95    1.01
  -9   1 -12   21.28    0.73
   1  12   9   23.13    0.92
   1  12   9   21.39    1.72
   9  -1 -12   21.03    1.06
  -1  12  -9   21.93    1.30
   9  -1 -12   24.52    1.14
 -12   9  -1   20.74    0.96
  12  -9  -1   22.39    1.05
   1 -12   9   25.45    2.15
  12  -9   1   21.35    1.03
   9   1 -12   20.88    1.50
  -1  12   9   23.73    1.15
 -12   9   1   23.61    1.03
  -1 -12  -9   22.32    1.33
  -1  12   9   20.12    0.95
   1  12  -9   22.82    1.25
  -9  -1 -12   20.75    0.85
   9  -2 -12  786.04   32.38
  -9   2 -12  791.90   31.21
  -2 -12   9  802.78   34.36
  -2  12  -9  770.37   32.85
  12  -9  -2  741.92   30.91
   2  12   9  748.66   30.30
 -12   9  -2  761.10   31.50
   9  -2 -12  832.76   33.08
   2 -12  -9  762.43   31.74
  -9  -2 -12  745.71   28.17
  -2 -12  -9  765.15   30.85
  12  -9   2  757.47   30.06
   9   2 -12  777.27   31.95
  12   9  -2  727.52   26.44
   2  12  -9  751.57   30.50
   2 -12   9  771.95   33.33
  -2  12   9  795.93   31.85
  -2  12   9  761.67   31.60
 -12   9   2  760.37   31.46
   9   2 -12  808.55   33.68
   3  12   9  206.36    6.80
   9  -3 -12  214.03    7.48
  -3  12  -9  189.59    7.43
  -3 -12   9  203.65    8.24
  -9   3 -12  216.08    6.82
 -12   9  -3  204.08    6.42
  12  -9  -3  191.29    6.16
   9  -3 -12  192.69    6.28
   9   3  12  205.09    6.71
   3 -12  -9  209.59    7.57
   3 -12   9  192.45    7.94
  -3  12   9  202.61    6.54
  -9  -3 -12  196.13    5.31
  12  -9   3  204.09    7.10
  -9  -3 -12  201.28    5.63
   3  12  -9  209.33    6.86
  12   9  -3  190.89    5.38
  -3  12   9  206.06    6.58
  -3 -12  -9  195.50    5.89
 -12   9   3  205.59    6.55
   9   3 -12  200.29    6.63
  -9   4 -12  107.55    3.08
  12  -9  -4   99.73    3.94
   4 -12  -9  105.31    3.45
  -4  12  -9  106.12    3.59
   9  -4 -12  103.65    3.38
   9   4  12  104.92    3.58
   4  12   9   99.02    3.42
 -12   9  -4  106.73    3.28
   9   4 -12  104.41    3.48
   4  12  -9  100.83    4.18
  -9  -4 -12   98.20    2.60
 -12   9   4  106.31    3.95
  12  -9   4  102.09    3.81
  -4  12   9  103.68    3.38
   4 -12   9  101.81    4.71
  -4  12   9  105.66    3.31
  12   9  -4  103.32    2.85
  -9  -4 -12  107.48    2.74
  -4 -12  -9   99.55    3.16
   9  -5 -12   61.82    2.94
   5 -12  -9   66.41    3.13
  -5  12  -9   67.70    3.25
   9   5  12   66.52    2.59
  -9   5 -12   69.45    2.53
   9  -5 -12   66.99    2.73
   5  12   9   65.40    2.42
 -12   9  -5   68.05    2.71
  12  -9  -5   64.10    2.90
  12   9  -5   62.72    1.67
   5 -12   9   67.23    2.65
  -9  -5 -12   64.80    1.65
   5  12  -9   64.48    2.28
  12  -9   5   62.97    2.10
   9   5 -12   62.30    2.27
  -5 -12  -9   64.81    1.76
  -5  12   9   64.12    3.05
 -12   9   5   67.13    2.84
  -9  -5 -12   65.26    1.64
  -5  12   9   68.68    2.66
  -9   6 -12  466.79   16.71
   6  12   9  452.54   18.02
  -6  12  -9  458.15   18.19
 -12   9  -6  497.77   18.70
   6 -12  -9  481.28   18.85
   9  -6 -12  465.58   17.05
  12  -9  -6  446.25   17.30
   9  -6 -12  479.86   17.95
   9   6  12  474.92   17.04
  -6  12   9  447.33   17.68
   6 -12   9  459.75   18.70
  -6 -12  -9  468.28   15.69
 -12   9   6  467.18   17.00
   6  12  -9  471.16   18.22
   9   6 -12  459.47   16.73
  12   9  -6  481.84   16.73
  12  -9   6  475.82   17.05
   7  12   9  244.04    8.52
   9  -7 -12  259.21    8.88
   9   7  12  257.26    9.32
  -9   7 -12  276.23    9.63
  12  -9  -7  256.56    8.65
 -12   9  -7  278.90    9.76
   7 -12  -9  257.59    8.91
  -7  12  -9  253.24    8.73
   9  -7 -12  264.42    9.19
  12   9   7  257.59    8.64
   7  12  -9  269.60    8.97
  12   9  -7  267.74    8.64
  -7 -12  -9  255.66    7.72
  -7  12   9  255.22    8.77
   7 -12   9  255.79    8.99
  12  -9   7  263.75    9.37
   9   7 -12  255.71    9.37
   9  -8 -12  717.05   29.34
 -12   9  -8  785.11   31.44
  12  -9  -8  718.05   30.24
   8 -12  -9  717.53   29.20
   9   8  12  726.03   30.34
  -9   8 -12  774.23   30.86
   8  12   9  726.68   30.83
   9  -8 -12  707.44   29.82
  -8  12  -9  726.79   29.64
  12   9   8  765.88   30.66
  12  -9   8  742.60   30.81
  -8  12   9  708.64   30.30
   8 -12   9  729.00   31.50
   8  12  -9  757.14   30.38
   9  -8  12  720.75   30.45
   9   8 -12  707.96   29.67
  12   9  -8  698.40   27.36
 -12   9  -9  570.40   22.43
  -9  12  -9  556.34   22.64
   9   9  12  541.26   20.75
  12   9   9  537.87   20.52
   9  -9 -12  523.29   21.30
   9 -12  -9  539.91   20.68
  -9   9 -12  550.77   22.12
   9  12   9  564.36   21.70
  12  -9  -9  542.92   20.65
   9  -9  12  568.57   22.91
   9   9 -12  545.88   21.76
  12  -9   9  575.79   22.81
  -9  12   9  546.64   21.23
  12   9  -9  577.24   21.86
   9  12  -9  570.23   21.55
   9 -12   9  525.17   21.67
   9 -10 -12  897.26   40.16
  10  12   9  949.25   40.94
   9  10  12  944.51   40.65
  10 -12  -9  901.54   40.28
  12   9  10  862.03   38.65
  12  -9 -10  878.26   37.81
  -9  10 -12  944.00   42.02
 -12   9 -10  936.75   40.16
 -10  12  -9  916.72   41.25
  10 -12   9  908.35   40.78
   9  10 -12  929.81   39.87
   9 -10  12  918.78   41.56
  10  12  -9  961.89   41.67
  12  -9  10  902.46   40.14
  12   9 -10  875.03   37.24
  11 -12  -9    2.28    0.59
   9  11  12    1.90    0.90
 -12   9 -11    2.46    0.63
  12  -9 -11    2.31    0.55
 -11  12  -9    3.71    0.83
  11  12   9    1.95    0.59
   9 -11 -12    1.85    0.59
  12   9  11    2.54    0.50
  11  12  -9    1.90    0.58
  12  -9  11    2.00    0.48
  11 -12   9    2.04    0.86
   9 -11  12    1.38    0.94
  12   9 -11    2.67    0.61
   9  11 -12    1.07    0.47
  10   0 -12 1065.08   46.43
   0  12 -10  982.93   42.21
 -10   0 -12  969.01   39.45
   0 -12 -10  962.47   40.72
 -12  10   0  973.98   41.61
  12 -10   0  972.15   41.22
  10   0 -12  927.81   40.77
   0  12  10  947.90   41.91
   0 -12  10  918.67   40.38
   1  12  10   87.58    3.00
 -12  10  -1   90.22    3.54
  10  -1 -12   96.09    3.03
 -10   1 -12   83.52    2.24
  10  -1 -12   91.55    2.93
  12 -10  -1   87.48    3.55
  -1  12 -10   91.27    3.24
  -1 -12  10   93.03    4.42
   1 -12 -10   88.38    3.44
 -10  -1 -12   96.15    2.61
   1 -12  10   90.70    3.43
 -12  10   1   91.14    3.57
  12 -10   1   86.87    2.84
   1  12 -10   88.16    3.06
  -1 -12 -10   87.16    2.67
  -1  12  10   90.07    3.03
  10   1 -12   89.55    3.46
 -12  10  -2    1.79    0.74
  10  -2 -12    5.42    0.75
  -2  12 -10    2.67    0.60
 -10   2 -12    2.17    0.43
  10  -2 -12    2.44    0.49
  12 -10  -2    2.52    0.50
   2 -12 -10    1.94    0.48
   2  12  10    3.08    0.87
  -2 -12  10    2.38    0.66
  -2 -12 -10    3.06    0.38
 -10  -2 -12    1.91    0.24
  10   2 -12    3.15    0.87
   2 -12  10    2.30    0.67
  -2  12  10    2.28    0.49
 -12  10   2    2.19    0.47
 -10  -2 -12    3.46    0.30
  12 -10   2    1.88    0.78
   2  12 -10    3.12    0.59
  10   2 -12    2.26    0.72
  10   3  12  167.53    5.44
  10  -3 -12  173.36    5.52
 -10   3 -12  184.54    5.28
  -3  12 -10  168.04    6.61
   3  12  10  170.90    6.53
  10  -3 -12  179.20    6.27
  12 -10  -3  169.76    6.23
 -12  10  -3  182.02    5.69
   3 -12 -10  168.73    5.47
  12  10  -3  147.19    4.15
   3 -12  10  167.97    5.86
   3  12 -10  164.91    5.53
 -10  -3 -12  165.36    4.42
 -10  -3 -12  156.20    4.22
 -12  10   3  175.71    5.62
  -3  12  10  172.99    5.54
  10   3 -12  172.82    5.40
  12 -10   3  167.45    6.06
  10   3 -12  165.66    5.46
  -3 -12 -10  161.89    5.29
   4 -12 -10  346.93   12.19
  10  -4 -12  354.41   13.27
   4  12  10  336.72   13.16
 -10   4 -12  355.18   11.75
  10  -4 -12  370.20   13.29
  -4  12 -10  336.72   12.04
  12 -10  -4  360.82   13.36
  10   4  12  350.32   11.76
 -12  10  -4  374.55   12.89
   4  12 -10  373.53   14.07
 -12  10   4  340.36   12.81
  10   4 -12  359.85   12.49
   4 -12  10  339.85   12.43
  12 -10   4  375.06   13.59
  -4  12  10  370.55   12.84
  12  10  -4  351.21   11.30
  -4 -12 -10  348.51   11.39
   5  12  10  407.41   15.84
  10   5  12  407.41   14.86
 -10   5 -12  419.44   14.97
   5 -12 -10  410.17   14.80
  -5  12 -10  413.69   16.05
  10  -5 -12  425.37   14.73
  12 -10  -5  423.80   15.92
  10  -5 -12  394.79   15.11
 -12  10  -5  450.17   15.86
   5  12 -10  431.84   15.42
   5 -12  10  421.31   16.75
  -5 -12 -10  397.86   13.25
  10   5 -12  396.85   14.28
  12 -10   5  398.90   14.11
  12  10  -5  393.77   12.97
 -12  10   5  416.61   14.87
  12 -10  -6  450.16   17.47
   6  12  10  451.40   16.71
  10   6  12  453.52   16.28
   6 -12 -10  457.71   18.14
  10  -6 -12  445.61   16.40
 -10   6 -12  480.59   17.04
  -6  12 -10  477.03   17.66
  10  -6 -12  456.68   16.33
 -12  10  -6  476.95   17.37
  -6 -12 -10  456.90   15.79
  12 -10   6  468.33   16.84
  10   6 -12  454.77   16.55
  12  10  -6  458.76   16.11
   6 -12  10  465.58   17.50
 -12  10   6  460.49   16.92
   6  12 -10  442.89   17.39
 -12  10  -7  466.71   17.63
  -7  12 -10  461.64   16.88
 -10   7 -12  444.40   15.96
  10  -7 -12  420.97   15.45
  10  -7 -12  434.84   16.08
  12  10   7  437.63   16.03
  10   7  12  445.39   16.77
  12 -10  -7  414.38   15.14
   7  12  10  435.57   17.24
   7 -12 -10  452.05   17.62
   7 -12  10  430.66   17.42
  12 -10   7  437.36   15.82
 -12  10   7  445.32   17.15
  12  10  -7  435.12   14.92
   7  12 -10  424.41   15.56
  10   7 -12  435.83   16.66
   8  12  10  118.92    4.17
   8 -12 -10  127.93    4.43
  10  -8 -12  113.07    3.97
  10  -8 -12  117.50    4.16
  10   8  12  121.11    4.58
  12 -10  -8  117.01    4.82
 -10   8 -12  132.56    4.70
  -8  12 -10  129.74    5.14
  12  10   8  125.72    4.93
 -12  10  -8  126.11    4.68
  12  10  -8  122.13    3.95
   8 -12  10  116.89    4.20
  10  -8  12  125.22    4.78
  10   8 -12  122.80    4.61
  12 -10   8  121.42    3.95
   8  12 -10  121.34    3.98
  10  -9 -12  523.41   21.66
  -9  12 -10  575.27   23.35
  10   9  12  557.94   22.47
  12  10   9  573.38   22.96
  12 -10  -9  556.76   21.34
 -10   9 -12  594.08   23.32
   9 -12 -10  525.07   21.73
  10  -9 -12  442.91   16.96
 -12  10  -9  565.56   21.68
   9  12  10  607.60   24.47
   9 -12  10  536.64   21.02
  10  -9  12  573.42   23.01
  12  10  -9  545.60   20.34
  10   9 -12  540.82   21.58
  12 -10   9  596.54   23.67
   9  12 -10  547.36   20.95
 -12  10 -10  188.69    6.19
  10  10  12  180.35    6.18
  10 -10 -12  167.28    6.93
  12 -10 -10  171.10    5.96
  10 -12 -10  165.14    5.93
 -10  10 -12  178.79    5.98
  10  12  10  179.02    7.25
  12  10  10  176.59    6.02
 -10  12 -10  181.42    7.04
  10 -12  10  172.37    6.08
  12 -10  10  177.73    6.77
  10 -10  12  182.32    7.13
  10  12 -10  169.10    5.62
  10  10 -12  184.75    6.04
  12  10 -10  183.05    5.81
  10 -11 -12 1149.21   55.60
  11  12  10 1245.89   60.07
 -11  12 -10 1247.80   59.75
  12  10  11 1154.39   55.80
  11 -12 -10 1175.10   55.09
 -10  11 -12 1287.43   59.63
  12 -10 -11 1189.36   55.46
  10  11  12 1131.37   55.26
 -12  10 -11 1200.94   57.41
  11  12 -10 1251.94   58.68
  12  10 -11 1148.17   54.73
  11 -12  10 1194.18   57.89
  12 -10  11 1193.82   57.83
  10  11 -12 1181.20   55.11
  10 -11  12 1205.99   58.51
   0  12  11  356.52   13.67
 -11   0 -12  363.32   11.37
 -12  11   0  367.60   12.93
   0  12 -11  353.13   12.68
  12 -11   0  360.52   12.60
   0 -12 -11  356.71   12.26
  11   0 -12  360.52   13.31
  11   0 -12  401.34   14.67
   0 -12  11  350.63   14.42
   1 -12 -11    2.91    0.69
 -12  11  -1    1.84    0.72
  -1  12 -11    2.00    0.58
  11  -1 -12    1.78    0.71
  12 -11  -1    1.84    0.80
   1  12  11    1.99    0.51
  -1 -12  11    0.12    0.66
  11  -1 -12    2.32    0.44
  12 -11   1    2.27    0.77
   1  12 -11    4.00    0.57
  11   1 -12    1.91    0.68
  -1  12  11    2.44    0.50
   1 -12  11    2.34    0.65
 -12  11   1    2.04    0.48
  -1 -12 -11    3.73    0.61
 -11  -1 -12    1.93    0.26
   2 -12 -11  171.38    5.50
  -2  12 -11  171.48    5.79
  11  -2 -12  171.64    6.23
  11  -2 -12  176.30    6.21
   2  12  11  169.62    5.66
  12 -11  -2  172.04    5.58
 -11   2 -12  163.31    4.96
 -12  11  -2  174.00    6.39
  12 -11   2  181.21    6.60
  11   2 -12  167.37    6.28
   2 -12  11  172.84    6.08
 -12  11   2  169.49    6.27
   2  12 -11  170.46    5.77
  11   2 -12  174.07    6.16
  -2 -12 -11  171.53    5.72
  -2  12  11  167.56    5.54
   3 -12 -11  667.55   26.08
  11  -3 -12  681.00   27.05
 -12  11  -3  680.74   27.60
 -11   3 -12  660.30   25.15
  11  -3 -12  672.00   26.10
  -3  12 -11  618.60   26.00
   3  12  11  624.14   24.69
  11   3  12  641.52   25.03
  12 -11  -3  669.14   26.11
   3 -12  11  668.49   28.24
 -12  11   3  660.76   27.06
  11   3 -12  667.33   26.65
  12 -11   3  625.83   24.47
  -3 -12 -11  662.33   25.65
   3  12 -11  668.29   26.40
  -3  12  11  646.71   25.66
  11   3 -12  646.23   26.50
  -4  12 -11   29.55    1.39
  11  -4 -12   28.98    1.30
  12 -11  -4   31.15    1.34
 -12  11  -4   30.40    1.73
   4  12  11   27.54    1.34
   4 -12 -11   29.06    1.32
 -11   4 -12   27.69    1.20
  11  -4 -12   28.65    1.11
  11   4  12   27.64    0.99
  -4 -12 -11   28.93    1.19
  11   4 -12   28.72    1.52
   4 -12  11   29.88    2.28
  12 -11   4   29.61    1.27
 -12  11   4   29.22    1.30
  11   4 -12   29.97    1.26
   4  12 -11   30.43    1.93
  12  11  -4   25.75    0.85
 -12  11  -5  436.90   16.49
   5  12  11  395.91   14.48
   5 -12 -11  414.66   14.87
 -11   5 -12  450.23   15.89
  11   5  12  404.91   14.75
  11  -5 -12  413.57   14.75
  -5  12 -11  407.57   15.90
  12 -11  -5  423.05   15.08
  11  -5 -12  419.28   14.58
   5 -12  11  393.20   14.77
 -12  11   5  422.19   15.21
  12  11  -5  412.20   14.07
  -5 -12 -11  395.27   13.63
  12 -11   5  400.41   14.31
   5  12 -11  411.69   14.98
  11   5 -12  406.46   14.60
 -12  11  -6    2.52    0.76
 -11   6 -12    3.08    0.36
   6  12  11    2.37    0.58
  12 -11  -6    3.14    0.56
  11  -6 -12    2.65    0.53
  11   6  12    2.39    0.64
   6 -12 -11    3.49    0.88
  11  -6 -12    3.11    0.39
  -6  12 -11    3.03    0.58
  11   6 -12    2.92    0.48
  12  11  -6    2.90    0.43
 -12  11   6    2.68    0.85
   6 -12  11    3.21    1.01
  12 -11   6    2.16    0.51
  -6 -12 -11    3.83    0.39
   6  12 -11    2.60    0.82
  11   7  12  293.60   10.44
  11  -7 -12  284.34    9.79
 -12  11  -7  287.95    9.93
   7 -12 -11  284.69   10.97
  -7  12 -11  284.68    9.98
  11  -7 -12  285.69    9.94
  12  11   7  289.28   10.07
 -11   7 -12  308.10   10.12
  12 -11  -7  271.31   10.39
   7  12  11  284.45   10.97
  11   7 -12  285.20    9.63
 -12  11   7  285.75   10.87
  12 -11   7  290.55   10.67
   7 -12  11  290.02   10.31
   7  12 -11  295.94   10.85
  12  11  -7  274.45    9.21
 -12  11  -8   84.77    3.50
  11  -8 -12   80.31    2.95
   8  12  11   82.18    3.04
  -8  12 -11   86.01    3.74
  11  -8 -12   85.74    3.74
 -11   8 -12   85.42    2.73
  12 -11  -8   78.38    3.64
  12  11   8   87.95    3.83
  11   8  12   82.78    3.33
   8 -12 -11   84.19    3.10
  12 -11   8   86.90    3.58
  12  11  -8   85.87    2.90
   8 -12  11   86.06    3.22
  11  -8  12   86.58    2.90
  11   8 -12   84.36    3.33
   8  12 -11   88.29    2.94
  11  -9 -12 1200.15   58.28
  11   9  12 1262.96   60.46
  12 -11  -9 1177.60   55.38
 -11   9 -12 1273.96   59.64
   9  12  11 1190.25   56.41
 -12  11  -9 1317.18   61.87
   9 -12 -11 1234.84   60.06
  -9  12 -11 1256.33   60.66
[truncated: 15,516,611 more chars]
